# Supplementary material for: Proteostasis modulates gene dosage evolution in antibiotic-resistant bacteria
Source: bioRxiv preprint, doi:10.1101/2024.07.15.603526, version 2 (2025-01-08)
Supplement: Supplementary File 1 [file 603526_file18.xlsx]

## Sheet: LTMPR1 vs lon
Gene	Gene symbol	baseMean	log2FoldChange	lfcSE	stat	pvalue	padj	Lon_1	Lon_2	Lon_3	LTMPR1_1	LTMPR1_2	LTMPR1_3
b0001	thrL	314.12	0.543513	0.300328	1.80973	0.0703372	0.205102	242.889	244.073	280.215	386.416	249.372	481.755		Note: RNA sequencing to determine gene regulatory changes in LTMPR1 isolate. E.coli △lon (labelled as "Lon") was used as the reference strain.
b0002	thrA	1759.02	-1.82386	0.318666	-5.72343	1.04392e-08	3.22625e-07	1676.16	3361.37	3191.92	843.089	677.007	804.588
b0003	thrB	1219.78	-0.859428	0.203315	-4.22709	2.36735e-05	0.000303738	1368.71	1791.5	1558.04	884.605	759.806	956.021
b0004	thrC	1666.94	-0.501177	0.182604	-2.74462	0.00605818	0.031983	1817.29	2123.44	1919.37	1432.83	1508.9	1199.81
b0005	yaaX	62.8212	-0.384026	0.349111	-1.10001	0.271326	0.503196	75.4926	58.5775	79.008	62.8059	65.2654	35.778
b0006	yaaA	402.969	0.234646	0.169364	1.38546	0.165912	0.365319	369.804	377.825	363.437	395.996	459.78	450.969
b0007	yaaJ	612.26	0.385902	0.220288	1.75181	0.0798066	0.223776	596.282	578.941	417.162	744.09	673.11	663.973
b0008	talB	21968.1	0.0719278	0.241703	0.297587	0.766018	0.887714	22145.6	21273.4	20842.3	24885	26267.9	16394.6
b0009	mog	962.417	-0.481127	0.186096	-2.58537	0.00972749	0.0470162	1241.8	1060.25	1061.87	837.766	868.906	703.911
b0010	satP	250.843	-0.274609	0.228697	-1.20076	0.229846	0.456417	249.454	269.457	305.498	209.708	199.693	271.247
b0011	yaaW	8.73313	-0.0301378	0.71097	-0.0423897	0.966188	0.983611	10.941	2.92888	12.6413	8.51605	10.7152	6.65637
b0012	mbiA	0	NA	NA	NA	NA	NA	0	0	0	0	0	0
b0013	yaaI	10.0542	-0.415247	0.567499	-0.731714	0.464343	0.679827	10.941	9.76292	13.6947	10.6451	7.79288	7.48841
b0014	dnaK	65115.3	-2.41987	0.225802	-10.7168	8.48962e-27	2.24657e-24	127372	107179	94625.3	21053.8	23576.4	16884.7
b0015	dnaJ	6136.86	-1.86708	0.16501	-11.3149	1.10697e-29	3.3478e-27	9333.73	10640.6	8924.75	2748.55	2429.43	2744.09
b0016	insL1	112.024	-1.90825	0.356198	-5.35728	8.44844e-08	2.08546e-06	142.232	183.543	204.367	54.2898	59.4207	28.2896
b0018	mokC	0	NA	NA	NA	NA	NA	0	0	0	0	0	0
b0019	nhaA	1656.47	-0.493193	0.339412	-1.45308	0.146202	0.335324	2447.49	1691.91	1671.81	1233.76	946.835	1946.99
b0020	nhaR	968.593	0.05686	0.205956	0.276078	0.782488	0.896747	1062.37	876.71	910.172	888.863	912.741	1160.7
b0021	insB1	47.3681	-0.564804	0.491297	-1.14962	0.250301	0.48058	77.6808	43.9332	48.4583	19.1611	35.068	59.9073
b0022	insA1	7.4529	-1.29719	0.788773	-1.64457	0.100059	0.261836	4.37638	11.7155	15.8016	2.12901	4.87055	5.82432
b0023	rpsT	803.497	0.56203	0.294207	1.91032	0.056092	0.174885	606.129	685.357	655.24	736.638	1341.35	796.268
b0024	yaaY	285.126	0.592354	0.297387	1.99187	0.0463856	0.152957	206.784	261.646	213.848	356.61	236.709	435.16
b0025	ribF	1770.82	0.625091	0.190682	3.27819	0.00104475	0.00795586	1611.6	1338.5	1229.36	2024.69	2333.97	2086.77
b0026	ileS	8401.51	0.307858	0.194275	1.58465	0.113046	0.283722	6967.2	7911.87	7645.87	9403.85	10666.5	7813.74
b0027	lspA	563.609	0.361965	0.259829	1.39309	0.163592	0.362075	392.781	526.222	560.43	624.865	765.651	511.708
b0028	fkpB	622.133	0.720473	0.300672	2.39621	0.0165658	0.0699297	362.146	557.463	489.85	699.381	1019.89	604.065
b0029	ispH	727.188	0.758434	0.277236	2.7357	0.00622483	0.0326187	462.803	640.448	517.239	936.765	1131.92	673.957
b0030	rihC	5565.35	0.241069	0.280798	0.858516	0.390608	0.62011	5215.56	5191.92	4896.39	6960.81	7157.76	3969.69
b0031	dapB	1377.34	1.18962	0.178531	6.66336	2.67635e-11	1.34901e-09	845.736	840.588	832.218	1950.18	2142.07	1653.28
b0032	carA	355.405	-0.574834	0.511108	-1.12468	0.260724	0.491061	194.749	520.364	560.43	296.997	415.945	143.944
b0033	carB	1721.23	1.40483	0.749801	1.8736	0.0609853	0.186031	509.849	1021.2	1299.95	1042.15	5831.02	623.202
b0034	caiF	250.778	2.07624	0.578896	3.58656	0.00033507	0.00313869	82.0572	109.345	96.9165	240.578	814.356	161.417
b0035	caiE	37.4972	0.222361	0.37115	0.599115	0.549096	0.74396	37.1993	40.028	26.336	44.7093	46.7573	29.9537
b0036	caiD	57.3463	0.440527	0.464075	0.949258	0.342489	0.577729	28.4465	75.1745	42.1376	50.0318	92.5405	55.7471
b0037	caiC	126.167	0.786908	0.267072	2.94642	0.00321471	0.0196977	90.81	115.202	71.6339	149.031	159.754	170.569
b0038	caiB	144.178	1.21655	0.235005	5.1767	2.25849e-07	5.14109e-06	80.9631	78.1034	101.13	223.546	189.952	191.371
b0039	caiA	406.805	0.786143	0.240274	3.27187	0.0010684	0.00807788	231.948	333.892	329.727	569.511	449.065	526.685
b0040	caiT	41.6956	0.938728	0.340303	2.7585	0.00580666	0.031003	28.4465	36.1228	21.0688	55.3543	52.602	56.5791
b0041	fixA	20.5753	1.69648	0.514707	3.29601	0.000980671	0.00756313	7.65867	9.76292	11.5878	29.8062	43.835	20.8012
b0042	fixB	19.8747	-0.106049	0.510426	-0.207766	0.835412	0.921609	21.8819	14.6444	25.2826	14.9031	29.2233	13.3127
b0043	fixC	26.0411	1.29755	0.47399	2.73751	0.00619053	0.0325195	16.4114	7.81034	21.0688	36.1932	44.8091	29.9537
b0044	fixX	1.80937	0.688927	1.34933	0.510569	0.609653	NA	2.18819	1.95258	0	2.12901	2.92233	1.66409
b0045	yaaU	21.6541	0.811338	0.531434	1.5267	0.126837	0.306522	21.8819	14.6444	10.5344	42.5802	19.4822	20.8012
b0046	kefF	171.573	1.36391	0.241917	5.63793	1.72106e-08	5.02551e-07	100.657	77.1271	110.611	223.546	267.88	249.614
b0047	kefC	391.039	1.31128	0.222722	5.88752	3.92023e-09	1.37808e-07	269.148	222.595	182.245	558.866	588.363	525.021
b0048	folA	891.177	1.17277	0.21412	5.47718	4.32164e-08	1.14948e-06	638.952	554.534	449.819	1170.96	1169.91	1362.89
b0049	apaH	898.432	1.05057	0.163534	6.42416	1.326e-10	5.97263e-09	632.388	542.818	580.446	1133.7	1227.38	1273.86
b0050	apaG	730.823	0.941489	0.254011	3.70649	0.000210155	0.00208873	578.777	450.071	472.995	977.217	739.35	1166.53
b0051	rsmA	2168.62	0.753948	0.275114	2.7405	0.00613466	0.0323061	2154.28	1383.41	1306.27	2770.91	2334.94	3061.93
b0052	pdxA	1186.59	1.0051	0.197971	5.07701	3.83419e-07	8.28263e-06	926.699	774.2	666.828	1652.11	1525.46	1574.23
b0053	surA	5609.05	0.638707	0.164224	3.88925	0.000100553	0.00108056	4826.06	4272.25	4064.17	6525.42	6552.84	7413.53
b0054	lptD	12622.6	1.00555	0.221131	4.54729	5.43413e-06	8.10145e-05	9966.12	7758.59	7456.25	17445.1	14194.7	18914.9
b0055	djlA	352.496	1.07996	0.253505	4.26011	2.04329e-05	0.000268674	234.137	251.883	192.78	517.35	549.398	369.428
b0056	yabP	40.7616	1.22897	0.407849	3.01331	0.00258417	0.0165528	14.2232	30.2651	28.4429	67.0639	43.835	60.7394
b0057	yabQ	21.4345	2.35211	0.579915	4.05595	4.9931e-05	0.000587244	7.65867	1.95258	11.5878	43.6448	32.1456	31.6177
b0058	rluA	272.056	0.658819	0.295074	2.23273	0.025567	0.0984099	221.007	205.998	206.474	266.127	271.777	460.953
b0059	rapA	1449.7	0.495353	0.135533	3.65484	0.000257338	0.00250476	1198.04	1208.65	1203.03	1736.21	1619.95	1732.32
b0060	polB	1761.13	0.556789	0.177413	3.13837	0.00169888	0.0118502	1503.29	1415.62	1357.88	2030.01	1876.14	2383.81
b0061	araD	155.524	0.778636	0.302978	2.56995	0.0101714	0.0487722	109.41	120.084	113.772	215.03	242.553	132.295
b0062	araA	689.385	0.405092	0.18659	2.17103	0.0299291	0.110254	636.764	577.965	564.644	829.25	850.398	677.285
b0063	araB	399.23	0.21877	0.266279	0.821581	0.411315	0.638735	447.485	329.01	330.78	354.481	536.735	396.886
b0064	araC	1187.37	-0.11859	0.191323	-0.61984	0.535363	0.733625	1115.98	1208.65	1384.22	996.378	1188.41	1230.6
b0065	yabI	1058.69	-0.0484684	0.223946	-0.216429	0.828654	0.919423	1341.36	942.122	945.989	1102.83	1041.32	978.486
b0066	thiQ	277.79	-0.0963706	0.250256	-0.385088	0.700172	0.84822	355.581	268.48	237.024	307.642	248.398	249.614
b0067	thiP	75.3576	0.654076	0.313564	2.08594	0.0369839	0.129432	71.1162	64.4353	40.0307	95.8056	98.3852	82.3726
b0068	thiB	123.982	0.979062	0.270845	3.61484	0.000300533	0.00286589	76.5867	97.6292	75.8477	154.353	199.693	139.784
b0069	sgrR	574.425	0.754082	0.184272	4.09223	4.27251e-05	0.000506718	458.426	392.469	431.911	809.025	679.929	674.789
b0070	setA	106.045	1.03962	0.323038	3.21825	0.00128974	0.00944434	57.9871	84.9374	65.3133	135.192	108.126	184.714
b0071	leuD	297.618	1.20103	0.205282	5.85061	4.89785e-09	1.67238e-07	175.055	162.065	204.367	431.125	372.11	440.984
b0072	leuC	333.695	1.04739	0.22356	4.68506	2.79876e-06	4.66533e-05	226.478	206.974	219.116	515.221	472.444	361.94
b0073	leuB	175.692	1.27366	0.26392	4.82593	1.39353e-06	2.51073e-05	86.4336	129.847	91.6493	261.869	268.854	215.5
b0074	leuA	270.145	0.979704	0.220721	4.43865	9.05264e-06	0.000129928	165.209	163.041	217.009	381.093	369.188	325.33
b0075	leuL	196.483	0.604682	0.270286	2.23719	0.025274	0.0977262	126.915	138.633	202.261	209.708	260.087	241.293
b0076	leuO	84.6261	1.60314	0.327014	4.90235	9.46974e-07	1.78749e-05	59.0812	31.2414	35.817	116.031	126.634	138.952
b0077	ilvI	171.632	0.651434	0.218792	2.97742	0.00290688	0.0182607	118.162	145.468	136.947	185.224	225.994	217.996
b0078	ilvH	48.7927	0.934395	0.338833	2.75769	0.00582119	0.0310415	36.1052	36.1228	28.4429	65.9994	48.7055	77.3803
b0080	cra	2709.7	0.110628	0.171734	0.644185	0.519456	0.722528	2473.75	2637.94	2705.23	3186.07	2715.82	2539.4
b0081	mraZ	2590.88	0.49959	0.169914	2.94024	0.00327954	0.0200369	2191.47	2128.32	2120.58	3170.1	2629.12	3305.72
b0082	rsmH	2430.61	0.816287	0.204824	3.98532	6.73898e-05	0.000756839	2050.34	1714.37	1518.01	2969.97	2852.2	3478.78
b0083	ftsL	407.055	0.704736	0.268164	2.628	0.00858876	0.0426317	404.816	257.741	266.52	524.802	433.479	554.975
b0084	ftsI	1139.75	0.713212	0.176815	4.03366	5.4915e-05	0.000637014	904.818	824.967	861.714	1300.83	1334.53	1611.67
b0085	murE	2425.69	0.851777	0.19881	4.28439	1.83244e-05	0.000246897	1945.3	1750.49	1493.78	2862.46	2970.06	3532.04
b0086	murF	3898.94	0.997971	0.213857	4.66652	3.06338e-06	4.9886e-05	3195.85	2429.02	2180.62	5325.72	4974.78	5287.65
b0087	mraY	1304.33	1.00068	0.192266	5.20466	1.94352e-07	4.47221e-06	927.794	892.331	787.973	1739.4	1509.87	1968.62
b0088	murD	2181.45	0.720741	0.154099	4.67714	2.90911e-06	4.81139e-05	1781.19	1604.05	1558.04	2633.59	2615.49	2896.35
b0089	ftsW	1184.56	0.851809	0.166424	5.1183	3.08307e-07	6.83441e-06	844.642	773.223	916.493	1548.86	1412.46	1611.67
b0090	murG	1501.83	0.944328	0.144219	6.54789	5.83554e-11	2.71513e-09	1054.71	1011.44	1015.52	2003.4	1850.81	2075.12
b0091	murC	3553.99	1.03235	0.142152	7.26225	3.80696e-13	2.59978e-11	2264.78	2445.61	2291.23	5062.79	4727.36	4532.15
b0092	ddlB	2186.93	0.842531	0.170815	4.93243	8.12135e-07	1.5846e-05	1725.39	1535.71	1436.89	2869.91	2559.96	2993.7
b0093	ftsQ	2300.23	0.954001	0.249929	3.81709	0.000135034	0.00141518	1785.56	1618.69	1294.68	3216.94	2353.45	3532.04
b0094	ftsA	3365.34	0.909596	0.146217	6.22085	4.94477e-10	2.05256e-08	2539.4	2272.81	2202.74	4483.7	4280.24	4413.17
b0095	ftsZ	13774.5	0.868974	0.177348	4.89982	9.59244e-07	1.7971e-05	10662	10040.2	8539.19	19227.1	16348.5	17829.9
b0096	lpxC	50156.6	0.260412	0.166672	1.56242	0.118189	0.292468	47771.5	45442.5	43712.5	57415.2	47742.1	58855.6
b0097	secM	2826.31	0.802984	0.162133	4.95263	7.32177e-07	1.45542e-05	1832.61	2175.18	2170.09	3710.87	3674.34	3394.75
b0098	secA	9387.99	-0.050696	0.36999	-0.13702	0.891015	0.945119	5816.22	10939.4	11902.8	9611.43	11788.7	6269.47
b0099	mutT	79.9871	1.29836	0.316798	4.09837	4.16078e-05	0.000494853	33.917	50.7672	53.7255	120.289	130.531	90.693
b0101	yacG	80.9398	1.13016	0.334924	3.37438	0.00073981	0.00602376	67.834	36.1228	48.4583	130.934	109.1	93.1892
b0102	zapD	473.54	1.40137	0.171921	8.15123	3.6024e-16	3.81314e-14	284.465	254.812	241.238	655.736	699.411	705.575
b0103	coaE	195.087	1.08165	0.235694	4.58922	4.44909e-06	6.95108e-05	146.609	124.965	104.291	258.675	240.605	295.376
b0104	guaC	722.822	1.49987	0.459194	3.2663	0.00108963	0.00817994	284.465	423.711	424.536	875.024	1799.18	530.013
b0106	hofC	72.1679	0.777833	0.265181	2.93322	0.00335468	0.0204077	43.7638	56.6249	58.9927	89.4185	93.5146	90.693
b0107	hofB	248.525	0.373278	0.205304	1.81817	0.0690374	0.202147	213.349	241.144	194.886	306.578	252.295	282.896
b0108	ppdD	8.1409	0.992977	0.745848	1.33134	0.183077	0.393397	2.18819	9.76292	4.21376	14.9031	7.79288	9.98455
b0109	nadC	470.855	0.621775	0.179194	3.46985	0.000520746	0.00450888	356.675	381.73	373.971	584.414	622.457	505.884
b0110	ampD	591.404	0.332744	0.176414	1.88616	0.0592735	0.182387	496.72	535.008	538.308	679.155	715.971	583.264
b0111	ampE	627.391	0.589664	0.205032	2.87597	0.0040279	0.0232662	552.519	519.387	430.857	703.639	858.191	699.751
b0112	aroP	640.044	0.420413	0.216945	1.93787	0.0526388	0.166946	565.648	539.89	537.255	703.639	606.871	886.961
b0113	pdhR	307.091	-0.440412	0.276735	-1.59146	0.111507	0.281023	256.018	399.304	405.574	256.546	223.071	302.033
b0114	aceE	9486.67	0.798879	0.29082	2.74699	0.00601444	0.031846	5585.36	7167.94	8021.95	12759.2	14942.9	8442.77
b0115	aceF	5935.06	0.623431	0.41345	1.50788	0.131586	0.314073	2816.2	5276.86	5923.49	7435.58	9962.23	4196.01
b0116	lpd	27863.9	-0.494032	0.231875	-2.1306	0.0331223	0.117948	28690.5	36174.6	32900	28148.7	22581.8	18687.8
b0117	yacH	334.068	0.867491	0.269577	3.21797	0.00129102	0.00944434	242.889	220.642	246.505	415.157	323.405	555.807
b0118	acnB	86154.2	-0.192768	0.302743	-0.636738	0.524295	0.725968	94119.6	91936.5	89647.8	115125	58918.1	67177.7
b0119	yacL	685.292	0.595194	0.196478	3.02931	0.00245114	0.0158445	563.46	542.818	531.987	729.187	772.47	971.83
b0120	speD	583.779	1.64305	0.256278	6.4112	1.44381e-10	6.43484e-09	265.865	282.148	301.284	855.863	1120.23	677.285
b0121	speE	840.874	1.45779	0.211908	6.87935	6.01247e-12	3.39424e-10	445.297	450.071	450.872	1284.86	1423.18	990.967
b0122	yacC	216.068	0.0118438	0.186344	0.0635585	0.949322	0.974421	229.76	215.761	200.154	207.579	225.994	217.164
b0123	cueO	629.089	0.760371	0.205424	3.70147	0.000214356	0.00212052	466.085	474.478	460.353	747.283	944.887	681.446
b0124	gcd	5446.09	-0.856867	0.422458	-2.02829	0.0425305	0.144406	7636.79	6965.85	6450.21	3792.84	1806	6024.85
b0125	hpt	296.89	0.146508	0.193751	0.756167	0.449549	0.666719	303.065	266.528	276.001	289.546	351.654	294.544
b0126	can	1950.62	0.730354	0.134955	5.41185	6.23776e-08	1.58754e-06	1537.21	1411.72	1452.69	2470.72	2428.46	2402.95
b0127	yadG	2908.7	-0.161562	0.181329	-0.890989	0.372935	0.605448	2865.44	2982.57	3365.74	3119	2515.15	2604.3
b0128	yadH	1729.27	-0.192694	0.206796	-0.931804	0.351438	0.584334	1572.22	1933.06	2027.87	1861.82	1513.77	1466.9
b0129	yadI	494.904	0.175236	0.21524	0.814144	0.415562	0.64098	377.463	532.079	484.583	569.511	512.382	493.403
b0130	yadE	231.4	1.40732	0.249349	5.64397	1.66173e-08	4.88595e-07	110.504	154.254	114.825	377.9	343.861	287.056
b0131	panD	545.744	1.32739	0.186259	7.12658	1.02895e-12	6.22369e-11	344.64	297.769	290.75	753.67	862.088	725.544
b0132	rpnC	102.169	0.381741	0.331142	1.1528	0.248991	0.479459	92.9982	57.6012	115.878	117.096	101.307	128.135
b0133	panC	1768.2	0.438366	0.205147	2.13684	0.0326114	0.116571	1589.72	1506.42	1408.45	1981.05	2412.87	1710.69
b0134	panB	2659.24	0.525623	0.25171	2.0882	0.0367795	0.129018	2730.86	2063.88	1745.55	3193.52	3551.61	2670.04
b0135	yadC	31.1123	0.992751	0.42517	2.33495	0.019546	0.0798821	19.6937	15.6207	27.3894	29.8062	40.9126	53.2509
b0136	yadK	10.0319	0.635995	0.771913	0.823921	0.409985	0.637955	2.18819	8.78663	12.6413	5.32253	14.6117	16.6409
b0137	yadL	20.1842	1.23341	0.465829	2.64777	0.00810251	0.0407435	7.65867	15.6207	12.6413	34.0642	25.3269	25.7934
b0138	yadM	18.9733	1.08578	0.48998	2.21597	0.0266937	0.101583	12.0351	9.76292	14.7482	18.0966	35.068	24.1293
b0139	htrE	22.2705	1.91192	0.67451	2.83453	0.0045893	0.0257365	2.18819	5.85775	20.0154	31.9352	37.0162	36.61
b0140	yadV	8.01804	0.141644	0.73549	0.192585	0.847284	0.925995	6.56458	5.85775	10.5344	3.19352	13.6375	8.32046
b0141	yadN	4.81815	2.1935	1.11372	1.96953	0.0488928	0.158134	2.18819	2.92888	0	14.9031	3.89644	4.99228
b0142	folK	20.5763	1.02324	0.424977	2.40776	0.0160506	0.0681628	14.2232	10.7392	15.8016	27.6772	29.2233	25.7934
b0143	pcnB	1158.38	0.918528	0.204192	4.49837	6.84776e-06	0.000100672	950.77	765.413	688.95	1396.63	1609.23	1539.29
b0144	gluQ	330.681	1.16994	0.194134	6.02646	1.67593e-09	6.39271e-08	178.338	229.429	202.261	482.221	444.194	447.641
b0145	dksA	12256.8	1.25471	0.249881	5.02122	5.13439e-07	1.07619e-05	8543.8	6730.56	6443.89	16805.4	13746.6	21270.4
b0146	sfsA	3337.64	1.16627	0.201225	5.79584	6.79791e-09	2.23119e-07	2284.47	1981.87	1906.73	4487.96	3988.98	5375.85
b0147	thpR	171.558	0.617266	0.253295	2.43694	0.014812	0.0643419	132.386	124.965	148.535	256.546	193.848	173.066
b0148	hrpB	1046.18	0.372078	0.142763	2.60627	0.00915338	0.0449078	858.865	949.932	927.027	1186.92	1172.83	1181.51
b0149	mrcB	1087.77	0.485286	0.153256	3.1665	0.00154283	0.0109093	854.489	984.103	880.676	1242.28	1311.15	1253.89
b0150	fhuA	1973.6	-0.345425	0.499118	-0.69207	0.488893	0.698607	3618.18	1814.93	1193.55	1427.5	1072.5	2714.97
b0151	fhuC	168.993	0.299097	0.449252	0.665768	0.50556	0.711098	239.607	127.894	87.4355	171.385	130.531	257.102
b0152	fhuD	130.711	0.999464	0.420734	2.37552	0.0175241	0.0731726	137.856	71.2693	52.672	163.934	136.375	222.156
b0153	fhuB	177.109	1.09212	0.230377	4.74056	2.13129e-06	3.66825e-05	128.009	114.226	96.9165	262.933	248.398	212.172
b0154	hemL	5578.45	2.46244	0.241398	10.2008	1.96675e-24	4.16362e-22	1679.44	1853	1607.55	9303.78	11750.7	7276.24
b0155	clcA	1489.64	0.699614	0.213665	3.27436	0.00105903	0.00803572	1346.83	916.738	1142.98	1750.05	1948.22	1833
b0156	erpA	1227.91	0.615312	0.171634	3.58503	0.000337034	0.00315011	901.535	1020.23	988.127	1327.44	1619.95	1510.16
b0157	yadS	65.3393	0.0315286	0.301381	0.104614	0.916682	0.956676	63.4576	51.7435	79.008	56.4188	68.1877	73.22
b0158	btuF	261.013	1.11359	0.22631	4.92066	8.62542e-07	1.66758e-05	203.502	147.42	144.321	368.319	355.55	346.963
b0159	mtn	2420.32	0.854311	0.17522	4.87564	1.08455e-06	1.99651e-05	1799.79	1804.19	1567.52	3146.68	3423.02	2780.7
b0160	dgt	825.168	0.967636	0.176089	5.49515	3.90368e-08	1.0595e-06	557.989	544.771	572.018	1166.7	1160.17	949.365
b0161	degP	2530.82	0.988523	0.332353	2.97432	0.0029364	0.0183644	1754.93	1675.32	1658.11	3064.71	4891.01	2140.85
b0162	cdaR	828.777	0.603258	0.322841	1.86859	0.0616799	0.187475	459.52	812.275	701.591	1227.38	1053.01	718.888
b0163	yaeH	3413.47	0.950779	0.169068	5.62365	1.86967e-08	5.38515e-07	2536.11	2322.6	2124.79	4075.99	4644.56	4776.78
b0164	yaeI	118.783	1.24731	0.227881	5.47349	4.41265e-08	1.16045e-06	77.6808	69.3167	64.2599	166.063	177.288	158.089
b0166	dapD	5240.97	0.519221	0.194671	2.66717	0.00764933	0.0388336	4206.8	4406.98	4309.62	6011.27	7283.42	5227.75
b0167	glnD	2083.45	0.912441	0.150354	6.06861	1.2902e-09	5.20257e-08	1478.12	1402.93	1455.85	2895.46	2777.19	2491.15
b0168	map	4397.93	0.0903033	0.155126	0.58213	0.560479	0.754313	3928.9	4550.5	4301.2	4449.64	4859.84	4297.52
b0169	rpsB	3536.88	0.301623	0.249913	1.20692	0.227464	0.454285	2575.5	3423.86	3505.85	3520.32	4855.94	3339.83
b0170	tsf	2460.4	0.574143	0.356408	1.61092	0.107198	0.273255	1364.34	2169.32	2397.63	2591.01	4157.5	2082.61
b0171	pyrH	1022.34	0.857663	0.151884	5.64684	1.63424e-08	4.83873e-07	760.397	724.409	696.324	1349.79	1372.52	1230.6
b0172	frr	7526.45	0.761437	0.200233	3.80275	0.000143096	0.00149229	6463.92	5389.13	4902.71	9464.52	8428	10510.4
b0173	dxr	1358.54	0.913609	0.191006	4.78315	1.72565e-06	3.04434e-05	1004.38	915.762	907.012	1636.15	1611.18	2076.79
b0174	ispU	784.595	0.626447	0.192897	3.24758	0.0011639	0.00863977	611.6	668.76	569.911	927.185	1088.08	842.031
b0175	cdsA	371.83	0.292256	0.182764	1.59909	0.109801	0.277849	310.723	374.896	317.086	389.609	427.634	411.031
b0176	rseP	1689.26	0.73456	0.160178	4.58589	4.52057e-06	6.98544e-05	1328.23	1143.24	1333.66	2033.21	2234.61	2062.64
b0177	bamA	7882.1	0.877028	0.196805	4.45632	8.33785e-06	0.000121733	6030.66	5337.39	5304.07	10946.3	11248.1	8426.13
b0178	skp	4652.91	0.900651	0.238361	3.77851	0.00015777	0.00163324	2875.28	3520.51	3341.51	6546.71	7033.08	4600.38
b0179	lpxD	4206.14	0.760371	0.131887	5.76534	8.14918e-09	2.61391e-07	3161.94	3119.25	3086.58	5439.63	5418	5011.41
b0180	fabZ	1170.47	-0.0432269	0.175559	-0.246225	0.805508	0.906499	1338.08	1185.22	1040.8	1174.15	1128.02	1156.54
b0181	lpxA	4395.39	0.465858	0.135067	3.44909	0.000562488	0.00480156	3718.83	3797.78	3558.52	5361.92	5019.59	4915.73
b0182	lpxB	687.576	0.602174	0.237211	2.53856	0.0111311	0.0521917	428.886	563.321	645.759	895.25	870.855	721.384
b0183	rnhB	136.913	0.497213	0.2678	1.85666	0.0633593	0.190701	96.2805	124.965	119.039	157.547	193.848	129.799
b0184	dnaE	2367.04	1.23263	0.13463	9.15571	5.40004e-20	9.14551e-18	1435.45	1359.98	1444.27	3410.68	3202.88	3348.99
b0185	accA	1273.93	1.04069	0.203556	5.11252	3.17886e-07	6.97372e-06	815.102	848.398	836.432	1646.79	2046.61	1450.26
b0186	ldcC	7932.71	0.959502	0.323677	2.96438	0.00303295	0.0188292	7621.47	4316.19	4226.4	11076.2	8124.08	12231.9
b0187	yaeR	1218.41	0.840578	0.302429	2.77942	0.00544563	0.029636	1182.72	702.93	734.248	1655.31	1220.56	1814.69
b0188	tilS	814.779	0.920939	0.217685	4.2306	2.33069e-05	0.000300858	693.657	494.98	501.438	997.442	1109.51	1091.64
b0189	rof	1552.76	1.27355	0.276142	4.61195	3.98902e-06	6.30205e-05	1149.9	750.769	825.897	2184.37	1739.76	2665.88
b0190	yaeQ	356.428	0.312812	0.174313	1.79455	0.0727257	0.210328	301.971	311.437	340.261	388.545	422.764	373.589
b0191	arfB	248.91	1.30465	0.202248	6.45073	1.11309e-10	5.06755e-09	141.138	139.61	149.589	389.609	310.741	362.772
b0192	nlpE	1100.37	1.24484	0.209212	5.95014	2.67916e-09	9.95049e-08	757.115	648.258	554.11	1512.66	1402.72	1727.33
b0193	yaeF	161.881	0.648975	0.280859	2.31068	0.0208506	0.0843183	111.598	146.444	120.092	218.224	146.117	228.813
b0194	proS	3050.42	1.07774	0.192704	5.59272	2.23546e-08	6.35229e-07	2090.82	1928.18	1864.59	3998.28	4834.51	3586.12
b0195	trmO	194.21	1.64021	0.228499	7.17819	7.06404e-13	4.33466e-11	87.5277	84.9374	110.611	319.352	264.958	297.872
b0196	rcsF	286.341	0.986683	0.268249	3.67823	0.000234856	0.00230715	195.843	158.159	222.276	350.223	475.366	316.177
b0197	metQ	3441.03	-0.0786779	0.399584	-0.196899	0.843906	0.925646	5597.4	2686.76	2320.73	3198.84	2588.21	4254.25
b0198	metI	318.917	-0.134086	0.335941	-0.399137	0.689792	0.840455	442.015	289.959	269.681	286.352	221.123	404.374
b0199	metN	553.474	-0.137676	0.380275	-0.362042	0.71732	0.858433	675.057	519.387	545.682	438.577	323.405	818.733
b0200	gmhB	2352.16	0.793374	0.169788	4.67272	2.9723e-06	4.8778e-05	1590.82	1770.02	1802.44	3321.26	2730.43	2898.02
b0201	rrsH	264.72	1.17818	0.670037	1.75839	0.0786818	0.221797	66.7399	205.021	214.902	163.934	758.832	178.89
b0202	ileV	0.175573	-1.08951	4.08047	-0.267006	0.789465	NA	0	0	1.05344	0	0	0
b0203	alaV	2.4786	0.153236	1.6917	0.0905813	0.927825	NA	0	4.88146	2.10688	1.06451	6.81877	0
b0204	rrlH	103.057	1.09333	0.626477	1.74521	0.080949	0.225472	24.0701	75.1745	97.9699	80.9025	256.191	84.0366
b0205	rrfH	1.49239	0.999602	2.06407	0.484287	0.628182	NA	0	2.92888	0	2.12901	3.89644	0
b0206	aspU	10.2746	0.66766	0.8602	0.776168	0.43765	0.659825	1.0941	5.85775	16.855	8.51605	18.5081	10.8166
b0207	dkgB	205.196	1.32378	0.234855	5.63658	1.73457e-08	5.03024e-07	113.786	128.871	108.504	282.094	345.809	252.11
b0208	yafC	405.896	0.507395	0.172085	2.94851	0.00319311	0.0195937	334.793	348.536	322.353	500.318	433.479	495.899
b0209	yafD	4431.2	0.774045	0.246781	3.13656	0.0017094	0.0119039	3707.89	3193.45	2909.6	5623.79	4311.41	6841.08
b0210	yafE	310.484	1.46444	0.202216	7.24195	4.42269e-13	2.97233e-11	149.891	170.851	174.871	406.641	453.935	506.716
b0211	mltD	859.218	0.999942	0.248074	4.03081	5.55842e-05	0.000643016	477.026	611.159	629.957	1090.05	1408.56	938.548
b0212	gloB	1221.97	0.945417	0.202553	4.66751	3.04866e-06	4.98379e-05	723.198	909.904	872.249	1762.82	1683.26	1380.36
b0213	yafS	503.415	0.556643	0.199387	2.79178	0.00524198	0.0287867	359.958	413.948	448.766	567.382	552.321	678.118
b0214	rnhA	283.332	0.45941	0.26082	1.76141	0.0781698	0.220647	211.161	293.864	210.688	335.319	267.88	381.077
b0215	dnaQ	1179.99	0.934253	0.200619	4.65685	3.21089e-06	5.20877e-05	795.408	825.943	811.149	1516.92	1303.36	1827.17
b0216	aspV	36.8844	1.0713	0.430947	2.48591	0.012922	0.0583282	14.2232	27.3362	29.4963	64.9349	48.7055	36.61
b0217	yafT	23.4014	1.22739	0.456588	2.68818	0.00718431	0.0367372	19.6937	7.81034	14.7482	29.8062	35.068	33.2818
b0218	yafU	0.138674	0.834044	4.08047	0.204399	0.838042	NA	0	0	0	0	0	0.832046
b0219	yafV	899.916	0.108975	0.166874	0.653038	0.513732	0.718342	935.452	845.469	817.47	885.669	896.182	1019.26
b0220	ivy	6572.77	-0.0831558	0.23435	-0.354837	0.722712	0.860507	5020.81	7371.98	7893.43	6515.84	6207.03	6427.56
b0221	fadE	8995.32	-3.56675	0.613335	-5.81534	6.05094e-09	2.00154e-07	27833.8	12101.1	9837.02	1376.41	436.401	2387.14
b0222	gmhA	2498.75	-0.595127	0.155275	-3.83273	0.00012673	0.00133809	3129.11	3120.23	2771.6	1870.34	2128.43	1972.78
b0223	yafJ	532.391	-0.149964	0.216518	-0.692615	0.488551	0.698591	609.412	540.866	529.88	444.964	610.767	458.457
b0224	dpaA	146.671	-0.171958	0.219788	-0.782383	0.43399	0.65702	150.985	139.61	175.925	133.063	131.505	148.936
b0225	yafQ	83.31	-0.0530555	0.267521	-0.198323	0.842792	0.924931	83.1513	82.9848	88.489	89.4185	64.2913	91.5251
b0226	dinJ	671.627	0.24952	0.205207	1.21594	0.224007	0.450781	595.188	588.704	657.347	783.477	597.13	807.917
b0227	yafL	105.646	0.473757	0.531906	0.890678	0.373102	0.605487	144.421	64.4353	56.8858	89.4185	74.0324	204.683
b0228	rayT	339.433	-0.254763	0.180253	-1.41337	0.157548	0.352569	392.781	348.536	366.597	336.384	284.44	307.857
b0229	lfhA	223.437	-0.111398	0.331013	-0.336537	0.736466	0.870276	280.089	179.638	237.024	190.547	158.78	294.544
b0230	lafU	40.9853	-0.276546	0.447213	-0.618377	0.536327	0.734414	21.8819	52.7198	60.0461	31.9352	41.8867	37.4421
b0231	dinB	712.99	-0.130984	0.242977	-0.539079	0.589833	0.771502	756.02	743.935	736.355	717.477	504.589	819.565
b0232	yafN	78.9175	-0.193906	0.286909	-0.675844	0.49914	0.707359	107.221	76.1508	69.5271	69.1929	74.0324	77.3803
b0233	yafO	20.8927	-0.23873	0.53581	-0.445549	0.655923	0.821407	24.0701	29.2888	14.7482	11.7096	15.5858	29.9537
b0234	yafP	17.7969	0.427714	0.561184	0.762162	0.445963	0.664092	24.0701	6.83405	14.7482	19.1611	25.3269	16.6409
b0235	ykfJ	0.162715	-1.08951	4.08047	-0.267006	0.789465	NA	0	0.976292	0	0	0	0
b0236	prfH	5.80982	-0.218494	1.25333	-0.17433	0.861606	0.93088	0	3.90517	14.7482	10.6451	3.89644	1.66409
b0237	pepD	8402.13	0.0277042	0.175456	0.157898	0.874537	0.936941	9045.99	7549.67	8368.53	8817.3	9107.93	7523.36
b0238	gpt	66.1074	-0.0597763	0.413674	-0.144501	0.885105	0.941889	50.3284	70.293	82.1683	38.3222	62.3431	93.1892
b0239	frsA	1150.04	-0.197179	0.136386	-1.44574	0.14825	0.338925	1205.69	1225.25	1254.65	1041.09	1102.69	1070.84
b0240	crl	2759	-1.88237	0.28686	-6.56198	5.30962e-11	2.52595e-09	3792.14	4900.99	4328.59	1480.73	802.667	1248.9
b0241	phoE	17.7314	-0.831436	0.474553	-1.75204	0.0797672	0.223776	17.5055	29.2888	21.0688	14.9031	13.6375	9.98455
b0242	proB	541.432	0.445897	0.237344	1.87869	0.0602866	0.184432	490.155	450.071	435.071	530.124	789.029	554.143
b0243	proA	716.791	0.385273	0.206915	1.86199	0.0626049	0.1892	729.762	600.42	535.148	731.316	856.243	847.855
b0244	thrW	32.7227	-0.847592	0.668524	-1.26785	0.20485	0.425774	16.4114	49.7909	60.0461	8.51605	39.9385	21.6332
b0245	ykfI	0	NA	NA	NA	NA	NA	0	0	0	0	0	0
b0246	yafW	0	NA	NA	NA	NA	NA	0	0	0	0	0	0
b0247	ykfG	0	NA	NA	NA	NA	NA	0	0	0	0	0	0
b0248	yafX	0	NA	NA	NA	NA	NA	0	0	0	0	0	0
b0249	ykfF	0	NA	NA	NA	NA	NA	0	0	0	0	0	0
b0250	ykfB	0	NA	NA	NA	NA	NA	0	0	0	0	0	0
b0251	yafY	0	NA	NA	NA	NA	NA	0	0	0	0	0	0
b0252	yafZ	0	NA	NA	NA	NA	NA	0	0	0	0	0	0
b0253	ykfA	0	NA	NA	NA	NA	NA	0	0	0	0	0	0
b0254	perR	0	NA	NA	NA	NA	NA	0	0	0	0	0	0
b0256	insI1	0	NA	NA	NA	NA	NA	0	0	0	0	0	0
b0258	ykfC	7.09889	0.474441	0.787728	0.60229	0.546981	0.742281	4.37638	4.88146	8.42752	14.9031	5.84466	4.16023
b0259	insH1	1.4918	-1.13689	1.50733	-0.754242	0.450704	NA	2.18819	2.92888	1.05344	0	1.94822	0.832046
b0260	mmuP	0	NA	NA	NA	NA	NA	0	0	0	0	0	0
b0261	mmuM	0	NA	NA	NA	NA	NA	0	0	0	0	0	0
b0262	afuC	0	NA	NA	NA	NA	NA	0	0	0	0	0	0
b0263	afuB	0	NA	NA	NA	NA	NA	0	0	0	0	0	0
b0264	insB2	0	NA	NA	NA	NA	NA	0	0	0	0	0	0
b0265	insA2	0	NA	NA	NA	NA	NA	0	0	0	0	0	0
b0266	yagB	0	NA	NA	NA	NA	NA	0	0	0	0	0	0
b0267	yagA	0	NA	NA	NA	NA	NA	0	0	0	0	0	0
b0268	yagE	0	NA	NA	NA	NA	NA	0	0	0	0	0	0
b0269	yagF	0	NA	NA	NA	NA	NA	0	0	0	0	0	0
b0270	yagG	0	NA	NA	NA	NA	NA	0	0	0	0	0	0
b0271	yagH	0	NA	NA	NA	NA	NA	0	0	0	0	0	0
b0272	xynR	0	NA	NA	NA	NA	NA	0	0	0	0	0	0
b0273	argF	0	NA	NA	NA	NA	NA	0	0	0	0	0	0
b0274	insB3	0.175573	-1.08951	4.08047	-0.267006	0.789465	NA	0	0	1.05344	0	0	0
b0275	insA3	0.695848	-1.63574	2.42475	-0.674604	0.499927	NA	1.0941	0	2.10688	0	0.97411	0
b0276	yagJ	0	NA	NA	NA	NA	NA	0	0	0	0	0	0
b0277	yagK	0	NA	NA	NA	NA	NA	0	0	0	0	0	0
b0278	yagL	0	NA	NA	NA	NA	NA	0	0	0	0	0	0
b0279	yagM	0	NA	NA	NA	NA	NA	0	0	0	0	0	0
b0280	yagN	0	NA	NA	NA	NA	NA	0	0	0	0	0	0
b0281	intF	0	NA	NA	NA	NA	NA	0	0	0	0	0	0
b0282	yagP	80.063	-0.40781	0.334493	-1.21919	0.222774	0.449296	78.7749	83.9611	111.665	53.2253	60.3948	92.3571
b0283	paoD	127.321	0.297901	0.362113	0.822674	0.410693	0.638588	134.574	93.7241	114.825	127.741	92.5405	200.523
b0284	paoC	285.152	0.83436	0.373153	2.23598	0.0253534	0.0979436	291.03	164.017	160.123	341.706	258.139	495.899
b0285	paoB	125.319	0.800736	0.447798	1.78817	0.0737494	0.212174	145.515	73.2219	55.8323	137.321	117.867	222.156
b0286	paoA	113.82	0.653758	0.477766	1.36836	0.171199	0.374233	124.727	68.3405	72.6874	120.289	73.0583	223.82
b0287	yagU	297.711	-0.06503	0.215558	-0.301682	0.762895	0.885984	275.712	324.129	312.872	302.32	328.275	242.957
b0288	ykgJ	4.58937	-0.639241	1.0408	-0.61418	0.539096	0.736351	6.56458	1.95258	8.42752	2.12901	0.97411	7.48841
b0289	ecpE	111.764	-0.483828	0.293032	-1.65111	0.098716	0.259781	135.668	109.345	146.428	91.5475	71.1101	116.486
b0290	ecpD	225.172	-0.359549	0.252893	-1.42174	0.155101	0.348558	300.876	216.737	242.291	176.708	177.288	237.133
b0291	ecpC	110.764	-0.299523	0.303344	-0.987403	0.323445	0.558283	131.292	140.586	94.8096	110.709	74.0324	113.158
b0292	ecpB	7.77018	-0.0139542	0.864534	-0.0161407	0.987122	0.994166	15.3173	3.90517	4.21376	12.7741	2.92233	7.48841
b0293	ecpA	243.806	0.893968	0.301815	2.96197	0.0030568	0.0189495	118.162	197.211	195.94	370.448	327.301	253.774
b0294	matA	2.15803	1.13718	1.54142	0.737751	0.460666	NA	0	1.95258	2.10688	0	3.89644	4.99228
b0295	ykgL	6.25052	-0.271709	0.735378	-0.369483	0.711768	0.855481	4.37638	9.76292	6.32064	4.25802	7.79288	4.99228
b0296	ykgM	4.9145	1.37705	0.961549	1.43211	0.152111	0.344906	1.0941	4.88146	2.10688	6.38704	11.6893	3.32818
b0297	eaeH	3.57072	0.128823	1.13049	0.113953	0.909275	NA	0	3.90517	6.32064	4.25802	1.94822	4.99228
b0298	insE1	0.975041	0.825658	1.75856	0.469508	0.638706	NA	1.0941	0	1.05344	1.06451	0.97411	1.66409
b0299	insF1	2.14397	-0.830212	1.25889	-0.659477	0.509589	NA	2.18819	2.92888	3.16032	0	2.92233	1.66409
b0300	ykgA	71.4629	0.383077	0.303585	1.26184	0.207005	0.428586	65.6458	74.1982	46.3514	71.3219	78.9029	92.3571
b0301	rclC	2.79463	1.68762	1.43916	1.17264	0.240939	NA	0	3.90517	0	4.25802	1.94822	6.65637
b0303	rclB	0.808079	1.75215	2.35689	0.743415	0.45723	NA	1.0941	0	0	0	2.92233	0.832046
b0304	rclA	375.482	0.638088	0.262094	2.43457	0.0149094	0.0646124	382.934	233.334	265.467	466.254	413.997	490.907
b0305	rclR	49.4126	0.657276	0.412132	1.59482	0.110753	0.279789	52.5166	33.1939	29.4963	42.5802	83.7735	54.915
b0306	ykgE	35.1226	0.232384	0.437837	0.530754	0.595589	0.7752	19.6937	34.1702	43.1911	29.8062	33.1198	50.7548
b0307	ykgF	107.848	0.596947	0.318448	1.87455	0.0608547	0.185767	92.9982	78.1034	86.3821	114.967	177.288	97.3494
b0308	ykgG	32.1504	0.301175	0.530138	0.568108	0.569962	0.760787	12.0351	34.1702	40.0307	32.9997	48.7055	24.9614
b0310	ykgH	3.2296	2.42778	1.57709	1.5394	0.123706	NA	0	1.95258	1.05344	6.38704	0	9.98455
b0311	betA	2545.16	-1.48779	0.359667	-4.13657	3.52542e-05	0.000426475	3503.3	3950.08	3803.97	1561.63	707.204	1744.8
b0312	betB	4746.59	-1.51157	0.32954	-4.58691	4.49864e-06	6.97701e-05	6788.87	7335.86	6960.08	2828.39	1421.23	3145.13
b0313	betI	3059.53	-1.73262	0.352256	-4.91863	8.7154e-07	1.67732e-05	4235.25	5317.86	4558.24	1598.89	783.185	1863.78
b0314	betT	1871.81	-1.61765	0.273374	-5.91735	3.27172e-09	1.17394e-07	2350.12	3172.95	2947.53	1058.12	654.602	1047.55
b0315	pdeL	28.4216	0.377806	0.45711	0.826511	0.408514	0.63637	32.8229	20.5021	21.0688	19.1611	42.8609	34.1139
b0316	yahB	117.119	-0.666968	0.247765	-2.69193	0.00710394	0.0364141	124.727	148.396	158.016	79.838	105.204	86.5328
b0317	yahC	14.2924	-0.838959	0.668604	-1.25479	0.209555	0.431754	6.56458	29.2888	18.9619	10.6451	13.6375	6.65637
b0318	yahD	234.585	-1.05224	0.268979	-3.91196	9.15487e-05	0.0010016	260.395	366.11	322.353	188.418	147.091	123.143
b0319	yahE	27.804	-1.67089	0.543019	-3.07704	0.00209068	0.0139182	26.2583	49.7909	50.5651	14.9031	19.4822	5.82432
b0320	yahF	73.8233	-0.952822	0.247681	-3.84698	0.000119583	0.00126896	96.2805	96.6529	99.0234	51.0963	51.6279	48.2587
b0321	yahG	195.84	-0.0455437	0.252849	-0.180122	0.857057	0.928679	242.889	181.59	172.764	186.289	168.521	222.988
b0322	yahH	110.258	0.0112123	0.316887	0.0353827	0.971775	0.986453	124.727	108.368	96.9165	90.483	89.6182	151.432
b0323	yahI	37.4271	-0.375306	0.446582	-0.840395	0.400687	0.629686	52.5166	30.2651	44.2445	19.1611	46.7573	31.6177
b0324	yahJ	272.396	-0.0460237	0.180449	-0.255052	0.798683	0.90297	266.959	275.314	287.589	292.739	257.165	254.606
b0325	yahK	3811.2	0.476856	0.182857	2.60781	0.0091124	0.0447586	3311.83	2990.38	3259.34	4383.64	3856.5	5065.5
b0326	yahL	4.34001	-0.273028	1.14687	-0.238064	0.811831	0.910189	4.37638	7.81034	2.10688	4.25802	0	7.48841
b0327	yahM	44.8924	-0.338851	0.339175	-0.999043	0.317774	0.551814	41.5757	53.6961	54.7789	51.0963	34.0939	34.1139
b0328	yahN	119.266	-0.0440273	0.234825	-0.18749	0.851276	0.926709	129.103	120.084	113.772	137.321	107.152	108.166
b0329	yahO	9002.93	1.87353	0.398691	4.6992	2.6118e-06	4.42335e-05	4826.06	3577.13	3178.23	11234.8	8737.77	22463.6
b0330	prpR	578.84	-1.63606	0.403528	-4.05439	5.02651e-05	0.000589487	1147.71	799.583	680.522	340.642	145.142	359.444
b0331	prpB	27.5864	-0.219671	0.505136	-0.434875	0.663653	0.826145	13.1292	39.0517	36.8704	23.4191	21.4304	31.6177
b0333	prpC	28.4352	-0.219108	0.389517	-0.562513	0.573766	0.763459	35.0111	31.2414	25.2826	34.0642	23.3786	21.6332
b0334	prpD	36.2642	0.0631189	0.447258	0.141124	0.887772	0.94348	51.4225	37.0991	17.9085	40.4512	34.0939	36.61
b0335	prpE	57.9716	0.170944	0.27475	0.622178	0.533825	0.732647	50.3284	57.6012	55.8323	56.4188	59.4207	68.2278
b0336	codB	68.0388	0.174777	0.316639	0.551975	0.580965	0.76869	65.6458	57.6012	68.4736	62.8059	95.4628	58.2432
b0337	codA	393.482	0.0579254	0.190498	0.304073	0.761072	0.885026	369.804	432.497	353.956	410.899	427.634	366.1
b0338	cynR	64.8055	-0.0463307	0.305484	-0.151663	0.879453	0.940304	50.3284	75.1745	71.6339	70.2574	68.1877	53.2509
b0339	cynT	42.7266	-0.607543	0.387576	-1.56755	0.116987	0.291195	56.893	57.6012	40.0307	46.8383	23.3786	31.6177
b0340	cynS	34.1771	-0.386877	0.495768	-0.780358	0.43518	0.657973	26.2583	63.459	26.336	23.4191	38.9644	26.6255
b0341	cynX	44.9082	0.0985343	0.34693	0.284018	0.776397	0.894357	43.7638	55.6487	30.5498	50.0318	42.8609	46.5946
b0342	lacA	27.8311	0.723102	0.459713	1.57294	0.115732	0.288751	30.6347	13.6681	18.9619	35.1287	25.3269	43.2664
b0343	lacY	26.7116	0.0190899	0.398378	0.0479189	0.961781	0.98092	26.2583	30.2651	23.1757	19.1611	33.1198	28.2896
b0344	lacZ	369.71	0.389588	0.297999	1.30734	0.191096	0.405971	263.677	326.082	370.811	386.416	314.638	556.639
b0345	lacI	1255.67	-2.46534	0.288892	-8.53378	1.41648e-17	1.76393e-15	1664.12	2428.04	2287.02	418.351	274.699	461.786
b0346	mhpR	2281.01	-3.51073	0.473973	-7.40703	1.29161e-13	9.59418e-12	3470.47	4908.8	4203.23	416.222	137.35	549.982
b0347	mhpA	45.2142	-0.837588	0.440504	-1.90143	0.0572458	0.177827	59.0812	68.3405	46.3514	46.8383	16.5599	34.1139
b0348	mhpB	14.4517	-1.35859	0.652801	-2.08116	0.0374191	0.130612	17.5055	17.5733	27.3894	10.6451	1.94822	11.6486
b0349	mhpC	42.2437	-0.291211	0.359503	-0.810038	0.417918	0.642741	45.952	51.7435	42.1376	30.8707	31.1715	51.5869
b0350	mhpD	30.1407	-0.0927775	0.618241	-0.150067	0.880712	0.940937	47.0461	27.3362	18.9619	43.6448	9.7411	34.1139
b0351	mhpF	80.9327	0.0743663	0.517933	0.143583	0.88583	0.941889	110.504	39.0517	87.4355	52.1608	63.3172	133.127
b0352	mhpE	76.7595	-0.123081	0.375073	-0.328153	0.742796	0.875312	86.4336	80.056	73.7408	86.225	40.9126	93.1892
b0353	mhpT	83.5268	-0.145945	0.255295	-0.571671	0.567545	0.759906	85.3395	92.7478	85.3287	79.838	67.2136	90.693
b0354	yaiL	436.178	-0.140278	0.173878	-0.806763	0.419803	0.643535	421.227	459.834	490.903	437.512	385.748	421.847
b0355	frmB	165.336	-0.276231	0.37807	-0.730635	0.465002	0.680383	102.845	228.452	211.741	144.773	186.055	118.151
b0356	frmA	1417.9	0.348955	0.168596	2.06976	0.0384745	0.133307	1179.44	1269.18	1292.57	1670.21	1693.98	1402
b0357	frmR	131.475	0.0765984	0.245327	0.31223	0.754866	0.881097	126.915	107.392	149.589	151.16	125.66	128.135
b0358	yaiO	76.6661	-0.00205636	0.477533	-0.00430622	0.996564	0.998214	107.221	66.3879	56.8858	72.3864	38.9644	118.151
b0360	insC1	0	NA	NA	NA	NA	NA	0	0	0	0	0	0
b0361	insD1	0	NA	NA	NA	NA	NA	0	0	0	0	0	0
b0363	yaiP	15.9485	-0.470057	0.652162	-0.720766	0.471053	0.68561	24.0701	10.7392	21.0688	4.25802	15.5858	19.9691
b0364	yaiS	1.91378	4.31907	1.65833	2.60447	0.00920158	NA	0	0	0	4.25802	3.89644	3.32818
b0365	tauA	49.7524	-1.62691	1.60337	-1.01469	0.310256	0.545751	207.878	15.6207	2.10688	8.51605	13.6375	50.7548
b0366	tauB	27.3852	-2.08436	0.965401	-2.15906	0.0308453	0.112682	111.598	7.81034	13.6947	4.25802	13.6375	13.3127
b0367	tauC	11.9875	0.15071	0.836433	0.180182	0.85701	0.928679	25.1642	4.88146	4.21376	11.7096	6.81877	19.1371
b0368	tauD	119.275	-0.818037	0.448564	-1.82368	0.0682001	0.201003	231.948	100.558	124.306	104.322	49.6796	104.838
b0369	hemB	8890.07	-1.00352	0.286079	-3.50782	0.000451789	0.0040271	9211.2	13353.7	13023.7	6143.26	7296.09	4312.49
b0372	insF2	0	NA	NA	NA	NA	NA	0	0	0	0	0	0
b0373	insE2	0	NA	NA	NA	NA	NA	0	0	0	0	0	0
b0375	iprA	2.93585	2.88546	1.41518	2.03893	0.0414567	NA	0	0	2.10688	7.45154	3.89644	4.16023
b0376	ampH	558.051	1.71948	0.270275	6.36197	1.99185e-10	8.78488e-09	243.983	314.366	221.222	781.347	1079.31	708.071
b0377	sbmA	123.51	0.280035	0.278628	1.00505	0.314873	0.549762	106.127	118.131	110.611	139.45	100.333	166.409
b0378	yaiW	216.962	-0.0282158	0.265659	-0.106211	0.915415	0.956377	233.042	210.879	213.848	201.192	166.573	276.239
b0379	yaiY	38.8762	-1.23972	0.515081	-2.40683	0.0160914	0.0681994	74.3985	52.7198	36.8704	28.7417	9.7411	30.7857
b0380	yaiZ	404.653	-1.74797	0.263065	-6.64466	3.03915e-11	1.49625e-09	576.589	606.277	687.896	225.675	133.453	198.027
b0381	ddlA	1285.71	-0.608663	0.154866	-3.93026	8.48535e-05	0.000935598	1478.12	1609.91	1570.68	976.152	1107.56	971.83
b0382	iraP	393.491	0.273774	0.382734	0.715312	0.474416	0.688909	446.391	329.01	293.91	326.803	300.026	664.805
b0383	phoA	229.525	0.345938	0.232099	1.49047	0.1361	0.320999	249.454	184.519	172.764	252.288	249.372	268.751
b0384	psiF	1915.16	0.533467	0.325487	1.63898	0.101217	0.263563	1994.54	1398.05	1303.11	1852.24	1778.73	3164.27
b0385	dgcC	35.6515	0.362232	0.441379	0.820682	0.411827	0.638943	44.8579	18.5496	30.5498	29.8062	41.8867	48.2587
b0386	proC	840.493	0.596668	0.217204	2.74704	0.00601364	0.031846	782.279	584.799	640.492	949.539	1168.93	916.915
b0387	yaiI	456.14	-0.383586	0.243203	-1.57722	0.114744	0.286623	473.744	566.249	509.865	312.965	384.774	489.243
b0388	aroL	237.278	-0.730524	0.246259	-2.96648	0.0030123	0.0187284	304.159	281.172	302.337	203.321	198.719	133.959
b0389	yaiA	7696.16	0.0502651	0.261383	0.192304	0.847504	0.925995	8380.78	7100.57	7205.53	7363.19	5945.97	10180.9
b0390	aroM	232.046	0.585751	0.235143	2.49104	0.012737	0.0577394	168.491	189.401	199.1	221.417	306.845	307.025
b0391	ppnP	1721.38	-0.134588	0.160093	-0.840685	0.400524	0.629686	1706.79	1995.54	1702.36	1572.28	1710.54	1640.79
b0392	ykiA	27.6477	0.716956	0.639145	1.12174	0.261972	0.492318	24.0701	28.3125	10.5344	13.8386	29.2233	59.9073
b0393	rdgC	150.373	0.244489	0.247126	0.989332	0.322501	0.557334	135.668	157.183	120.092	139.45	190.926	158.921
b0394	mak	607.869	-0.0661967	0.256757	-0.257819	0.796547	0.901759	778.996	563.321	523.56	487.544	667.266	626.531
b0396	araJ	205.505	0.431851	0.280301	1.54067	0.123397	0.301158	192.561	160.112	172.764	213.966	184.107	309.521
b0397	sbcC	288.175	0.0785138	0.243884	0.321931	0.747505	0.878565	269.148	254.812	317.086	255.481	366.266	266.255
b0398	sbcD	214.515	0.212182	0.235052	0.902703	0.366684	0.598885	192.561	191.353	212.795	180.966	258.139	251.278
b0399	phoB	124.021	-0.172826	0.225945	-0.764906	0.444328	0.662891	144.421	113.25	136.947	110.709	119.816	118.983
b0400	phoR	136.957	0.0252892	0.336266	0.0752058	0.940051	0.969674	125.821	138.633	143.268	114.967	99.3593	199.691
b0401	brnQ	1666.64	0.03872	0.20014	0.193465	0.846595	0.925745	1717.73	1576.71	1639.15	1441.34	1618	2006.89
b0402	proY	227.406	-0.278223	0.266737	-1.04306	0.29692	0.532695	264.771	253.836	229.65	146.902	239.631	229.645
b0403	malZ	415.45	0.414595	0.336371	1.23255	0.217743	0.443446	322.758	364.157	381.345	413.028	693.567	317.842
b0404	acpH	188.976	0.40265	0.27325	1.47356	0.1406	0.327317	168.491	193.306	126.413	238.449	173.392	233.805
b0405	queA	124.597	0.167623	0.272939	0.61414	0.539123	0.736351	122.539	110.321	119.039	127.741	165.599	102.342
b0406	tgt	410.276	-0.0738873	0.433329	-0.170511	0.864608	0.931489	258.207	494.98	508.812	393.867	584.466	221.324
b0407	yajC	1094.4	-0.157369	0.168668	-0.93301	0.350815	0.584091	1068.93	1168.62	1224.1	1043.22	1122.18	939.38
b0408	secD	1111.42	-0.411983	0.186707	-2.20657	0.027344	0.10337	1233.05	1331.66	1242.01	917.604	1104.64	839.534
b0409	secF	1080.56	-0.289038	0.189393	-1.52613	0.126977	0.306686	1322.76	1167.65	1075.56	861.185	982.877	1073.34
b0410	yajD	492.841	0.206955	0.214048	0.966862	0.333613	0.568921	445.297	453	474.048	514.156	631.224	439.32
b0411	tsx	5052.04	-2.04852	0.340235	-6.0209	1.73447e-09	6.55691e-08	4872.01	9550.09	9988.72	2188.62	2175.19	1537.62
b0412	yajI	150.979	-0.261363	0.340483	-0.767625	0.44271	0.661439	187.09	138.633	168.55	138.386	87.6699	185.546
b0413	nrdR	893.449	-0.46158	0.152413	-3.02848	0.00245786	0.0158637	1039.39	1063.18	1002.88	787.735	694.541	772.971
b0414	ribD	2012.65	-0.295783	0.158088	-1.871	0.0613454	0.186592	2296.51	2260.12	2098.45	1824.56	1644.3	1951.98
b0415	ribE	1485.27	-0.738987	0.207595	-3.55975	0.000371202	0.00339454	1633.49	1909.63	2028.93	1312.54	1005.28	1021.75
b0416	nusB	861.751	-0.712289	0.181815	-3.91766	8.9411e-05	0.000980741	1080.97	1145.19	983.913	733.445	637.068	589.921
b0417	thiL	373.907	-0.67954	0.169529	-4.00841	6.11297e-05	0.000692041	466.085	449.094	465.621	312.965	271.777	277.903
b0418	pgpA	560.954	-0.250989	0.21133	-1.18766	0.234966	0.462289	636.764	573.084	619.423	532.253	415.945	588.257
b0419	yajO	6541.78	0.027975	0.233012	0.120058	0.904437	0.951708	7924.54	5625.4	5885.57	6824.55	5590.42	7400.22
b0420	dxs	1541.62	-0.0368003	0.187623	-0.196139	0.844501	0.925646	1589.72	1572.81	1521.17	1409.41	1790.41	1366.22
b0421	ispA	463.343	0.00223529	0.255115	0.00876189	0.993009	0.997041	470.461	459.834	458.247	473.705	576.673	341.139
b0422	xseB	384.202	-0.419552	0.194564	-2.15637	0.0310549	0.113253	448.579	392.469	478.262	298.062	363.343	324.498
b0423	thiI	376.702	0.00573691	0.20618	0.0278247	0.977802	0.989487	421.227	346.584	360.277	338.513	432.505	361.108
b0424	yajL	1066.92	0.0916279	0.199367	0.459593	0.645808	0.81303	1214.45	1007.53	877.516	1073.02	1066.65	1162.37
b0425	panE	1565.52	-0.0369137	0.191475	-0.192786	0.847127	0.925995	1820.58	1594.29	1342.08	1498.82	1509.87	1627.48
b0426	yajQ	1020.7	-0.119599	0.320603	-0.373042	0.709117	0.854621	749.456	1230.13	1209.35	723.864	1271.21	940.212
b0427	yajR	107.382	0.219737	0.221813	0.990639	0.321862	0.557242	102.845	92.7478	102.184	109.644	123.712	113.158
b0428	cyoE	6389.86	-1.00729	0.520296	-1.936	0.0528672	0.167545	8750.58	8676.31	8175.75	5195.85	1259.52	6281.12
b0429	cyoD	1111.6	-1.55996	0.372776	-4.1847	2.85545e-05	0.000358753	1652.09	1655.79	1672.86	630.188	287.363	771.307
b0430	cyoC	1732.66	-1.8848	0.429406	-4.38932	1.13703e-05	0.00015994	2351.21	2905.45	2924.35	863.314	316.586	1035.07
b0431	cyoB	9825.51	-2.43439	0.350097	-6.95349	3.56364e-12	2.06691e-10	15961.8	16576.5	17211.1	3961.03	1659.88	3582.79
b0432	cyoA	7091.26	-2.82507	0.33952	-8.3208	8.73744e-17	9.73535e-15	10799.8	12941.7	13544.1	2436.65	1047.17	1778.08
b0433	ampG	205.963	0.480644	0.289697	1.65912	0.0970907	0.25692	140.044	166.946	208.581	252.288	287.363	180.554
b0434	yajG	537.902	0.129764	0.22742	0.570594	0.568275	0.759975	454.05	511.577	575.178	559.93	662.395	464.282
b0435	bolA	16068.5	0.385011	0.288984	1.33229	0.182765	0.393005	15238.6	13465	13108	16108.1	13377.5	25113.6
b0436	tig	2237.72	-0.171494	0.347608	-0.493355	0.621761	0.796291	1791.04	2686.76	2633.6	1817.11	3045.07	1452.75
b0437	clpP	11002.9	-0.255218	0.166178	-1.53581	0.124584	0.303496	12833.7	11418.7	11669	10198	8945.26	10953.1
b0438	clpX	19496.7	0.0805128	0.175168	0.459631	0.645781	0.81303	21705.8	17775.4	17377.6	20524.7	18749.7	20846.9
b0439	lon	22512.1	0.413217	0.299947	1.37763	0.168317	0.370209	21083.2	17994	18853.4	21026.1	19610.8	36505.2
b0440	hupB	7945.93	-0.0831043	0.404163	-0.205621	0.837087	0.922682	4853.41	9485.66	10184.7	8985.5	9618.37	4547.96
b0441	ppiD	1721.42	-0.210013	0.160697	-1.30689	0.191251	0.406087	1835.89	1900.84	1802.44	1542.47	1775.8	1471.06
b0442	ybaV	187.074	-0.328425	0.25153	-1.30571	0.191651	0.406539	235.231	200.14	189.619	184.16	128.583	184.714
b0443	fadM	467.348	-0.804912	0.594078	-1.35489	0.175452	0.38148	944.205	360.252	479.315	245.901	135.401	639.011
b0444	queC	362.933	-0.216789	0.19752	-1.09756	0.272398	0.503791	401.533	376.849	391.88	321.481	389.644	296.208
b0445	ybaE	689.595	-0.0555803	0.270793	-0.205251	0.837376	0.922682	691.469	697.073	719.5	796.251	771.495	461.786
b0446	cof	290.042	0.379666	0.196754	1.92964	0.0536508	0.169016	258.207	237.239	261.253	324.674	290.285	368.596
b0447	decR	921.649	-0.814726	0.298599	-2.72849	0.00636243	0.0332574	781.185	1319.95	1424.25	747.283	559.139	698.087
b0448	mdlA	662.718	0.216328	0.256625	0.842973	0.399244	0.629336	469.367	653.14	716.339	820.734	721.816	594.913
b0449	mdlB	398.206	0.227655	0.303578	0.749906	0.453311	0.669919	250.548	365.133	484.583	497.124	403.282	388.565
b0450	glnK	9.82577	-1.10968	1.15226	-0.963053	0.335521	0.570749	0	23.431	16.855	2.12901	10.7152	5.82432
b0451	amtB	133.589	-0.796436	0.398255	-1.99982	0.0455201	0.151519	101.751	202.092	204.367	137.321	76.9547	79.0444
b0452	tesB	1028.47	-0.0683927	0.287454	-0.237926	0.811939	0.910189	1216.63	1057.32	884.89	1058.12	703.308	1250.57
b0453	ybaY	25103.9	-0.435804	0.512	-0.85118	0.394669	0.622826	37328.4	27016	22257.1	17701.7	8588.73	37731.6
b0454	ybaZ	163.458	-0.486905	0.259924	-1.87326	0.0610325	0.186041	198.031	201.116	173.818	107.515	130.531	169.737
b0455	ffs	5.30153	-2.25593	1.0993	-2.05214	0.0401558	0.138003	2.18819	13.6681	10.5344	0	2.92233	2.49614
b0456	ybaA	117.636	0.587779	0.38086	1.5433	0.122759	0.300266	130.197	86.89	65.3133	110.709	118.841	193.867
b0457	pdeB	541.516	0.278515	0.260526	1.06905	0.285047	0.516994	560.177	460.81	447.712	578.027	456.858	745.513
b0458	ylaC	2068.83	-1.4017	0.331037	-4.23427	2.29292e-05	0.000297798	2698.04	3146.59	3160.32	1331.7	658.499	1417.81
b0459	maa	116.553	0.435039	0.220417	1.97371	0.0484146	0.156958	98.4687	93.7241	105.344	134.128	123.712	143.944
b0460	hha	344.009	1.72633	0.279661	6.17294	6.70334e-10	2.75553e-08	194.749	158.159	126.413	497.124	434.453	653.156
b0461	tomB	1061.41	0.592066	0.290319	2.03936	0.041414	0.141409	840.266	816.18	883.836	1183.73	903	1741.47
b0462	acrB	3068.4	-0.284079	0.230687	-1.23145	0.218156	0.443861	2992.35	3603.49	3512.17	2797.52	3320.74	2184.12
b0463	acrA	955.622	-0.628765	0.221189	-2.84265	0.00447398	0.0251899	907.006	1254.54	1319.96	777.089	775.392	699.751
b0464	acrR	251.444	-0.289163	0.237131	-1.21942	0.222684	0.449296	222.102	322.176	285.482	209.708	216.253	252.942
b0465	mscK	496.38	-0.313627	0.196194	-1.59856	0.109919	0.277849	487.967	555.51	606.782	410.899	497.77	419.351
b0466	ybaM	48.4092	0.162217	0.296174	0.547709	0.583892	0.769527	50.3284	48.8146	37.9238	50.0318	52.602	50.7548
b0467	priC	239.246	-0.323029	0.206872	-1.56149	0.118408	0.292668	293.218	280.196	224.383	216.095	203.589	217.996
b0468	ybaN	241.052	-0.724139	0.284218	-2.54782	0.0108397	0.0511654	332.605	309.485	259.146	192.676	128.583	223.82
b0469	apt	163.606	-0.762514	0.225841	-3.37633	0.000734587	0.00599276	208.972	206.974	202.261	108.58	110.074	144.776
b0470	dnaX	977.653	-0.0813379	0.216669	-0.375402	0.707362	0.853511	1078.78	1009.49	927.027	934.636	1133.86	782.123
b0471	ybaB	738.793	-0.0363049	0.165907	-0.218826	0.826785	0.918711	745.079	702.93	796.401	685.542	793.9	708.903
b0472	recR	463.538	0.201743	0.213437	0.945213	0.34455	0.578439	426.697	472.525	393.987	471.576	585.44	431
b0473	htpG	14554.1	-1.8313	0.414455	-4.41858	9.93525e-06	0.000142114	21912.6	24198.4	22056.9	6804.32	9434.26	2917.99
b0474	adk	650.19	0.919949	0.308137	2.98552	0.00283099	0.0179169	410.286	441.284	497.224	710.026	1204.97	637.347
b0475	hemH	1165.24	0.255305	0.203366	1.2554	0.209333	0.431718	1239.61	1024.13	923.867	1262.5	1148.48	1392.85
b0476	aes	266.274	-0.294635	0.179309	-1.64317	0.100347	0.262104	277.9	288.006	313.925	252.288	236.709	228.813
b0477	gsk	1013.17	-0.708564	0.325275	-2.17835	0.0293796	0.10864	791.032	1305.3	1674.97	786.67	650.706	870.32
b0478	ybaL	6460.62	-0.768603	0.276261	-2.78217	0.00539975	0.029462	5746.19	9994.3	8685.61	4591.21	4209.13	5537.27
b0479	fsr	346.005	0.268259	0.17594	1.52472	0.12733	0.307131	299.782	342.679	299.177	360.868	397.437	376.085
b0480	ushA	3041.74	-0.335418	0.15418	-2.1755	0.0295927	0.109238	3059.09	3512.7	3609.09	2720.88	2757.71	2590.99
b0481	ybaK	197.916	0.323935	0.276006	1.17365	0.240534	0.468765	179.432	170.851	176.978	191.611	292.233	176.394
b0482	ybaP	957.954	0.959467	0.166198	5.77304	7.78522e-09	2.53559e-07	663.022	650.211	638.385	1411.54	1214.72	1169.86
b0483	ybaQ	813.346	0.50154	0.254577	1.97009	0.0488278	0.158056	655.364	749.792	615.209	922.927	734.479	1202.31
b0484	copA	6257.94	-0.084829	0.194784	-0.435503	0.663198	0.826119	7482.52	6217.03	5626.42	6097.49	5536.84	6587.31
b0485	glsA	13494.7	0.176115	0.206262	0.853841	0.393193	0.621986	15135.7	11368.9	11512	13548	13462.2	15941.2
b0486	ybaT	7770.28	-0.0870325	0.228593	-0.380731	0.703403	0.850917	9295.44	7702.95	7015.91	7286.54	6323.92	8996.91
b0487	cueR	1214.56	-0.186372	0.210263	-0.886377	0.375414	0.606939	1413.57	1229.15	1236.74	1027.25	1011.13	1369.55
b0488	ybbJ	759.646	-0.323942	0.32098	-1.00923	0.312865	0.547837	882.936	885.497	765.851	576.962	471.469	975.158
b0489	qmcA	2092.75	-0.401973	0.300936	-1.33574	0.181634	0.391367	2835.9	2276.71	2035.25	1640.4	1322.84	2445.38
b0490	fetA	258.506	0.733067	0.200841	3.64999	0.000262252	0.00254409	184.902	221.618	175.925	302.32	340.939	325.33
b0491	fetB	88.1647	0.700787	0.410745	1.70614	0.0879828	0.23934	52.5166	48.8146	100.077	109.644	142.22	75.7162
b0492	cnoX	1688.59	-0.755199	0.161588	-4.67362	2.95937e-06	4.87548e-05	2014.23	2316.74	2031.03	1197.57	1353.04	1218.95
b0493	ybbO	331.388	-0.439141	0.220954	-1.98748	0.0468694	0.154072	429.98	341.702	372.918	301.255	233.786	308.689
b0494	tesA	540.166	-0.091742	0.190981	-0.480372	0.630963	0.803699	611.6	573.084	487.743	476.899	525.046	566.623
b0495	ybbA	278.518	0.0449732	0.18896	0.238004	0.811878	0.910189	309.629	250.907	262.307	276.772	284.44	287.056
b0496	ybbP	337.579	-0.405315	0.195412	-2.07416	0.0380647	0.13232	354.487	439.332	360.277	269.32	300.026	302.033
b0497	rhsD	219.405	0.0600808	0.228374	0.263081	0.792488	0.899811	222.102	220.642	202.261	204.385	195.796	271.247
b0498	ybbC	2.18171	1.15527	1.53581	0.752222	0.451918	NA	0	1.95258	2.10688	0	4.87055	4.16023
b0499	ylbH	7.90529	-0.134191	0.728721	-0.184146	0.853899	0.927715	4.37638	7.81034	12.6413	4.25802	11.6893	6.65637
b0501	ybbD	4.15652	-0.0105905	1.07669	-0.00983609	0.992152	0.997041	4.37638	3.90517	4.21376	7.45154	0	4.99228
b0502	ylbG	70.6627	-0.437738	0.299312	-1.46248	0.143609	0.331548	66.7399	86.89	90.5959	50.0318	56.4984	73.22
b0503	selU	162.18	-0.122812	0.229948	-0.534089	0.59328	0.774462	149.891	160.112	196.993	158.611	168.521	138.952
b0504	allS	37.4818	0.260105	0.453406	0.573669	0.566192	0.759293	43.7638	16.597	42.1376	46.8383	33.1198	42.4343
b0505	allA	62.0613	-0.324528	0.333727	-0.972437	0.330833	0.56573	53.6107	60.5301	92.7027	61.7414	55.5243	48.2587
b0506	allR	669.409	-0.262953	0.163434	-1.60893	0.107632	0.273702	751.644	773.223	665.774	629.123	577.647	619.042
b0507	gcl	204.27	0.02413	0.368555	0.065472	0.947798	0.974269	262.583	185.496	160.123	166.063	150.987	300.369
b0508	hyi	7.44775	1.52817	0.767494	1.99112	0.0464679	0.153109	2.18819	2.92888	6.32064	14.9031	11.6893	6.65637
b0509	glxR	19.6518	0.585784	0.438268	1.33659	0.181357	0.390989	18.5996	11.7155	16.855	27.6772	21.4304	21.6332
b0511	ybbW	7.94588	0.120916	0.634761	0.19049	0.848925	0.926207	5.47048	7.81034	9.48096	8.51605	9.7411	6.65637
b0512	allB	195.143	-0.301605	0.497004	-0.606845	0.543954	0.740071	287.747	201.116	158.016	118.16	95.4628	310.353
b0513	ybbY	41.4461	0.550022	0.40063	1.37289	0.169786	0.372078	45.952	36.1228	18.9619	44.7093	49.6796	53.2509
b0514	glxK	22.8912	0.347001	0.425053	0.816371	0.414288	0.640415	24.0701	21.4784	14.7482	29.8062	27.2751	19.9691
b0515	allE	77.9041	0.299593	0.580073	0.516474	0.605523	0.783563	28.4465	112.274	68.4736	104.322	113.971	39.9382
b0516	allC	27.1016	0.0405958	0.426607	0.0951596	0.924188	0.961428	24.0701	27.3362	28.4429	32.9997	33.1198	16.6409
b0517	allD	8.98224	0.247371	0.86319	0.286577	0.774436	0.89365	2.18819	10.7392	11.5878	8.51605	17.534	3.32818
b0518	fdrA	17.519	-0.300274	0.491243	-0.611253	0.541032	0.737518	13.1292	21.4784	23.1757	17.0321	19.4822	10.8166
b0520	ylbF	27.4218	-0.271267	0.413476	-0.656065	0.511782	0.716326	22.976	35.1465	31.6032	32.9997	18.5081	23.2973
b0521	ybcF	24.2079	-0.0555183	0.506857	-0.109534	0.912779	0.955664	19.6937	29.2888	25.2826	18.0966	14.6117	38.2741
b0522	purK	46.0881	-0.0772406	0.344137	-0.224447	0.822409	0.916337	51.4225	54.6724	35.817	38.3222	55.5243	40.7703
b0523	purE	23.0034	-0.261657	0.419248	-0.624112	0.532554	0.731852	18.5996	32.2176	24.2291	21.2901	23.3786	18.305
b0524	lpxH	122.533	0.563589	0.231289	2.43673	0.0148208	0.0643419	89.7159	116.179	90.5959	144.773	144.168	149.768
b0525	ppiB	2912.03	-0.337182	0.174353	-1.9339	0.0531249	0.167819	3205.7	3330.13	3217.21	2350.43	2404.1	2964.58
b0526	cysS	478.252	-0.149324	0.159907	-0.933816	0.350399	0.58386	501.096	508.648	499.331	423.673	484.133	452.633
b0527	ybcI	7.97878	0.273777	0.654944	0.418016	0.675935	0.832435	5.47048	7.81034	8.42752	5.32253	11.6893	9.15251
b0528	ybcJ	64.4822	-0.123953	0.39674	-0.312428	0.754715	0.881097	47.0461	52.7198	102.184	52.1608	60.3948	72.388
b0529	folD	847.903	-0.339732	0.23663	-1.43571	0.151084	0.3431	803.067	1067.09	971.272	705.768	907.871	632.355
b0530	sfmA	9.07983	-0.0859062	0.667293	-0.128738	0.897565	0.947726	13.1292	10.7392	4.21376	6.38704	11.6893	8.32046
b0531	sfmC	2.43938	0.453418	1.2298	0.368692	0.712358	NA	0	1.95258	4.21376	3.19352	1.94822	3.32818
b0532	sfmD	15.2967	-0.848045	0.649841	-1.305	0.191892	0.406701	10.941	29.2888	18.9619	4.25802	11.6893	16.6409
b0533	sfmH	3.35902	0.422472	1.16019	0.364142	0.715752	NA	6.56458	0	2.10688	4.25802	3.89644	3.32818
b0534	sfmF	12.6983	0.837677	0.605496	1.38346	0.166525	0.366459	8.75277	5.85775	12.6413	24.4836	13.6375	10.8166
b0535	fimZ	3.15042	0.361543	1.02383	0.353128	0.723992	NA	2.18819	3.90517	2.10688	3.19352	5.84466	1.66409
b0536	argU	3.79841	-0.462225	1.15385	-0.400595	0.688718	NA	3.28229	5.85775	4.21376	0	1.94822	7.48841
b0537	intD	152.365	-0.657307	0.197427	-3.32936	0.000870451	0.00687591	179.432	192.33	187.512	123.483	114.945	116.486
b0539	exoD	86.4509	0.358241	0.373658	0.958741	0.337689	0.572827	53.6107	71.2693	102.184	130.934	75.0065	85.7007
b0540	insE3	0	NA	NA	NA	NA	NA	0	0	0	0	0	0
b0541	insF3	0	NA	NA	NA	NA	NA	0	0	0	0	0	0
b0542	renD	11.6036	-0.841428	0.720596	-1.16768	0.242934	0.472261	20.7878	3.90517	20.0154	8.51605	9.7411	6.65637
b0543	emrE	48.7822	-0.329169	0.372994	-0.882505	0.377504	0.608192	48.1402	58.5775	55.8323	48.9673	54.5502	26.6255
b0544	ybcK	13.1906	2.16929	0.622477	3.48493	0.000492258	0.00433309	4.37638	7.81034	2.10688	22.3546	17.534	24.9614
b0545	ybcL	59.0421	0.0847139	0.30803	0.275019	0.783302	0.896747	61.2694	48.8146	62.153	46.8383	71.1101	64.0675
b0546	ybcM	109.737	2.06677	0.401559	5.14685	2.64896e-07	5.9658e-06	67.834	36.1228	23.1757	168.192	173.392	189.706
b0547	ybcN	4.36091	-0.0260085	0.92211	-0.0282054	0.977498	0.989416	3.28229	7.81034	2.10688	2.12901	5.84466	4.99228
b0548	ninE	0	NA	NA	NA	NA	NA	0	0	0	0	0	0
b0549	ybcO	0.162352	0.834044	4.08047	0.204399	0.838042	NA	0	0	0	0	0.97411	0
b0550	rusA	1.85455	-0.33407	1.69683	-0.196879	0.843923	NA	0	1.95258	4.21376	1.06451	3.89644	0
b0551	quuD	32.4113	0.980258	0.527539	1.85817	0.0631444	0.190287	26.2583	7.81034	31.6032	34.0642	44.8091	49.9228
b0552	insH2	0	NA	NA	NA	NA	NA	0	0	0	0	0	0
b0553	nmpC	548.157	-1.0487	0.368394	-2.84669	0.00441767	0.0249725	486.873	877.687	852.233	335.319	493.874	242.957
b0554	essD	1.83179	-2.40252	2.02054	-1.18905	0.23442	NA	0	1.95258	7.37408	0	0	1.66409
b0555	rrrD	10.8836	0.176874	1.02845	0.171981	0.863452	0.931191	0	13.6681	16.855	18.0966	11.6893	4.99228
b0556	rzpD	9.78312	1.06377	0.795382	1.33744	0.18108	0.390771	5.47048	2.92888	10.5344	24.4836	7.79288	7.48841
b0557	borD	253.836	0.917661	0.369293	2.48491	0.0129583	0.0584297	113.786	157.183	255.986	376.835	372.11	247.118
b0558	ybcV	271.476	1.08278	0.352611	3.07075	0.00213525	0.0141471	150.985	155.23	215.955	536.511	263.984	306.193
b0559	ybcW	198.806	1.20201	0.298755	4.02338	5.73694e-05	0.00066006	90.81	125.942	144.321	351.287	230.864	249.614
b0560	nohD	147.9	0.847447	0.343101	2.46996	0.0135129	0.0600351	80.9631	110.321	125.359	266.127	149.039	155.593
b0561	tfaD	3.4342	-0.917495	1.62424	-0.564876	0.572158	NA	0	3.90517	9.48096	6.38704	0	0.832046
b0562	ybcY	44.4728	0.424302	0.348631	1.21705	0.223584	0.450573	42.6697	33.1939	37.9238	67.0639	41.8867	44.0984
b0563	tfaX	2.17894	2.47247	1.92429	1.28488	0.198835	NA	0	1.95258	0	0	7.79288	3.32818
b0564	appY	120.714	5.10125	0.632633	8.06353	7.4125e-16	7.65477e-14	4.37638	11.7155	4.21376	183.095	405.23	115.654
b0565	ompT	5857.6	2.25606	0.701909	3.21418	0.00130817	0.0095332	640.046	2392.89	3050.76	10873.9	15816.6	2371.33
b0566	envY	37.9958	0.525787	0.453053	1.16054	0.245828	0.476356	30.6347	17.5733	45.2979	56.4188	33.1198	44.9305
b0567	ybcH	77.8696	-0.0791411	0.281417	-0.281224	0.778539	0.895478	78.7749	65.4116	95.8631	72.3864	85.7217	69.0598
b0568	nfrA	317.081	0.102172	0.170003	0.600998	0.547841	0.742735	319.476	293.864	304.444	311.9	345.809	326.994
b0569	nfrB	198.845	-0.0530983	0.259111	-0.204925	0.837631	0.922682	182.714	221.618	203.314	204.385	148.065	232.973
b0570	cusS	123.66	0.0509072	0.297514	0.171109	0.864138	0.931219	154.268	107.392	103.237	117.096	105.204	154.761
b0571	cusR	114.298	-0.099838	0.244141	-0.408936	0.682587	0.835764	113.786	138.633	102.184	116.031	100.333	114.822
b0572	cusC	11.8572	-0.56609	0.653525	-0.86621	0.386375	0.616859	8.75277	14.6444	18.9619	14.9031	3.89644	9.98455
b0573	cusF	3.23072	5.08275	1.62321	3.1313	0.00174035	NA	0	0	0	7.45154	1.94822	9.98455
b0574	cusB	9.17789	-0.027251	0.617105	-0.0441594	0.964777	0.982648	6.56458	11.7155	9.48096	10.6451	5.84466	10.8166
b0575	cusA	116.883	-0.12062	0.323544	-0.372808	0.709291	0.854621	102.845	139.61	123.253	80.9025	103.256	151.432
b0576	pheP	101.698	-0.0570785	0.280859	-0.203228	0.838957	0.922874	97.3746	102.511	111.665	90.483	80.8512	127.303
b0577	ybdG	337.001	0.0557837	0.170384	0.327399	0.743366	0.875741	329.323	343.655	318.139	349.158	361.395	320.338
b0578	nfsB	6514.22	-1.31106	0.409322	-3.20299	0.00136008	0.00980357	6212.28	10290.1	11355	3841.8	5340.07	2046
b0579	ybdF	232.965	-0.0584304	0.19893	-0.293724	0.768969	0.890053	246.172	253.836	212.795	249.094	210.408	225.484
b0580	ybdJ	123.68	-0.0613877	0.251889	-0.243709	0.807456	0.907798	135.668	131.799	111.665	125.612	98.3852	138.952
b0581	ybdK	3679.81	0.390324	0.227936	1.71243	0.0868182	0.237001	3642.25	3020.65	2892.75	4028.09	3457.12	5038.04
b0582	insL2	18.7499	-1.27215	0.533852	-2.38296	0.0171742	0.0719243	22.976	25.3836	31.6032	5.32253	9.7411	17.473
b0583	entD	50.7247	-0.36008	0.387121	-0.93015	0.352294	0.585175	74.3985	41.0043	55.8323	52.1608	30.1974	50.7548
b0584	fepA	151.268	-0.127871	0.275985	-0.463326	0.643131	0.812598	173.961	163.041	136.947	166.063	106.178	161.417
b0585	fes	54.4204	-1.64881	0.834851	-1.97497	0.0482716	0.156958	133.48	74.1982	40.0307	31.9352	1.94822	44.9305
b0586	entF	269.455	-0.652848	0.522282	-1.24999	0.211303	0.434357	482.496	246.026	260.2	144.773	107.152	376.085
b0587	fepE	3.84662	1.41662	1.33803	1.05874	0.289719	NA	0	0	6.32064	4.25802	5.84466	6.65637
b0588	fepC	25.1405	-0.754107	0.826033	-0.912925	0.361282	0.593585	60.1753	26.3599	8.42752	10.6451	7.79288	37.4421
b0589	fepG	43.7138	-0.717497	0.483505	-1.48395	0.137823	0.323163	64.5517	43.9332	54.7789	40.4512	13.6375	44.9305
b0590	fepD	105.883	-1.48563	0.586564	-2.53276	0.0113168	0.0528868	207.878	166.946	93.7562	40.4512	21.4304	104.838
b0591	entS	22.4054	-1.31397	0.451045	-2.91316	0.0035779	0.0214877	29.5406	31.2414	34.7635	19.1611	9.7411	9.98455
b0592	fepB	89.2013	-1.02721	0.619345	-1.65853	0.0972096	0.25692	138.95	129.847	90.5959	47.9028	15.5858	112.326
b0593	entC	31.9825	-0.639535	0.565115	-1.13169	0.257765	0.488311	70.0222	17.5733	29.4963	23.4191	21.4304	29.9537
b0594	entE	77.9254	-0.495241	0.372657	-1.32895	0.183866	0.394571	129.103	64.4353	80.0615	77.7089	49.6796	66.5637
b0595	entB	68.4305	-0.0709436	0.463051	-0.153209	0.878234	0.939475	108.316	50.7672	51.6186	38.3222	80.8512	80.7085
b0596	entA	174.044	-0.580275	0.256217	-2.26478	0.0235262	0.0918913	216.631	209.903	199.1	167.127	104.23	147.272
b0597	entH	49.9031	-0.584218	0.357083	-1.63608	0.101822	0.264487	68.9281	52.7198	57.9392	51.0963	26.301	42.4343
b0598	cstA	9209.78	-2.07094	0.454318	-4.55835	5.15573e-06	7.76846e-05	16607.3	14443.3	13585.2	3639.55	1449.48	5533.94
b0599	hcxA	781.479	-0.703468	0.373229	-1.88481	0.059455	0.18268	1051.43	932.359	921.76	506.705	355.55	921.075
b0600	ybdL	281.767	-0.333218	0.385922	-0.863434	0.387899	0.617894	427.792	238.215	277.055	203.321	177.288	366.932
b0601	ybdM	45.2091	0.169538	0.293706	0.577237	0.563779	0.757551	41.5757	42.9569	43.1911	43.6448	51.6279	48.2587
b0602	ybdN	12.0612	0.386228	0.593509	0.650754	0.515205	0.719753	10.941	5.85775	14.7482	12.7741	9.7411	18.305
b0603	ybdO	47.3531	0.210529	0.354974	0.593083	0.553126	0.747744	41.5757	35.1465	54.7789	61.7414	52.602	38.2741
b0604	dsbG	302.016	0.104931	0.254054	0.413026	0.679587	0.833756	347.923	264.575	261.253	259.739	300.026	378.581
b0605	ahpC	40200.8	-0.360138	0.177116	-2.03334	0.0420179	0.143124	44437.8	45930.6	45209.4	37401.4	29755.2	38470.5
b0606	ahpF	3463.97	-0.252787	0.164907	-1.53291	0.125299	0.304426	4194.76	3610.33	3495.31	2960.39	3330.48	3192.56
b0607	uspG	12124.4	-0.221193	0.344578	-0.641926	0.520921	0.723616	16697	11887.3	10572.3	10213.9	7590.27	15785.6
b0608	ybdR	172.673	0.549013	0.265435	2.06836	0.0386065	0.133546	171.773	124.965	124.306	202.256	171.443	241.293
b0610	rnk	717.332	0.425552	0.265194	1.60468	0.108564	0.27574	529.543	671.689	635.224	810.089	1038.4	619.042
b0611	rna	694.305	-0.0220516	0.192555	-0.114521	0.908825	0.953664	717.727	727.338	654.186	580.156	750.065	736.361
b0612	citT	29.0443	-0.355508	0.378475	-0.939317	0.347568	0.582121	28.4465	27.3362	42.1376	23.4191	26.301	26.6255
b0613	citG	12.4942	-0.102087	0.742471	-0.137496	0.890639	0.945104	14.2232	11.7155	12.6413	25.5481	5.84466	4.99228
b0614	citX	8.27144	-0.765023	0.93112	-0.821616	0.411295	0.638735	3.28229	6.83405	21.0688	4.25802	11.6893	2.49614
b0615	citF	19.3114	0.340675	0.671217	0.507548	0.61177	0.789225	12.0351	11.7155	27.3894	10.6451	39.9385	14.1448
b0616	citE	21.6097	0.0993861	0.482812	0.205848	0.836909	0.922682	25.1642	22.4547	14.7482	27.6772	26.301	13.3127
b0617	citD	4.52042	-1.14596	0.832168	-1.37708	0.168488	0.370394	6.56458	5.85775	6.32064	2.12901	2.92233	3.32818
b0618	citC	80.3852	-0.360137	0.574588	-0.626774	0.530807	0.731031	26.2583	103.487	141.161	77.7089	83.7735	49.9228
b0619	dpiB	102.445	-0.364183	0.260254	-1.39934	0.161712	0.359229	98.4687	119.108	128.52	89.4185	75.9806	103.174
b0620	dpiA	51.3265	1.61779	0.6274	2.57856	0.00992125	0.0477431	18.5996	40.028	16.855	59.6123	141.246	31.6177
b0621	dcuC	882.333	3.11747	0.588769	5.29489	1.19091e-07	2.88132e-06	149.891	147.42	249.665	1136.89	3074.29	535.838
b0622	pagP	537.901	3.65032	0.335012	10.8961	1.20332e-27	3.39658e-25	119.256	64.4353	54.7789	879.282	1035.48	1074.17
b0623	cspE	21596.4	0.933905	0.224664	4.1569	3.22597e-05	0.000399378	16602.9	13901.4	14018.1	23855.6	26362.4	34837.8
b0624	crcB	195.297	0.0234724	0.271855	0.0863416	0.931195	0.964924	225.384	169.875	186.459	177.773	162.676	249.614
b0627	tatE	45.9147	-0.0605248	0.509648	-0.118758	0.905467	0.952011	43.7638	50.7672	46.3514	15.9676	60.3948	58.2432
b0628	lipA	2846.82	-1.20161	0.178794	-6.72064	1.80925e-11	9.69665e-10	3545.97	4337.67	4020.98	1853.31	1544.94	1778.08
b0629	ybeF	79.7424	-0.666742	0.331413	-2.01182	0.0442393	0.148188	74.3985	123.989	94.8096	76.6444	48.7055	59.9073
b0630	lipB	45.9166	-0.154664	0.364586	-0.424217	0.671407	0.82927	36.1052	63.459	45.2979	40.4512	53.5761	36.61
b0631	ybeD	1076.07	-2.26139	0.285287	-7.92673	2.24991e-15	2.16503e-13	1510.95	2150.77	1681.29	285.288	343.861	484.251
b0632	dacA	455.079	0.228179	0.238453	0.956914	0.338611	0.57393	438.733	440.308	378.185	465.189	607.845	400.214
b0633	rlpA	1062.42	0.0786791	0.194384	0.404762	0.685653	0.838064	1227.58	932.359	940.722	1112.41	1053.99	1107.45
b0634	mrdB	154.78	0.084278	0.233431	0.361041	0.718069	0.858494	137.856	169.875	143.268	136.257	161.702	179.722
b0635	mrdA	209.466	-0.278313	0.225789	-1.23262	0.217717	0.443446	195.843	230.405	262.307	186.289	211.382	170.569
b0636	rlmH	105.097	-0.613011	0.338158	-1.81279	0.0698636	0.204425	82.0572	151.325	147.482	93.6765	88.644	67.3957
b0637	rsfS	297.452	-0.764809	0.297885	-2.56746	0.0102446	0.0489816	243.983	445.189	434.017	234.191	220.149	207.179
b0638	cobC	74.0968	0.711919	0.325333	2.18828	0.0286491	0.106624	56.893	38.0754	73.7408	97.9346	84.7476	93.1892
b0639	nadD	270.584	1.03871	0.196969	5.27348	1.33863e-07	3.18413e-06	198.031	177.685	155.909	377.9	342.887	371.093
b0640	holA	555.716	0.687315	0.201114	3.41755	0.00063188	0.0052665	460.614	431.521	385.559	679.155	596.156	781.291
b0641	lptE	766.9	-0.211906	0.201193	-1.05325	0.292227	0.526058	769.15	846.445	854.34	644.026	642.913	844.527
b0642	leuS	4878.03	-0.269746	0.164741	-1.63739	0.101549	0.264103	5933.28	5120.65	4944.85	4163.28	4394.21	4711.88
b0643	ybeL	9335.74	-0.000136495	0.240818	-0.000566796	0.999548	0.999548	10938.8	8754.41	8315.86	9258.01	7488.96	11258.4
b0644	ybeQ	433.226	-0.0830526	0.21088	-0.393838	0.693701	0.843276	439.827	447.142	449.819	497.124	347.757	417.687
b0645	ybeR	3.25515	-0.178305	1.03933	-0.171558	0.863785	NA	2.18819	1.95258	6.32064	2.12901	1.94822	4.99228
b0646	djlB	8.52741	-0.426324	0.655843	-0.650039	0.515667	0.719753	13.1292	7.81034	8.42752	9.58056	3.89644	8.32046
b0647	ybeT	4.02313	-0.868285	0.91312	-0.950899	0.341655	0.577012	4.37638	4.88146	6.32064	4.25802	0.97411	3.32818
b0648	ybeU	10.3671	-0.270984	0.795294	-0.340734	0.733304	0.867652	24.0701	5.85775	4.21376	6.38704	11.6893	9.98455
b0649	djlC	25.3044	-0.822564	0.469805	-1.75086	0.0799696	0.223801	35.0111	42.9569	18.9619	21.2901	13.6375	19.9691
b0650	hscC	50.7052	-0.14847	0.351218	-0.422728	0.672493	0.83037	52.5166	69.3167	37.9238	44.7093	56.4984	43.2664
b0651	rihA	4036.55	-0.235266	0.37001	-0.635838	0.524882	0.726198	3989.07	4393.32	4712.04	3952.51	5209.54	1962.8
b0652	gltL	576.773	-0.994399	0.309956	-3.20819	0.00133573	0.00966752	888.406	693.167	722.66	460.931	244.502	450.969
b0653	gltK	262.148	-1.40889	0.44344	-3.17718	0.00148712	0.010618	503.284	321.2	318.139	193.74	64.2913	172.234
b0654	gltJ	244.713	-1.32665	0.266648	-4.97529	6.51508e-07	1.31356e-05	398.251	313.39	338.154	163.934	102.282	152.264
b0655	gltI	6136.78	-1.22273	0.451709	-2.7069	0.00679147	0.0351312	9912.51	7994.86	7869.2	4255.9	1468.96	5319.27
b0656	insH3	39.9393	-1.23485	0.401809	-3.07323	0.00211758	0.014053	53.6107	69.3167	45.2979	27.6772	14.6117	29.1216
b0657	lnt	944.9	-0.13262	0.146272	-0.906667	0.364583	0.596692	986.875	1015.34	962.844	849.476	942.939	911.922
b0658	ybeX	4064.56	0.112264	0.235904	0.47589	0.634153	0.805582	4481.42	3781.18	3457.39	4095.16	3437.64	5134.56
b0659	ybeY	1399.65	0.169594	0.239128	0.709217	0.47819	0.692427	1532.83	1261.37	1158.78	1400.89	1235.17	1808.87
b0660	ybeZ	5106.38	0.0243449	0.250923	0.0970214	0.922709	0.96082	5705.71	4952.73	4531.9	5109.63	3937.35	6400.93
b0661	miaB	733.62	0.216707	0.185834	1.16613	0.24356	0.473043	768.055	640.448	627.85	713.219	830.916	821.229
b0662	ubiF	4992.4	0.00505141	0.222095	0.0227444	0.981854	0.991928	5665.23	4848.27	4438.14	4512.44	4432.2	6058.13
b0664	glnX	222.904	0.479953	0.287903	1.66706	0.0955015	0.25431	126.915	208.927	222.276	276.772	273.725	228.813
b0665	glnV	405.553	0.665571	0.333991	1.99278	0.0462858	0.152835	205.69	338.773	396.094	508.834	607.845	376.085
b0666	metU	6.70021	0.470091	0.866106	0.542765	0.587292	0.770798	3.28229	1.95258	11.5878	11.7096	5.84466	5.82432
b0668	glnW	0.52672	-2.58719	3.99364	-0.647829	0.517096	NA	0	0	3.16032	0	0	0
b0670	glnU	3.94147	0.336254	0.886006	0.379517	0.704304	0.851134	3.28229	1.95258	5.2672	4.25802	3.89644	4.99228
b0672	leuW	23.7458	-0.567845	0.634511	-0.894933	0.370823	0.603174	15.3173	24.4073	45.2979	11.7096	34.0939	11.6486
b0673	metT	27.8809	-0.31302	0.473455	-0.66114	0.508522	0.713441	30.6347	33.1939	28.4429	38.3222	23.3786	13.3127
b0674	asnB	1030.74	-0.177863	0.1983	-0.896941	0.36975	0.602038	1228.67	1032.92	1020.78	982.539	1084.18	835.374
b0675	umpH	1028.06	-0.325231	0.191846	-1.69528	0.0900232	0.243241	1067.84	1305.3	1056.6	941.023	983.852	813.741
b0676	nagC	2449.01	-0.536351	0.219152	-2.4474	0.0143892	0.0631337	2398.26	3114.37	3184.55	2127.95	1682.29	2186.62
b0677	nagA	5643.98	-0.565706	0.219521	-2.577	0.00996626	0.0478969	5449.69	7477.42	7282.43	4909.5	3913.98	4830.86
b0678	nagB	6432.93	-0.790954	0.282128	-2.80352	0.00505474	0.0279762	5833.72	9508.11	9118.58	5007.44	3734.74	5394.99
b0679	nagE	11883.6	-1.40965	0.239407	-5.88811	3.90648e-09	1.37808e-07	14165.3	19366.7	18270.9	7153.48	5153.04	7192.21
b0680	glnS	2216.69	-0.0169384	0.272961	-0.0620543	0.95052	0.974927	2774.63	2016.04	1898.3	2196.08	2700.23	1714.85
b0681	chiP	143.461	-1.43458	0.340489	-4.2133	2.51663e-05	0.000319024	130.197	272.386	225.436	84.096	77.9288	70.7239
b0682	chiQ	36.1727	0.0928319	0.389213	0.238512	0.811484	0.910189	36.1052	31.2414	37.9238	38.3222	24.3528	49.0907
b0683	fur	2799.07	-0.393135	0.138153	-2.84565	0.00443204	0.0250204	2971.57	3323.3	3239.33	2386.62	2444.04	2429.57
b0684	fldA	2218.71	0.426144	0.185767	2.29397	0.0217922	0.0872797	2013.14	1900.84	1766.62	2507.98	2219.02	2904.67
b0685	ybfE	77.5457	-0.756025	0.276843	-2.73088	0.00631647	0.033058	96.2805	103.487	92.7027	44.7093	68.1877	59.9073
b0686	ybfF	363.517	-0.271529	0.174922	-1.55229	0.120592	0.296821	369.804	438.355	384.506	333.19	322.431	332.818
b0687	seqA	1166.04	-0.333312	0.196557	-1.69575	0.0899333	0.243241	1336.99	1278.94	1284.14	1008.09	1212.77	875.312
b0688	pgm	4624.65	-0.214717	0.196248	-1.09411	0.273907	0.505106	5285.58	4790.67	4827.92	4239.93	4995.24	3608.58
b0689	ybfP	12.9611	0.795681	0.666927	1.19306	0.232848	0.460045	16.4114	7.81034	4.21376	15.9676	23.3786	9.98455
b0691	ybfG	7.41247	1.71485	0.740965	2.31435	0.0206486	0.083822	4.37638	3.90517	2.10688	8.51605	15.5858	9.98455
b0692	potE	69.7686	-0.255561	0.351847	-0.726341	0.46763	0.68286	89.7159	58.5775	80.0615	44.7093	62.3431	83.2046
b0693	speF	40.7579	-0.582831	0.350285	-1.66387	0.0961375	0.255682	50.3284	60.5301	35.817	29.8062	33.1198	34.9459
b0694	kdpE	88.8672	-0.127197	0.386964	-0.328704	0.742379	0.875065	112.692	83.9611	82.1683	72.3864	55.5243	126.471
b0695	kdpD	644.503	-0.209943	0.251115	-0.836046	0.403129	0.631464	714.445	704.883	655.24	531.189	484.133	777.131
b0696	kdpC	45.4105	-0.0835665	0.400977	-0.208407	0.834911	0.921609	45.952	57.6012	36.8704	26.6127	49.6796	55.7471
b0697	kdpB	55.294	-0.103	0.36046	-0.285746	0.775073	0.89365	53.6107	78.1034	40.0307	44.7093	60.3948	54.915
b0698	kdpA	9.93593	-0.619791	0.699475	-0.886081	0.375574	0.606939	17.5055	5.85775	12.6413	12.7741	5.84466	4.99228
b0699	ybfA	2536.87	3.91927	0.329475	11.8955	1.24874e-32	5.87463e-30	249.454	321.2	372.918	3796.03	6785.65	3695.95
b0700	rhsC	381.408	0.838691	0.298002	2.81438	0.00488714	0.0271551	271.336	290.935	258.093	501.382	638.042	328.658
b0702	ybfB	6.41626	0.893647	0.7866	1.13609	0.25592	0.486685	2.18819	4.88146	6.32064	7.45154	12.6634	4.99228
b0703	ybfO	45.1314	0.0180235	0.391575	0.0460282	0.963288	0.981839	38.2934	65.4116	30.5498	51.0963	43.835	41.6023
b0704	ybfC	30.385	1.99955	0.432955	4.61836	3.86778e-06	6.15646e-05	10.941	10.7392	14.7482	47.9028	61.369	36.61
b0705	ybfL	25.8255	2.34552	0.679535	3.45166	0.000557151	0.00478495	13.1292	1.95258	10.5344	42.5802	64.2913	22.4652
b0706	ybfD	32.7431	1.29294	0.622171	2.07812	0.0376987	0.131264	10.941	20.5021	25.2826	71.3219	52.602	15.8089
b0707	ybgA	2445.13	0.643691	0.183202	3.51356	0.000442149	0.00395784	2180.53	1710.46	1835.09	2982.75	2757.71	3204.21
b0708	phr	1247.36	0.325285	0.167406	1.94308	0.0520061	0.165559	1180.53	1077.83	1063.97	1416.86	1243.94	1501.01
b0709	dtpD	268.938	0.175193	0.176072	0.995007	0.319733	0.554134	249.454	261.646	246.505	305.513	271.777	278.735
b0710	ybgI	3880.11	-0.144886	0.243206	-0.595734	0.551353	0.745823	4742.91	3873.93	3608.03	3602.29	2955.45	4498.04
b0711	pxpB	3612.43	-0.10091	0.253402	-0.398222	0.690466	0.840792	4319.49	3582.02	3315.18	3389.39	2717.77	4350.77
b0712	pxpC	5141.45	-0.126631	0.255633	-0.495361	0.620346	0.794959	6310.75	5106.98	4683.6	4862.66	3822.41	6062.29
b0713	pxpA	1693.19	-0.0799651	0.262791	-0.304292	0.760906	0.885026	1979.22	1689.96	1551.72	1515.86	1290.7	2131.7
b0714	nei	416.749	0.236549	0.201943	1.17137	0.241452	0.470027	358.864	363.181	425.59	469.447	494.848	388.565
b0715	abrB	211.816	-0.0883213	0.314335	-0.280978	0.778727	0.895478	191.467	205.021	258.093	202.256	271.777	142.28
b0716	ybgO	50.3482	0.216017	0.382606	0.564595	0.572349	0.762436	42.6697	34.1702	63.2064	51.0963	41.8867	69.0598
b0717	ybgP	11.2405	0.599687	0.614472	0.975938	0.329095	0.563897	9.84687	10.7392	6.32064	12.7741	7.79288	19.9691
b0718	ybgQ	41.1634	0.0684144	0.380908	0.179609	0.85746	0.928679	35.0111	46.862	38.9773	30.8707	37.0162	58.2432
b0719	ybgD	4.71061	-1.33572	1.0692	-1.24926	0.211569	0.434634	8.75277	2.92888	8.42752	4.25802	3.89644	0
b0720	gltA	61621	-1.33872	0.43467	-3.07985	0.00207103	0.0138527	90107.6	92965.5	81893.4	44784.8	14293.1	45681.8
b0721	sdhC	3235.98	-2.55984	0.370524	-6.9087	4.89115e-12	2.79853e-10	4019.71	6184.81	6395.44	1392.37	615.638	807.917
b0722	sdhD	2460.95	-2.53512	0.340209	-7.45166	9.21711e-14	7.0955e-12	3425.61	4703.78	4463.43	979.346	436.401	757.162
b0723	sdhA	20970.2	-2.39058	0.375896	-6.35969	2.02159e-10	8.82413e-09	28653.3	39668.7	37347.6	8615.05	3505.82	8030.91
b0724	sdhB	9120.99	-1.98446	0.392822	-5.0518	4.3767e-07	9.35907e-06	12593	16213.3	14879.8	4634.86	1772.88	4632
b0726	sucA	42785.1	-0.988924	0.415538	-2.37987	0.0173189	0.0724586	67369	54494.7	48838.5	36654.1	12996.6	36357.9
b0727	sucB	20575.3	-0.483322	0.436148	-1.10816	0.267792	0.499288	33799.9	19880.2	18289.8	22507.9	8321.83	20652.2
b0728	sucC	23284.8	-0.435451	0.490946	-0.886963	0.375099	0.606939	41441.1	20289.3	18586.9	26249.7	8737.77	24403.9
b0729	sucD	20623	-0.259922	0.51722	-0.502536	0.615291	0.792012	35887.4	16849.8	14690.2	25617.3	7810.42	22882.9
b0730	mngR	127.605	-0.0653191	0.240803	-0.271255	0.786195	0.896753	129.103	133.752	128.52	111.773	150.987	111.494
b0731	mngA	17.0091	0.0603363	0.477699	0.126306	0.89949	0.948789	19.6937	13.6681	16.855	14.9031	13.6375	23.2973
b0732	mngB	163.401	0.625425	0.243669	2.5667	0.010267	0.0490086	158.644	109.345	117.985	183.095	207.486	203.851
b0733	cydA	19223.6	1.33293	0.190069	7.01289	2.33439e-12	1.39209e-10	12136.8	9143.95	11495.1	26787.2	29609.1	26169.5
b0734	cydB	12371	1.09849	0.307634	3.57076	0.000355944	0.00327624	5460.63	8045.62	10122.5	16596.7	20547.9	13452.5
b0735	ybgE	293.961	0.755884	0.45298	1.66869	0.0951781	0.253768	130.197	241.144	284.429	326.803	569.855	211.34
b0736	ybgC	147.856	0.0302497	0.281734	0.10737	0.914496	0.956279	144.421	162.065	132.733	106.451	173.392	168.073
b0737	tolQ	126.143	0.536648	0.262846	2.04168	0.0411834	0.140963	125.821	92.7478	90.5959	127.741	168.521	151.432
b0738	tolR	71.6428	0.149731	0.292138	0.512533	0.608278	0.785908	80.9631	55.6487	67.4202	64.9349	87.6699	73.22
b0739	tolA	276.523	-0.0122452	0.209387	-0.058481	0.953366	0.9769	272.43	269.457	291.803	240.578	262.036	322.834
b0740	tolB	1601.72	-0.0718152	0.203575	-0.35277	0.724261	0.861139	1387.31	1724.13	1812.97	1489.24	1768.01	1428.62
b0741	pal	3345.85	0.330576	0.207612	1.59228	0.111322	0.280891	2808.54	3155.38	2928.56	3208.42	4512.08	3462.14
b0742	cpoB	1618.76	0.265558	0.16497	1.60974	0.107455	0.27357	1365.43	1563.04	1482.19	1768.14	1615.08	1918.7
b0743	lysT	661.904	-0.25103	0.291864	-0.860091	0.389739	0.618962	470.461	868.9	818.523	554.608	650.706	608.226
b0744	valT	159.555	-0.182374	0.29449	-0.61929	0.535726	0.733828	119.256	202.092	187.512	125.612	165.599	157.257
b0745	lysW	145.055	0.0509173	0.303527	0.167752	0.866779	0.933115	95.1864	183.543	148.535	143.708	147.091	152.264
b0746	valZ	272.18	-0.205274	0.315588	-0.650449	0.515402	0.719753	183.808	327.058	363.437	244.836	283.466	230.477
b0747	lysY	16.3773	-2.20907	0.743956	-2.96935	0.00298431	0.0186091	7.65867	37.0991	35.817	8.51605	5.84466	3.32818
b0748	lysZ	103.683	-0.911315	0.354972	-2.56729	0.0102498	0.0489816	86.4336	139.61	180.138	59.6123	84.7476	71.556
b0749	lysQ	8.91447	-1.47389	0.805295	-1.83025	0.0672131	0.199146	8.75277	12.6918	17.9085	1.06451	9.7411	3.32818
b0750	nadA	279.761	-0.557762	0.192878	-2.89179	0.00383056	0.0225885	300.876	345.607	352.902	241.643	204.563	232.973
b0751	pnuC	454.679	0.236418	0.218864	1.08021	0.280049	0.512416	504.378	351.465	397.147	485.415	464.651	525.021
b0752	zitB	495.01	0.0880221	0.308025	0.285763	0.77506	0.89365	582.059	458.857	399.254	496.06	362.369	671.461
b0753	ybgS	7438.23	0.406012	0.556649	0.729385	0.465766	0.680957	8038.32	5807.96	5349.37	5597.17	3267.17	16569.4
b0754	aroG	2605.21	-0.264674	0.167295	-1.58208	0.113631	0.284538	2565.66	3043.1	2921.19	2416.43	2519.05	2165.82
b0755	gpmA	15074.6	-0.631828	0.295031	-2.14157	0.0322283	0.116088	20745.2	17802.7	16424.2	11507.3	8162.07	15806.4
b0756	galM	3952.06	0.0635179	0.169463	0.374818	0.707796	0.853792	4095.2	3850.5	3649.12	4172.86	4389.34	3555.33
b0757	galK	2525.7	-0.0866332	0.239656	-0.361491	0.717733	0.858441	2276.81	2763.88	2763.17	2699.59	2792.77	1857.96
b0758	galT	1537.08	0.037703	0.230813	0.163348	0.870244	0.935656	1372	1599.17	1579.11	1828.82	1639.43	1203.97
b0759	galE	2685.4	0.0497042	0.232841	0.213469	0.830961	0.920296	2652.09	2723.86	2540.9	3016.81	3138.58	2040.18
b0760	modF	377.404	-0.147202	0.206932	-0.711354	0.476865	0.690981	401.533	400.28	388.719	325.739	320.482	427.672
b0761	modE	590.506	-0.324089	0.150486	-2.15361	0.0312708	0.113587	645.517	643.377	680.522	547.156	517.253	509.212
b0762	acrZ	632.024	-0.304477	0.202933	-1.50038	0.133515	0.31723	601.753	730.267	763.744	498.189	570.829	627.363
b0763	modA	357.938	-0.480841	0.32671	-1.47177	0.141084	0.327853	358.864	470.573	421.376	258.675	427.634	210.508
b0764	modB	119.235	-0.721589	0.266088	-2.71184	0.00669102	0.0347605	158.644	168.899	117.985	76.6444	98.3852	94.8532
b0765	modC	201.83	-0.160986	0.213293	-0.754764	0.45039	0.66756	226.478	227.476	185.405	194.805	170.469	206.347
b0766	ybhA	160.658	-0.199815	0.250118	-0.79888	0.42436	0.648755	165.209	184.519	165.39	131.999	187.029	129.799
b0767	pgl	8310.64	0.337896	0.142392	2.37299	0.0176448	0.0734592	6783.4	7416.89	7824.95	9409.17	9376.79	9052.66
b0768	ybhD	30.6785	-0.527931	0.42521	-1.24158	0.214393	0.438513	47.0461	28.3125	33.7101	15.9676	28.2492	30.7857
b0769	ybhH	3.12975	-0.404101	1.24586	-0.324355	0.745669	NA	6.56458	1.95258	2.10688	4.25802	3.89644	0
b0770	ybhI	8.53084	0.0746676	0.686602	0.108749	0.913401	0.956039	6.56458	9.76292	8.42752	14.9031	4.87055	6.65637
b0771	ybhJ	91.0651	-0.687014	0.285413	-2.40709	0.0160804	0.0681994	99.5627	143.515	93.7562	68.1284	74.0324	67.3957
b0772	ybhC	270.973	-0.385663	0.269335	-1.43191	0.152169	0.344906	388.404	266.528	266.52	190.547	254.243	259.598
b0773	ybhB	1978.63	0.720361	0.155534	4.63152	3.62984e-06	5.84363e-05	1600.66	1459.56	1424.25	2270.59	2530.74	2586
b0774	bioA	42.2123	-0.78257	0.338923	-2.30899	0.0209441	0.0845351	41.5757	61.5064	56.8858	29.8062	36.0421	27.4575
b0775	bioB	56.7403	-0.512269	0.296888	-1.72546	0.0844439	0.232194	61.2694	64.4353	74.7943	39.3867	44.8091	55.7471
b0776	bioF	38.8862	-0.323299	0.437989	-0.738146	0.460426	0.67642	30.6347	58.5775	40.0307	50.0318	28.2492	25.7934
b0777	bioC	73.0278	1.66816	0.379221	4.39893	1.08787e-05	0.000153535	43.7638	26.3599	34.7635	137.321	122.738	73.22
b0778	bioD	41.8439	0.989538	0.371007	2.66717	0.00764931	0.0388336	24.0701	27.3362	32.6566	44.7093	74.0324	48.2587
b0779	uvrB	2745.85	-0.176527	0.191553	-0.921553	0.356762	0.58936	3333.71	2620.37	2787.4	2536.72	2338.84	2858.08
b0780	ybhK	321.555	0.121412	0.168843	0.719081	0.472091	0.686648	324.947	295.817	303.391	329.997	350.68	324.498
b0781	moaA	2549.96	0.178994	0.137522	1.30157	0.193063	0.408626	2286.66	2434.87	2454.52	2684.68	2606.72	2832.28
b0782	moaB	1841.51	0.883244	0.211293	4.18019	2.9127e-05	0.000363787	1341.36	1283.82	1258.86	2438.78	2808.36	1917.87
b0783	moaC	853.297	0.611839	0.240866	2.54017	0.01108	0.0520096	655.364	696.096	673.148	1101.76	1225.43	767.978
b0784	moaD	497.346	0.796996	0.251165	3.17319	0.00150773	0.0107109	331.511	305.579	452.979	613.156	732.531	548.318
b0785	moaE	702.192	0.727088	0.225716	3.22125	0.00127631	0.0093818	570.024	467.644	548.842	958.056	972.162	696.423
b0786	ybhL	8919.69	0.259294	0.210799	1.23005	0.218677	0.444578	9439.86	7910.9	7010.64	8697.01	9314.44	11145.3
b0787	ybhM	60.3931	1.06833	0.369141	2.89411	0.0038024	0.0224851	47.0461	29.2888	41.0842	67.0639	67.2136	110.662
b0788	ybhN	163.894	0.0679248	0.301911	0.224983	0.821993	0.916114	167.397	143.515	169.604	167.127	116.893	218.828
b0789	clsB	837.817	0.510379	0.304463	1.67633	0.093674	0.250389	899.347	614.088	560.43	966.572	744.22	1242.24
b0790	ybhP	711.225	0.558727	0.324337	1.72267	0.084948	0.233249	736.327	553.558	436.124	772.831	636.094	1132.41
b0791	ybhQ	1437.7	-1.00949	0.291012	-3.4689	0.000522593	0.00451563	2572.22	1710.46	1481.14	943.152	796.822	1122.43
b0792	ybhR	579.958	-0.52872	0.211208	-2.50331	0.0123037	0.0564398	800.878	589.681	664.721	454.544	528.942	440.984
b0793	ybhS	562.594	-0.476131	0.172158	-2.76567	0.00568066	0.0306138	708.974	642.4	612.049	502.447	475.366	434.328
b0794	ybhF	2163.67	-0.625297	0.171605	-3.64382	0.000268616	0.00259663	2626.92	2757.05	2491.39	1786.24	1835.22	1485.2
b0795	ybhG	2718.16	-0.671239	0.254868	-2.63367	0.00844673	0.0420747	2579.88	3756.77	3680.72	2242.91	2367.09	1681.56
b0796	cecR	1790.59	-0.759498	0.27654	-2.74643	0.00602472	0.031846	1526.26	2530.55	2696.81	1443.47	1315.05	1231.43
b0797	rhlE	199.833	-0.538042	0.218148	-2.4664	0.0136477	0.0604441	238.513	261.646	209.635	154.353	185.081	149.768
b0798	ybiA	382.526	-0.848376	0.242281	-3.50162	0.000462434	0.00409612	460.614	496.933	517.239	326.803	286.388	207.179
b0799	dinG	1113.97	-0.499176	0.165163	-3.02232	0.00250846	0.0161411	1190.38	1368.76	1354.72	1000.64	875.725	893.617
b0800	ybiB	3009.21	-0.07415	0.24927	-0.297468	0.766109	0.887714	3736.34	2899.59	2624.12	2883.75	2400.21	3511.23
b0801	hcxB	1997.29	-0.407142	0.203892	-1.99685	0.0458414	0.151898	2291.04	2276.71	2263.84	1995.95	1388.11	1768.1
b0802	ybiJ	660.781	0.414341	0.358783	1.15485	0.248152	0.479104	633.482	526.222	540.415	603.575	503.615	1157.38
b0803	ybiI	299.2	-0.309358	0.238348	-1.29792	0.194313	0.410745	320.57	320.224	352.902	287.417	204.563	309.521
b0804	ybiX	117.649	-0.55986	0.218896	-2.55765	0.0105383	0.0500214	138.95	130.823	150.642	101.128	94.4887	89.861
b0805	fiu	102.721	0.0285734	0.289294	0.0987693	0.921321	0.960334	99.5627	114.226	91.6493	75.5799	112.997	122.311
b0806	mcbA	408.065	0.214472	0.244101	0.87862	0.379608	0.609503	393.875	352.441	387.666	390.674	366.266	557.471
b0807	rlmF	177.977	-0.237064	0.252943	-0.937221	0.348645	0.582313	152.079	188.424	237.024	162.869	174.366	153.096
b0808	ybiO	713.266	-0.085889	0.20068	-0.427989	0.668659	0.827737	769.15	689.262	745.836	601.446	658.499	815.405
b0809	glnQ	780.679	-0.805311	0.217496	-3.70265	0.000213361	0.00211562	920.135	1051.47	1007.09	563.124	677.981	464.282
b0810	glnP	500.071	-0.981838	0.173017	-5.6748	1.38854e-08	4.19588e-07	689.281	648.258	654.186	367.255	301.974	339.475
b0811	glnH	9093.4	-1.76932	0.32675	-5.4149	6.13239e-08	1.57361e-06	8500.03	16382.2	17302.8	4817.95	3976.32	3581.13
b0812	dps	192606	0.0986825	0.356749	0.276616	0.782075	0.896747	232367	171228	154470	178516	128580	290477
b0813	rhtA	39.4482	-0.329535	0.42931	-0.767592	0.44273	0.661439	37.1993	55.6487	38.9773	40.4512	19.4822	44.9305
b0814	ompX	22802.8	0.450725	0.392337	1.14882	0.250629	0.480693	9319.51	24795.9	23692.9	23076.4	26005.8	29926.2
b0815	opgE	85.8906	-0.0711771	0.287683	-0.247416	0.804587	0.906016	72.2103	82.0085	109.558	89.4185	90.5923	71.556
b0817	mntR	149.481	-0.683373	0.270824	-2.52331	0.0116254	0.0539125	154.268	178.661	220.169	106.451	98.3852	138.952
b0818	ybiR	121.008	-0.753812	0.290527	-2.59463	0.00946917	0.0460833	130.197	139.61	186.459	74.5154	83.7735	111.494
b0819	ldtB	500.005	0.0964505	0.226949	0.424987	0.670846	0.828819	570.024	442.26	438.231	470.512	472.444	606.562
b0820	ybiT	506.698	-0.527922	0.272993	-1.93383	0.0531345	0.167819	731.95	567.226	496.17	336.384	518.227	390.23
b0821	ybiU	151.456	-0.361775	0.281704	-1.28424	0.199059	0.417855	187.09	188.424	135.894	123.483	109.1	164.745
b0822	ybiV	126.172	0.163758	0.270928	0.604436	0.545554	0.741234	136.762	127.894	92.7027	112.838	135.401	151.432
b0823	ybiW	363.008	0.500882	0.208003	2.40805	0.0160381	0.0681628	297.594	274.338	329.727	436.448	476.34	363.604
b0824	ybiY	25.8038	0.679055	0.443777	1.53017	0.125974	0.30496	26.2583	18.5496	14.7482	26.6127	42.8609	25.7934
b0825	fsaA	226.32	-0.196134	0.217714	-0.900879	0.367653	0.5994	236.325	210.879	278.108	190.547	229.89	212.172
b0826	moeB	681.147	-0.543404	0.267767	-2.02939	0.0424186	0.144142	580.965	933.335	909.119	547.156	631.224	485.083
b0827	moeA	1365.94	-0.722167	0.185026	-3.90306	9.49849e-05	0.00103385	1438.74	1868.62	1795.06	987.862	1074.44	1030.91
b0828	iaaA	1840.43	-0.711494	0.690365	-1.03061	0.302725	0.539453	4985.8	940.169	930.188	820.734	1050.09	2315.58
b0829	gsiA	3330.31	-0.00565303	0.63799	-0.00886069	0.99293	0.997041	6945.32	1612.83	1452.69	2053.43	2657.37	5260.19
b0830	gsiB	2613.03	0.275398	0.496248	0.55496	0.578922	0.766705	4285.57	1379.5	1428.46	2132.21	2566.78	3885.65
b0831	gsiC	296.552	0.489965	0.498221	0.983429	0.325396	0.560279	455.144	136.681	148.535	286.352	322.431	430.168
b0832	gsiD	292.809	0.636685	0.44502	1.43069	0.152519	0.345239	400.439	147.42	140.108	315.094	387.696	366.1
b0833	pdeI	26.0128	1.34772	0.58292	2.31201	0.020777	0.0841717	13.1292	7.81034	23.1757	23.4191	59.4207	29.1216
b0834	dgcI	15.4642	0.286615	0.705445	0.40629	0.68453	0.837175	17.5055	11.7155	12.6413	5.32253	33.1198	12.4807
b0835	rimO	61.0406	-0.0259845	0.330098	-0.0787175	0.937257	0.968126	59.0812	66.3879	58.9927	59.6123	78.9029	43.2664
b0836	bssR	2420.09	0.89302	0.204914	4.35803	1.3124e-05	0.000182786	1419.04	1779.78	1883.55	3000.84	2885.32	3552
b0837	yliI	419.725	0.767449	0.34291	2.23804	0.0252181	0.0975992	426.697	226.5	279.162	541.834	381.851	662.309
b0838	gstB	1472.75	-0.0369403	0.177578	-0.208023	0.835211	0.921609	1440.92	1497.63	1535.92	1649.98	1275.11	1436.94
b0839	dacC	5116.56	1.07982	0.146423	7.37469	1.6473e-13	1.18215e-11	3479.23	3298.89	3081.31	6972.52	6564.53	7302.87
b0840	deoR	386.601	0.250937	0.197295	1.27189	0.203414	0.424222	373.087	335.845	350.796	355.545	450.039	454.297
b0841	ybjG	279.262	2.67431	0.391998	6.82226	8.96221e-12	4.92805e-10	59.0812	91.7715	75.8477	415.157	726.686	307.025
b0842	mdfA	136.921	0.397279	0.274091	1.44944	0.147214	0.336738	133.48	116.179	105.344	141.579	128.583	196.363
b0843	ybjH	46.0565	0.0253028	0.398084	0.0635615	0.949319	0.974421	37.1993	46.862	52.672	42.5802	66.2395	30.7857
b0844	ybjI	201.433	-0.28024	0.245996	-1.13921	0.254617	0.486265	179.432	258.717	224.383	201.192	156.832	188.042
b0845	ybjJ	145.151	-0.461868	0.216163	-2.13666	0.0326256	0.116571	166.303	182.567	155.909	108.58	128.583	128.967
b0846	rcdA	254.268	-0.765312	0.216667	-3.5322	0.000412122	0.00372847	292.124	311.437	357.116	197.998	159.754	207.179
b0847	ybjL	383.839	0.395364	0.19608	2.01634	0.0437649	0.147257	282.277	360.252	351.849	426.867	466.599	415.191
b0848	ybjM	38.5592	1.4465	0.595792	2.42787	0.015188	0.0652852	13.1292	21.4784	27.3894	40.4512	102.282	26.6255
b0849	grxA	86.9779	0.492778	0.460439	1.07023	0.284514	0.516994	32.8229	101.534	82.1683	93.6765	133.453	78.2123
b0850	ybjC	2344.6	-0.955625	0.266891	-3.58058	0.000342832	0.00318654	2253.84	3293.03	3734.45	1670.21	1774.83	1341.26
b0851	nfsA	5578.5	-0.981367	0.194568	-5.04382	4.56333e-07	9.70911e-06	6561.29	7456.92	8198.93	3839.67	4169.19	3244.98
b0852	rimK	2426.61	-0.81091	0.230138	-3.52358	0.000425752	0.0038354	2529.55	3328.18	3415.25	1801.14	2020.31	1465.23
b0853	ybjN	924.23	-0.344844	0.230361	-1.49697	0.134401	0.318512	967.181	1072.95	1061.87	810.089	992.619	640.675
b0854	potF	568.085	-1.27269	0.444055	-2.86606	0.00415616	0.0237159	1000	763.461	647.866	265.062	176.314	555.807
b0855	potG	176.136	-1.25859	0.498559	-2.52445	0.0115878	0.0538561	277.9	236.263	231.757	67.0639	51.6279	192.203
b0856	potH	66.293	-0.730603	0.63936	-1.14271	0.253159	0.483916	96.2805	71.2693	81.1149	18.0966	25.3269	105.67
b0857	potI	58.7433	-0.134897	0.668188	-0.201885	0.840007	0.923121	78.7749	57.6012	48.4583	25.5481	21.4304	120.647
b0858	ybjO	151.723	-0.0811798	0.257116	-0.315732	0.752206	0.881097	166.303	153.278	148.535	163.934	111.049	167.241
b0859	rlmC	82.1166	-0.0411826	0.302039	-0.136349	0.891546	0.945119	86.4336	60.5301	103.237	73.4509	80.8512	88.1969
b0860	artJ	211.567	0.939675	0.312775	3.00432	0.00266176	0.0169727	180.526	93.7241	161.176	283.159	239.631	311.185
b0861	artM	946.724	0.333998	0.140596	2.37559	0.0175208	0.0731726	815.102	842.54	855.393	1018.73	1062.75	1085.82
b0862	artQ	792.04	0.304092	0.166773	1.82339	0.0682448	0.201003	681.622	762.484	682.629	860.121	814.356	951.029
b0863	artI	4972.56	0.316209	0.143132	2.20922	0.0271596	0.102946	4414.68	4515.35	4359.14	5353.4	5974.22	5218.59
b0864	artP	2278.06	0.00708157	0.238924	0.0296395	0.976355	0.988968	2588.63	2176.16	2053.16	2218.43	1831.33	2800.67
b0865	ybjP	16599.4	0.0682583	0.27365	0.249437	0.803023	0.905229	20301	14646.3	13673.7	16967.2	13238.2	20770.4
b0866	ybjQ	1239.46	-0.0966588	0.244608	-0.395157	0.692727	0.842575	1482.5	1304.33	1056.6	1100.7	1031.58	1461.07
b0867	amiD	2417.34	-0.0648623	0.282369	-0.229708	0.818319	0.914407	2826.05	2390.94	2198.53	2255.69	1719.3	3113.52
b0868	ybjS	371.132	-0.18364	0.275733	-0.666008	0.505406	0.711098	408.098	385.635	390.826	353.416	244.502	444.313
b0869	ybjT	1079.73	-0.196425	0.287257	-0.683797	0.494103	0.702452	1338.08	1049.51	1072.4	898.443	763.703	1356.24
b0870	ltaE	4737.3	-0.493991	0.335942	-1.47046	0.141436	0.328312	6161.95	5111.87	5348.32	3491.58	2553.14	5756.93
b0871	poxB	53256.1	-0.568369	0.375457	-1.51381	0.130075	0.311359	81572.5	56270.6	52996.5	39392	26117.8	63187.2
b0872	hcr	8270.35	6.38765	0.747377	8.54676	1.26589e-17	1.62417e-15	103.939	169.875	311.818	17087.5	29633.4	2315.58
b0873	hcp	20934.3	6.24357	0.73424	8.50345	1.84038e-17	2.22633e-15	176.149	321.2	1138.77	40769.5	70107.7	13092.2
b0874	lysO	38.6303	0.714314	0.385253	1.85414	0.0637191	0.191203	30.6347	19.5258	37.9238	39.3867	47.7314	56.5791
b0875	aqpZ	45.593	0.108148	0.379135	0.285249	0.775453	0.89365	45.952	44.9094	41.0842	44.7093	31.1715	65.7316
b0876	ybjD	992.557	0.251524	0.160571	1.56643	0.117247	0.291319	948.581	854.256	916.493	1043.22	1017.95	1174.85
b0877	ybjX	2048.41	2.85378	0.250062	11.4123	3.63069e-30	1.28103e-27	382.934	643.377	466.674	3434.1	3592.52	3770.83
b0878	macA	448.008	-0.2183	0.259259	-0.842016	0.399779	0.629477	492.343	476.431	477.208	407.706	306.845	527.517
b0879	macB	573.406	-0.847321	0.275993	-3.07008	0.00213999	0.0141471	724.292	757.603	730.034	386.416	297.104	544.99
b0880	cspD	20506.6	0.593299	0.298882	1.98506	0.0471379	0.154619	21171.9	14545.8	13328.1	25477.9	18230.5	30285.6
b0881	clpS	210.142	-0.320007	0.219485	-1.45799	0.144843	0.333403	211.161	232.358	255.986	212.901	187.029	161.417
b0882	clpA	46576.6	0.0224687	0.279793	0.0803046	0.935995	0.96747	50266.1	45941.4	42434.7	51135.7	31651.8	58030.2
b0883	serW	19.7752	0.105287	0.708458	0.148615	0.881857	0.941889	4.37638	25.3836	27.3894	10.6451	29.2233	21.6332
b0884	infA	314.897	-0.252815	0.341578	-0.740138	0.459216	0.675837	219.913	437.379	369.758	239.514	368.214	254.606
b0885	aat	156.724	0.173878	0.24399	0.712643	0.476066	0.690478	167.397	131.799	143.268	143.708	157.806	196.363
b0886	cydC	412.741	0.214646	0.246373	0.871226	0.383631	0.613328	294.312	407.114	444.552	428.996	504.589	396.886
b0887	cydD	329.606	0.339788	0.264958	1.28242	0.199694	0.418744	319.476	288.983	264.414	314.029	481.211	309.521
b0888	trxB	783.403	0.0140405	0.352021	0.0398854	0.968184	0.984177	637.858	916.738	783.76	771.767	1108.54	481.755
b0889	lrp	1346.88	0.191909	0.149146	1.28672	0.198193	0.416657	1352.3	1210.6	1209.35	1460.5	1474.8	1373.71
b0890	ftsK	6735.02	-0.151384	0.148592	-1.01879	0.308301	0.544347	7091.93	7044.92	7127.58	6537.13	5777.45	6831.1
b0891	lolA	1296.69	-0.114171	0.171316	-0.666434	0.505134	0.711098	1274.62	1375.6	1393.7	1318.92	1091	1326.28
b0892	rarA	885.975	-0.0294408	0.207358	-0.14198	0.887096	0.942998	954.052	844.493	886.997	880.347	725.712	1024.25
b0893	serS	7703.29	-0.114149	0.202235	-0.564437	0.572457	0.762436	6957.36	8288.72	8777.26	6972.52	8585.81	6638.06
b0894	dmsA	6317.98	2.58264	0.407464	6.33832	2.32288e-10	1.00358e-08	1615.98	1603.07	2203.8	10866.5	16159.5	5459.05
b0895	dmsB	744.967	3.19368	0.573509	5.56868	2.56683e-08	7.14996e-07	110.504	104.463	225.436	1383.86	2205.39	440.152
b0896	dmsC	506.689	2.65394	0.556112	4.77232	1.82119e-06	3.16021e-05	117.068	113.25	186.459	885.669	1463.11	274.575
b0897	ycaC	7539.18	0.397068	0.186051	2.13419	0.0328269	0.117093	6630.22	6724.7	6170	8490.5	7351.61	9868.07
b0898	ycaD	49.8882	0.539034	0.388536	1.38735	0.165336	0.3646	25.1642	41.9806	54.7789	51.0963	73.0583	53.2509
b0899	ycaM	38.7778	-0.00938065	0.489183	-0.0191762	0.984701	0.993618	49.2343	41.0043	26.336	34.0642	60.3948	21.6332
b0900	ycaN	54.3367	0.867503	0.347395	2.49717	0.012519	0.0569907	45.952	36.1228	33.7101	57.4833	60.3948	92.3571
b0901	ycaK	18.2895	1.06846	0.727845	1.46798	0.14211	0.329516	2.18819	21.4784	11.5878	19.1611	37.0162	18.305
b0902	pflA	1557.47	0.345511	0.142737	2.42061	0.0154945	0.0663332	1375.28	1419.53	1321.01	1659.57	1733.92	1835.49
b0903	pflB	44107.3	1.63917	0.488395	3.35625	0.000790069	0.00629972	17874.2	22493.8	23945.8	55128.6	117310	27891
b0904	focA	1303.51	1.95768	0.243767	8.03093	9.67366e-16	9.75197e-14	623.635	476.431	501.438	1809.66	2573.6	1836.33
b0905	ycaO	103.984	0.386507	0.261589	1.47754	0.139532	0.325676	90.81	82.9848	96.9165	93.6765	136.375	123.143
b0906	ycaP	405.382	0.806034	0.240155	3.3563	0.000789925	0.00629972	371.993	277.267	235.971	526.931	490.952	529.181
b0907	serC	1589.19	0.0928081	0.144748	0.64117	0.521412	0.723823	1494.54	1550.35	1569.63	1525.44	1720.28	1674.91
b0908	aroA	271.909	0.295174	0.246996	1.19506	0.232065	0.459142	254.924	216.737	261.253	235.256	360.421	302.865
b0909	ycaL	68.2878	-0.421289	0.2827	-1.49023	0.136163	0.320999	87.5277	85.9137	61.0995	59.6123	56.4984	59.0753
b0910	cmk	893.248	0.520902	0.274406	1.89829	0.0576585	0.178585	955.146	649.234	597.301	927.185	969.24	1261.38
b0911	rpsA	8548.93	0.290869	0.193402	1.50396	0.132592	0.315568	7993.47	7532.09	7544.74	8088.12	11134.1	9001.07
b0912	ihfB	7212.57	0.426831	0.297329	1.43555	0.151129	0.3431	7461.74	5707.4	5291.43	7325.93	6305.42	11183.5
b0913	ycaI	195.263	-0.253074	0.283267	-0.893411	0.371637	0.604035	237.419	200.14	200.154	144.773	151.961	237.133
b0914	msbA	570.966	-0.540569	0.163528	-3.30567	0.000947486	0.00736083	685.998	719.527	624.69	441.77	481.211	472.602
b0915	lpxK	188.983	-0.17365	0.291865	-0.594967	0.551866	0.746279	217.725	210.879	172.764	177.773	127.608	227.149
b0916	ycaQ	98.8424	-0.446277	0.298213	-1.4965	0.134523	0.318512	88.6218	137.657	115.878	65.9994	92.5405	92.3571
b0917	ycaR	116.752	-1.46487	0.439252	-3.33492	0.000853239	0.00675255	117.068	172.804	224.383	37.2577	97.411	51.5869
b0918	kdsB	1231.39	-0.758131	0.173151	-4.37844	1.19531e-05	0.000167581	1438.74	1632.36	1571.73	996.378	811.434	937.716
b0919	ycbJ	3098.49	0.972907	0.178419	5.45295	4.95422e-08	1.28688e-06	2003.29	2165.42	2105.83	3895.03	4731.25	3690.12
b0920	elyC	119.295	0.566588	0.351693	1.61103	0.107173	0.273255	72.2103	78.1034	138.001	171.385	141.246	114.822
b0921	cmoM	391.311	-0.517052	0.171868	-3.00843	0.00262602	0.0167701	472.65	490.099	419.269	314.029	333.146	318.674
b0922	mukF	514.844	-0.389318	0.198678	-1.95954	0.0500494	0.160903	528.448	633.614	588.873	490.737	464.651	382.741
b0923	mukE	371.018	-0.411071	0.184766	-2.22482	0.0260931	0.0997996	387.31	467.644	415.055	334.255	327.301	294.544
b0924	mukB	3458.73	-0.175687	0.205901	-0.85326	0.393515	0.621986	3411.39	3692.34	3903	3235.03	3821.44	2689.17
b0925	ldtD	8663.65	0.423809	0.33654	1.25931	0.207918	0.429638	10176.2	6027.63	5997.24	9708.3	7179.19	12893.4
b0926	mepK	1218.01	0.257295	0.224114	1.14805	0.250946	0.48099	1379.66	991.913	957.577	1383.86	1374.47	1220.61
b0927	gloC	583.432	-0.267278	0.235486	-1.135	0.256373	0.486983	633.482	623.851	654.186	536.511	644.861	407.703
b0928	aspC	4856.99	0.123509	0.395498	0.312288	0.754822	0.881097	3601.76	5203.64	5141.84	5501.37	7097.37	2595.98
b0929	ompF	1129.55	-0.167128	0.286202	-0.58395	0.559254	0.753623	887.312	1371.69	1325.23	1075.15	1297.52	820.397
b0930	asnS	2388.23	-0.391392	0.152576	-2.56523	0.0103108	0.0491619	2467.19	2893.73	2769.49	2010.85	2147.91	2040.18
b0931	pncB	722.707	-0.2575	0.154447	-1.66724	0.0954675	0.25431	811.819	792.749	756.37	646.155	704.282	624.867
b0932	pepN	15282.6	-0.804239	0.167693	-4.7959	1.61946e-06	2.90542e-05	19929	19613.7	18762.8	12472.8	9832.67	11084.5
b0933	ssuB	109.561	-1.07932	0.314599	-3.43079	0.000601826	0.00509626	108.316	138.633	199.1	72.3864	74.0324	64.8996
b0934	ssuC	10.4544	-0.451655	0.820372	-0.550549	0.581943	0.769216	26.2583	5.85775	4.21376	6.38704	11.6893	8.32046
b0935	ssuD	34.9813	-0.555308	0.413896	-1.34166	0.179707	0.3886	56.893	35.1465	32.6566	37.2577	26.301	21.6332
b0936	ssuA	17.2352	0.43575	0.890702	0.489221	0.624686	0.798635	36.1052	5.85775	2.10688	21.2901	15.5858	22.4652
b0937	ssuE	16.4685	-0.36194	0.77776	-0.465362	0.641672	0.81169	41.5757	7.81034	6.32064	11.7096	15.5858	15.8089
b0938	elfA	101.127	0.622887	0.305923	2.03609	0.0417409	0.14241	85.3395	85.9137	67.4202	117.096	157.806	93.1892
b0939	elfD	8.38193	-0.452207	0.66935	-0.675591	0.4993	0.707359	10.941	12.6918	5.2672	9.58056	6.81877	4.99228
b0940	elfC	40.6644	0.0192823	0.377541	0.0510734	0.959267	0.98028	31.7288	38.0754	51.6186	36.1932	33.1198	53.2509
b0941	elfG	50.0094	0.159807	0.399094	0.400424	0.688844	0.839541	38.2934	61.5064	42.1376	36.1932	48.7055	73.22
b0942	ycbU	5.05937	-0.658632	1.16526	-0.565224	0.571922	0.762409	0	5.85775	12.6413	5.32253	4.87055	1.66409
b0943	ycbV	12.0377	-1.00525	1.00614	-0.99911	0.317742	0.551814	10.941	8.78663	28.4429	14.9031	0	9.15251
b0944	ycbF	198.075	-0.180444	0.254711	-0.708424	0.478682	0.692429	157.55	230.405	243.345	183.095	174.366	199.691
b0945	pyrD	48.6003	0.0698254	0.325723	0.21437	0.830258	0.920255	45.952	50.7672	45.2979	48.9673	62.3431	38.2741
b0946	zapC	442.971	0.225003	0.29027	0.775152	0.43825	0.66005	391.686	453.976	380.292	376.835	399.385	655.652
b0947	ycbX	367.55	-0.360589	0.201574	-1.78886	0.073637	0.212156	472.65	377.825	389.773	287.417	338.99	338.643
b0948	rlmL	349.529	0.270517	0.2347	1.15261	0.249072	0.479459	363.24	296.793	290.75	324.674	459.78	361.94
b0949	uup	695.381	0.259254	0.177492	1.46065	0.144112	0.332156	647.705	660.95	590.98	702.574	718.893	851.183
b0950	pqiA	378.832	0.11292	0.212688	0.530916	0.595477	0.7752	415.757	328.034	348.689	400.254	340.939	439.32
b0951	pqiB	490.769	0.30473	0.228553	1.3333	0.182433	0.392759	426.697	453	438.231	434.318	530.89	661.477
b0952	pqiC	133.964	0.335651	0.216391	1.55113	0.12087	0.296821	129.103	105.44	121.146	145.837	144.168	158.089
b0953	rmf	33764.3	0.748722	0.411313	1.82032	0.06871	0.202026	30783.5	22605.1	22194.9	35065.9	23722.5	68213.6
b0954	fabA	675.428	-0.632088	0.183207	-3.45013	0.000560312	0.00480156	820.572	785.915	857.5	463.06	528.942	596.577
b0955	ycbZ	2051.96	-0.375982	0.180251	-2.08588	0.0369893	0.129432	2377.47	2353.84	2222.76	1743.66	1566.37	2047.67
b0956	matP	385.074	-0.0291262	0.252142	-0.115515	0.908037	0.953529	282.277	445.189	439.285	371.513	371.136	401.046
b0957	ompA	176990	1.39281	0.212538	6.55322	5.63083e-11	2.64899e-09	80503.6	108928	103446	224327	257179	287560
b0958	sulA	1270.54	-0.000580252	0.187079	-0.00310164	0.997525	0.998476	1250.55	1288.71	1273.61	1231.63	1102.69	1476.05
b0959	sxy	294.216	0.12407	0.274283	0.452344	0.651021	0.817723	270.242	311.437	263.36	291.675	230.864	397.718
b0960	yccS	588.094	0.202918	0.166352	1.21981	0.222535	0.449296	522.978	549.653	567.804	656.8	569.855	661.477
b0961	yccF	62.8978	-0.304872	0.298288	-1.02207	0.306746	0.543416	79.869	68.3405	60.0461	68.1284	53.5761	47.4266
b0962	helD	1838.3	0.0336672	0.183354	0.183618	0.854313	0.927715	1878.56	1809.07	1763.46	1805.4	1625.79	2147.51
b0963	mgsA	4192.22	-0.330838	0.301109	-1.09873	0.271885	0.503569	3969.38	5449.66	4593	3288.26	5101.42	2751.58
b0964	yccT	249.447	0.376879	0.280794	1.34219	0.179533	0.388573	270.242	199.164	182.245	254.417	238.657	351.955
b0965	yccU	2410.2	0.188914	0.182933	1.03269	0.301747	0.538389	2176.16	2258.16	2323.89	2575.04	2202.46	2925.47
b0966	hspQ	2615.51	-0.470298	0.408775	-1.15051	0.249935	0.480139	3714.46	2901.54	2498.76	1936.34	1198.16	3443.84
b0967	rlmI	168.174	-0.264902	0.254564	-1.04061	0.298056	0.534053	225.384	169.875	155.909	131.999	157.806	168.073
b0968	yccX	305.945	-0.170805	0.278638	-0.612999	0.539877	0.736654	312.911	357.323	302.337	255.481	224.045	383.573
b0969	tusE	177.675	0.352928	0.331162	1.06573	0.286547	0.519103	189.279	144.491	134.84	178.837	143.194	275.407
b0970	yccA	7101.13	-0.165416	0.231344	-0.71502	0.474596	0.688909	9287.78	6847.71	6388.06	6130.49	7617.54	6335.2
b0971	serT	5.7023	-0.935293	0.840299	-1.11305	0.265688	0.496216	6.56458	9.76292	6.32064	2.12901	1.94822	7.48841
b0972	hyaA	2316.18	0.686733	0.2215	3.10038	0.00193273	0.0130513	2124.73	1565	1635.99	2954	2443.07	3174.26
b0973	hyaB	2674.79	0.446901	0.271057	1.64874	0.0992018	0.260397	3079.88	1899.86	1811.92	3167.97	2916.49	3172.59
b0974	hyaC	295.488	0.169331	0.313495	0.54014	0.589101	0.771502	396.063	206.974	231.757	328.932	280.544	328.658
b0975	hyaD	384.263	0.116319	0.27941	0.416304	0.677188	0.833008	454.05	364.157	288.643	338.513	364.317	495.899
b0976	hyaE	170.041	0.00300209	0.356436	0.00842251	0.99328	0.997041	257.113	134.728	117.985	157.547	183.133	169.737
b0977	hyaF	421.657	0.289924	0.331764	0.873886	0.38218	0.611547	564.554	295.817	278.108	488.608	462.702	440.152
b0978	appC	599.028	1.02242	0.295121	3.46442	0.00053137	0.0045728	527.354	315.342	343.422	636.575	930.275	841.199
b0979	appB	242.337	0.833584	0.288188	2.8925	0.00382183	0.0225685	224.29	151.325	147.482	241.643	338.99	350.291
b0980	appA	417.381	0.503008	0.286227	1.75738	0.0788538	0.221986	416.851	301.674	318.139	387.48	440.298	639.843
b0981	etk	649.815	0.0949993	0.262753	0.361554	0.717685	0.858441	597.376	628.732	659.454	699.381	480.236	833.71
b0982	etp	17.4796	-0.229833	0.557822	-0.412019	0.680325	0.834165	15.3173	9.76292	31.6032	15.9676	15.5858	16.6409
b0983	gfcE	41.185	-0.294284	0.340965	-0.863091	0.388087	0.617962	53.6107	34.1702	48.4583	40.4512	32.1456	38.2741
b0984	gfcD	69.8331	-0.742306	0.297168	-2.49794	0.0124918	0.0569907	70.0222	86.89	105.344	55.3543	44.8091	56.5791
b0985	gfcC	7.30015	-0.400571	0.910971	-0.439719	0.660141	0.824058	10.941	11.7155	2.10688	9.58056	7.79288	1.66409
b0986	gfcB	6.02057	0.363087	0.948151	0.382942	0.701763	0.849661	6.56458	4.88146	4.21376	14.9031	3.89644	1.66409
b0987	gfcA	27.2689	-0.137092	0.402536	-0.340572	0.733426	0.867652	28.4465	32.2176	25.2826	21.2901	21.4304	34.9459
b0988	insB4	208.282	-1.16321	0.251478	-4.62548	3.73729e-06	5.9712e-05	222.102	328.034	313.925	122.418	121.764	141.448
b0989	cspH	1.96832	0.403876	1.73856	0.232304	0.816302	NA	1.0941	1.95258	2.10688	0	0	6.65637
b0990	cspG	76.4553	-0.780144	0.371193	-2.10172	0.0355778	0.125321	70.0222	94.7003	125.359	38.3222	72.0842	58.2432
b0991	ymcE	0	NA	NA	NA	NA	NA	0	0	0	0	0	0
b0992	yccM	373.285	4.19922	0.627774	6.68906	2.24613e-11	1.17409e-09	31.7288	31.2414	52.672	522.673	1390.06	211.34
b0993	torS	180.406	-0.374583	0.274236	-1.36591	0.171966	0.375505	150.985	215.761	244.398	157.547	137.35	176.394
b0994	torT	162.202	-0.656964	0.233725	-2.81085	0.00494113	0.0273832	166.303	224.547	204.367	138.386	113.971	125.639
b0995	torR	128.232	-0.51978	0.26236	-1.98117	0.0475722	0.155537	158.644	143.515	151.695	94.741	87.6699	133.127
b0996	torC	23.4744	0.0440224	0.544041	0.0809175	0.935508	0.96747	17.5055	37.0991	14.7482	13.8386	30.1974	27.4575
b0997	torA	90.221	-0.28157	0.286231	-0.983719	0.325254	0.560262	99.5627	117.155	80.0615	75.5799	97.411	71.556
b0998	torD	2340.66	-0.240645	0.209366	-1.1494	0.250392	0.48058	2748.37	2497.36	2360.76	2330.2	1725.15	2382.15
b0999	cbpM	3910.34	-0.466466	0.201552	-2.31437	0.0206475	0.083822	4341.37	4986.9	4283.29	3185	2812.26	3853.21
b1000	cbpA	50991.7	-0.361281	0.197633	-1.82804	0.0675428	0.199704	64200.5	54916.4	52913.3	45766.3	37917.2	50236.4
b1001	yccE	29.7684	0.689042	0.38569	1.78652	0.0740152	0.212174	24.0701	27.3362	16.855	34.0642	43.835	32.4498
b1002	agp	13561.8	-0.449017	0.18073	-2.48446	0.0129747	0.0584413	17206.8	14679.5	15080	12534.6	9982.68	11887.4
b1003	yccJ	2185.52	1.1058	0.242235	4.56499	4.99517e-06	7.58049e-05	1064.56	1341.43	1753.98	2868.84	3020.72	3063.59
b1004	wrbA	34039.1	1.14928	0.159874	7.18865	6.54342e-13	4.13505e-11	22351.3	20300	20814.9	46972.4	42357.2	51438.7
b1006	rutG	130.444	-0.588433	0.231544	-2.54134	0.0110428	0.0519503	167.397	155.23	147.482	92.612	121.764	98.1814
b1007	rutF	18.9822	-0.0636973	0.435734	-0.146184	0.883776	0.941889	17.5055	17.5733	23.1757	20.2256	14.6117	20.8012
b1008	rutE	12.5636	-0.601551	0.518733	-1.15965	0.246189	0.476619	13.1292	16.597	15.8016	9.58056	7.79288	12.4807
b1009	rutD	18.0586	-1.57088	0.655413	-2.39677	0.0165402	0.0698913	16.4114	31.2414	33.7101	2.12901	10.7152	14.1448
b1010	rutC	8.54817	-0.176756	0.780672	-0.226415	0.820879	0.915727	3.28229	17.5733	6.32064	7.45154	5.84466	10.8166
b1011	rutB	13.9375	-0.556847	0.683811	-0.81433	0.415456	0.64098	8.75277	28.3125	12.6413	14.9031	4.87055	14.1448
b1012	rutA	18.5475	-1.68941	0.47254	-3.57517	0.000350003	0.00324097	26.2583	29.2888	29.4963	9.58056	5.84466	10.8166
b1013	rutR	180.191	-0.740286	0.279682	-2.64688	0.00812382	0.0408022	159.738	247.978	268.627	128.805	129.557	146.44
b1014	putA	10132.1	-0.742084	0.699592	-1.06074	0.288809	0.521902	20711.2	9444.65	7890.27	6247.59	1569.29	14929.4
b1015	putP	1403.53	-1.57978	0.567966	-2.78147	0.00541129	0.029487	2703.51	2011.16	1595.96	602.51	219.175	1288.84
b1018	efeO	48.3655	-0.335798	0.393682	-0.852968	0.393677	0.621986	67.834	60.5301	33.7101	42.5802	33.1198	52.4189
b1019	efeB	153.09	-1.87307	0.34144	-5.48578	4.11638e-08	1.11011e-06	208.972	262.623	250.719	50.0318	49.6796	96.5173
b1020	phoH	2400.76	-1.04138	0.811487	-1.2833	0.199387	0.418337	3422.33	3530.27	2742.1	1111.34	136.375	3462.14
b1021	pgaD	25.6414	-0.39803	0.571317	-0.696689	0.485998	0.696638	16.4114	23.431	47.4048	27.6772	27.2751	11.6486
b1022	pgaC	31.2808	-0.148597	0.417591	-0.355844	0.721957	0.860092	44.8579	21.4784	32.6566	26.6127	26.301	35.778
b1023	pgaB	81.7058	0.609863	0.484041	1.25994	0.207691	0.429587	95.1864	69.3167	29.4963	98.9991	131.505	65.7316
b1024	pgaA	426.776	0.11698	0.26623	0.439395	0.660376	0.824058	532.825	340.726	355.009	436.448	504.589	391.062
b1025	dgcT	233.434	1.13283	0.187552	6.04007	1.5405e-09	6.03933e-08	133.48	153.278	151.695	316.158	333.146	312.849
b1026	insF4	1.96279	-2.25926	1.71598	-1.3166	0.187974	NA	6.56458	0.976292	2.10688	2.12901	0	0
b1027	insE4	0.162715	-1.08951	4.08047	-0.267006	0.789465	NA	0	0.976292	0	0	0	0
b1028	ymdE	1.34063	-2.79577	2.10574	-1.32769	0.184281	NA	2.18819	4.88146	0	0	0.97411	0
b1029	ycdU	5.60727	-1.05658	1.02389	-1.03193	0.302105	0.538739	4.37638	9.76292	8.42752	4.25802	6.81877	0
b1032	serX	5.86897	-0.84947	1.43704	-0.591124	0.554437	0.748908	0	5.85775	16.855	0	5.84466	6.65637
b1033	ghrA	1240.59	-0.334113	0.154704	-2.1597	0.030796	0.112682	1319.48	1451.75	1378.95	1186.92	1070.55	1035.9
b1034	ycdX	630.94	-0.257055	0.234546	-1.09597	0.273092	0.504341	595.188	762.484	702.645	626.994	644.861	453.465
b1035	ycdY	218.931	-0.0237863	0.305916	-0.0777542	0.938024	0.968445	161.926	260.67	239.131	226.74	262.036	163.081
b1036	ycdZ	212.134	-0.702394	0.30904	-2.27283	0.0230365	0.0907511	210.066	269.457	308.658	134.128	218.201	132.295
b1037	csgG	46.6606	0.0780908	0.305222	0.255849	0.798067	0.902522	42.6697	44.9094	48.4583	56.4188	40.9126	46.5946
b1038	csgF	1.72129	4.17245	1.74061	2.39712	0.0165244	NA	0	0	0	2.12901	4.87055	3.32818
b1039	csgE	0.507053	0.795434	3.226	0.24657	0.805241	NA	1.0941	0	0	0	1.94822	0
b1040	csgD	10.1898	1.17197	0.64835	1.80762	0.0706663	0.205778	6.56458	5.85775	6.32064	21.2901	7.79288	13.3127
b1041	csgB	10.3429	0.150692	0.719218	0.209522	0.834041	0.921609	6.56458	16.597	6.32064	7.45154	6.81877	18.305
b1042	csgA	114.218	0.263553	0.320473	0.822387	0.410856	0.638607	99.5627	99.5818	112.718	109.644	91.5664	172.234
b1043	csgC	2.73881	3.78285	1.58305	2.3896	0.0168668	NA	0	0.976292	0	8.51605	1.94822	4.99228
b1044	ymdA	4.64206	0.28153	0.841995	0.334361	0.738107	0.871728	6.56458	3.90517	2.10688	6.38704	3.89644	4.99228
b1045	ymdB	1644.34	0.352403	0.283635	1.24245	0.21407	0.438072	1773.53	1313.11	1247.27	1896.95	1352.07	2283.13
b1046	clsC	1479.22	0.351457	0.307546	1.14278	0.253129	0.483916	1691.47	1083.68	1125.07	1680.86	1210.82	2083.44
b1047	opgC	36.0802	-0.229094	0.339191	-0.675413	0.499413	0.707359	35.0111	43.9332	37.9238	34.0642	27.2751	38.2741
b1048	opgG	2776	-0.173435	0.145914	-1.18861	0.234593	0.461984	3158.66	2757.05	2912.76	2505.85	2652.5	2669.2
b1049	opgH	1620.83	-0.142234	0.139658	-1.01844	0.308467	0.544415	1785.56	1661.65	1654.95	1494.57	1601.44	1526.8
b1050	yceK	4410.37	0.884515	0.447367	1.97716	0.0480241	0.156531	4024.09	2782.43	2491.39	4952.08	2865.83	9346.37
b1051	msyB	5465.02	0.381129	0.39679	0.96053	0.336788	0.571986	5853.41	4260.54	4128.43	5378.95	3536.99	9631.76
b1053	mdtG	714.194	0.328607	0.201274	1.63264	0.102545	0.26555	619.258	602.372	678.416	784.541	677.007	923.571
b1054	lpxL	1004.69	-0.123987	0.159455	-0.777566	0.436825	0.659357	1085.34	994.842	1062.92	1027.25	979.955	877.809
b1055	trhO	64.7305	-0.105744	0.421881	-0.250648	0.802086	0.905126	59.0812	80.056	62.153	77.7089	31.1715	78.2123
b1056	yceI	103.281	-0.251029	0.316873	-0.792208	0.428239	0.652867	89.7159	110.321	136.947	92.612	71.1101	118.983
b1057	yceJ	17.3981	1.05241	0.681652	1.54391	0.12261	0.300077	3.28229	11.7155	18.9619	24.4836	12.6634	33.2818
b1058	yceO	2.50512	1.9257	1.33566	1.44176	0.149369	NA	0	0.976292	2.10688	6.38704	3.89644	1.66409
b1059	solA	460.421	0.306765	0.224899	1.36401	0.172563	0.376503	366.522	411.995	456.14	491.802	605.897	430.168
b1060	bssS	20702.1	0.609411	0.459262	1.32694	0.184529	0.395394	23944.3	13683.7	11553.1	19798.7	14506.5	40726.2
b1061	dinI	164.354	0.154264	0.314524	0.490467	0.623804	0.798416	107.221	159.136	200.154	164.998	206.511	148.104
b1062	pyrC	172.925	0.020959	0.401796	0.0521632	0.958399	0.979686	153.173	168.899	192.78	134.128	279.57	108.998
b1063	yceB	624.628	0.749262	0.210169	3.56505	0.000363793	0.00333398	397.157	485.217	515.132	801.573	868.906	679.782
b1064	grxB	23303.4	0.34737	0.287017	1.21028	0.226173	0.453417	24301	18291.8	18941.9	27377	18161.3	32747.7
b1065	mdtH	56.3977	0.0843691	0.313608	0.269027	0.787909	0.897741	56.893	48.8146	58.9927	45.7738	55.5243	72.388
b1066	rimJ	837.243	0.124152	0.198573	0.625217	0.531828	0.731382	954.052	729.29	720.553	914.411	840.657	864.496
b1067	yceH	1183.48	0.0194311	0.149283	0.130162	0.896438	0.947682	1082.06	1195.96	1248.33	1198.63	1189.39	1186.5
b1068	yceM	1505.17	-0.0666795	0.150079	-0.444296	0.656829	0.822055	1617.07	1570.85	1431.63	1509.47	1510.85	1391.18
b1069	murJ	125.581	-0.205076	0.267142	-0.767668	0.442685	0.661439	113.786	164.993	124.306	134.128	102.282	113.99
b1070	flgN	49.7273	-0.372364	0.32346	-1.15119	0.249654	0.480033	66.7399	43.9332	57.9392	43.6448	37.0162	49.0907
b1071	flgM	115.809	-0.0325553	0.260868	-0.124796	0.900685	0.949814	124.727	123.989	102.184	139.45	107.152	97.3494
b1072	flgA	84.6136	0.0886491	0.36357	0.243829	0.807363	0.907798	80.9631	74.1982	90.5959	92.612	116.893	52.4189
b1073	flgB	50.2612	2.15728	0.986044	2.18781	0.0286833	0.106624	10.941	27.3362	16.855	63.8704	179.236	3.32818
b1074	flgC	22.727	2.66327	1.86957	1.42453	0.154292	0.347855	0	4.88146	13.6947	35.1287	81.8253	0.832046
b1075	flgD	84.9052	1.52109	0.796459	1.90982	0.0561567	0.174958	32.8229	57.6012	41.0842	118.16	246.45	13.3127
b1076	flgE	171.874	1.72089	0.663934	2.59195	0.00954335	0.0463378	47.0461	106.416	86.3821	259.739	473.418	58.2432
b1077	flgF	49.9365	0.964054	0.640104	1.50609	0.132044	0.314794	19.6937	32.2176	49.5117	52.1608	122.738	23.2973
b1078	flgG	100.942	1.49866	0.586864	2.55367	0.0106594	0.0504833	27.3524	65.4116	65.3133	174.579	223.071	49.9228
b1079	flgH	20.5373	1.09784	0.727375	1.50932	0.131217	0.313528	10.941	17.5733	10.5344	39.3867	38.9644	5.82432
b1080	flgI	37.3052	1.12962	0.608545	1.85626	0.063417	0.190701	13.1292	41.0043	15.8016	50.0318	78.9029	24.9614
b1081	flgJ	22.0383	0.138164	0.557803	0.247693	0.804372	0.906015	24.0701	17.5733	21.0688	34.0642	26.301	9.15251
b1082	flgK	118.967	0.492055	0.325607	1.51119	0.130739	0.31274	92.9982	106.416	96.9165	190.547	95.4628	131.463
b1083	flgL	142.686	0.440884	0.229054	1.9248	0.0542539	0.170197	138.95	104.463	120.092	166.063	150.987	175.562
b1084	rne	5140.92	0.120539	0.198464	0.60736	0.543612	0.739969	5827.16	4405.03	4546.65	5584.4	5626.46	4855.82
b1085	yceQ	902.243	-0.0552048	0.212984	-0.259197	0.795483	0.901278	1018.6	876.71	863.821	836.702	761.754	1055.87
b1086	rluC	201.574	0.27425	0.204548	1.34076	0.179998	0.388833	173.961	166.946	206.474	219.288	234.761	208.012
b1087	yceF	354.345	0.0225126	0.211038	0.106675	0.915047	0.956377	409.192	346.584	299.177	331.061	384.774	355.284
b1088	yceD	1466.75	-0.249927	0.249798	-1.00052	0.31706	0.551534	1347.93	1745.61	1686.56	1231.63	1687.16	1101.63
b1089	rpmF	2535.77	-0.0351297	0.387309	-0.090702	0.927729	0.964092	1527.36	3118.28	3053.92	2496.27	3359.71	1659.1
b1090	plsX	886.586	0.2645	0.220849	1.19765	0.231053	0.457712	951.864	745.887	719.5	856.927	925.405	1119.93
b1091	fabH	1372.34	0.173776	0.161501	1.07601	0.281924	0.514473	1431.08	1213.53	1225.15	1458.37	1394.93	1511
b1092	fabD	2762.72	0.405505	0.162307	2.49838	0.0124762	0.0569907	2589.73	2241.57	2299.66	3172.23	3374.32	2898.85
b1093	fabG	7401.23	0.171677	0.142074	1.20837	0.226907	0.453813	7457.36	6960.96	6466.02	7666.57	7971.15	7885.3
b1094	acpP	8847.56	-0.263711	0.160171	-1.64644	0.099673	0.26129	8652.11	10216.9	10093	7698.51	7846.46	8578.39
b1095	fabF	4032.62	0.239617	0.158078	1.51581	0.129566	0.310637	3644.43	3896.38	3554.31	4269.73	4806.26	4024.61
b1096	pabC	295.295	-0.34636	0.21814	-1.58779	0.112334	0.282603	320.57	351.465	320.246	229.933	236.709	312.849
b1097	mltG	134.719	-0.475201	0.25302	-1.87812	0.0603646	0.184527	145.515	165.97	159.069	104.322	94.4887	138.952
b1098	tmk	353.862	-0.555987	0.182203	-3.05147	0.00227725	0.0149024	412.474	468.62	382.399	291.675	277.621	290.384
b1099	holB	336.647	-0.176729	0.18096	-0.976623	0.328756	0.563661	321.664	391.493	358.17	327.868	313.664	307.025
b1100	ycfH	2147.79	0.144401	0.326381	0.44243	0.658178	0.822565	2436.55	1810.05	1875.12	2014.05	1551.76	3199.22
b1101	ptsG	2930.17	0.79793	0.450887	1.76969	0.0767788	0.218175	1912.48	2367.51	2139.54	2799.65	6468.09	1893.74
b1102	fhuE	133.194	-0.219769	0.269541	-0.815343	0.414876	0.640568	144.421	138.633	147.482	106.451	103.256	158.921
b1103	hinT	2310.14	-0.0393654	0.255376	-0.154147	0.877494	0.938921	2876.38	2098.05	2051.05	2238.66	1851.78	2744.92
b1104	ycfL	1379.54	-0.0724853	0.202212	-0.358463	0.719997	0.859834	1570.03	1313.11	1359.99	1332.76	1150.42	1550.93
b1105	lpoB	2274.4	0.147845	0.205017	0.721138	0.470825	0.685513	2552.53	1946.73	1975.2	2300.4	2201.49	2670.04
b1106	thiK	203.906	0.221119	0.195306	1.13217	0.257565	0.488311	206.784	170.851	187.512	212.901	229.89	215.5
b1107	nagZ	1011.1	0.234034	0.151712	1.54263	0.122921	0.300379	863.242	963.6	960.738	1066.64	1146.53	1065.85
b1108	ycfP	2421.04	0.233996	0.15458	1.51375	0.130088	0.311359	2191.47	2274.76	2209.06	2787.94	2350.53	2712.47
b1109	ndh	346.087	0.561605	0.2805	2.00216	0.0452678	0.150841	266.959	286.054	285.482	362.997	557.191	317.842
b1110	ycfJ	45.3042	0.223879	0.407306	0.549658	0.582554	0.769277	49.2343	38.0754	37.9238	71.3219	31.1715	44.0984
b1111	comR	431.62	0.0703936	0.256615	0.274316	0.783842	0.896747	415.757	470.573	377.132	455.609	333.146	537.502
b1112	bhsA	131.649	-0.00803503	0.566085	-0.014194	0.988675	0.99502	177.244	105.44	113.772	89.4185	53.5761	250.446
b1113	ldtC	165.647	0.160077	0.346312	0.462235	0.643913	0.81303	226.478	133.752	109.558	147.966	171.443	204.683
b1114	mfd	2525.09	-0.8371	0.174819	-4.78837	1.68141e-06	2.9787e-05	3373.1	3423.86	2915.92	1812.85	1988.16	1636.63
b1115	ycfT	26.6176	-0.115028	0.441377	-0.260612	0.794392	0.900636	25.1642	27.3362	30.5498	17.0321	37.9903	21.6332
b1116	lolC	426.233	-0.183124	0.20204	-0.906376	0.364737	0.596714	447.485	457.881	454.033	387.48	468.547	341.971
b1117	lolD	196.802	-0.368941	0.222751	-1.65629	0.0976622	0.257794	193.655	235.286	235.971	188.418	180.21	147.272
b1118	lolE	764.146	-0.196385	0.180205	-1.08979	0.275806	0.507502	850.113	789.82	809.042	629.123	701.359	805.421
b1119	nagK	1223.88	0.0263206	0.165882	0.158671	0.873928	0.936941	1307.44	1187.17	1144.04	1210.34	1145.55	1348.75
b1120	cobB	296.654	-0.24116	0.201206	-1.19857	0.230695	0.4575	289.935	358.299	316.032	241.643	290.285	283.728
b1121	ycfZ	7.41676	-0.24769	0.773684	-0.320144	0.748859	0.879276	8.75277	2.92888	12.6413	5.32253	4.87055	9.98455
b1122	ymfA	3.15411	-1.27978	1.17545	-1.08876	0.276259	NA	2.18819	3.90517	7.37408	2.12901	0	3.32818
b1123	potD	1015.97	0.125602	0.415987	0.301937	0.7627	0.885984	595.188	1118.83	1200.92	1145.41	1439.74	595.745
b1124	potC	84.7256	-0.944158	0.278979	-3.38434	0.000713502	0.00584326	126.915	94.7003	112.718	58.5478	67.2136	48.2587
b1125	potB	82.3535	-0.678187	0.264836	-2.56078	0.0104438	0.0496845	97.3746	118.131	88.489	67.0639	56.4984	66.5637
b1126	potA	256.077	-0.510687	0.207271	-2.46386	0.0137451	0.0608116	324.947	290.935	287.589	183.095	209.434	240.461
b1127	pepT	3313.11	0.447892	0.226906	1.97391	0.0483919	0.156958	3351.22	2593.03	2465.05	3182.87	4063.01	4223.47
b1128	roxA	2034.21	-0.13675	0.176645	-0.77415	0.438842	0.660103	2179.44	2077.55	2135.32	1840.53	1741.71	2230.72
b1129	phoQ	2659.07	1.90798	0.178305	10.7006	1.01075e-26	2.51735e-24	1250.55	1100.28	1006.04	4431.54	4355.25	3810.77
b1130	phoP	7622	2.34524	0.168679	13.9036	6.02485e-44	5.10184e-41	2675.07	2573.51	2271.22	13918.4	12623.5	11670.3
b1131	purB	332.269	-0.044566	0.208705	-0.213536	0.830909	0.920296	338.076	336.821	337.101	306.578	389.644	285.392
b1132	hflD	233.682	-0.671003	0.190872	-3.51546	0.000439001	0.00393799	256.018	300.698	304.444	179.902	176.314	184.714
b1133	mnmA	504.584	-0.736624	0.185185	-3.97777	6.95657e-05	0.000775108	622.541	629.708	639.438	366.19	433.479	336.147
b1134	nudJ	130.235	-0.868294	0.240922	-3.60405	0.000313296	0.00296092	176.149	187.448	141.161	98.9991	82.7994	94.8532
b1135	rluE	197.512	-0.480204	0.233702	-2.05477	0.0399012	0.137336	242.889	259.694	187.512	178.837	148.065	168.073
b1136	icd	38072.1	-1.16123	0.248065	-4.68113	2.85302e-06	4.73714e-05	51735.4	54357	51758.7	30784.5	18805.2	20991.7
b1137	ymfD	44.5616	-0.241418	0.438947	-0.549994	0.582324	0.769277	24.0701	61.5064	58.9927	44.7093	44.8091	33.2818
b1138	ymfE	210.672	-0.327951	0.307843	-1.06532	0.286732	0.519103	154.268	265.551	283.375	193.74	206.511	160.585
b1139	lit	292.104	-0.541119	0.196428	-2.75479	0.00587291	0.0311994	301.971	353.418	383.452	223.546	246.45	243.789
b1140	intE	73.4991	1.38326	0.280844	4.92535	8.42092e-07	1.63551e-05	41.5757	47.8383	32.6566	110.709	98.3852	109.83
b1141	xisE	2.31847	1.14998	1.50618	0.763508	0.44516	NA	4.37638	0	0	4.25802	1.94822	3.32818
b1142	ymfH	59.7181	0.260629	0.333266	0.782046	0.434188	0.657023	43.7638	48.8146	70.5805	65.9994	52.602	76.5482
b1143	ymfI	195.042	0.643944	0.306011	2.10432	0.035351	0.124626	133.48	133.752	189.619	174.579	300.026	238.797
b1144	ymfJ	108.576	2.97737	0.434964	6.84508	7.64328e-12	4.25811e-10	39.3875	19.5258	14.7482	200.127	136.375	241.293
b1145	ymfK	339.122	-0.00342662	0.202623	-0.0169113	0.986507	0.994166	303.065	356.347	359.223	349.158	294.181	372.757
b1146	ymfT	104.797	0.676912	0.308873	2.19156	0.0284114	0.106079	74.3985	62.4827	105.344	128.805	107.152	150.6
b1147	ymfL	38.4041	1.14058	0.40315	2.82917	0.00466692	0.0261027	19.6937	35.1465	16.855	45.7738	61.369	51.5869
b1148	ymfM	9.17454	2.09529	0.802093	2.61228	0.00899399	0.0443312	5.47048	1.95258	3.16032	11.7096	7.79288	24.9614
b1149	ymfN	0	NA	NA	NA	NA	NA	0	0	0	0	0	0
b1150	ymfR	0.788081	3.04361	2.80738	1.08415	0.2783	NA	0	0	0	0	3.89644	0.832046
b1151	beeE	3.28713	1.12791	1.22593	0.920044	0.35755	NA	2.18819	1.95258	2.10688	0	6.81877	6.65637
b1152	jayE	10.177	0.0650971	0.722324	0.0901218	0.92819	0.964092	4.37638	13.6681	11.5878	18.0966	5.84466	7.48841
b1153	ymfQ	4.62354	1.27639	1.1093	1.15062	0.249888	0.480139	0	3.90517	4.21376	2.12901	5.84466	11.6486
b1154	ycfK	3.99514	-3.52851	1.52637	-2.3117	0.0207944	0.0841717	2.18819	15.6207	4.21376	0	1.94822	0
b1155	tfaP	1.21981	0.320676	1.82038	0.176159	0.860169	NA	2.18819	0	1.05344	2.12901	1.94822	0
b1156	tfaE	2.09801	-0.591518	1.58774	-0.372554	0.70948	NA	4.37638	0	3.16032	2.12901	2.92233	0
b1157	stfE	1.35789	-1.86921	2.08513	-0.896445	0.370015	NA	4.37638	0	2.10688	0	0	1.66409
b1158	pinE	1.37887	-3.97804	2.41211	-1.6492	0.0991075	NA	0	1.95258	6.32064	0	0	0
b1159	mcrA	26.187	0.896828	0.427601	2.09735	0.0359629	0.126258	17.5055	20.5021	16.855	25.5481	46.7573	29.9537
b1160	iraM	48.1212	7.10215	1.27734	5.5601	2.69615e-08	7.41266e-07	0	0	2.10688	59.6123	198.719	28.2896
b1161	ycgX	0.440064	0.614306	3.32313	0.184858	0.853341	NA	0	0.976292	0	0	0	1.66409
b1162	bluR	350.169	-0.190671	0.194318	-0.98123	0.326479	0.561232	327.135	395.398	397.147	344.9	296.13	340.307
b1163	bluF	109.195	-0.437903	0.227518	-1.9247	0.054267	0.170197	117.068	136.681	123.253	84.096	98.3852	95.6853
b1164	ycgZ	22.0235	-1.94184	0.463937	-4.18556	2.84464e-05	0.000358459	37.1993	35.1465	32.6566	5.32253	12.6634	9.15251
b1165	ymgA	13.6567	0.0176293	0.700193	0.0251778	0.979913	0.991017	8.75277	21.4784	10.5344	13.8386	4.87055	22.4652
b1166	ariR	94.7977	1.5726	0.763661	2.05929	0.0394669	0.136188	52.5166	51.7435	38.9773	85.1605	23.3786	317.01
b1167	ymgC	35.6993	-0.30914	0.672038	-0.460004	0.645513	0.81303	54.7048	41.0043	23.1757	10.6451	21.4304	63.2355
b1168	pdeG	22.1262	-0.177522	0.478641	-0.370888	0.710721	0.85493	24.0701	21.4784	25.2826	12.7741	17.534	31.6177
b1171	ymgD	40.5229	0.6677	0.448958	1.48722	0.136956	0.322509	24.0701	21.4784	48.4583	57.4833	35.068	56.5791
b1172	ymgG	2.01835	2.20404	2.04104	1.07986	0.280205	NA	2.18819	0	0	2.12901	7.79288	0
b1174	minE	227.695	-0.243737	0.314166	-0.775823	0.437854	0.659825	237.419	223.571	279.162	252.288	240.605	133.127
b1175	minD	3094.14	0.0461142	0.23518	0.19608	0.844547	0.925646	3026.27	3259.84	2847.45	3254.2	3782.47	2394.63
b1176	minC	1611.58	0.0443164	0.157827	0.280791	0.778871	0.895478	1606.13	1521.06	1632.83	1774.53	1647.22	1487.7
b1177	ycgJ	266.74	0.324016	0.486768	0.665648	0.505636	0.711098	129.103	322.176	259.146	274.643	459.78	155.593
b1178	pliG	397.057	0.0389481	0.176169	0.221083	0.825028	0.918081	402.627	402.232	369.758	437.512	403.282	366.932
b1179	ycgL	307.403	0.337541	0.170855	1.9756	0.0482003	0.156864	253.83	273.362	287.589	335.319	350.68	343.635
b1180	ycgM	371.306	0.558738	0.194421	2.87386	0.00405492	0.0233449	287.747	298.745	313.925	507.769	422.764	396.886
b1181	ycgN	295.331	0.27929	0.331903	0.841481	0.400079	0.629585	364.334	221.618	214.902	338.513	235.735	396.886
b1182	hlyE	262.403	2.48209	0.267423	9.2815	1.67105e-20	3.21601e-18	67.834	74.1982	96.9165	424.738	533.813	376.917
b1183	umuD	42.7129	1.31608	0.347812	3.78389	0.000154395	0.00160616	26.2583	29.2888	17.9085	53.2253	61.369	68.2278
b1184	umuC	74.8612	0.643794	0.376441	1.71021	0.0872264	0.237962	42.6697	73.2219	58.9927	127.741	69.1618	77.3803
b1185	dsbB	129.003	-0.333722	0.227775	-1.46514	0.142882	0.330401	141.138	135.705	154.856	101.128	130.531	110.662
b1186	nhaB	497.652	-0.417274	0.227806	-1.8317	0.0669955	0.198765	559.083	564.297	583.606	413.028	523.097	342.803
b1187	fadR	584.476	-0.281486	0.198652	-1.41698	0.156488	0.350937	549.236	673.642	700.538	551.414	561.088	470.938
b1188	ycgB	13654.8	0.301468	0.321204	0.938558	0.347958	0.582313	14496.8	11115.1	11088.5	15110.7	9729.41	20388.5
b1189	dadA	12214	-2.51589	0.509911	-4.93398	8.0572e-07	1.57936e-05	20283.4	22008.6	20085.9	4028.09	1158.22	5719.48
b1190	dadX	5867.22	-2.25834	0.529909	-4.26175	2.02836e-05	0.000267542	9343.58	10262.8	9511.51	1917.18	642.913	3525.38
b1191	cvrA	422.761	0.266214	0.218108	1.22056	0.222253	0.448984	314.006	444.213	392.933	457.738	501.667	426.008
b1192	ldcA	475.13	-0.0625972	0.180232	-0.347316	0.728354	0.863965	463.897	545.747	446.659	440.706	469.521	484.251
b1193	emtA	87.3012	0.16713	0.341894	0.488836	0.624958	0.798635	92.9982	60.5301	93.7562	72.3864	81.8253	122.311
b1194	ycgR	15.1784	0.689445	0.612705	1.12525	0.260484	0.490907	10.941	15.6207	8.42752	12.7741	11.6893	31.6177
b1195	ymgE	172.194	-0.105702	0.325242	-0.324994	0.745186	0.876665	194.749	162.065	179.085	167.127	107.152	222.988
b1196	ycgY	23.2621	1.62187	0.570922	2.8408	0.00450007	0.0253032	13.1292	10.7392	10.5344	26.6127	19.4822	59.0753
b1197	treA	3028.29	0.524499	0.297054	1.76567	0.0774513	0.219424	3479.23	1987.73	1984.68	3966.35	3141.51	3610.25
b1198	dhaM	1042.48	0.388783	0.296458	1.31143	0.189714	0.403642	774.62	981.174	952.31	1257.18	1499.16	790.444
b1199	dhaL	649.531	0.547027	0.26309	2.07924	0.0375953	0.131011	526.26	531.103	525.667	922.927	850.398	540.83
b1200	dhaK	1244.62	0.499111	0.254387	1.96202	0.0497607	0.16034	970.463	1058.3	1065.03	1691.5	1642.35	1040.06
b1201	dhaR	244.266	-0.372337	0.271259	-1.37262	0.169869	0.372078	242.889	297.769	286.536	205.45	161.702	271.247
b1202	ycgV	282.12	0.0327416	0.198739	0.164747	0.869143	0.934947	309.629	262.623	264.414	285.288	313.664	257.102
b1203	ychF	504.65	-0.386512	0.260796	-1.48204	0.138328	0.32376	508.755	590.657	616.263	333.19	557.191	421.847
b1204	pth	119.006	0.605846	0.238066	2.54487	0.0109319	0.051543	99.5627	104.463	79.008	152.224	131.505	147.272
b1205	ychH	4918.52	-0.738463	0.281926	-2.61935	0.00880977	0.0436241	6146.63	6393.74	5911.91	3280.81	2721.66	5056.34
b1206	dauA	192.873	-0.537741	0.304072	-1.76846	0.0769832	0.218463	210.066	232.358	243.345	138.386	115.919	217.164
b1207	prs	1768.25	0.0230974	0.259316	0.0890703	0.929026	0.964092	1792.13	1694.84	1775.05	1668.08	2333.97	1345.42
b1208	ispE	1062.85	0.0284196	0.197367	0.143994	0.885505	0.941889	1063.46	1104.19	989.18	1019.8	1264.4	936.052
b1209	lolB	713.635	0.132978	0.191796	0.693332	0.488101	0.698591	794.314	643.377	604.675	757.928	773.444	708.071
b1210	hemA	946.771	-0.255208	0.214855	-1.18782	0.234906	0.462289	818.384	1174.48	1097.68	844.153	920.534	825.39
b1211	prfA	323.407	0.2498	0.225788	1.10634	0.268578	0.500289	250.548	299.722	336.047	318.287	407.178	328.658
b1212	prmC	83.056	-0.0268553	0.410249	-0.0654611	0.947807	0.974269	55.7989	85.9137	109.558	73.4509	117.867	55.7471
b1213	ychQ	162.528	-0.829874	0.344533	-2.40869	0.0160097	0.0681256	143.327	181.59	299.177	104.322	134.427	112.326
b1214	ychA	593.113	-0.0849914	0.179671	-0.473039	0.636186	0.806749	607.223	583.823	640.492	560.995	647.783	518.365
b1215	kdsA	2283.1	0.246788	0.242664	1.017	0.309154	0.545173	1763.68	2221.06	2279.64	2566.52	2934.02	1933.67
b1216	chaA	202.578	0.871913	0.300274	2.90372	0.00368756	0.0219594	142.232	126.918	160.123	282.094	324.379	179.722
b1217	chaB	479.441	0.0701342	0.321017	0.218475	0.827059	0.918711	603.941	354.394	445.605	442.835	380.877	648.996
b1218	chaC	565.638	0.15235	0.290349	0.524715	0.599781	0.77876	648.799	473.502	485.636	558.866	449.065	777.963
b1219	ychN	257.264	-0.556259	0.292636	-1.90086	0.0573204	0.17788	266.959	275.314	376.078	222.482	251.32	151.432
b1220	ychO	190.113	0.0726649	0.308744	0.235357	0.813932	0.911498	121.445	195.258	239.131	184.16	214.304	186.378
b1221	narL	1938.32	0.244485	0.52461	0.466032	0.641193	0.81136	554.707	2311.86	2456.62	2188.62	2558.01	1560.09
b1222	narX	1470.68	0.136356	0.45644	0.298738	0.76514	0.88732	529.543	1791.5	1882.5	1523.31	1582.93	1514.32
b1223	narK	3317.5	0.722779	0.792512	0.91201	0.361763	0.593915	203.502	3372.11	3934.6	3143.49	5988.83	3262.45
b1224	narG	52819.3	1.79333	0.602901	2.97449	0.00293474	0.0183644	5788.86	27357.7	37813.2	76587	114197	55172.1
b1225	narH	15996.1	1.80632	1.15388	1.56543	0.117483	0.291402	531.731	8562.08	12246.2	23519.2	41350	9767.39
b1226	narJ	3635.58	1.38297	1.13939	1.21378	0.224834	0.452016	181.62	2671.14	3192.98	4566.73	9368.02	1833
b1227	narI	3879.15	1.24743	1.26334	0.987407	0.323443	0.558283	149.891	3136.83	3611.19	4595.47	10450.3	1331.27
b1228	ychS	20.3939	-0.298193	0.536145	-0.55618	0.578088	0.766079	16.4114	24.4073	26.336	24.4836	22.4045	8.32046
b1229	tpr	0	NA	NA	NA	NA	NA	0	0	0	0	0	0
b1230	tyrV	34.6054	-1.12573	0.488288	-2.30545	0.0211412	0.0852198	30.6347	47.8383	64.2599	11.7096	22.4045	30.7857
b1231	tyrT	56.3513	-0.923677	0.486406	-1.89899	0.0575664	0.17843	30.6347	80.056	110.611	41.5157	37.0162	38.2741
b1232	purU	307.532	0.318384	0.222586	1.43039	0.152606	0.345239	243.983	252.86	324.46	358.739	299.052	366.1
b1233	ychJ	259.061	-0.191563	0.215989	-0.886909	0.375128	0.606939	239.607	268.48	320.246	261.869	244.502	219.66
b1234	rssA	1114.26	0.948002	0.206675	4.58693	4.4982e-06	6.97701e-05	886.218	751.745	644.705	1325.31	1596.57	1481.04
b1235	rssB	1357.46	0.373708	0.287218	1.30113	0.193214	0.408626	1497.82	1085.64	964.951	1351.92	1279.98	1964.46
b1236	galU	1748.23	0.551594	0.176553	3.12424	0.00178265	0.0123128	1389.5	1439.05	1425.3	1988.5	2386.57	1860.45
b1237	hns	30975.8	0.522543	0.138757	3.76587	0.000165967	0.00170974	26200.3	26083.6	23996.3	35437.4	35517	38620.2
b1238	tdk	61.9729	1.4867	0.337571	4.40411	1.0622e-05	0.000151427	32.8229	29.2888	35.817	68.1284	115.919	89.861
b1241	adhE	30328.1	0.431754	0.231552	1.86461	0.0622366	0.188356	31711.3	22808.1	22951.3	32205.6	40442.1	31849.9
b1242	ychE	63.7939	-0.338261	0.286955	-1.17879	0.238481	0.466172	60.1753	74.1982	79.008	59.6123	62.3431	47.4266
b1243	oppA	44825.9	0.393358	0.327635	1.2006	0.229906	0.456417	45967.4	34626.2	35664.2	52169.3	31928.4	68599.7
b1244	oppB	2048.59	0.886257	0.173622	5.10453	3.31611e-07	7.23733e-06	1540.49	1356.07	1418.98	2832.65	2331.05	2812.32
b1245	oppC	1455.11	0.714111	0.154289	4.62839	3.68524e-06	5.91034e-05	1190.38	1040.73	1075.56	1893.76	1710.54	1819.68
b1246	oppD	2247.12	0.886579	0.140722	6.30023	2.97195e-10	1.27104e-08	1610.51	1523.02	1599.12	3080.68	2902.85	2766.55
b1247	oppF	2496.42	0.736246	0.227284	3.23932	0.00119817	0.00883803	1599.57	1801.26	2217.49	3441.55	3322.69	2595.98
b1248	yciU	186.616	0.260699	0.216378	1.20483	0.228269	0.455248	156.456	179.638	172.764	230.998	202.615	177.226
b1249	clsA	1015.38	0.0290484	0.209251	0.138821	0.889592	0.944578	1218.82	880.616	916.493	1008.09	979.955	1088.32
b1250	kch	823.721	0.575821	0.165578	3.47763	0.000505867	0.00442418	635.67	716.598	632.064	917.604	1056.91	983.478
b1251	yciI	829.368	-0.155212	0.345185	-0.449649	0.652964	0.81867	742.891	930.406	948.096	797.315	1089.06	468.442
b1252	tonB	203.672	-1.12415	0.347016	-3.23948	0.00119748	0.00883803	339.17	254.812	244.398	107.515	90.5923	185.546
b1253	yciA	37.5571	-0.0833195	0.470716	-0.177006	0.859504	0.92934	43.7638	42.9569	29.4963	17.0321	43.835	48.2587
b1254	yciB	180.282	-0.257316	0.243753	-1.05564	0.291133	0.525428	205.69	169.875	213.848	162.869	136.375	193.035
b1255	yciC	244.55	-0.251539	0.18156	-1.38543	0.165921	0.365319	283.371	254.812	259.146	237.385	216.253	216.332
b1256	ompW	5628.78	0.12067	0.452929	0.266422	0.789914	0.899142	7414.69	4199.03	4566.66	6655.29	8305.27	2631.76
b1257	yciE	81.1447	1.58061	0.363292	4.35078	1.35652e-05	0.000187696	35.0111	29.2888	57.9392	94.741	127.608	142.28
b1258	yciF	81.1731	1.46342	0.347267	4.21411	2.50763e-05	0.000318839	37.1993	41.9806	50.5651	117.096	83.7735	156.425
b1259	yciG	310.749	1.36886	0.572036	2.39295	0.0167135	0.0704079	181.62	162.065	176.978	256.546	181.185	906.098
b1260	trpA	717.329	-0.0726047	0.258659	-0.280697	0.778943	0.895478	760.397	661.926	783.76	853.734	509.46	734.697
b1261	trpB	605.593	-0.31027	0.249535	-1.24339	0.213723	0.437573	758.209	685.357	567.804	626.994	416.919	578.272
b1262	trpC	389.211	-0.528571	0.22078	-2.39411	0.0166608	0.0702609	485.779	424.687	468.781	359.803	254.243	341.971
b1263	trpD	246.79	-0.983552	0.330317	-2.9776	0.00290513	0.0182607	247.266	283.125	452.979	192.676	126.634	178.058
b1264	trpE	29.7089	-0.425073	0.454143	-0.935991	0.349278	0.58314	27.3524	35.1465	40.0307	14.9031	23.3786	37.4421
b1265	trpL	16.9529	0.621393	0.516665	1.2027	0.229092	0.45622	12.0351	20.5021	7.37408	22.3546	19.4822	19.9691
b1266	rnm	831.951	-0.298218	0.222516	-1.34021	0.180178	0.389022	1000	859.137	894.371	721.735	613.69	902.77
b1267	yciO	1078.27	0.00150643	0.205227	0.00734034	0.994143	0.997441	1206.79	1010.46	1016.57	988.926	978.007	1268.87
b1268	yciQ	117.182	0.325502	0.264709	1.22966	0.218824	0.444578	82.0572	103.487	126.413	139.45	116.893	134.791
b1269	rluB	264.646	-0.279797	0.188468	-1.48458	0.137654	0.323163	292.124	319.248	259.146	237.385	244.502	235.469
b1270	btuR	131.015	-1.00981	0.237809	-4.24629	2.1734e-05	0.000284897	150.985	173.78	200.154	94.741	85.7217	80.7085
b1271	yciK	604.697	-0.623662	0.172389	-3.61776	0.000297167	0.00284662	721.009	779.081	700.538	456.673	444.194	526.685
b1272	sohB	617.15	-0.226748	0.171771	-1.32006	0.186816	0.399282	643.329	660.95	692.11	552.479	633.172	520.861
b1273	yciN	1507.44	-0.315244	0.177426	-1.77676	0.0756069	0.215424	1425.61	1766.11	1822.45	1365.76	1332.58	1332.11
b1274	topA	3060.1	-0.397889	0.184631	-2.15505	0.0311578	0.113388	3875.29	3335.99	3227.74	2448.36	2482.03	2991.21
b1275	cysB	856.205	-0.418853	0.355556	-1.17802	0.238788	0.466557	1486.88	709.764	742.675	612.091	741.298	844.527
b1276	acnA	175677	-0.96485	0.589526	-1.63665	0.101703	0.26434	309491	192791	194696	105666	32974.6	218442
b1277	ribA	2842.01	-0.868935	0.146229	-5.94229	2.81065e-09	1.03481e-07	3779.01	3534.18	3706	2025.76	1865.42	2141.69
b1278	pgpB	562.096	-0.150626	0.189784	-0.793671	0.427387	0.652522	611.6	544.771	618.369	531.189	467.573	599.073
b1279	lapA	546.744	-0.521955	0.209928	-2.48636	0.0129058	0.058317	724.292	603.349	606.782	422.609	398.411	525.021
b1280	lapB	880.88	-0.423393	0.196655	-2.15297	0.0313208	0.113587	992.345	951.885	1083.99	734.509	649.732	872.816
b1281	pyrF	99.3165	0.246807	0.328112	0.752203	0.451929	0.668674	80.9631	100.558	90.5959	113.902	138.324	71.556
b1282	yciH	9.48056	0.35865	0.575172	0.623552	0.532922	0.732051	8.75277	7.81034	8.42752	10.6451	8.76699	12.4807
b1283	osmB	1725.04	0.770279	0.380135	2.02633	0.0427311	0.144855	1542.68	1153.98	1129.29	1703.21	1416.36	3404.73
b1284	yciT	214.573	-0.57104	0.280901	-2.03289	0.0420641	0.143167	252.736	267.504	248.612	195.869	204.563	118.151
b1285	pdeR	1048.44	0.727446	0.326818	2.22584	0.0260248	0.0996283	1099.57	663.879	605.728	1201.83	1058.86	1660.76
b1286	rnb	999.302	-0.388534	0.770325	-0.504376	0.613997	0.790652	2706.79	393.446	299.177	468.383	893.259	1234.76
b1287	yciW	1138.89	-1.23617	1.84476	-0.670099	0.502795	0.709496	4695.86	51.7435	49.5117	102.193	578.622	1355.4
b1288	fabI	6376.44	-0.114222	0.163562	-0.698344	0.484962	0.696638	6722.13	6779.37	6384.9	5475.82	6815.85	6080.59
b1289	ycjD	45.1424	-0.0627556	0.32233	-0.194694	0.845633	0.925646	55.7989	44.9094	37.9238	38.3222	44.8091	49.0907
b1290	sapF	300.712	0.38346	0.23178	1.65442	0.0980432	0.258478	307.441	255.789	220.169	295.933	343.861	381.077
b1291	sapD	826.511	0.452336	0.205733	2.19865	0.0279026	0.104844	771.338	628.732	694.217	1025.12	798.771	1040.89
b1292	sapC	164.989	0.559832	0.215574	2.59694	0.00940586	0.0458278	149.891	121.06	129.573	191.611	183.133	214.668
b1293	sapB	285.381	0.356782	0.17632	2.02349	0.0430226	0.145726	258.207	240.168	252.826	309.771	306.845	344.467
b1294	sapA	1259.83	0.241264	0.196414	1.22835	0.219317	0.444987	1315.1	1043.66	1106.11	1260.38	1287.77	1545.94
b1295	ymjA	64.2669	-0.339052	0.476843	-0.711036	0.477062	0.69103	99.5627	37.0991	79.008	57.4833	35.068	77.3803
b1296	puuP	281.838	-1.28776	0.574142	-2.24293	0.0249012	0.0965493	596.282	356.347	247.558	100.064	77.9288	312.849
b1297	puuA	2680.23	-3.11226	0.590047	-5.27459	1.33053e-07	3.18274e-06	6193.68	4996.66	3224.58	496.06	157.806	1012.6
b1298	puuD	1088.84	-3.62712	0.422486	-8.58517	9.07046e-18	1.23885e-15	1826.05	2545.19	1672.86	196.934	74.0324	217.996
b1299	puuR	497.01	-2.71791	0.458867	-5.92309	3.15944e-09	1.14334e-07	960.616	972.387	656.293	100.064	67.2136	225.484
b1300	puuC	1207.26	-1.43177	1.28279	-1.11614	0.264363	0.494356	3798.7	989.96	496.17	310.836	82.7994	1565.08
b1301	puuB	837.761	-1.0959	1.42343	-0.769897	0.441361	0.661216	2786.66	418.829	219.116	216.095	66.2395	1319.62
b1302	puuE	636.909	-0.767051	1.3821	-0.554989	0.578902	0.766705	1994.54	230.405	182.245	211.837	75.0065	1127.42
b1303	pspF	495.326	-0.0504925	0.228585	-0.220892	0.825177	0.918081	605.035	459.834	447.712	442.835	454.91	561.631
b1304	pspA	756.495	-0.016617	0.207336	-0.0801452	0.936122	0.96747	675.057	860.113	746.889	738.767	859.165	658.98
b1305	pspB	29.6149	-0.438073	0.36688	-1.19405	0.232459	0.459492	30.6347	41.0043	30.5498	26.6127	21.4304	27.4575
b1306	pspC	125.039	-0.0765374	0.335024	-0.228453	0.819294	0.91464	102.845	172.804	109.558	91.5475	123.712	149.768
b1307	pspD	38.4466	-0.700852	0.429885	-1.63032	0.103033	0.26602	47.0461	36.1228	60.0461	25.5481	19.4822	42.4343
b1308	pspE	1891.21	-0.676507	0.355933	-1.90066	0.0573467	0.17788	1642.24	2566.67	2770.55	1741.53	1736.84	889.457
b1309	ycjM	28.1769	1.22283	0.589696	2.07366	0.0381105	0.132371	28.4465	11.7155	10.5344	57.4833	40.9126	19.9691
b1310	ycjN	17.041	0.589812	0.767573	0.768412	0.442242	0.661411	8.75277	8.78663	23.1757	23.4191	33.1198	4.99228
b1311	ycjO	9.10591	0.391586	0.688492	0.568758	0.56952	0.760772	3.28229	11.7155	8.42752	13.8386	10.7152	6.65637
b1312	ycjP	21.1411	-0.217519	0.429953	-0.505913	0.612917	0.789502	16.4114	25.3836	26.336	17.0321	23.3786	18.305
b1313	ycjQ	68.9482	0.479131	0.296293	1.61708	0.10586	0.270822	52.5166	52.7198	67.4202	79.838	95.4628	65.7316
b1314	ycjR	64.4209	0.69073	0.292827	2.35884	0.0183324	0.0758741	54.7048	48.8146	44.2445	77.7089	94.4887	66.5637
b1315	ycjS	70.0441	0.423103	0.346326	1.22169	0.221825	0.448847	54.7048	43.9332	81.1149	83.0315	64.2913	93.1892
b1316	ycjT	73.5547	0.32165	0.339597	0.947151	0.343562	0.578156	51.4225	81.0323	63.2064	106.451	75.9806	63.2355
b1317	ycjU	19.4599	-0.221146	0.483529	-0.457359	0.647413	0.814345	13.1292	22.4547	27.3894	14.9031	15.5858	23.2973
b1318	ycjV	13.919	0.333372	0.722559	0.461377	0.644528	0.81303	4.37638	17.5733	14.7482	25.5481	14.6117	6.65637
b1319	ompG	3.47	-0.531087	0.996233	-0.533095	0.593968	NA	2.18819	5.85775	4.21376	4.25802	0.97411	3.32818
b1320	ycjW	54.6801	0.28861	0.345105	0.836297	0.402988	0.631464	38.2934	52.7198	56.8858	43.6448	63.3172	73.22
b1321	ycjX	998.748	-1.74975	0.182057	-9.61099	7.18561e-22	1.44876e-19	1394.97	1692.89	1531.7	423.673	444.194	505.052
b1322	ycjF	614.495	-1.95794	0.189205	-10.3482	4.26231e-25	9.49823e-23	936.546	1068.06	928.081	248.03	225.02	281.232
b1323	tyrR	2162.51	0.562529	0.184062	3.0562	0.00224162	0.0147376	2024.08	1670.44	1544.34	2448.36	2682.7	2605.14
b1324	tpx	19625.7	-0.521917	0.183174	-2.8493	0.00438157	0.0248015	23223.3	23445.7	22742.7	18757.7	13974.6	15610
b1325	ycjG	859.512	0.00494168	0.205328	0.0240673	0.980799	0.991335	978.122	834.73	761.637	876.089	747.143	959.349
b1326	mpaA	928.378	0.895972	0.199312	4.49531	6.94674e-06	0.000101773	763.679	588.704	595.194	1169.89	1134.84	1317.96
b1327	ycjY	151.932	0.476937	0.270662	1.76211	0.0780504	0.220457	136.762	114.226	130.627	163.934	142.22	223.82
b1328	pgrR	117.418	0.0585942	0.289425	0.20245	0.839565	0.923121	105.033	105.44	134.84	90.483	148.065	120.647
b1329	mppA	573.993	0.257006	0.24044	1.0689	0.285116	0.516994	628.011	471.549	469.834	648.284	512.382	713.895
b1330	ynaI	266.928	1.57109	0.267522	5.87277	4.28579e-09	1.48738e-07	126.915	160.112	115.878	395.996	483.159	319.506
b1331	insH4	4.95791	-0.754651	0.844182	-0.893944	0.371352	0.603803	6.56458	4.88146	7.37408	1.06451	4.87055	4.99228
b1332	ynaJ	1379.25	-1.4952	0.287209	-5.20596	1.92998e-07	4.46532e-06	1530.64	2191.78	2386.04	850.54	537.709	778.795
b1333	uspE	39702.3	0.524224	0.170411	3.07624	0.0020963	0.0139336	36891.8	29943.9	30866.9	48430.8	43691.8	48388.5
b1334	fnr	6322.38	-0.811225	0.163867	-4.95051	7.4018e-07	1.46445e-05	8291.06	8074.91	7797.56	4943.57	4022.1	4805.07
b1335	ogt	140.881	-0.354231	0.252467	-1.40308	0.160594	0.357306	146.609	156.207	171.711	127.741	97.411	145.608
b1336	abgT	59.9247	-0.422578	0.342538	-1.23367	0.217327	0.443024	57.9871	61.5064	86.3821	61.7414	37.0162	54.915
b1337	abgB	183.488	-0.0557543	0.320378	-0.174026	0.861845	0.93088	192.561	181.59	187.512	146.902	134.427	257.934
b1338	abgA	62.8634	-0.528372	0.277197	-1.90612	0.0566341	0.176186	70.0222	82.0085	70.5805	57.4833	43.835	53.2509
b1339	abgR	162.365	-0.6034	0.306414	-1.96923	0.0489266	0.158134	198.031	180.614	208.581	173.514	88.644	124.807
b1340	smrA	171.618	-0.0693497	0.315148	-0.220055	0.825829	0.918455	191.467	198.187	138.001	138.386	137.35	226.317
b1341	dgcM	1411.87	1.31738	0.33784	3.89942	9.64243e-05	0.00104414	1218.82	638.495	568.858	1886.3	1997.9	2160.82
b1342	zntB	1835.6	0.574314	0.262502	2.18785	0.0286805	0.106624	1729.77	1482.01	1213.56	2130.08	1734.89	2723.29
b1343	dbpA	336.675	0.366643	0.25814	1.42033	0.155513	0.34912	365.428	249.931	267.574	350.223	335.094	451.801
b1344	ttcA	450.842	0.0496587	0.179019	0.277394	0.781478	0.896747	391.686	480.336	457.193	443.899	451.013	480.923
b1345	intR	124.628	0.699506	0.234103	2.98803	0.00280786	0.0177971	96.2805	86.89	102.184	144.773	141.246	176.394
b1346	xisR	2.63475	-0.0970655	1.22134	-0.0794746	0.936655	NA	0	3.90517	4.21376	2.12901	3.89644	1.66409
b1347	rcbA	0	NA	NA	NA	NA	NA	0	0	0	0	0	0
b1348	ralR	0	NA	NA	NA	NA	NA	0	0	0	0	0	0
b1349	recT	40.2799	-0.099889	0.330891	-0.301879	0.762745	0.885984	38.2934	38.0754	48.4583	46.8383	35.068	34.9459
b1350	recE	63.7241	0.432014	0.398329	1.08457	0.278114	0.510025	38.2934	67.3642	56.8858	95.8056	45.7832	78.2123
b1351	racC	7.64433	0.318025	0.937952	0.339063	0.734562	0.868753	2.18819	9.76292	8.42752	2.12901	17.534	5.82432
b1352	kilR	2.18651	2.38401	1.9785	1.20496	0.22822	NA	0	0	2.10688	8.51605	0	2.49614
b1353	sieB	7.82654	1.78846	0.852503	2.0979	0.0359142	0.126191	4.37638	1.95258	4.21376	12.7741	19.4822	4.16023
b1355	ydaG	1.5793	1.84635	1.52757	1.20868	0.226785	NA	1.0941	0.976292	0	2.12901	1.94822	3.32818
b1356	racR	1096.34	-0.108363	0.203147	-0.533422	0.593742	0.774462	928.888	1166.67	1316.8	1064.51	1022.82	1078.33
b1357	ydaS	40.2335	0.575171	0.458552	1.25432	0.209725	0.431895	18.5996	38.0754	40.0307	46.8383	66.2395	31.6177
b1358	ydaT	25.4841	-0.536015	0.411953	-1.30116	0.193205	0.408626	24.0701	41.0043	25.2826	21.2901	20.4563	20.8012
b1359	ydaU	23.5948	0.66383	0.615286	1.0789	0.280634	0.513062	32.8229	11.7155	10.5344	19.1611	22.4045	44.9305
b1360	ydaV	5.8597	0.493116	0.845665	0.58311	0.559819	0.754121	6.56458	3.90517	4.21376	2.12901	11.6893	6.65637
b1361	ydaW	28.5113	0.709679	0.50811	1.3967	0.162503	0.360418	32.8229	19.5258	12.6413	44.7093	21.4304	39.9382
b1362	rzpR	1.70799	-2.00649	1.97995	-1.01341	0.310866	NA	0	3.90517	4.21376	2.12901	0	0
b1363	trkG	48.5482	0.41027	0.347004	1.18232	0.237079	0.465062	30.6347	46.862	47.4048	48.9673	69.1618	48.2587
b1365	ynaK	2.19334	0.509202	1.6008	0.318091	0.750416	NA	5.47048	0	0	2.12901	3.89644	1.66409
b1366	ydaY	5.82285	-1.00614	0.832878	-1.20803	0.227037	0.45386	10.941	3.90517	8.42752	6.38704	1.94822	3.32818
b1368	ynaA	31.7784	-0.542301	0.532788	-1.01786	0.308747	0.544681	21.8819	33.1939	57.9392	34.0642	13.6375	29.9537
b1370	insH5	0	NA	NA	NA	NA	NA	0	0	0	0	0	0
b1372	stfR	130.62	-0.0664622	0.229362	-0.28977	0.771992	0.892487	121.445	139.61	140.108	119.225	116.893	146.44
b1373	tfaR	9.82295	0.550208	0.655486	0.839391	0.40125	0.629686	4.37638	5.85775	13.6947	9.58056	14.6117	10.8166
b1374	pinR	17.971	0.264152	0.577873	0.457111	0.647591	0.814345	13.1292	9.76292	26.336	12.7741	17.534	28.2896
b1375	ynaE	2.44084	1.26338	1.98387	0.636824	0.524239	NA	4.37638	0	0	0	1.94822	8.32046
b1376	uspF	16046.6	-0.0694564	0.329424	-0.210842	0.83301	0.92136	22047.1	14111.3	13140.6	14239.9	11769.2	20971.7
b1377	ompN	15.3866	0.561018	0.575549	0.974753	0.329683	0.564447	6.56458	11.7155	18.9619	23.4191	11.6893	19.9691
b1378	ydbK	28544.7	0.25759	0.175713	1.46598	0.142655	0.330236	28042.8	24429.8	25537.5	31546.6	27257.6	34454.2
b1379	hslJ	571.519	0.415969	0.23388	1.77856	0.0753121	0.214728	521.884	527.198	420.323	621.672	548.424	789.612
b1380	ldhA	1957.09	0.234094	0.175588	1.3332	0.182465	0.392759	2030.64	1677.27	1688.66	1999.14	2055.37	2291.45
b1381	ydbH	493.961	0.0931719	0.187362	0.497283	0.618989	0.793573	426.697	499.862	507.758	468.383	497.77	563.295
b1382	ynbE	7.15355	-0.86035	0.944171	-0.911223	0.362178	0.594364	13.1292	1.95258	12.6413	2.12901	9.7411	3.32818
b1383	ydbL	43.2282	-0.22669	0.368624	-0.614963	0.538579	0.736351	52.5166	49.7909	37.9238	31.9352	33.1198	54.083
b1384	feaR	348.261	-1.66745	0.364434	-4.57544	4.75209e-06	7.26367e-05	442.015	564.297	582.552	242.707	97.411	160.585
b1385	feaB	621.619	-0.183293	0.320048	-0.572705	0.566844	0.7595	761.491	623.851	598.354	533.318	396.463	816.237
b1386	tynA	97.8822	-0.0314904	0.32888	-0.0957502	0.923719	0.961176	109.41	92.7478	94.8096	114.967	61.369	113.99
b1387	paaZ	38.7988	-0.495906	0.390055	-1.27138	0.203595	0.424222	48.1402	47.8383	40.0307	44.7093	20.4563	31.6177
b1388	paaA	50.3828	-1.37176	0.37586	-3.64967	0.000262581	0.00254409	98.4687	58.5775	61.0995	31.9352	21.4304	30.7857
b1389	paaB	3.02829	-1.53477	1.22629	-1.25156	0.21073	NA	2.18819	2.92888	8.42752	2.12901	0	2.49614
b1390	paaC	22.2481	-1.18425	0.540231	-2.19212	0.0283711	0.106022	39.3875	32.2176	21.0688	19.1611	5.84466	15.8089
b1391	paaD	28.3421	-0.663578	0.437063	-1.51827	0.128947	0.309502	42.6697	32.2176	29.4963	25.5481	12.6634	27.4575
b1392	paaE	45.4547	-0.0536708	0.413622	-0.129758	0.896758	0.947682	53.6107	49.7909	35.817	39.3867	29.2233	64.8996
b1393	paaF	37.88	0.150665	0.432651	0.348237	0.727662	0.863808	51.4225	32.2176	24.2291	44.7093	27.2751	47.4266
b1394	paaG	25.0224	-0.142756	0.39842	-0.358304	0.720116	0.859834	27.3524	27.3362	24.2291	17.0321	29.2233	24.9614
b1395	paaH	46.519	0.058318	0.511742	0.11396	0.90927	0.953664	65.6458	28.3125	43.1911	36.1932	29.2233	76.5482
b1396	paaI	23.4421	0.358233	0.471851	0.759207	0.447729	0.665386	29.5406	18.5496	13.6947	28.7417	18.5081	31.6177
b1397	paaJ	546.199	-1.81774	0.361429	-5.02932	4.92218e-07	1.04009e-05	887.312	910.881	755.317	239.514	136.375	347.795
b1398	paaK	837.258	-1.18452	0.373804	-3.16882	0.0015306	0.0108552	1052.52	1374.62	1061.87	517.35	282.492	734.697
b1399	paaX	965.154	-0.0253418	0.247167	-0.102529	0.918337	0.957674	1125.82	940.169	855.393	932.507	764.677	1172.35
b1400	paaY	295.736	0.0547457	0.261443	0.209398	0.834137	0.921609	246.172	309.485	314.979	291.675	237.683	374.421
b1402	insD2	0	NA	NA	NA	NA	NA	0	0	0	0	0	0
b1403	insC2	0	NA	NA	NA	NA	NA	0	0	0	0	0	0
b1404	insI2	0	NA	NA	NA	NA	NA	0	0	0	0	0	0
b1406	pdxI	1056.02	-0.360106	0.180186	-1.99853	0.0456596	0.151713	1231.95	1293.59	1035.53	995.313	872.803	906.93
b1407	ydbD	21.9621	0.342058	0.44608	0.766808	0.443195	0.661696	15.3173	20.5021	22.1222	32.9997	17.534	23.2973
b1408	ynbA	2.66882	-1.1872	1.42879	-0.830914	0.406022	NA	2.18819	7.81034	1.05344	1.06451	3.89644	0
b1409	ynbB	1.57405	-1.14185	1.74184	-0.655541	0.512119	NA	4.37638	0	2.10688	2.12901	0	0.832046
b1410	ynbC	42.0585	-0.45807	0.336402	-1.36168	0.1733	0.377609	47.0461	55.6487	43.1911	42.5802	27.2751	36.61
b1411	ynbD	51.327	-0.280364	0.357287	-0.784703	0.432628	0.656892	63.4576	36.1228	69.5271	42.5802	49.6796	46.5946
b1412	azoR	364.995	-0.372775	0.294261	-1.26682	0.205221	0.425774	320.57	432.497	482.476	262.933	416.919	274.575
b1413	hrpA	3494.33	-0.202753	0.162631	-1.2467	0.212507	0.435505	4068.94	3825.11	3324.66	3133.91	3219.43	3393.92
b1414	ydcF	510.537	-0.109229	0.262165	-0.41664	0.676942	0.833008	615.976	508.648	465.621	399.19	448.091	625.699
b1415	aldA	26617.9	-2.55708	0.459816	-5.56108	2.68104e-08	7.41266e-07	42282.4	49152.4	45076.7	10703.6	2903.82	9588.5
b1418	cybB	191.849	0.0777746	0.303996	0.255841	0.798074	0.902522	183.808	187.448	188.566	174.579	272.751	143.944
b1419	ydcA	53.4915	0.463908	0.40984	1.13192	0.257666	0.488311	45.952	36.1228	52.672	63.8704	85.7217	36.61
b1420	mokB	0	NA	NA	NA	NA	NA	0	0	0	0	0	0
b1421	trg	126.893	-0.770547	0.304143	-2.5335	0.0112929	0.0528331	128.009	166.946	185.405	87.2895	73.0583	120.647
b1422	ydcI	1732.75	-2.94188	0.35542	-8.27718	1.26125e-16	1.36927e-14	2275.72	3693.31	3229.85	556.737	252.295	388.565
b1423	ydcJ	4455.01	-0.0261078	0.30793	-0.084785	0.932432	0.965371	5819.5	3842.69	3823.99	5149.02	3085.98	5008.92
b1424	opgD	732.064	0.265225	0.209671	1.26495	0.205888	0.42672	742.891	611.159	641.545	692.993	768.573	935.22
b1426	ydcH	3204.84	0.528759	0.183283	2.88494	0.00391494	0.0228948	2241.8	2618.42	3011.79	3728.96	3793.19	3834.9
b1427	rimL	352.467	0.0403087	0.193487	0.208328	0.834973	0.921609	315.1	335.845	391.88	355.545	331.198	385.237
b1428	ydcK	1153.7	0.794314	0.359658	2.20853	0.0272075	0.102946	1170.68	729.29	632.064	1403.02	1016	1971.12
b1429	tehA	271.009	0.36932	0.184834	1.99812	0.0457037	0.151713	263.677	219.666	226.49	301.255	302.948	312.017
b1430	tehB	257.868	0.290333	0.423172	0.686088	0.492658	0.702169	153.173	239.192	303.391	271.449	416.919	163.081
b1431	ydcL	1127.69	1.77196	0.238919	7.41657	1.20195e-13	9.08762e-12	576.589	482.288	474.048	1462.63	1595.59	2174.97
b1432	insQ	961.729	-0.426376	0.198056	-2.1528	0.0313343	0.113587	922.323	1108.09	1277.82	852.669	800.719	808.749
b1433	ydcO	240.295	-0.891773	0.421253	-2.11695	0.0342637	0.121501	185.996	380.754	369.758	159.676	241.579	104.006
b1434	sutR	156.365	-0.896584	0.241197	-3.71724	0.000201415	0.00203045	169.585	237.239	203.314	103.257	120.79	104.006
b1435	rlhA	265.737	-0.268839	0.262525	-1.02405	0.305812	0.542439	223.196	343.655	304.444	201.192	269.829	252.11
b1436	yncJ	26.6316	0.253893	0.366395	0.692948	0.488342	0.698591	25.1642	24.4073	23.1757	32.9997	28.2492	25.7934
b1438	hicB	102.342	0.668692	0.243797	2.74282	0.00609139	0.0321182	85.3395	76.1508	75.8477	128.805	108.126	139.784
b1439	ydcR	155.441	0.322803	0.197944	1.63078	0.102937	0.26602	145.515	128.871	140.108	176.708	167.547	173.898
b1440	ydcS	4299.08	0.479491	0.266133	1.80169	0.0715935	0.207763	4543.78	3118.28	3111.86	5187.34	3977.29	5855.94
b1441	ydcT	1380.9	0.47473	0.273937	1.73299	0.0830983	0.22996	1481.41	1061.23	924.921	1636.15	1300.44	1881.26
b1442	ydcU	447.478	0.798691	0.235127	3.39686	0.000681651	0.00561116	403.721	299.722	277.055	541.834	526.02	636.515
b1443	ydcV	591.948	1.05648	0.245986	4.29489	1.74779e-05	0.000237184	496.72	326.082	330.78	823.928	741.298	832.878
b1444	patD	2057.05	1.04362	0.158498	6.5844	4.56727e-11	2.19748e-09	1322.76	1327.76	1381.06	2971.04	2479.11	2860.57
b1445	ortT	32.646	0.0989526	0.437984	0.225927	0.821258	0.915777	20.7878	41.0043	32.6566	25.5481	46.7573	29.1216
b1446	ydcY	805.279	-0.417434	0.193712	-2.15492	0.0311678	0.113388	926.699	929.43	907.012	587.607	803.641	677.285
b1447	ydcZ	52.976	-0.418641	0.321055	-1.30395	0.192249	0.407196	45.952	65.4116	70.5805	42.5802	40.9126	52.4189
b1448	mnaT	206.83	-0.0440654	0.205632	-0.214292	0.830319	0.920255	233.042	185.496	211.741	189.482	218.201	203.019
b1449	curA	2346.23	0.334389	0.204785	1.63288	0.102495	0.26555	2372	1926.22	1928.85	2643.17	2243.38	2963.75
b1450	mcbR	189.207	1.47964	0.47605	3.10816	0.00188255	0.0128147	156.456	91.7715	51.6186	283.159	169.495	382.741
b1451	yncD	238.381	-0.489012	0.20068	-2.43677	0.0148192	0.0643419	311.817	267.504	255.986	187.353	216.253	191.371
b1452	yncE	449.141	-1.83877	0.398616	-4.61288	3.97129e-06	6.29755e-05	871.995	744.911	489.85	146.902	138.324	302.865
b1453	ansP	53.1246	-0.491587	0.414837	-1.18501	0.236013	0.463702	35.0111	75.1745	75.8477	55.3543	34.0939	43.2664
b1454	yncG	282.617	-0.238884	0.373638	-0.639347	0.522597	0.724653	385.122	263.599	269.681	229.933	164.625	382.741
b1455	yncH	0.554697	2.55045	3.98178	0.640531	0.521828	NA	0	0	0	0	0	3.32818
b1456	rhsE	17.0594	0.253609	0.471421	0.537966	0.590601	0.772029	13.1292	17.5733	15.8016	19.1611	23.3786	13.3127
b1457	ydcD	8.20199	1.75875	0.934031	1.88297	0.059705	0.183315	3.28229	7.81034	0	14.9031	16.5599	6.65637
b1459	yncI	9.11213	0.462729	0.774746	0.597265	0.550331	0.744917	13.1292	5.85775	4.21376	4.25802	9.7411	17.473
b1460	ydcC	16.9523	0.479415	0.629172	0.761977	0.446074	0.664092	17.5055	14.6444	10.5344	6.38704	24.3528	28.2896
b1461	pptA	309.099	0.257159	0.184799	1.39156	0.164055	0.362532	257.113	311.437	276.001	329.997	355.55	324.498
b1462	yddH	223.868	0.243422	0.282985	0.860195	0.389681	0.618962	212.255	195.258	207.528	300.191	167.547	260.43
b1463	nhoA	1013.33	0.838013	0.28577	2.93248	0.00336271	0.0204272	891.688	619.946	669.988	1178.41	1026.71	1693.21
b1464	yddE	767.38	-0.1631	0.192112	-0.848984	0.39589	0.624515	776.808	887.45	767.958	748.348	622.457	801.26
b1465	narV	94.5737	0.648	0.412258	1.57183	0.11599	0.289052	39.3875	102.511	79.008	119.225	86.6958	140.616
b1466	narW	111.003	0.985175	0.522106	1.88693	0.0591701	0.18233	30.6347	78.1034	114.825	134.128	94.4887	213.836
b1467	narY	466.668	1.3892	0.410557	3.3837	0.000715164	0.00584557	141.138	342.679	289.696	607.833	485.107	933.556
b1468	narZ	1061.52	1.70822	0.349901	4.88201	1.05011e-06	1.94156e-05	386.216	503.767	602.568	1453.05	1092.95	2330.56
b1469	narU	216.159	2.09164	0.409025	5.11373	3.15865e-07	6.96549e-06	85.3395	78.1034	83.2218	281.03	208.46	560.799
b1470	yddJ	0.680266	0.0689673	3.02737	0.0227812	0.981825	NA	0	1.95258	0	2.12901	0	0
b1471	yddK	0.650134	-0.030806	3.04458	-0.0101183	0.991927	NA	0	1.95258	0	0	1.94822	0
b1472	yddL	0.679539	2.81515	2.84979	0.987843	0.323229	NA	0	0	0	2.12901	1.94822	0
b1473	yddG	33.4409	1.13543	0.487161	2.33072	0.0197684	0.0807128	30.6347	19.5258	12.6413	38.3222	66.2395	33.2818
b1474	fdnG	599.138	1.56147	0.701104	2.22716	0.0259366	0.0994705	102.845	362.204	444.552	521.608	1839.12	324.498
b1475	fdnH	193.063	1.34977	0.787798	1.71334	0.0866502	0.236695	32.8229	152.302	141.161	154.353	607.845	69.8919
b1476	fdnI	55.4174	1.10779	0.683331	1.62116	0.104984	0.269233	33.917	29.2888	42.1376	45.7738	159.754	21.6332
b1477	yddM	241.717	-0.0418486	0.259431	-0.161309	0.87185	0.936276	314.006	205.998	215.955	250.159	210.408	253.774
b1478	adhP	2324.1	0.496795	0.502775	0.988107	0.3231	0.558142	2870.91	1542.54	1370.53	2016.17	1419.28	4725.19
b1479	maeA	10500.8	2.46032	0.307893	7.99083	1.34036e-15	1.31979e-13	3202.42	3206.14	3279.36	19119.6	23154.6	11042.9
b1480	sra	25497.9	0.689059	0.271043	2.54225	0.0110142	0.0518735	18493.5	19892.9	20179.7	31157	22294.5	40969.9
b1481	bdm	18.0324	1.80381	0.719378	2.50746	0.0121601	0.0559022	8.75277	3.90517	11.5878	8.51605	37.9903	37.4421
b1482	osmC	14191.8	0.254408	0.363026	0.700797	0.48343	0.696204	17164.2	10955	10712.4	13571.4	10417.1	22330.5
b1483	ddpF	349.461	-0.12082	0.233144	-0.518223	0.604302	0.782691	423.415	314.366	355.009	329.997	285.414	388.565
b1484	ddpD	52.0316	-0.300522	0.426629	-0.70441	0.481177	0.694404	70.0222	64.4353	37.9238	54.2898	27.2751	58.2432
b1485	ddpC	42.1901	-0.725826	0.329945	-2.19984	0.0278182	0.104788	51.4225	53.6961	52.672	36.1932	23.3786	35.778
b1486	ddpB	27.7886	-0.331034	0.448397	-0.738259	0.460357	0.67642	25.1642	35.1465	32.6566	27.6772	13.6375	32.4498
b1487	ddpA	203.957	-0.759339	0.341018	-2.22668	0.0259687	0.0995036	315.1	235.286	219.116	173.514	93.5146	187.21
b1488	ddpX	93.2889	-1.56796	0.384811	-4.07462	4.6089e-05	0.000545086	176.149	120.084	122.199	64.9349	27.2751	49.0907
b1489	dosP	676.2	0.778126	0.829108	0.93851	0.347982	0.582313	1187.09	160.112	147.482	473.705	424.712	1664.09
b1490	dosC	607.987	0.798589	0.827708	0.96482	0.334635	0.569471	1064.56	149.373	117.985	432.189	416.919	1466.9
b1491	digH	312.929	0.661562	0.291085	2.27275	0.0230414	0.0907511	323.852	194.282	209.635	334.255	360.421	455.129
b1492	gadC	122726	0.10957	0.402329	0.272339	0.785361	0.896747	168908	94799.9	90495.8	112057	82091.2	188002
b1493	gadB	182596	-0.00700723	0.322609	-0.0217205	0.982671	0.992516	242231	160917	145971	179639	130908	235911
b1494	pqqL	67.9592	0.0501582	0.379593	0.132137	0.894876	0.947029	45.952	83.9611	70.5805	46.8383	73.0583	87.3648
b1495	yddB	23.7425	-0.207149	0.584586	-0.354352	0.723075	0.860514	13.1292	27.3362	35.817	29.8062	9.7411	26.6255
b1496	yddA	4.00224	-0.714467	1.34234	-0.532253	0.594551	0.775081	10.941	3.90517	0	6.38704	1.94822	0.832046
b1497	ydeM	22.4877	0.0493093	0.504209	0.0977955	0.922095	0.960815	10.941	34.1702	21.0688	22.3546	21.4304	24.9614
b1498	ydeN	1901.05	-1.13417	0.228284	-4.96823	6.75683e-07	1.34945e-05	2686.01	2517.86	2631.49	1506.28	1063.73	1000.95
b1499	ydeO	5.19646	0.162538	0.854867	0.190132	0.849206	0.926207	6.56458	3.90517	4.21376	4.25802	9.7411	2.49614
b1500	safA	0.709671	2.87994	3.82521	0.752884	0.45152	NA	0	0	0	4.25802	0	0
b1501	ydeP	71.0487	-0.757487	0.346367	-2.18695	0.028746	0.106764	72.2103	124.965	70.5805	46.8383	58.4466	53.2509
b1502	ydeQ	3.72128	0.186637	1.2448	0.149934	0.880817	NA	0	1.95258	8.42752	6.38704	3.89644	1.66409
b1503	ydeR	2.68139	1.50697	1.2546	1.20115	0.229692	NA	2.18819	1.95258	0	6.38704	3.89644	1.66409
b1504	ydeS	2.34858	0.272774	1.28697	0.21195	0.832146	NA	2.18819	0	4.21376	2.12901	3.89644	1.66409
b1505	ydeT	12.8075	-0.366726	0.691702	-0.530179	0.595988	0.77548	4.37638	13.6681	25.2826	8.51605	11.6893	13.3127
b1506	yneL	2.91578	0.903367	1.12825	0.80068	0.423317	NA	0	3.90517	2.10688	4.25802	3.89644	3.32818
b1507	hipA	560.805	0.318557	0.191544	1.6631	0.0962919	0.255932	478.12	521.34	498.277	601.446	548.424	717.224
b1508	hipB	254.532	0.338383	0.269221	1.2569	0.20879	0.431229	184.902	255.789	233.864	279.965	224.045	348.627
b1511	lsrK	2545.71	-0.272264	0.786301	-0.346259	0.729148	0.864281	4786.67	1862.77	1706.57	943.152	531.864	5443.25
b1512	lsrR	2876.41	-0.714445	0.691639	-1.03297	0.301616	0.538389	5121.46	2945.47	2656.78	1208.21	540.631	4785.93
b1513	lsrA	4511.95	-0.739835	1.11161	-0.665555	0.505696	0.711098	9155.4	3936.41	3840.84	1544.6	463.677	8130.75
b1514	lsrC	1360.63	-0.657465	1.12532	-0.584248	0.559054	0.753592	2952.97	1069.04	974.432	440.706	171.443	2555.21
b1515	lsrD	769.028	-0.766349	0.808752	-0.94757	0.343348	0.578027	1645.52	603.349	657.347	216.095	119.816	1372.04
b1516	lsrB	1723.48	-0.0715185	1.10889	-0.0644954	NA	NA	3532.84	808.37	957.577	569.511	418.867	4053.73
b1517	lsrF	1835.75	-0.348175	1.11354	-0.312674	0.754528	0.881097	4428.9	898.189	841.699	706.832	475.366	3663.5
b1518	lsrG	1029.86	-0.295714	1.12142	-0.263696	0.792014	0.899811	2435.46	497.909	471.941	405.577	235.735	2132.53
b1519	tam	2318.33	0.486974	0.434706	1.12024	0.262612	0.492578	3114.89	1388.29	1289.41	2450.49	1898.54	3768.34
b1520	yneE	281.613	0.221447	0.300849	0.736071	0.461688	0.677568	353.393	236.263	190.673	325.739	259.113	324.498
b1521	uxaB	727.009	1.26186	0.371245	3.399	0.00067633	0.00559293	362.146	446.166	475.102	1104.96	1415.38	558.303
b1522	dgcF	249.787	-0.427755	0.240363	-1.77962	0.0751379	0.214496	227.572	347.56	284.429	204.385	208.46	226.317
b1523	yneG	335.964	-0.0286051	0.274555	-0.104187	0.917021	0.956793	240.701	368.062	408.735	352.352	355.55	290.384
b1524	glsB	121.963	-0.0701656	0.208236	-0.336952	0.736153	0.870149	120.351	128.871	125.359	122.418	120.79	113.99
b1525	sad	275.214	-0.768651	0.221093	-3.47659	0.000507829	0.00442418	314.006	367.086	359.223	185.224	243.528	182.218
b1526	yneJ	79.2497	-0.379833	0.251904	-1.50785	0.131593	0.314073	83.1513	87.8663	97.9699	70.2574	61.369	74.8841
b1527	yneK	5.78149	-1.10689	0.997309	-1.10987	0.267054	0.498328	4.37638	7.81034	11.5878	4.25802	0	6.65637
b1528	ydeA	65.4866	0.199653	0.42924	0.465132	0.641837	0.81169	78.7749	39.0517	65.3133	79.838	40.9126	89.0289
b1529	marC	354.089	0.0530708	0.259214	0.204737	0.837777	0.922682	428.886	289.959	324.46	338.513	311.715	431
b1530	marR	55.9549	-1.06004	0.409841	-2.58646	0.00969662	0.0469206	50.3284	101.534	74.7943	31.9352	49.6796	27.4575
b1531	marA	108.153	-1.19354	0.475981	-2.50753	0.0121578	0.0559022	88.6218	144.491	218.062	70.2574	92.5405	34.9459
b1532	marB	45.192	-0.783437	0.390102	-2.00828	0.0446131	0.149322	37.1993	71.2693	63.2064	27.6772	30.1974	41.6023
b1533	eamA	374.43	-0.83762	0.296849	-2.8217	0.00477694	0.0266828	362.146	549.653	528.827	286.352	196.77	322.834
b1534	ydeE	252.817	0.263465	0.182494	1.44369	0.148825	0.339873	225.384	218.689	245.452	283.159	257.165	287.056
b1535	dgcZ	99.1587	1.27415	0.277271	4.59534	4.32037e-06	6.77498e-05	70.0222	55.6487	48.4583	129.87	163.651	127.303
b1536	ydeI	294.118	0.853146	0.398384	2.14151	0.0322325	0.116088	227.572	197.211	204.367	324.674	214.304	596.577
b1537	ydeJ	60.8204	1.78767	0.472925	3.78003	0.000156809	0.00162728	27.3524	26.3599	28.4429	67.0639	58.4466	157.257
b1538	dcp	1625.72	0.248022	0.279784	0.886474	0.375362	0.606939	1276.81	1555.23	1626.51	1757.5	2273.57	1264.71
b1539	ydfG	1888.22	-0.147922	0.239315	-0.618107	0.536505	0.73442	1643.33	1994.57	2316.52	1796.89	2101.16	1476.88
b1540	rspR	308.38	-0.0388641	0.216618	-0.179414	0.857613	0.928679	266.959	299.722	370.811	295.933	327.301	289.552
b1541	ydfZ	519.303	-1.46693	0.676698	-2.16777	0.0301759	0.110715	336.982	947.98	1002.88	256.546	506.537	64.8996
b1542	ydfI	44.7845	-0.333434	0.391734	-0.851175	0.394672	0.622826	48.1402	36.1228	65.3133	52.1608	37.0162	29.9537
b1543	ydfJ	31.1499	-0.184655	0.457138	-0.403936	0.68626	0.83808	28.4465	31.2414	40.0307	25.5481	17.534	44.0984
b1544	ydfK	5.60777	-0.269892	0.99394	-0.271538	0.785978	0.896747	4.37638	7.81034	6.32064	0	6.81877	8.32046
b1545	pinQ	14.2566	0.112276	0.650572	0.17258	0.862982	0.930921	4.37638	17.5733	18.9619	21.2901	11.6893	11.6486
b1546	tfaQ	38.8263	0.875787	0.385953	2.26915	0.0232591	0.0910998	20.7878	40.028	21.0688	52.1608	50.6537	48.2587
b1547	stfQ	25.6203	-0.0820962	0.44937	-0.182692	0.85504	0.928028	32.8229	23.431	23.1757	15.9676	23.3786	34.9459
b1548	nohA	89.1225	0.385734	0.426908	0.903553	0.366232	0.598467	45.952	91.7715	93.7562	147.966	72.0842	83.2046
b1549	ydfO	3.60815	2.06746	1.12171	1.84314	0.0653091	NA	2.18819	1.95258	0	6.38704	7.79288	3.32818
b1550	gnsB	326.981	0.633674	0.253194	2.50272	0.0123243	0.0564729	193.655	265.551	309.711	383.222	366.266	443.481
b1551	ynfN	0.678946	-1.6494	2.44168	-0.675517	0.499347	NA	2.18819	0	1.05344	0	0	0.832046
b1552	cspI	25.7693	-0.263341	0.434795	-0.605668	0.544735	0.74055	18.5996	34.1702	31.6032	17.0321	28.2492	24.9614
b1553	rzpQ	0.440064	0.614306	3.32313	0.184858	0.853341	NA	0	0.976292	0	0	0	1.66409
b1554	rrrQ	3.50272	0.329911	1.17408	0.280995	0.778714	NA	0	2.92888	6.32064	4.25802	5.84466	1.66409
b1555	ydfR	0.996883	0.819655	2.21161	0.370615	0.710924	NA	2.18819	0	0	2.12901	0	1.66409
b1556	essQ	0.729397	-3.05294	3.77228	-0.809309	0.418338	NA	4.37638	0	0	0	0	0
b1557	cspB	180.525	0.564209	0.316023	1.78534	0.0742055	0.212575	117.068	168.899	150.642	212.901	280.544	153.096
b1558	cspF	7.25644	-1.84789	0.999326	-1.84914	0.0644383	0.192678	6.56458	11.7155	15.8016	0	7.79288	1.66409
b1559	ydfT	25.6817	-0.60091	0.497216	-1.20855	0.226836	0.453813	29.5406	21.4784	42.1376	10.6451	25.3269	24.9614
b1560	ydfU	20.1509	-0.961092	0.51066	-1.88206	0.0598283	0.18356	15.3173	39.0517	25.2826	15.9676	13.6375	11.6486
b1561	rem	23.5418	0.128011	0.533314	0.24003	0.810307	0.909814	21.8819	21.4784	24.2291	29.8062	9.7411	34.1139
b1562	hokD	279.09	-0.0118788	0.300238	-0.0395647	0.96844	0.984177	264.771	262.623	313.925	215.03	233.786	384.405
b1563	relE	259.634	-0.0865315	0.32355	-0.267444	0.789127	0.898646	304.159	275.314	223.329	202.256	195.796	356.948
b1564	relB	643.806	0.150869	0.250244	0.602889	0.546582	0.741978	655.364	697.073	478.262	668.51	569.855	793.772
b1565	ydfV	22.2793	0.513654	0.460298	1.11592	0.264458	0.494356	15.3173	18.5496	21.0688	23.4191	37.0162	18.305
b1566	flxA	13.0369	0.105013	0.520843	0.201622	0.840213	0.923121	15.3173	11.7155	10.5344	17.0321	13.6375	9.98455
b1567	ydfW	3.16193	-1.44131	1.85751	-0.775937	0.437786	NA	7.65867	0	6.32064	0	0	4.99228
b1568	ydfX	3.23861	0.398729	1.1392	0.350009	0.726332	NA	2.18819	2.92888	3.16032	8.51605	0.97411	1.66409
b1569	dicC	2.0745	-0.539137	1.5845	-0.340256	0.733664	NA	4.37638	2.92888	0	3.19352	1.94822	0
b1570	dicA	784.529	-0.217413	0.222648	-0.976485	0.328824	0.563661	800.878	902.094	828.004	710.026	588.363	877.809
b1571	ydfA	6.65222	0.129843	0.861881	0.15065	0.880251	0.940683	6.56458	0.976292	11.5878	7.45154	5.84466	7.48841
b1572	ydfB	1.31313	-0.0516002	2.18397	-0.0236268	0.98115	NA	0	2.92888	1.05344	0	3.89644	0
b1573	ydfC	22.2536	0.0149402	0.463848	0.0322094	0.974305	0.98831	20.7878	24.4073	21.0688	19.1611	33.1198	14.9768
b1574	dicF	5.66186	0.943721	1.17414	0.803754	0.421539	0.645263	6.56458	1.95258	3.16032	10.6451	0	11.6486
b1575	dicB	0.528564	-1.03832	3.18465	-0.32604	0.744394	NA	0	0	2.10688	1.06451	0	0
b1576	ydfD	1.81345	0.221243	1.69384	0.130616	0.896079	NA	0	3.90517	1.05344	4.25802	0	1.66409
b1577	ydfE	12.0309	0.709134	0.650421	1.09027	0.275595	0.507362	10.941	3.90517	12.6413	10.6451	22.4045	11.6486
b1578	insD7	0	NA	NA	NA	NA	NA	0	0	0	0	0	0
b1579	intQ	19.9723	0.541813	0.45244	1.19754	0.231097	0.457712	19.6937	18.5496	10.5344	26.6127	19.4822	24.9614
b1580	rspB	14.8961	0.490929	0.48671	1.00867	0.313134	0.54794	8.75277	15.6207	12.6413	19.1611	16.5599	16.6409
b1581	rspA	33.0998	-0.138329	0.453386	-0.305102	0.760289	0.884755	35.0111	48.8146	20.0154	40.4512	24.3528	29.9537
b1582	ynfA	25.4012	-0.122987	0.482861	-0.254705	0.798951	0.903033	17.5055	34.1702	27.3894	35.1287	22.4045	15.8089
b1583	ynfB	726.01	1.59334	0.240563	6.62336	3.5112e-11	1.70878e-09	371.993	346.584	365.544	1142.22	1304.33	825.39
b1584	speG	519.911	1.72093	0.331531	5.19086	2.0933e-07	4.79083e-06	201.314	296.793	227.543	853.734	1026.71	513.372
b1585	ynfC	289.353	0.247843	0.231636	1.06997	0.284634	0.516994	272.43	263.599	258.093	301.255	257.165	383.573
b1586	ynfD	1748.75	0.0375615	0.180599	0.207983	0.835242	0.921609	2004.38	1628.46	1545.4	1780.92	1737.81	1795.56
b1587	ynfE	1222.93	2.39924	0.526652	4.55564	5.22259e-06	7.8413e-05	555.801	300.698	312.872	1871.4	3498.03	798.764
b1588	ynfF	597.706	2.64884	0.523731	5.05762	4.24512e-07	9.12378e-06	196.937	157.183	139.054	922.927	1798.21	371.925
b1589	ynfG	136.843	2.28314	0.530461	4.30408	1.67685e-05	0.000228288	55.7989	27.3362	56.8858	226.74	359.447	94.8532
b1590	ynfH	217.706	0.751354	0.38027	1.97584	0.0481726	0.156864	123.633	180.614	182.245	258.675	395.489	165.577
b1591	dmsD	227.717	0.408044	0.280922	1.45252	0.146358	0.335324	152.079	232.358	202.261	266.127	308.793	204.683
b1592	clcB	36.4865	-0.0763153	0.379659	-0.20101	0.840691	0.923121	25.1642	41.9806	45.2979	29.8062	35.068	41.6023
b1593	bidA	789.428	0.632053	0.212645	2.97233	0.00295545	0.0184563	576.589	634.59	646.812	769.638	1030.61	1078.33
b1594	mlc	1066.77	-0.476276	0.258333	-1.84365	0.065234	0.194371	1147.71	1347.28	1228.31	881.411	1131.92	663.973
b1595	ynfL	173.012	0.0801253	0.267918	0.299067	0.764889	0.887306	215.537	136.681	152.749	183.095	157.806	192.203
b1596	ynfM	4991.72	2.61025	0.218158	11.9649	5.42586e-33	2.87164e-30	1681.63	1321.9	1211.46	8699.14	9539.46	7496.73
b1597	asr	1480.72	4.93	0.25794	19.113	1.96952e-81	4.16947e-78	112.692	92.7478	76.9011	3292.52	2317.41	2992.04
b1598	ydgD	3281.87	0.138224	0.262745	0.526078	0.598834	0.778618	3481.41	3033.34	2860.09	3223.32	2623.28	4469.75
b1599	mdtI	13.4766	0.0444044	0.602282	0.0737269	0.941228	0.970097	8.75277	18.5496	12.6413	7.45154	12.6634	20.8012
b1600	mdtJ	3.97436	1.48108	0.952126	1.55555	0.119815	0.295111	2.18819	1.95258	2.10688	7.45154	6.81877	3.32818
b1601	tqsA	199.075	2.10593	0.22739	9.2613	2.01965e-20	3.71792e-18	62.3635	75.1745	87.4355	341.706	316.586	311.185
b1602	pntB	2289.02	-0.26832	0.236212	-1.13593	0.255986	0.486685	2134.58	2689.69	2678.9	2213.11	2395.34	1622.49
b1603	pntA	2194.72	-0.298842	0.214317	-1.39439	0.163199	0.361584	2285.57	2528.6	2449.25	1780.92	2421.64	1702.37
b1604	ydgH	1153.14	0.289619	0.203686	1.42189	0.155058	0.348558	1019.7	1053.42	1039.75	1315.73	1460.19	1030.07
b1605	ydgI	90.3257	0.687402	0.323484	2.12499	0.0335872	0.119402	83.1513	59.5538	65.3133	105.386	83.7735	144.776
b1606	folM	240.229	0.609569	0.259862	2.34574	0.0189891	0.0779825	184.902	193.306	192.78	276.772	225.02	368.596
b1607	ydgC	109.757	-1.63745	0.357421	-4.58129	4.62121e-06	7.08921e-05	142.232	154.254	202.261	54.2898	33.1198	72.388
b1608	rstA	1435.6	4.68112	0.184302	25.3991	2.57807e-142	1.09155e-138	117.068	111.297	94.8096	2834.78	2806.41	2649.23
b1609	rstB	1056.33	3.37985	0.217632	15.5301	2.16945e-54	3.06181e-51	156.456	177.685	221.222	2009.79	2050.5	1722.34
b1610	tus	535.56	-0.287175	0.290932	-0.987086	0.3236	0.558323	582.059	596.515	587.82	502.447	320.482	624.035
b1611	fumC	7555.75	-0.372578	0.452651	-0.823103	0.41045	0.638444	9445.33	8365.85	7767.01	7857.12	2573.6	9325.57
b1612	fumA	10171.1	-2.20913	0.331216	-6.66977	2.56199e-11	1.30692e-09	13108.4	18392.4	18674.3	5020.21	2399.23	3432.19
b1613	manA	2700.96	0.0770172	0.207105	0.371876	0.709985	0.85493	2486.88	2553.98	2845.34	2850.75	3204.82	2264
b1614	ydgA	19846.6	0.617274	0.175092	3.52542	0.000422812	0.00381702	17933.3	14381.8	14678.6	24122.8	22603.3	25359.9
b1615	uidC	10.1206	-0.24011	0.671834	-0.357395	0.720796	0.85984	4.37638	11.7155	16.855	6.38704	9.7411	11.6486
b1616	uidB	38.9819	-0.68439	0.372239	-1.83858	0.0659773	0.196033	45.952	41.0043	56.8858	40.4512	26.301	23.2973
b1617	uidA	151.488	0.169636	0.408638	0.415127	0.678049	0.833099	91.9041	167.922	167.497	200.127	189.952	91.5251
b1618	uidR	1060.79	-0.42988	0.157762	-2.72487	0.00643271	0.0335833	1259.3	1140.31	1253.59	945.281	831.89	934.388
b1619	hdhA	5382.38	0.827571	0.166103	4.98228	6.28396e-07	1.28136e-05	4099.58	3624	3915.64	7171.58	6111.57	7371.93
b1620	malI	106.513	-0.33645	0.234035	-1.43761	0.150546	0.343003	105.033	122.037	129.573	96.8701	85.7217	99.8455
b1621	malX	207.957	-0.174844	0.338631	-0.516328	0.605625	0.783563	161.926	252.86	246.505	179.902	265.932	140.616
b1622	malY	377.263	-0.293954	0.196933	-1.49266	0.135527	0.320391	449.674	411.019	385.559	361.932	363.343	292.048
b1623	add	2203.06	0.41907	0.19012	2.20424	0.0275075	0.103803	2090.82	1647.98	1917.26	2490.94	2795.7	2275.65
b1624	ydgJ	1464.71	0.454977	0.167863	2.7104	0.00672018	0.0348692	1364.34	1172.53	1170.37	1753.24	1554.68	1773.09
b1625	cnu	96.6769	-0.518119	0.279412	-1.85432	0.0636934	0.191203	97.3746	132.776	111.665	62.8059	84.7476	90.693
b1626	ydgK	429.365	-0.0114549	0.298711	-0.0383479	0.96941	0.984525	304.159	534.032	455.086	336.384	459.78	486.747
b1627	rsxA	48.7342	-0.011766	0.297403	-0.0395626	0.968442	0.984177	43.7638	54.6724	48.4583	42.5802	49.6796	53.2509
b1628	rsxB	21.0934	-0.179389	0.480681	-0.373197	0.709002	0.854621	16.4114	23.431	27.3894	12.7741	28.2492	18.305
b1629	rsxC	104.814	0.391867	0.303051	1.29307	0.195986	0.413249	65.6458	114.226	91.6493	131.999	124.686	100.678
b1630	rsxD	48.1089	0.546798	0.457862	1.19424	0.232383	0.459492	19.6937	44.9094	52.672	39.3867	72.0842	59.9073
b1631	rsxG	29.8312	0.752991	0.439342	1.71391	0.0865459	0.236562	12.0351	31.2414	23.1757	40.4512	32.1456	39.9382
b1632	rsxE	33.7257	0.704658	0.415363	1.69649	0.0897934	0.243085	22.976	22.4547	31.6032	28.7417	57.4725	39.1062
b1633	nth	30.8373	0.118855	0.379351	0.313311	0.754045	0.881097	26.2583	23.431	38.9773	32.9997	35.068	28.2896
b1634	dtpA	178.095	0.672931	0.301778	2.22989	0.0257547	0.0989521	135.668	129.847	146.428	166.063	300.026	190.539
b1635	gstA	3719.94	-0.000807123	0.237817	-0.00339388	0.997292	0.998476	4177.26	3537.11	3448.96	3896.09	2851.22	4409.01
b1636	pdxY	430.091	0.0326573	0.194613	0.167806	0.866736	0.933115	429.98	393.446	451.926	500.318	401.333	403.542
b1637	tyrS	1801.71	0.336935	0.210246	1.60258	0.109028	0.276422	1460.62	1658.72	1657.06	1969.34	2390.47	1674.08
b1638	pdxH	385.995	0.594599	0.274185	2.1686	0.0301128	0.110579	320.57	288.983	312.872	475.834	587.389	330.322
b1639	mliC	85.3694	0.189075	0.258811	0.730554	0.465051	0.680383	89.7159	80.056	69.5271	87.2895	103.256	82.3726
b1640	anmK	803.409	-0.2099	0.205517	-1.02133	0.307099	0.543419	778.996	836.682	969.165	755.799	841.631	638.179
b1641	slyB	12956.2	1.18092	0.201528	5.85981	4.63394e-09	1.59513e-07	8030.67	8121.78	7640.6	16878.8	21671	15394.5
b1642	slyA	1733.38	0.136062	0.140949	0.965326	0.334381	0.569471	1700.23	1575.74	1679.18	1792.63	1904.39	1748.13
b1643	ydhI	62.2215	0.813909	0.334894	2.43035	0.0150842	0.064971	57.9871	43.9332	33.7101	62.8059	86.6958	88.1969
b1644	ydhJ	95.7317	0.740308	0.283634	2.61009	0.0090519	0.0445648	87.5277	66.3879	61.0995	127.741	133.453	98.1814
b1645	ydhK	735.144	0.343851	0.319709	1.07551	0.282146	0.514473	631.293	661.926	651.026	745.154	547.45	1174.02
b1646	sodC	6510.18	0.553278	0.450382	1.22846	0.219274	0.444987	7414.69	4312.28	4104.2	6575.45	4166.27	12488.2
b1647	ydhF	2706.34	-0.0425415	0.200622	-0.212048	0.83207	0.92056	3266.97	2455.37	2516.67	2507.98	2900.9	2590.16
b1648	ydhL	455.354	0.415119	0.357261	1.16195	0.245257	0.475466	443.109	397.351	330.78	477.963	322.431	760.49
b1649	nemR	177.014	-0.42343	0.317811	-1.33233	0.182751	0.393005	249.454	199.164	160.123	156.482	107.152	189.706
b1650	nemA	1034.51	0.0908295	0.330982	0.274424	0.783759	0.896747	1357.77	827.896	820.63	1068.76	766.625	1365.39
b1651	gloA	1406.15	0.213666	0.137331	1.55584	0.119746	0.295111	1253.83	1334.59	1317.85	1540.34	1534.22	1456.08
b1652	rnt	120.756	-0.078404	0.274859	-0.285251	0.775452	0.89365	121.445	135.705	114.825	100.064	150.987	101.51
b1653	lhr	692.003	0.283327	0.202838	1.39681	0.16247	0.360418	748.362	551.605	573.071	790.928	738.376	749.673
b1654	grxD	1318.18	0.0605199	0.229908	0.263235	0.792369	0.899811	1213.35	1288.71	1369.47	1151.8	1695.93	1189.83
b1655	mepH	244.879	0.182132	0.219953	0.828047	0.407644	0.635948	243.983	236.263	208.581	227.804	246.45	306.193
b1656	sodB	57488.3	-0.392898	0.181637	-2.16309	0.0305344	0.111836	70657.8	64660.8	60486.4	54945.5	42966.1	51213.3
b1657	ydhP	57.0802	0.0990763	0.339814	0.29156	0.770623	0.891237	55.7989	62.4827	47.4048	41.5157	60.3948	74.8841
b1658	purR	265.198	-0.299727	0.211302	-1.41847	0.156052	0.350146	296.5	274.338	307.605	196.934	262.036	253.774
b1659	punR	133.527	-0.277315	0.334666	-0.828631	0.407313	0.635667	119.256	123.013	196.993	117.096	92.5405	152.264
b1660	punC	103.337	0.695069	0.251212	2.76686	0.00565989	0.0305663	95.1864	74.1982	67.4202	134.128	127.608	121.479
b1661	cfa	14454.4	0.565999	0.325006	1.7415	0.0815953	0.226541	15256.1	9810.76	9898.12	16201.8	12434.5	23125.1
b1662	ribC	729.887	0.312044	0.205141	1.52112	0.12823	0.308663	612.694	709.764	631.011	749.412	957.551	718.888
b1663	mdtK	508.821	0.193464	0.185577	1.0425	0.297181	0.532936	448.579	499.862	476.155	514.156	496.796	617.378
b1664	ydhQ	2948.29	0.346404	0.221046	1.56712	0.117088	0.291275	3196.95	2309.91	2281.75	3094.52	3158.07	3648.52
b1665	valV	1.20936	-0.545996	1.81257	-0.301227	0.763242	NA	2.18819	0	2.10688	2.12901	0	0.832046
b1666	valW	1.97811	-1.72634	1.65168	-1.0452	0.295929	NA	3.28229	5.85775	0	1.06451	0	1.66409
b1667	ydhR	2353.88	-0.467762	0.285585	-1.63791	0.101441	0.263984	3070.03	2477.83	2649.4	1641.47	1571.24	2713.3
b1668	ydhS	2212.77	0.636948	0.26415	2.41131	0.0158952	0.0677746	2182.72	1530.83	1483.24	2473.91	2307.67	3298.23
b1669	ydhT	86.3138	0.147745	0.269629	0.547957	0.583722	0.769527	66.7399	95.6766	83.2218	79.838	98.3852	94.0212
b1670	ydhU	39.7201	0.651207	0.364324	1.78744	0.0738666	0.212174	39.3875	30.2651	23.1757	40.4512	58.4466	46.5946
b1671	ydhX	74.3886	0.99903	0.406814	2.45574	0.0140595	0.0619438	44.8579	60.5301	43.1911	93.6765	144.168	59.9073
b1672	ydhW	46.6144	0.942887	0.480984	1.96033	0.0499573	0.160729	27.3524	30.2651	37.9238	60.6768	93.5146	29.9537
b1673	ydhV	223.638	3.15543	0.604707	5.21811	1.80754e-07	4.20502e-06	42.6697	25.3836	67.4202	344.9	720.842	140.616
b1674	ydhY	107.928	3.98097	0.597806	6.6593	2.75138e-11	1.37051e-09	14.2232	11.7155	12.6413	188.418	350.68	69.8919
b1675	fumD	272.962	0.512366	0.208877	2.45296	0.0141686	0.0623596	196.937	244.073	233.864	287.417	358.473	317.01
b1676	pykF	10729.7	0.72551	0.233757	3.1037	0.00191117	0.012947	9824.98	7227.49	7209.75	12511.1	11808.2	15796.4
b1677	lpp	537688	0.531321	0.184072	2.88648	0.00389578	0.0228143	449893	489759	379693	610491	600399	695895
b1678	ldtE	14720.7	0.0516733	0.265145	0.194887	0.845481	0.925646	15461.8	14075.2	13834.8	14649.7	10876.9	19425.8
b1679	sufE	2252.76	0.663	0.277262	2.39124	0.0167915	0.0706012	2340.27	1473.22	1418.98	2933.78	2346.63	3003.69
b1680	sufS	11801	0.689663	0.283059	2.43646	0.0148318	0.0643419	12050.4	7651.2	7397.26	15391.7	11837.4	16477.8
b1681	sufD	16025.4	0.77722	0.254253	3.05687	0.00223659	0.0147274	15106.2	10149.5	10175.2	21381.7	16965.1	22374.5
b1682	sufC	7073.14	0.851476	0.232684	3.65936	0.000252842	0.00246666	6337	4340.6	4456.05	9453.88	8099.73	9751.58
b1683	sufB	28739.2	0.973249	0.259417	3.75168	0.000175652	0.0017964	24695.9	16966	16529.5	38869.4	31378	43996.1
b1684	sufA	20391.3	0.660117	0.264048	2.49999	0.0124197	0.0568487	20015.4	14068.4	13334.4	26075.1	19958.5	28896.1
b1685	ydiH	452.37	0.762121	0.232007	3.28491	0.00102015	0.00782487	339.17	268.48	399.254	629.123	518.227	559.967
b1686	menI	75.3122	-0.220689	0.272173	-0.810838	0.417459	0.642514	72.2103	81.0323	89.5424	81.967	67.2136	59.9073
b1687	ydiJ	1329.89	-0.216778	0.150941	-1.43618	0.150952	0.3431	1470.47	1400	1417.93	1335.96	1194.26	1160.7
b1688	ydiK	771.404	0.111843	0.197954	0.564996	0.572077	0.762409	811.819	738.077	675.255	687.671	815.33	900.274
b1689	ydiL	15.0654	0.0905508	0.535705	0.169031	0.865772	0.932505	10.941	13.6681	18.9619	19.1611	18.5081	9.15251
b1690	ydiM	9.75858	1.33213	0.75666	1.76054	0.0783166	0.220914	6.56458	3.90517	6.32064	4.25802	17.534	19.9691
b1691	ydiN	3.71016	0.104015	1.09972	0.0945829	0.924646	NA	6.56458	0	4.21376	4.25802	3.89644	3.32818
b1692	ydiB	7.86811	-1.53301	1.12602	-1.36144	0.173376	0.377609	4.37638	13.6681	16.855	10.6451	0	1.66409
b1693	aroD	177.897	0.245283	0.240148	1.02138	0.307073	0.543419	163.02	189.401	135.894	173.514	219.175	186.378
b1694	ydiF	4.2509	0.555383	0.959439	0.578862	0.562682	0.756761	2.18819	3.90517	4.21376	2.12901	9.7411	3.32818
b1695	ydiO	8.5687	1.07457	0.832133	1.29135	0.196583	0.414096	2.18819	5.85775	8.42752	8.51605	21.4304	4.99228
b1696	ydiP	36.052	0.723296	0.374289	1.93246	0.0533033	0.168172	32.8229	19.5258	29.4963	46.8383	36.0421	51.5869
b1697	ydiQ	25.7387	0.200911	0.453052	0.443461	0.657432	0.822565	17.5055	20.5021	33.7101	27.6772	35.068	19.9691
b1698	ydiR	62.1357	0.305472	0.334097	0.914321	0.360548	0.593057	37.1993	68.3405	61.0995	59.6123	75.0065	71.556
b1699	ydiS	43.3979	-0.0414493	0.382978	-0.108229	0.913814	0.956039	39.3875	45.8857	46.3514	60.6768	38.9644	29.1216
b1700	ydiT	4.1431	0.250055	0.889743	0.281042	0.778678	0.895478	3.28229	5.85775	2.10688	6.38704	3.89644	3.32818
b1701	fadK	52.8206	-0.361988	0.348006	-1.04018	0.298257	0.534188	50.3284	56.6249	71.6339	31.9352	50.6537	55.7471
b1702	ppsA	10145.9	0.588986	0.26488	2.22359	0.0261759	0.100026	9251.68	7755.67	7302.45	12517.5	8884.86	15163.2
b1703	ppsR	1049.65	0.765663	0.325648	2.3512	0.0187129	0.0770724	1089.72	624.827	618.369	1170.96	1118.28	1675.74
b1704	aroH	206.1	0.701836	0.250888	2.79741	0.00515147	0.0284001	119.256	165.97	185.405	238.449	279.57	247.95
b1705	ydiE	31.6791	-0.0237571	0.39256	-0.0605184	0.951743	0.975473	29.5406	26.3599	40.0307	35.1287	22.4045	36.61
b1706	selO	1496.65	0.26837	0.189596	1.41548	0.156927	0.351364	1525.17	1353.14	1195.65	1592.5	1502.08	1811.36
b1707	rflP	190.781	1.57009	0.290158	5.41116	6.26167e-08	1.58754e-06	92.9982	103.487	91.6493	284.223	364.317	208.012
b1708	nlpC	519.869	0.388362	0.175267	2.21583	0.0267034	0.101583	466.085	436.403	448.766	526.931	647.783	593.249
b1709	btuD	418.322	0.116046	0.283036	0.410003	0.681803	0.835047	514.225	322.176	368.704	394.932	374.058	535.838
b1710	btuE	673.025	0.21378	0.283617	0.753764	0.450991	0.667889	827.137	557.463	485.636	608.897	728.635	830.382
b1711	btuC	192.483	-0.17983	0.210839	-0.852928	0.393699	0.621986	214.443	177.685	221.222	183.095	192.874	165.577
b1712	ihfA	12876.2	0.39068	0.41547	0.940334	0.347046	0.581477	16213.4	8761.25	8455.96	12677.2	9267.69	21882
b1713	pheT	2653.75	-0.127624	0.149255	-0.855075	0.392509	0.621986	2653.18	2784.39	2875.89	2329.14	2673.93	2605.97
b1714	pheS	723.415	-0.214247	0.278626	-0.76894	0.441929	0.66141	670.681	869.876	790.08	649.349	867.932	492.571
b1715	pheM	14.8338	-0.382004	0.55509	-0.688185	0.491336	0.701152	14.2232	10.7392	25.2826	15.9676	13.6375	9.15251
b1716	rplT	6813.23	-0.0614057	0.251256	-0.244395	0.806925	0.907684	5526.28	8409.78	6937.96	7020.42	7548.38	5436.59
b1717	rpmI	3819.33	0.0341307	0.279689	0.122031	0.902875	0.950938	2787.76	3954.96	4579.3	4126.03	4440.97	3026.98
b1718	infC	8483.5	-0.0877982	0.21148	-0.415161	0.678024	0.833099	7165.24	9718.01	9340.85	8565.02	8929.67	7182.22
b1719	thrS	17398.9	-0.303746	0.21537	-1.41035	0.158437	0.35381	15634.6	21070.3	20965.6	16885.2	16353.4	13484.1
b1722	ydiY	22.9797	0.300979	0.581953	0.517187	0.605026	0.783388	8.75277	23.431	29.4963	18.0966	38.9644	19.1371
b1723	pfkB	4085.24	0.405239	0.154905	2.61606	0.00889522	0.0438955	3867.63	3406.28	3271.99	4791.34	4439.02	4735.17
b1724	ydiZ	871.387	0.0914783	0.191038	0.47885	0.632046	0.803869	919.041	759.555	853.287	886.734	798.771	1010.94
b1725	yniA	9136.16	-0.276172	0.157093	-1.75802	0.0787435	0.221823	10049.3	10585.9	9388.26	8997.21	7615.6	8180.68
b1726	yniB	790.507	0.229724	0.282678	0.812671	0.416407	0.641815	886.218	630.685	666.828	746.219	696.489	1116.61
b1727	hxpB	220.809	0.226177	0.28536	0.792601	0.42801	0.652867	175.055	224.547	210.688	217.159	312.689	184.714
b1728	ydjM	84.669	-0.317365	0.334629	-0.948408	0.342922	0.577952	84.2454	92.7478	105.344	59.6123	60.3948	105.67
b1729	tcyP	1201.64	0.41313	0.625152	0.660848	0.50871	0.713441	2071.12	497.909	523.56	631.252	1641.38	1844.65
b1730	ydjO	6.37625	0.69912	0.702422	0.995299	0.319591	0.554115	4.37638	3.90517	6.32064	8.51605	6.81877	8.32046
b1731	cedA	18.387	-0.317101	0.55189	-0.574572	0.56558	0.758767	8.75277	31.2414	21.0688	17.0321	15.5858	16.6409
b1732	katE	5066.15	1.45354	0.138704	10.4794	1.07422e-25	2.5268e-23	2804.17	2547.15	2778.98	7638.9	7510.39	7117.32
b1733	chbG	109.365	-0.187687	0.289439	-0.648452	0.516693	0.720105	84.2454	136.681	128.52	93.6765	97.411	115.654
b1734	chbF	48.3784	-0.487984	0.352066	-1.38606	0.165729	0.365277	55.7989	55.6487	57.9392	31.9352	56.4984	32.4498
b1735	chbR	41.6926	0.307767	0.351994	0.874353	0.381926	0.611547	35.0111	30.2651	46.3514	56.4188	43.835	38.2741
b1736	chbA	23.6717	0.546253	0.488193	1.11893	0.263171	0.492992	8.75277	21.4784	27.3894	26.6127	31.1715	26.6255
b1737	chbC	88.5535	0.331358	0.276717	1.19746	0.231126	0.457712	66.7399	81.0323	87.4355	110.709	78.9029	106.502
b1738	chbB	347.021	0.668652	0.228531	2.92587	0.00343499	0.0207768	222.102	294.84	286.536	469.447	448.091	361.108
b1739	osmE	14482.6	-0.0827679	0.143181	-0.578065	0.56322	0.75704	14609.5	14470.6	15614.1	13581	13477.8	15142.4
b1740	nadE	1694.27	0.466505	0.252662	1.84636	0.0648401	0.193606	1253.83	1494.7	1519.06	2115.17	2335.92	1446.93
b1741	cho	191.718	-0.303542	0.22576	-1.34453	0.178775	0.387179	175.055	212.832	247.558	169.256	167.547	178.058
b1742	ves	40.4526	-0.291964	0.361511	-0.807621	0.419309	0.643261	48.1402	35.1465	50.5651	26.6127	44.8091	37.4421
b1743	spy	694.353	0.780781	0.315109	2.47781	0.0132192	0.059123	575.495	451.047	506.705	762.186	629.275	1241.41
b1744	astE	1123.92	-0.944989	1.35116	-0.69939	0.484309	0.696638	2931.08	896.236	610.995	453.48	37.0162	1814.69
b1745	astB	4940.09	-1.10833	1.32135	-0.838785	0.40159	0.629986	12651	4327.9	3269.88	2001.27	144.168	7246.29
b1746	astD	4790.55	-1.44192	1.25526	-1.1487	0.250678	0.480693	11298.7	5588.3	4123.17	1673.4	130.531	5929.16
b1747	astA	5365.69	-2.1167	1.10337	-1.91839	0.0550615	0.172179	12220	8079.79	5862.39	1374.28	182.159	4475.58
b1748	astC	6386.96	-2.60323	0.716063	-3.63548	0.000277461	0.00266994	13511	11373.8	8021.95	1559.5	261.062	3594.44
b1749	xthA	302.204	-0.4086	0.217222	-1.88103	0.0599684	0.183857	334.793	398.327	301.284	234.191	254.243	290.384
b1750	ydjX	57.8769	1.2413	0.357351	3.47361	0.000513504	0.00446443	28.4465	25.3836	49.5117	73.4509	90.5923	79.8764
b1751	ydjY	62.4682	1.70296	0.523257	3.25454	0.00113574	0.00845121	29.5406	18.5496	40.0307	74.5154	159.754	52.4189
b1752	ydjZ	123.992	0.409048	0.281013	1.45562	0.145497	0.334438	130.197	90.7952	99.0234	111.773	160.728	151.432
b1753	ynjA	71.3544	0.148721	0.304432	0.48852	0.625181	0.798635	77.6808	66.3879	58.9927	63.8704	95.4628	65.7316
b1754	ynjB	122.3	0.290473	0.285907	1.01597	0.309645	0.545583	126.915	122.037	81.1149	120.289	157.806	125.639
b1755	ynjC	63.824	0.491962	0.381461	1.28968	0.197163	0.414942	67.834	56.6249	34.7635	56.4188	97.411	69.8919
b1756	ynjD	50.6653	0.260132	0.358914	0.724776	0.46859	0.682963	52.5166	43.9332	42.1376	36.1932	70.1359	59.0753
b1757	ynjE	400.849	1.06967	0.372791	2.86935	0.00411313	0.0235337	199.125	273.362	303.391	475.834	805.589	347.795
b1758	ynjF	81.2205	0.255036	0.254064	1.00383	0.315462	0.55011	80.9631	76.1508	65.3133	81.967	84.7476	98.1814
b1759	nudG	33.8696	-0.514003	0.366325	-1.40314	0.160576	0.357306	37.1993	36.1228	46.3514	29.8062	20.4563	33.2818
b1760	ynjH	51.6131	0.126136	0.402273	0.313558	0.753857	0.881097	38.2934	60.5301	49.5117	38.3222	44.8091	78.2123
b1761	gdhA	1334.37	-0.168998	0.240789	-0.701854	0.48277	0.695859	1776.81	1293.59	1167.21	1295.5	1108.54	1364.56
b1762	ynjI	26.1446	-0.33741	0.46578	-0.724398	0.468822	0.683066	17.5055	37.0991	32.6566	25.5481	28.2492	15.8089
b1763	topB	2349.81	-0.595824	0.144908	-4.11173	3.92703e-05	0.000469691	2831.52	2946.45	2706.29	2001.27	1801.13	1812.2
b1764	selD	4889.66	-0.861332	0.185824	-4.6352	3.56591e-06	5.76262e-05	6230.88	6539.21	6152.09	3873.74	2901.87	3640.2
b1765	ydjA	3044.84	-1.13979	0.2818	-4.04466	5.23985e-05	0.000611171	3713.36	4392.34	4460.27	2393.01	1296.54	2013.55
b1766	sppA	804.544	-0.291307	0.162857	-1.78873	0.0736584	0.212156	852.301	940.169	863.821	767.509	660.447	743.017
b1767	ansA	198.86	0.299746	0.246482	1.2161	0.223948	0.450781	206.784	166.946	161.176	196.934	264.958	196.363
b1768	pncA	174.237	-0.195567	0.193059	-1.01299	0.311064	0.546265	187.09	198.187	172.764	159.676	164.625	163.081
b1769	ydjE	20.4461	-0.380765	0.493376	-0.771753	0.440261	0.661216	24.0701	27.3362	17.9085	12.7741	27.2751	13.3127
b1770	ydjF	148.082	-0.182845	0.349442	-0.523248	0.600801	0.77876	90.81	187.448	193.833	141.579	150.013	124.807
b1771	ydjG	35.0515	0.500477	0.533624	0.937883	0.348304	0.582313	29.5406	19.5258	37.9238	43.6448	61.369	18.305
b1772	ydjH	12.3232	1.06129	0.872388	1.21653	0.223784	0.450761	4.37638	6.83405	12.6413	21.2901	26.301	2.49614
b1773	ydjI	14.7635	0.258157	0.639648	0.403593	0.686512	0.838147	7.65867	14.6444	17.9085	12.7741	27.2751	8.32046
b1774	ydjJ	15.8812	1.02425	0.645028	1.58792	0.112304	0.282603	8.75277	7.81034	14.7482	24.4836	31.1715	8.32046
b1775	ydjK	18.0956	0.652104	0.556327	1.17216	0.241133	0.469621	21.8819	9.76292	10.5344	31.9352	19.4822	14.9768
b1776	ydjL	31.9362	0.511051	0.394962	1.29392	0.195692	0.413084	24.0701	27.3362	27.3894	38.3222	48.7055	25.7934
b1777	yeaC	1211.44	-1.57837	0.358448	-4.40335	1.06592e-05	0.000151446	1448.58	2065.83	1930.96	706.832	340.939	775.467
b1778	msrB	3392.89	-1.34614	0.373139	-3.60761	0.000309031	0.00293024	3944.22	5477.98	5188.19	2470.72	1013.07	2263.17
b1779	gapA	65145	0.38023	0.490159	0.775729	0.437909	0.659825	33316.3	65451.6	71060.9	76643.4	112388	32009.6
b1780	yeaD	1206.52	0.772299	0.520565	1.48358	0.13792	0.323163	473.744	1070.99	1128.23	1526.5	2397.29	642.34
b1781	yeaE	535.307	-0.0784391	0.160615	-0.488368	0.625289	0.798635	556.895	548.676	543.575	565.253	506.537	490.907
b1782	mipA	991.852	0.309569	0.403728	0.766777	0.443214	0.661696	545.954	1037.8	1073.46	1044.28	1567.34	682.278
b1783	yeaG	42224.1	0.536872	0.339637	1.58072	0.113941	0.285123	44950.9	30208.4	28212.2	50823.8	32821.7	66327.4
b1784	yeaH	7722.25	0.808492	0.336475	2.40283	0.0162686	0.0688125	7385.15	4696.94	4758.39	10051.1	6557.71	12884.2
b1785	cdgI	34.1625	2.48959	0.42689	5.83192	5.47936e-09	1.85597e-07	9.84687	12.6918	8.42752	47.9028	54.5502	71.556
b1786	dgcJ	53.1959	0.378338	0.429831	0.880201	0.37875	0.609154	21.8819	54.6724	62.153	53.2253	62.3431	64.8996
b1787	yeaK	467.009	-0.414829	0.225344	-1.84087	0.0656409	0.195171	561.271	554.534	484.583	464.125	418.867	318.674
b1788	yoaI	13.0993	0.0405819	1.03103	0.0393607	0.968603	0.984177	13.1292	10.7392	14.7482	23.4191	16.5599	0
b1789	yeaL	52.4414	-0.0333193	0.288123	-0.115643	0.907936	0.953529	53.6107	50.7672	54.7789	46.8383	60.3948	48.2587
b1790	nimR	144.949	-0.113502	0.301721	-0.376181	0.706782	0.853298	150.985	172.804	128.52	124.547	108.126	184.714
b1791	nimT	69.2762	-0.403151	0.312076	-1.29184	0.196414	0.413945	94.0923	86.89	55.8323	55.3543	59.4207	64.0675
b1792	yeaO	1125.07	0.26468	0.199257	1.32833	0.184069	0.394806	1091.91	1028.04	947.043	1156.05	1081.26	1446.1
b1793	yoaF	96.8891	-0.0733193	0.308174	-0.237915	0.811947	0.910189	73.3044	117.155	107.451	105.386	74.0324	104.006
b1794	dgcP	326.5	-0.917033	0.200593	-4.57161	4.83982e-06	7.37115e-05	461.709	362.204	457.193	215.03	229.89	232.973
b1795	yeaQ	2450.95	1.32866	0.275014	4.83123	1.35691e-06	2.46573e-05	1022.98	1531.8	1632.83	3162.65	3064.55	4290.86
b1796	yoaG	24.4467	-0.603635	0.758702	-0.795616	0.426255	0.65107	4.37638	56.6249	27.3894	17.0321	20.4563	20.8012
b1797	yeaR	37.1578	-0.709246	0.77139	-0.919438	0.357866	0.590493	6.56458	66.3879	65.3133	18.0966	45.7832	20.8012
b1798	leuE	24.8725	-0.0904105	0.422335	-0.214073	0.83049	0.920255	19.6937	25.3836	31.6032	30.8707	23.3786	18.305
b1799	dmlR	537.348	-0.144812	0.157622	-0.918728	0.358238	0.590876	576.589	592.609	523.56	507.769	520.175	503.388
b1800	dmlA	421.868	1.04351	0.456637	2.2852	0.022301	0.088824	461.709	173.78	191.726	562.059	384.774	757.162
b1801	yeaV	26.0592	-0.101031	0.362011	-0.279084	0.78018	0.896414	26.2583	27.3362	27.3894	23.4191	25.3269	26.6255
b1802	yeaW	38.6109	0.654963	0.380611	1.72082	0.0852833	0.233812	21.8819	36.1228	31.6032	58.5478	47.7314	35.778
b1803	yeaX	33.6913	-0.392665	0.381378	-1.0296	0.303199	0.539976	36.1052	46.862	31.6032	36.1932	21.4304	29.9537
b1804	rnd	349.016	-0.180064	0.201648	-0.892963	0.371877	0.604193	346.828	404.185	361.33	285.288	371.136	325.33
b1805	fadD	5737.23	-3.63027	0.472962	-7.67562	1.64625e-14	1.31513e-12	8907.04	12643	10301.6	910.153	331.198	1330.44
b1806	yeaY	712.75	-0.372574	0.378005	-0.985631	0.324314	0.559099	1288.85	544.771	579.392	616.349	649.732	597.409
b1807	tsaB	102.03	-0.590043	0.262145	-2.25083	0.0243964	0.0947656	119.256	120.084	128.52	68.1284	101.307	74.8841
b1808	yoaA	453.505	-0.531027	0.179805	-2.95335	0.00314349	0.0193734	554.707	537.937	515.132	416.222	335.094	361.94
b1809	yoaB	942.484	-0.408884	0.426758	-0.958118	0.338003	0.57313	698.033	1268.2	1258.86	790.928	1202.05	436.824
b1810	yoaC	569.777	1.1996	0.354371	3.38516	0.000711374	0.00583713	498.908	263.599	274.948	663.187	672.136	1045.88
b1811	yoaH	58.2174	-0.596923	0.35378	-1.68727	0.091551	0.245898	79.869	64.4353	66.3667	28.7417	57.4725	52.4189
b1812	pabB	187.958	-0.237117	0.245105	-0.96741	0.333339	0.568866	166.303	235.286	208.581	169.256	151.961	196.363
b1813	nudL	354.329	-0.0467546	0.178105	-0.262511	0.792927	0.900059	373.087	361.228	345.528	386.416	330.223	329.49
b1814	sdaA	3537.51	0.361624	0.144889	2.49587	0.0125649	0.0570815	2927.8	3186.62	3175.07	3959.96	3751.3	4224.3
b1815	pdeD	257.539	0.732209	0.386258	1.89565	0.0580068	0.179271	243.983	173.78	163.283	286.352	197.744	480.091
b1816	yoaE	734.831	-1.90545	0.30326	-6.2832	3.31668e-10	1.40428e-08	1271.34	1155.93	1053.44	296.997	209.434	421.847
b1817	manX	8411.89	0.0161042	0.414288	0.038872	0.968992	0.984336	7468.3	8717.31	8908.94	7582.48	13516.8	4277.55
b1818	manY	7660.58	0.12976	0.407742	0.31824	0.750303	0.880401	7328.26	7482.3	7138.11	7253.54	12703.4	4057.89
b1819	manZ	7953.37	-0.116196	0.392527	-0.29602	0.767215	0.888751	7637.89	9017.04	8165.22	7182.22	11710.8	4007.13
b1820	yobD	61.2256	0.42945	0.622316	0.690084	0.490141	0.699683	28.4465	75.1745	52.672	65.9994	121.764	23.2973
b1821	mntP	17.3175	0.145421	0.539396	0.2696	0.787468	0.89748	18.5996	12.6918	17.9085	20.2256	25.3269	9.15251
b1822	rlmA	178.646	-0.0433966	0.278927	-0.155584	0.876361	0.937945	178.338	164.017	202.261	131.999	171.443	223.82
b1823	cspC	19644.8	0.314417	0.263716	1.19226	0.233159	0.460446	14328.3	18535.9	19673	22198.1	26672.1	16461.2
b1824	yobF	9319.66	0.440425	0.177476	2.4816	0.0130794	0.0588128	7636.79	7838.65	8248.44	10477.9	12287.4	9428.75
b1825	yebO	588.6	-0.152469	0.218651	-0.697316	0.485605	0.696638	516.413	698.049	644.705	479.028	589.337	604.065
b1826	mgrB	436.862	-1.96262	0.273264	-7.18216	6.86162e-13	4.27237e-11	632.388	780.057	674.202	167.127	134.427	232.973
b1827	kdgR	1236.12	0.00364698	0.199765	0.0182564	0.985434	0.994122	1022.98	1404.88	1275.72	1214.6	1174.78	1323.79
b1828	yebQ	35.2307	-0.4799	0.435571	-1.10177	0.270561	0.502658	30.6347	29.2888	63.2064	27.6772	33.1198	27.4575
b1829	htpX	2164.81	-0.578576	0.2902	-1.99371	0.0461832	0.1528	3310.73	2445.61	2023.66	1651.05	1386.16	2171.64
b1830	prc	1236.39	0.540826	0.183607	2.94556	0.00322373	0.0197244	1076.59	1017.3	928.081	1358.31	1673.52	1364.56
b1831	proQ	880.473	0.439883	0.218546	2.01277	0.0441389	0.148086	694.751	807.394	739.515	880.347	1238.09	922.739
b1832	msrC	527.775	0.471275	0.204058	2.30951	0.0209151	0.0844984	365.428	470.573	490.903	567.382	645.835	626.531
b1833	letA	1026.93	0.0536678	0.160906	0.333536	0.738729	0.87222	978.122	1015.34	1030.26	1057.05	945.861	1134.91
b1834	letB	1283.01	0.239178	0.141273	1.69302	0.0904512	0.244086	1241.8	1159.84	1129.29	1389.18	1355.96	1421.97
b1835	rsmF	118.799	-0.18854	0.248167	-0.759729	0.447417	0.665155	111.598	136.681	131.68	100.064	101.307	131.463
b1836	yebV	4726.37	0.0385178	0.282483	0.136354	0.891541	0.945119	5572.23	4530.97	3887.19	4259.09	3800.98	6307.74
b1837	yebW	150.21	-0.192948	0.301664	-0.639613	0.522424	0.724653	157.55	171.827	151.695	136.257	98.3852	185.546
b1838	pphA	181.727	0.0722711	0.265991	0.271705	0.785849	0.896747	158.644	185.496	187.512	199.063	138.324	221.324
b1839	yebY	294.998	0.167707	0.240741	0.696631	0.486034	0.696638	223.196	293.864	316.032	354.481	313.664	268.751
b1840	yebZ	821.93	-0.342623	0.159131	-2.15309	0.0313119	0.113587	908.1	919.667	929.134	791.993	666.292	716.392
b1841	yobA	1044.98	0.0156416	0.229043	0.0682911	0.945554	0.973135	1227.58	1073.92	816.416	1143.28	953.654	1055.03
b1842	holE	282.426	1.57529	0.252214	6.24582	4.21573e-10	1.76727e-08	160.832	153.278	111.665	461.996	351.654	455.129
b1843	yobB	427.121	-1.37114	0.424798	-3.22773	0.00124776	0.00918783	871.995	476.431	500.384	199.063	147.091	367.764
b1844	exoX	377.864	-0.217654	0.212457	-1.02446	0.305617	0.542439	451.862	377.825	389.773	345.964	299.052	402.71
b1845	ptrB	1705.35	0.592589	0.25345	2.33809	0.0193824	0.0793665	1725.39	1180.34	1174.59	2081.11	1730.99	2339.71
b1846	yebE	481.026	0.348416	0.274644	1.26861	0.204581	0.425774	556.895	388.564	324.46	481.157	605.897	529.181
b1847	yebF	1428.07	0.0187629	0.214741	0.0873749	0.930374	0.964781	1225.39	1514.23	1516.95	1403.02	1226.41	1682.4
b1848	yebG	1971.04	-0.068396	0.175045	-0.390734	0.695994	0.845335	1965	2157.61	1930.96	1892.69	1718.33	2161.66
b1849	purT	47.4756	0.310658	0.374776	0.828916	0.407152	0.63565	26.2583	44.9094	55.8323	50.0318	60.3948	47.4266
b1850	eda	1331.46	0.150895	0.352945	0.427531	0.668993	0.827737	897.159	1458.58	1429.52	1455.18	1860.55	887.793
b1851	edd	415.802	-0.153266	0.341402	-0.448932	0.65348	0.819075	358.864	494.004	460.353	372.577	555.243	253.774
b1852	zwf	3528.49	0.418271	0.2245	1.86312	0.0624456	0.188853	2934.37	3011.86	3115.02	4058.96	4893.93	3156.78
b1853	yebK	774.275	-0.171709	0.167031	-1.02801	0.303947	0.540152	809.631	837.659	813.256	714.284	808.512	662.309
b1854	pykA	6586.17	0.629281	0.306297	2.05448	0.0399292	0.137336	4633.5	5339.34	5543.2	7879.47	10849.6	5271.84
b1855	lpxM	388.54	0.0830314	0.189701	0.437697	0.661606	0.825227	411.38	395.398	325.513	382.158	397.437	419.351
b1856	mepM	489.27	0.187194	0.178386	1.04938	0.294005	0.528433	468.273	451.047	452.979	548.221	559.139	455.961
b1857	znuA	242.944	-0.0710589	0.178696	-0.397652	0.690887	0.841063	262.583	243.097	241.238	226.74	249.372	234.637
b1858	znuC	238.968	-0.26361	0.277593	-0.94963	0.342301	0.577641	191.467	307.532	283.375	189.482	206.511	255.438
b1859	znuB	88.3151	-0.231197	0.31278	-0.739167	0.459806	0.675978	109.41	112.274	64.2599	88.354	79.8771	75.7162
b1860	ruvB	707.066	-0.0985856	0.179505	-0.549208	0.582862	0.769277	631.293	785.915	776.385	666.381	670.188	712.231
b1861	ruvA	552.871	-0.575621	0.166973	-3.4474	0.000566015	0.00482194	618.164	674.618	692.11	435.383	479.262	417.687
b1862	yebB	8.22119	-0.149886	0.72784	-0.205932	0.836844	0.922682	5.47048	9.76292	10.5344	13.8386	3.89644	5.82432
b1863	ruvC	317.607	-0.230395	0.249792	-0.922346	0.356348	0.589242	274.618	368.062	385.559	306.578	331.198	239.629
b1864	yebC	924.737	-0.426094	0.193536	-2.20162	0.0276921	0.104406	910.288	1187.17	1082.94	802.638	846.502	718.888
b1865	nudB	367.876	-0.217841	0.174994	-1.24485	0.213187	0.436687	420.133	388.564	378.185	357.674	310.741	351.955
b1866	aspS	2900.42	-0.349353	0.148699	-2.34939	0.0188042	0.0772982	3484.7	3133.9	3130.82	2622.94	2638.87	2391.3
b1867	yecD	188.289	-0.0834645	0.258645	-0.322699	0.746923	0.878221	157.55	216.737	206.474	183.095	215.278	150.6
b1868	yecE	158.381	0.216493	0.279766	0.773834	0.439029	0.660103	171.773	112.274	155.909	175.644	138.324	196.363
b1869	yecN	252.443	-0.0197805	0.231644	-0.085392	0.93195	0.965371	230.854	313.39	218.062	252.288	239.631	260.43
b1870	cmoA	162.289	0.0283928	0.224599	0.126416	0.899403	0.948789	161.926	162.065	158.016	147.966	194.822	148.936
b1871	cmoB	260.368	0.256356	0.189308	1.35417	0.175681	0.381648	241.795	225.524	244.398	285.288	309.767	255.438
b1872	torZ	205.709	-0.433551	0.27029	-1.60402	0.10871	0.27578	211.161	245.049	252.826	209.708	126.634	188.874
b1873	torY	18.7989	0.497291	0.437183	1.13749	0.255334	0.486685	16.4114	17.5733	12.6413	24.4836	23.3786	18.305
b1874	cutC	693.93	-0.375569	0.2389	-1.57208	0.115932	0.289052	955.146	781.034	615.209	633.381	540.631	638.179
b1875	yecM	94.1802	-0.114902	0.264672	-0.43413	0.664194	0.826145	84.2454	110.321	99.0234	81.967	107.152	82.3726
b1876	argS	558.551	0.13049	0.18853	0.692145	0.488846	0.698607	513.131	587.728	499.331	517.35	592.259	641.507
b1877	yecT	5.1827	1.70081	0.934743	1.81955	0.0688275	0.202147	1.0941	0.976292	5.2672	6.38704	10.7152	6.65637
b1878	flhE	5.68083	-1.33899	1.16042	-1.15389	0.248544	0.479424	0	11.7155	12.6413	3.19352	4.87055	1.66409
b1879	flhA	108.265	-0.362621	0.223099	-1.62539	0.10408	0.268114	120.351	121.06	124.306	89.4185	89.6182	104.838
b1880	flhB	16.8014	0.915299	0.718108	1.2746	0.202451	0.423508	10.941	1.95258	22.1222	23.4191	22.4045	19.9691
b1881	cheZ	42.2327	0.639781	0.331853	1.9279	0.0538671	0.169445	37.1993	27.3362	34.7635	52.1608	42.8609	59.0753
b1882	cheY	11.7333	1.56135	0.710917	2.19625	0.0280742	0.10514	10.941	4.88146	2.10688	10.6451	24.3528	17.473
b1883	cheB	7.62506	0.325922	0.837199	0.389301	0.697054	0.845895	2.18819	11.7155	6.32064	4.25802	14.6117	6.65637
b1884	cheR	20.9019	-0.234608	0.567749	-0.413224	0.679442	0.833756	17.5055	31.2414	18.9619	26.6127	7.79288	23.2973
b1885	tap	19.6646	-0.039248	0.676729	-0.0579967	0.953751	0.977059	15.3173	36.1228	8.42752	13.8386	12.6634	31.6177
b1886	tar	36.3409	0.147789	0.436908	0.338261	0.735166	0.869225	30.6347	42.9569	29.4963	43.6448	49.6796	21.6332
b1887	cheW	17.0681	-0.110484	0.471737	-0.234207	0.814824	0.912024	21.8819	16.597	14.7482	12.7741	21.4304	14.9768
b1888	cheA	47.0656	0.149183	0.401572	0.371498	0.710267	0.85493	26.2583	54.6724	52.672	51.0963	59.4207	38.2741
b1889	motB	16.7402	-0.72514	0.573272	-1.26491	0.205902	0.42672	26.2583	19.5258	16.855	6.38704	21.4304	9.98455
b1890	motA	13.2762	-0.0817414	0.739787	-0.110493	0.912018	0.955442	8.75277	19.5258	12.6413	4.25802	25.3269	9.15251
b1891	flhC	58.7365	0.578872	0.359668	1.60946	0.107515	0.27357	48.1402	36.1228	56.8858	92.612	66.2395	52.4189
b1892	flhD	55.2636	1.11927	0.384992	2.90727	0.00364602	0.0218199	42.6697	28.3125	33.7101	54.2898	105.204	67.3957
b1893	insB5	1.49789	-0.455984	1.46492	-0.31127	0.755596	NA	2.18819	1.95258	1.05344	2.12901	0	1.66409
b1894	insA5	0.679539	2.81515	2.84979	0.987843	0.323229	NA	0	0	0	2.12901	1.94822	0
b1895	uspC	708.187	-0.633928	0.162616	-3.89832	9.68614e-05	0.0010462	799.784	929.43	854.34	555.672	581.544	528.349
b1896	otsA	5556.64	0.107002	0.284431	0.376198	0.70677	0.853298	6788.87	4709.63	4554.02	5565.24	4485.78	7236.3
b1897	otsB	4150.59	0.243908	0.295523	0.825342	0.409178	0.636933	4691.48	3595.68	3115.02	4131.35	3436.66	5933.32
b1900	araG	273.33	0.2664	0.231122	1.15264	0.249059	0.479459	282.277	216.737	245.452	295.933	345.809	253.774
b1901	araF	625.545	0.130067	0.215554	0.603408	0.546237	0.741748	707.88	512.553	572.018	686.606	578.622	695.59
b1902	ftnB	954.128	0.834168	0.222148	3.755	0.000173338	0.00177703	801.972	633.614	621.53	1280.6	1368.63	1018.42
b1904	yecR	13.1412	0.621295	0.53638	1.15831	0.246737	0.477025	10.941	13.6681	6.32064	19.1611	14.6117	14.1448
b1905	ftnA	2246.57	1.36043	0.698523	1.94758	0.051465	0.164153	362.146	1617.72	1798.22	3179.68	5597.24	924.403
b1906	yecH	353.912	0.504283	0.268149	1.88061	0.0600249	0.183897	269.148	248.955	360.277	323.61	476.34	445.145
b1907	tyrP	58.4835	-0.564631	0.331062	-1.70551	0.0880991	0.239417	89.7159	60.5301	58.9927	57.4833	40.9126	43.2664
b1908	yecA	1202.65	-0.502504	0.152619	-3.29253	0.000992895	0.00764349	1330.42	1423.43	1475.87	982.539	1061.78	941.876
b1909	leuZ	0.325067	-0.127726	3.60911	-0.03539	0.971769	NA	0	0.976292	0	0	0.97411	0
b1910	cysT	31.355	-0.0704867	0.536906	-0.131283	0.895551	0.947231	13.1292	40.028	43.1911	20.2256	39.9385	31.6177
b1911	glyW	772.675	-0.6137	0.300714	-2.04081	0.0412699	0.141031	656.458	1014.37	1132.45	652.542	710.126	470.106
b1912	pgsA	603.657	-0.312957	0.176661	-1.77151	0.0764754	0.217459	679.434	700.002	626.797	535.447	595.181	485.083
b1913	uvrC	1143.92	0.91166	0.215358	4.23324	2.30353e-05	0.000298261	836.984	806.417	738.462	1532.89	1745.61	1203.14
b1914	uvrY	375.841	0.83988	0.333466	2.51864	0.011781	0.0545144	173.961	320.224	313.925	382.158	608.819	455.961
b1915	yecF	11.7816	1.05087	0.728931	1.44165	0.1494	0.340635	8.75277	4.88146	9.48096	5.32253	27.2751	14.9768
b1916	sdiA	135.417	0.246261	0.303471	0.811482	0.417089	0.642399	126.915	153.278	91.6493	121.354	141.246	178.058
b1917	tcyN	975.838	-0.170242	0.170868	-0.996337	0.319087	0.553694	1141.14	999.723	959.684	890.992	870.855	992.631
b1918	tcyL	882.725	-0.225064	0.218628	-1.02944	0.303274	0.539976	1169.59	820.085	864.874	854.798	760.78	826.222
b1919	dcyD	2491.84	-0.523385	0.18004	-2.90704	0.00364867	0.0218199	3198.04	2807.82	2811.63	1992.76	1829.38	2311.42
b1920	tcyJ	4967.97	-0.283349	0.650065	-0.435878	0.662925	0.826023	11732	2290.38	2340.74	2715.56	4312.39	6416.74
b1921	fliZ	54.1911	0.292618	0.329825	0.887192	0.374976	0.606939	62.3635	45.8857	37.9238	56.4188	70.1359	52.4189
b1922	fliA	57.5242	0.574286	0.328792	1.74665	0.0806974	0.225273	54.7048	45.8857	37.9238	72.3864	81.8253	52.4189
b1923	fliC	795.684	0.123821	0.224565	0.55138	0.581373	0.768989	685.998	813.251	785.866	733.445	735.453	1020.09
b1924	fliD	27.6448	0.889962	0.415985	2.13941	0.0324027	0.116265	15.3173	16.597	26.336	35.1287	29.2233	43.2664
b1925	fliS	2.46763	0.862302	1.12448	0.766845	0.443174	NA	2.18819	0.976292	2.10688	4.25802	1.94822	3.32818
b1926	fliT	3.0896	0.318938	1.53424	0.20788	0.835322	NA	3.28229	4.88146	0	7.45154	2.92233	0
b1927	amyA	3106.59	0.73956	0.333698	2.21626	0.0266739	0.101583	3265.88	1905.72	1810.86	3398.97	3200.93	5057.18
b1928	yedD	484.767	-0.727719	0.213612	-3.40674	0.000657441	0.00544737	603.941	641.424	568.858	315.094	339.965	439.32
b1929	yedE	200.682	0.302073	0.381524	0.791753	0.428504	0.652867	143.327	176.709	219.116	162.869	338.99	163.081
b1930	yedF	97.2599	0.678557	0.470677	1.44166	0.149398	0.340635	47.0461	78.1034	99.0234	114.967	181.185	63.2355
b1931	yedK	137.157	0.138689	0.386689	0.358657	0.719852	0.859834	129.103	138.633	124.306	130.934	82.7994	217.164
b1932	yedL	60.9086	-1.17279	0.540611	-2.16937	0.0300543	0.11046	27.3524	103.487	122.199	40.4512	37.0162	34.9459
b1936	intG	1.1691	-0.683879	2.22865	-0.306858	0.758951	NA	4.37638	0	0	0	0.97411	1.66409
b1937	fliE	6.77333	0.00510313	1.10462	0.00461979	0.996314	0.9982	7.65867	0	12.6413	5.32253	11.6893	3.32818
b1938	fliF	27.4301	0.625005	0.598977	1.04345	0.296739	0.532595	15.3173	30.2651	18.9619	26.6127	58.4466	14.9768
b1939	fliG	69.2116	0.655378	0.328217	1.99678	0.0458491	0.151898	54.7048	36.1228	70.5805	87.2895	86.6958	79.8764
b1940	fliH	27.6181	1.0807	0.472249	2.28842	0.0221131	0.0883272	19.6937	16.597	16.855	31.9352	56.4984	24.1293
b1941	fliI	35.9034	0.926886	0.575488	1.61061	0.107265	0.273261	15.3173	30.2651	28.4429	50.0318	73.0583	18.305
b1942	fliJ	4.14278	1.2615	1.21977	1.03421	0.301037	0.537802	0	0.976292	6.32064	5.32253	9.7411	2.49614
b1943	fliK	30.3436	0.839603	0.461469	1.81941	0.0688486	0.202147	18.5996	26.3599	20.0154	45.7738	49.6796	21.6332
b1944	fliL	31.4525	0.413731	0.662074	0.624901	0.532036	0.731382	21.8819	27.3362	31.6032	22.3546	73.0583	12.4807
b1945	fliM	60.2399	0.454298	0.460411	0.986723	0.323778	0.558402	44.8579	52.7198	54.7789	53.2253	115.919	39.9382
b1946	fliN	7.10521	0.748354	0.959702	0.779778	0.435521	0.6581	6.56458	1.95258	7.37408	8.51605	16.5599	1.66409
b1947	fliO	6.49016	1.11351	0.754257	1.4763	0.139864	0.326272	2.18819	6.83405	3.16032	10.6451	7.79288	8.32046
b1948	fliP	6.26326	0.321881	1.23567	0.260491	0.794485	0.900636	8.75277	5.85775	2.10688	0	17.534	3.32818
b1949	fliQ	1.48026	0.805843	1.72032	0.468425	0.639481	NA	3.28229	0	0	2.12901	0.97411	2.49614
b1950	fliR	10.1444	-0.329596	0.893925	-0.368707	0.712346	0.855528	2.18819	14.6444	16.855	17.0321	6.81877	3.32818
b1951	rcsA	35.3379	1.37308	0.402711	3.40958	0.000650621	0.00540143	20.7878	23.431	14.7482	42.5802	67.2136	43.2664
b1952	dsrB	455.542	0.170015	0.252377	0.673655	0.500531	0.707359	343.546	438.355	504.598	407.706	466.599	572.448
b1953	yodD	1705.3	0.582184	0.363566	1.60132	0.109307	0.276963	1519.7	1367.79	1210.4	1594.63	1366.68	3172.59
b1954	dsrA	77.8009	0.60187	0.338222	1.77951	0.0751562	0.214496	73.3044	43.9332	68.4736	101.128	70.1359	109.83
b1955	yedP	2339.11	0.274001	0.287103	0.954364	0.339899	0.575234	2563.47	2003.35	1786.63	2398.33	1941.4	3341.5
b1956	dgcQ	739.433	0.408607	0.239471	1.70629	0.0879538	0.23934	784.467	555.51	566.751	835.637	731.557	962.677
b1957	yodC	365.182	-0.159098	0.241203	-0.659602	0.509509	0.714089	415.757	357.323	383.452	318.287	284.44	431.832
b1958	yedI	404.057	-0.233542	0.269991	-0.865001	0.387038	0.617051	512.037	439.332	359.223	339.577	304.897	469.274
b1959	yedA	55.429	-0.0852145	0.302942	-0.28129	0.778488	0.895478	60.1753	44.9094	66.3667	47.9028	57.4725	55.7471
b1960	vsr	23.7559	0.0685832	0.462231	0.148374	0.882047	0.941889	22.976	23.431	23.1757	15.9676	37.0162	19.9691
b1961	dcm	318.906	0.275042	0.245855	1.11871	0.263263	0.492992	272.43	320.224	272.841	319.352	437.376	291.216
b1962	yedJ	258.578	0.262236	0.218185	1.2019	0.229403	0.45622	260.395	230.405	214.902	292.739	237.683	315.345
b1963	drpB	22.6797	0.814059	0.606611	1.34198	0.179603	0.388573	14.2232	20.5021	14.7482	22.3546	12.6634	51.5869
b1967	hchA	16218.8	0.996203	0.371703	2.68011	0.00735986	0.0374851	12787.8	9780.5	9926.57	19038.7	12949.8	32829.2
b1968	hprS	93.671	0.91829	0.319023	2.87844	0.00399644	0.0231793	61.2694	60.5301	72.6874	97.9346	165.599	104.006
b1969	hprR	62.4212	0.279385	0.385277	0.725154	0.468357	0.68286	36.1052	49.7909	83.2218	64.9349	78.9029	61.5714
b1970	hiuH	147.363	0.751097	0.255651	2.93798	0.00330361	0.0201259	87.5277	115.202	126.413	210.772	181.185	163.081
b1971	msrP	674.075	0.253524	0.265969	0.953211	0.340483	0.575491	629.105	564.297	652.08	705.768	545.502	947.7
b1972	msrQ	91.6787	0.628388	0.326574	1.92418	0.0543314	0.170273	59.0812	97.6292	58.9927	131.999	92.5405	109.83
b1973	zinT	34.1867	1.39658	0.501462	2.78502	0.00535239	0.029317	8.75277	25.3836	22.1222	40.4512	70.1359	38.2741
b1974	yodB	78.6265	1.64057	0.312818	5.2445	1.56706e-07	3.68607e-06	26.2583	46.862	41.0842	121.354	130.531	105.67
b1975	serU	385.07	-1.12099	0.423828	-2.64492	0.00817102	0.0409421	371.993	482.288	727.927	382.158	176.314	169.737
b1976	mtfA	2256.19	-0.509942	0.14543	-3.50645	0.000454124	0.00403941	2549.24	2616.46	2786.35	1987.43	1802.1	1795.56
b1977	asnT	31.4045	-0.737244	0.513044	-1.437	0.150718	0.343086	21.8819	42.9569	52.672	24.4836	33.1198	13.3127
b1978	yeeJ	542.182	0.167155	0.155414	1.07554	0.282131	0.514473	518.602	512.553	501.438	581.22	537.709	601.569
b1981	shiA	338.731	0.413044	0.192948	2.1407	0.0322984	0.116088	305.253	295.817	270.734	348.093	436.401	376.085
b1982	amn	2524.15	0.209427	0.205486	1.01918	0.308118	0.544252	2368.72	2261.09	2393.42	3276.55	2539.51	2305.6
b1983	yeeN	439.817	1.63923	0.458634	3.57417	0.000351347	0.00324097	158.644	226.5	255.986	538.64	1116.33	342.803
b1984	asnW	6.50909	-0.245881	0.924187	-0.266051	0.7902	0.899142	4.37638	14.6444	2.10688	3.19352	9.7411	4.99228
b1985	yeeO	99.6039	0.431837	0.23609	1.82912	0.0673815	0.199396	89.7159	87.8663	76.9011	104.322	125.66	113.158
b1986	asnU	1.35243	-1.6785	2.08542	-0.804875	0.420892	NA	0	1.95258	4.21376	0	1.94822	0
b1987	cbl	134.284	-0.892091	0.774839	-1.15133	0.249599	0.480033	400.439	64.4353	58.9927	39.3867	93.5146	148.936
b1988	nac	48.9358	-0.556689	0.308553	-1.80419	0.0712009	0.207028	53.6107	50.7672	70.5805	37.2577	38.9644	42.4343
b1989	asnV	2.97214	0.263011	1.30446	0.201624	0.840211	NA	3.28229	4.88146	0	1.06451	1.94822	6.65637
b1990	ldtA	4577.37	0.0816167	0.245651	0.332247	0.739703	0.872639	5029.56	4292.76	4022.03	4451.76	3752.27	5915.85
b1991	cobT	244.11	0.0260088	0.215583	0.120644	0.903973	0.951708	259.301	217.713	248.612	242.707	282.492	213.836
b1992	cobS	77.2205	-0.328071	0.29101	-1.12735	0.259593	0.490194	86.4336	91.7715	80.0615	50.0318	75.9806	79.0444
b1993	cobU	91.3193	0.00673043	0.268696	0.0250485	0.980016	0.991017	79.869	98.6055	94.8096	100.064	73.0583	101.51
b1994	insH6	84.028	-0.423281	0.248278	-1.70487	0.0882188	0.239589	91.9041	108.368	88.489	73.4509	66.2395	75.7162
b1996	insD3	0	NA	NA	NA	NA	NA	0	0	0	0	0	0
b1997	insC3	0	NA	NA	NA	NA	NA	0	0	0	0	0	0
b1999	yeeP	77.1918	0.825315	0.404314	2.04127	0.0412237	0.140986	54.7048	69.3167	43.1911	90.483	62.3431	143.112
b2000	flu	2743.93	2.54144	0.213806	11.8866	1.38903e-32	5.88114e-30	718.821	709.764	984.967	4861.6	4302.65	4885.77
b2001	yeeR	72.5858	0.504325	0.37733	1.33656	0.181366	0.390989	39.3875	62.4827	77.9546	85.1605	108.126	62.4035
b2002	yeeS	40.7125	-0.672183	0.347281	-1.93556	0.0529213	0.167591	43.7638	53.6961	52.672	35.1287	22.4045	36.61
b2003	yeeT	9.67742	-1.06507	0.59682	-1.78458	0.07433	0.212788	10.941	13.6681	14.7482	4.25802	7.79288	6.65637
b2004	cbeA	24.5495	0.71071	0.419491	1.69422	0.0902235	0.243627	13.1292	19.5258	23.1757	32.9997	24.3528	34.1139
b2005	cbtA	6.15144	1.38275	0.909137	1.52095	0.128272	0.308663	2.18819	3.90517	4.21376	4.25802	4.87055	17.473
b2006	yeeW	33.5386	-0.188154	0.532924	-0.35306	0.724043	0.861139	35.0111	44.9094	27.3894	32.9997	12.6634	48.2587
b2007	tmaR	1765.91	-0.00504692	0.209401	-0.0241017	0.980772	0.991335	1845.74	1775.88	1685.5	1491.37	2136.22	1660.76
b2008	yeeA	796.65	0.326313	0.2522	1.29386	0.195712	0.413084	809.631	664.855	646.812	864.379	692.593	1101.63
b2009	sbmC	2983.48	-0.105104	0.259349	-0.405262	0.685285	0.837857	3256.03	3075.32	2945.42	2855.01	2097.26	3671.82
b2010	dacD	76.2849	0.0133088	0.278773	0.0477407	0.961923	0.98092	86.4336	76.1508	65.3133	65.9994	90.5923	73.22
b2011	sbcB	1017.95	-0.345325	0.199349	-1.73226	0.0832273	0.230016	975.934	1232.08	1209.35	977.217	787.081	926.067
b2012	tsuB	801.342	0.245152	1.34738	0.181947	0.855624	0.928187	1985.78	123.989	90.5959	306.578	978.981	1322.12
b2013	tsuA	713.681	-0.167996	1.58749	-0.105825	0.915721	0.956377	2159.75	59.5538	46.3514	179.902	777.34	1059.19
b2014	plaP	39.3827	-0.248804	0.45579	-0.545875	0.585152	0.769659	24.0701	51.7435	52.672	24.4836	35.068	48.2587
b2015	yeeY	872.46	0.225058	0.337084	0.667662	0.504349	0.711098	903.723	748.816	761.637	784.541	644.861	1391.18
b2016	yeeZ	2596.3	-0.116885	0.223105	-0.523898	0.600349	0.77876	3270.25	2382.15	2452.41	2404.72	2226.82	2841.44
b2017	yefM	281.14	-0.399203	0.209174	-1.90848	0.0563298	0.175368	272.43	318.271	368.704	243.772	229.89	253.774
b2018	hisL	45.6671	-2.05641	0.610694	-3.36734	0.000758984	0.00614443	48.1402	80.056	92.7027	6.38704	35.068	11.6486
b2019	hisG	992.736	-0.677194	0.219994	-3.07824	0.00208224	0.0139057	974.84	1349.24	1339.98	834.573	770.521	687.27
b2020	hisD	1098.15	-0.494579	0.247543	-1.99795	0.0457217	0.151713	1072.21	1391.22	1389.49	1079.41	946.835	709.735
b2021	hisC	989.231	-0.395399	0.27221	-1.45255	0.146348	0.335324	968.275	1200.84	1201.98	1067.7	882.544	614.05
b2022	hisB	880.701	-0.3222	0.2077	-1.55127	0.120836	0.296821	926.699	1029.99	978.646	798.38	909.819	640.675
b2023	hisH	271.3	-0.254907	0.296299	-0.860303	0.389622	0.618962	276.806	299.722	308.658	250.159	324.379	168.073
b2024	hisA	227.13	-0.262124	0.254892	-1.02837	0.303775	0.540152	212.255	275.314	254.933	226.74	233.786	159.753
b2025	hisF	369.467	0.00763177	0.255986	0.0298132	0.976216	0.988968	359.958	385.635	359.223	444.964	397.437	269.583
b2026	hisI	373.367	0.0732735	0.301844	0.242753	0.808197	0.90839	295.406	379.778	416.109	373.642	500.693	274.575
b2027	wzzB	395.053	0.800164	0.189741	4.21714	2.47415e-05	0.000316234	275.712	289.959	299.177	436.448	552.321	516.701
b2028	ugd	136.5	1.19444	0.275962	4.32826	1.50292e-05	0.000205934	74.3985	70.293	104.291	196.934	213.33	159.753
b2029	gnd	5197.73	0.866845	0.404857	2.14112	0.0322647	0.116088	2719.92	4118	4206.39	6992.74	9673.89	3475.46
b2030	insH7	0	NA	NA	NA	NA	NA	0	0	0	0	0	0
b2032	wbbK	549.832	0.685042	0.565968	1.21039	0.226129	0.453417	179.432	515.482	569.911	684.477	1067.63	282.064
b2033	wbbJ	341.982	0.479984	0.561563	0.854728	0.392702	0.621986	145.515	332.916	378.185	354.481	681.877	158.921
b2034	wbbI	409.866	0.893193	0.520792	1.71507	0.0863327	0.236285	117.068	351.465	391.88	555.672	756.884	286.224
b2035	wbbH	180.661	0.619059	0.452417	1.36834	0.171207	0.374233	82.0572	150.349	194.886	171.385	338.016	147.272
b2036	glf	708.735	0.487312	0.441793	1.10303	0.270013	0.502447	334.793	711.717	723.713	714.284	1259.52	508.38
b2037	rfbX	191.46	0.577146	0.265525	2.1736	0.029735	0.109667	141.138	137.657	182.245	196.934	284.44	206.347
b2038	rfbC	135.925	0.899472	0.428601	2.09863	0.0358498	0.12607	74.3985	114.226	95.8631	113.902	287.363	129.799
b2039	rfbA	311.748	0.392791	0.345043	1.13838	0.254961	0.486496	185.996	308.508	313.925	310.836	484.133	267.087
b2040	rfbD	235.232	0.0717732	0.278025	0.258154	0.796288	0.901707	214.443	234.31	239.131	219.288	319.508	184.714
b2041	rfbB	265.634	0.302384	0.26608	1.13644	0.255771	0.486685	243.983	214.784	254.933	250.159	382.825	247.118
b2042	galF	1213.82	0.709319	0.224201	3.16376	0.00155744	0.0109903	1106.13	838.635	819.577	1284.86	1668.65	1565.08
b2043	wcaM	47.6705	0.23254	0.328643	0.707575	0.479209	0.692679	52.5166	35.1465	44.2445	42.5802	51.6279	59.9073
b2044	wcaL	40.8703	-0.477577	0.387583	-1.23219	0.217877	0.443505	44.8579	58.5775	38.9773	46.8383	24.3528	31.6177
b2045	wcaK	51.1944	0.400306	0.431649	0.927389	0.353725	0.586619	31.7288	35.1465	65.3133	77.7089	56.4984	40.7703
b2046	wzxC	20.6079	0.345233	0.446434	0.773313	0.439337	0.660132	18.5996	13.6681	22.1222	29.8062	19.4822	19.9691
b2047	wcaJ	29.7081	-0.388381	0.415431	-0.934888	0.349846	0.583628	32.8229	45.8857	22.1222	27.6772	27.2751	22.4652
b2048	cpsG	90.7957	0.137449	0.305604	0.449763	0.652881	0.81867	76.5867	83.9611	99.0234	102.193	68.1877	114.822
b2049	cpsB	22.0167	0.292789	0.40115	0.729875	0.465467	0.680755	21.8819	17.5733	20.0154	25.5481	20.4563	26.6255
b2050	wcaI	32.9231	-0.415911	0.469285	-0.886266	0.375474	0.606939	45.952	27.3362	40.0307	23.4191	17.534	43.2664
b2051	gmm	4.1394	-0.465041	0.925747	-0.502341	0.615428	0.792012	2.18819	5.85775	6.32064	2.12901	5.84466	2.49614
b2052	fcl	13.4373	-0.268189	0.587074	-0.456823	0.647799	0.814364	17.5055	11.7155	14.7482	19.1611	5.84466	11.6486
b2053	gmd	19.1817	0.0264917	0.482747	0.0548769	0.956237	0.978721	15.3173	22.4547	18.9619	22.3546	24.3528	11.6486
b2054	wcaF	1.67061	1.19235	1.71107	0.696845	0.4859	NA	0	0.976292	2.10688	0	1.94822	4.99228
b2055	wcaE	0.532253	2.46255	3.98644	0.61773	0.536753	NA	0	0	0	3.19352	0	0
b2056	wcaD	3.74741	0.777087	1.09535	0.709441	0.478051	NA	0	1.95258	6.32064	5.32253	3.89644	4.99228
b2057	wcaC	17.0748	-0.0255686	0.480906	-0.0531676	0.957598	0.979341	19.6937	21.4784	10.5344	14.9031	17.534	18.305
b2058	wcaB	14.1261	-1.15568	0.619054	-1.86686	0.0619217	0.18794	17.5055	23.431	17.9085	4.25802	5.84466	15.8089
b2059	wcaA	13.9563	-1.19084	0.704245	-1.69095	0.0908467	0.244685	8.75277	13.6681	35.817	10.6451	4.87055	9.98455
b2060	wzc	18.9554	-0.257613	0.514834	-0.50038	0.616807	0.792371	22.976	11.7155	27.3894	19.1611	11.6893	20.8012
b2061	wzb	2.42311	-1.40714	1.31742	-1.0681	0.285475	NA	2.18819	1.95258	6.32064	2.12901	1.94822	0
b2062	wza	7.43736	-0.651664	0.836252	-0.779268	0.435822	0.65832	16.4114	6.83405	4.21376	4.25802	2.92233	9.98455
b2063	yegH	362.761	0.67459	0.250059	2.69772	0.00698158	0.0358738	339.17	261.646	238.077	398.125	406.204	533.341
b2064	asmA	1210.92	-0.10527	0.153862	-0.684185	0.493858	0.702452	1193.66	1272.11	1298.89	1229.5	1197.18	1074.17
b2065	dcd	1396.95	-0.492349	0.166492	-2.9572	0.00310446	0.0191888	1437.64	1737.8	1723.43	1137.96	1204.97	1139.9
b2066	udk	89.9664	1.12972	0.2663	4.2423	2.21237e-05	0.00028911	53.6107	55.6487	60.0461	108.58	147.091	114.822
b2067	dgcE	815.494	0.0327235	0.272865	0.119926	0.904542	0.951708	900.441	710.741	807.989	851.605	591.285	1030.91
b2068	alkA	367.931	0.494941	0.199723	2.47813	0.0132072	0.059123	318.382	265.551	332.887	408.77	405.23	476.762
b2069	yegD	82.9053	-0.222725	0.258447	-0.861782	0.388807	0.618411	83.1513	98.6055	86.3821	67.0639	74.0324	88.1969
b2070	yegI	88.2582	-0.433434	0.240313	-1.80363	0.0712897	0.207028	102.845	91.7715	109.558	80.9025	72.0842	72.388
b2071	yegJ	3.34178	-0.175404	1.1617	-0.150989	0.879985	NA	4.37638	0	6.32064	2.12901	3.89644	3.32818
[truncated: 2,640 more rows]

## Sheet: LTMPR1 vs lon Duplicated genes
LTMPR1 vs Lon
Gene	Gene symbol	log2FoldChange
b0023	rpsT	0.56203
b0024	yaaY	0.592354		Note: Fold change in expression levels of duplicated genes in LTMPR1 compared to E. coli Δlon ("Lon")
b0025	ribF	0.625091
b0026	ileS	0.307858
b0027	lspA	0.361965
b0028	fkpB	0.720473
b0029	ispH	0.758434
b0030	rihC	0.241069
b0031	dapB	1.18962
b0032	carA	-0.574834
b0033	carB	1.40483
b0034	caiF	2.07624
b0035	caiE	0.222361
b0036	caiD	0.440527
b0037	caiC	0.786908
b0038	caiB	1.21655
b0039	caiA	0.786143
b0040	caiT	0.938728
b0041	fixA	1.69648
b0042	fixB	-0.106049
b0043	fixC	1.29755
b0044	fixX	0.688927
b0045	yaaU	0.811338
b0046	kefF	1.36391
b0047	kefC	1.31128
b0048	folA	1.17277
b0049	apaH	1.05057
b0050	apaG	0.941489
b0051	rsmA	0.753948
b0052	pdxA	1.0051
b0053	surA	0.638707
b0054	lptD	1.00555
b0055	djlA	1.07996
b0056	yabP	1.22897
b0057	yabQ	2.35211
b0058	rluA	0.658819
b0059	rapA	0.495353
b0060	polB	0.556789
b0061	araD	0.778636
b0062	araA	0.405092
b0063	araB	0.21877
b0064	araC	-0.11859
b0065	yabI	-0.0484684
b0066	thiQ	-0.0963706
b0067	thiP	0.654076
b0068	thiB	0.979062
b0069	sgrR	0.754082
b0070	setA	1.03962
b0071	leuD	1.20103
b0072	leuC	1.04739
b0073	leuB	1.27366
b0074	leuA	0.979704
b0075	leuL	0.604682
b0076	leuO	1.60314
b0077	ilvI	0.651434
b0078	ilvH	0.934395
b0080	cra	0.110628
b0081	mraZ	0.49959
b0082	rsmH	0.816287
b0083	ftsL	0.704736
b0084	ftsI	0.713212
b0085	murE	0.851777
b0086	murF	0.997971
b0087	mraY	1.00068
b0088	murD	0.720741
b0089	ftsW	0.851809
b0090	murG	0.944328
b0091	murC	1.03235
b0092	ddlB	0.842531
b0093	ftsQ	0.954001
b0094	ftsA	0.909596
b0095	ftsZ	0.868974
b0096	lpxC	0.260412
b0097	secM	0.802984
b0098	secA	-0.050696
b0099	mutT	1.29836
b0101	yacG	1.13016
b0102	zapD	1.40137
b0103	coaE	1.08165
b0104	guaC	1.49987
b0106	hofC	0.777833
b0107	hofB	0.373278
b0108	ppdD	0.992977
b0109	nadC	0.621775
b0110	ampD	0.332744
b0111	ampE	0.589664
b0112	aroP	0.420413
b0113	pdhR	-0.440412
b0114	aceE	0.798879
b0115	aceF	0.623431
b0116	lpd	-0.494032
b0117	yacH	0.867491
b0118	acnB	-0.192768
b0119	yacL	0.595194
b0120	speD	1.64305
b0121	speE	1.45779
b0122	yacC	0.0118438
b0123	cueO	0.760371
b0124	gcd	-0.856867
b0125	hpt	0.146508
b0126	can	0.730354
b0127	yadG	-0.161562
b0128	yadH	-0.192694
b0129	yadI	0.175236
b0130	yadE	1.40732
b0131	panD	1.32739
b0132	rpnC	0.381741
b0133	panC	0.438366
b0134	panB	0.525623
b0135	yadC	0.992751
b0136	yadK	0.635995
b0137	yadL	1.23341
b0138	yadM	1.08578
b0139	htrE	1.91192
b0140	yadV	0.141644
b0141	yadN	2.1935
b0142	folK	1.02324
b0143	pcnB	0.918528
b0144	gluQ	1.16994
b0145	dksA	1.25471
b0146	sfsA	1.16627
b0147	thpR	0.617266
b0148	hrpB	0.372078
b0149	mrcB	0.485286
b0150	fhuA	-0.345425
b0151	fhuC	0.299097
b0152	fhuD	0.999464
b0153	fhuB	1.09212
b0154	hemL	2.46244
b0155	clcA	0.699614
b0156	erpA	0.615312
b0157	yadS	0.0315286
b0158	btuF	1.11359
b0159	mtn	0.854311
b0160	dgt	0.967636
b0161	degP	0.988523
b0162	cdaR	0.603258
b0163	yaeH	0.950779
b0164	yaeI	1.24731
b0166	dapD	0.519221
b0167	glnD	0.912441
b0168	map	0.0903033
b0169	rpsB	0.301623
b0170	tsf	0.574143
b0171	pyrH	0.857663
b0172	frr	0.761437
b0173	dxr	0.913609
b0174	ispU	0.626447
b0175	cdsA	0.292256
b0176	rseP	0.73456
b0177	bamA	0.877028
b0178	skp	0.900651
b0179	lpxD	0.760371
b0180	fabZ	-0.0432269
b0181	lpxA	0.465858
b0182	lpxB	0.602174
b0183	rnhB	0.497213
b0184	dnaE	1.23263
b0185	accA	1.04069
b0186	ldcC	0.959502
b0187	yaeR	0.840578
b0188	tilS	0.920939
b0189	rof	1.27355
b0190	yaeQ	0.312812
b0191	arfB	1.30465
b0192	nlpE	1.24484
b0193	yaeF	0.648975
b0194	proS	1.07774
b0195	trmO	1.64021
b0196	rcsF	0.986683
b0197	metQ	-0.0786779
b0198	metI	-0.134086
b0199	metN	-0.137676
b0200	gmhB	0.793374

## Sheet: E. coli lon mgrB vs lon
E. coli △lon △mgrB vs E. coli △lon
Gene	Gene symbol	baseMean	log2FoldChange	lfcSE	stat	pvalue	padj	Lon_1	Lon_2	Lon_3	Lon_mgrB_1	Lon_mgrB_2	Lon_mgrB_3
b0001	thrL	230.021	-0.585051	0.318297	-1.83806	0.0660529	0.111066	261.976	263.856	301.41	122.056	149.117	281.71
b0002	thrA	1797.28	-2.21741	0.267623	-8.28557	1.17548e-16	1.09379e-15	1807.87	3633.83	3433.36	634.69	622.328	651.581
b0003	thrB	1046.9	-2.09262	0.181998	-11.4981	1.34878e-30	2.37905e-29	1476.27	1936.71	1675.89	422.077	407.703	362.778			Note: RNA sequencing to determine gene regulatory changes in E. coli △lon△mgrB. E.coli △lon (labelled as "Lon") was used as the reference strain.
b0004	thrC	1570.37	-1.0267	0.152512	-6.73192	1.67437e-11	1.06116e-10	1960.1	2295.55	2064.55	1081.97	1012.79	1007.27
b0005	yaaX	66.3221	-0.45273	0.305391	-1.48246	0.138218	0.209836	81.4249	63.3255	84.9841	43.3101	62.0604	62.8275
b0006	yaaA	427.981	0.191512	0.182678	1.04836	0.294472	0.397456	398.864	408.45	390.927	420.502	423.218	525.927
b0007	yaaJ	635.935	0.288095	0.205573	1.40142	0.161088	0.238778	643.138	625.867	448.716	632.328	736.968	728.596
b0008	talB	22891.3	-0.026408	0.138182	-0.19111	0.848439	0.888918	23885.8	22997.7	22418.8	23078	21130.7	23836.9
b0009	mog	1080.51	-0.345234	0.157668	-2.18963	0.0285514	0.0531572	1339.38	1146.19	1142.19	928.411	989.519	937.345
b0010	satP	243.578	-0.63507	0.192797	-3.29398	0.00098779	0.00251363	269.056	291.297	328.605	196.077	181.872	194.562
b0011	yaaW	8.36662	-0.386469	0.763666	-0.50607	0.612807	0.704384	11.8007	3.16628	13.5975	7.08711	9.48145	5.06673
b0012	mbiA	0	NA	NA	NA	NA	NA	0	0	0	0	0	0
b0013	yaaI	12.5051	0.0427821	0.58655	0.0729387	0.941855	0.957571	11.8007	10.5543	14.7306	12.5993	17.239	8.10677
b0014	dnaK	72857.3	-2.11226	0.174815	-12.0828	1.30198e-33	2.50802e-32	137381	115867	101783	29391	25693.9	27028
b0015	dnaJ	6833.13	-1.665	0.156124	-10.6646	1.4909e-26	2.28154e-25	10067.2	11503.1	9599.8	3401.02	3403.84	3023.82
b0016	insL1	124.964	-1.68453	0.260736	-6.46068	1.04231e-10	6.16129e-10	153.409	198.42	219.826	51.9721	66.3702	59.7874
b0018	mokC	0	NA	NA	NA	NA	NA	0	0	0	0	0	0
b0019	nhaA	1672.99	-0.732388	0.232789	-3.14615	0.00165436	0.00403663	2639.82	1829.05	1798.26	1521.37	1206.73	1042.73
b0020	nhaR	1113.64	0.232043	0.171952	1.34947	0.177187	0.259143	1145.85	947.772	979.017	1133.94	1138.64	1336.6
b0021	insB1	46.2443	-0.964887	0.372039	-2.59351	0.00950017	0.0197094	83.785	47.4941	52.1236	30.7108	25.8585	37.4938
b0022	insA1	10.4245	-0.303415	0.7335	-0.413653	0.679128	0.761289	4.72028	12.6651	16.9968	3.93728	12.0673	12.1602
b0023	rpsT	2507.88	2.62425	0.161938	16.2053	4.62947e-59	1.91817e-57	653.759	740.908	704.801	3836.49	4584.71	4526.62
b0024	yaaY	164.705	-1.54718	0.224634	-6.88754	5.67661e-12	3.80056e-11	223.033	282.854	230.024	81.108	81.0233	90.1878
b0025	ribF	1853.5	0.55331	0.174044	3.17914	0.00147711	0.00365597	1738.24	1446.99	1322.35	2243.46	2316.92	2053.04
b0026	ileS	10151.9	0.592158	0.188536	3.14083	0.0016847	0.00409701	7514.69	8553.17	8224.19	13705.7	13190.4	9723.05
b0027	lspA	651.659	0.537246	0.227452	2.36202	0.0181757	0.0354632	423.645	568.874	602.821	867.777	837.816	609.021
b0028	fkpB	650.068	0.646683	0.22598	2.86168	0.00421396	0.00951553	390.603	602.648	526.901	815.017	896.428	668.808
b0029	ispH	864.324	0.975775	0.209411	4.65962	3.16794e-06	1.16237e-05	499.17	692.359	556.363	1167.8	1307.58	962.679
b0030	rihC	4296.66	-0.831372	0.158255	-5.25338	1.4933e-07	6.55859e-07	5625.4	5612.75	5266.75	3466.38	2762.55	3046.12
b0031	dapB	1304.17	0.911705	0.144457	6.31127	2.76756e-10	1.58476e-09	912.195	908.721	895.166	1737.13	1768.72	1603.11
b0032	carA	1720.06	2.70081	0.368391	7.33136	2.27832e-13	1.70395e-12	210.053	562.542	602.821	2755.31	3991.69	2197.95
b0033	carB	5141.05	3.18674	0.321802	9.90279	4.04815e-23	5.32319e-22	549.913	1103.97	1398.27	11008.6	9672.81	7112.68
b0034	caiF	358.507	2.56208	0.204675	12.5178	5.96805e-36	1.24226e-34	88.5053	118.208	104.247	581.143	592.16	666.782
b0035	caiE	39.1463	0.134896	0.391057	0.344952	0.730131	0.801283	40.1224	43.2724	28.328	27.561	49.9931	45.6006
b0036	caiD	46.5155	-0.374386	0.430559	-0.869536	0.384554	0.492696	30.6818	81.2677	45.3249	44.885	29.3063	47.6273
b0037	caiC	110.781	0.282536	0.305259	0.925562	0.354674	0.462371	97.9459	124.54	77.0523	88.1951	148.255	128.695
b0038	caiB	115.786	0.562373	0.269687	2.08528	0.0370437	0.0668979	87.3252	84.434	108.78	114.969	171.528	127.682
b0039	caiA	264.79	-0.63265	0.224499	-2.81805	0.00483166	0.010761	250.175	360.955	354.667	228.362	193.939	200.643
b0040	caiT	22.5364	-1.09887	0.476765	-2.30485	0.0211749	0.0407538	30.6818	39.0507	22.6624	18.899	13.7912	10.1335
b0041	fixA	16.4816	1.1103	0.527061	2.10659	0.0351535	0.0638519	8.26049	10.5543	12.4643	18.899	28.4444	20.2669
b0042	fixB	21.2858	-0.124867	0.475234	-0.262748	0.792745	0.84879	23.6014	15.8314	27.1949	14.9617	25.8585	20.2669
b0043	fixC	21.9441	0.764906	0.554525	1.37939	0.167775	0.247105	17.7011	8.4434	22.6624	30.7108	14.6532	37.4938
b0044	fixX	1.08295	-1.21256	2.26399	-0.535588	0.592243	NA	2.36014	2.11085	0	0	0	2.02669
b0045	yaaU	16.4479	-0.0699713	0.543173	-0.12882	0.8975	0.925093	23.6014	15.8314	11.3312	21.2613	15.5151	11.1468
b0046	kefF	177.105	1.27689	0.246285	5.18459	2.16489e-07	9.33093e-07	108.566	83.3786	118.978	270.885	274.1	206.723
b0047	kefC	434.433	1.37175	0.231424	5.9274	3.07764e-09	1.60534e-08	290.297	240.637	196.03	690.599	684.389	504.646
b0048	folA	867.738	0.95451	0.231599	4.12138	3.76602e-05	0.000118061	689.161	599.482	483.843	1088.26	1420.49	925.185
b0049	apaH	781.191	0.562371	0.186435	3.01645	0.00255754	0.00601967	682.081	586.816	624.35	1023.69	992.967	777.236
b0050	apaG	512.625	-0.152546	0.188705	-0.808384	0.418869	0.525321	624.257	486.551	508.771	531.533	447.352	477.286
b0051	rsmA	1924.19	0.275271	0.238137	1.15594	0.247708	0.343738	2323.56	1495.54	1405.07	2212.75	2295.37	1812.88
b0052	pdxA	1190.28	0.845562	0.19101	4.4268	9.56399e-06	3.2985e-05	999.52	836.952	717.266	1500.89	1682.53	1404.5
b0053	surA	5118.33	0.218468	0.178754	1.22217	0.221642	0.31341	5205.29	4618.54	4371.58	6269.73	5562.17	4682.67
b0054	lptD	8999.43	-0.0169477	0.175898	-0.0963495	0.923243	0.945238	10749.3	8387.46	8020.23	8751	8663.46	9425.13
b0055	djlA	335.901	0.809659	0.217502	3.72254	0.000197228	0.000554562	252.535	272.3	207.361	410.265	505.103	367.845
b0056	yabP	27.5713	0.140925	0.437687	0.321978	0.747469	0.814208	15.3409	32.7182	30.5943	32.2857	30.1683	24.3203
b0057	yabQ	9.80702	0.658281	0.737556	0.892516	0.372116	0.480545	8.26049	2.11085	12.4643	9.44948	10.3434	16.2135
b0058	rluA	204.298	-0.329611	0.202307	-1.62926	0.103258	0.163132	238.374	222.695	222.092	200.801	182.733	159.095
b0059	rapA	1468.93	0.338502	0.172954	1.95719	0.0503257	0.0873292	1292.18	1306.62	1294.02	1820.6	1723.04	1377.14
b0060	polB	1514.16	-0.0442296	0.157656	-0.280545	0.779059	0.838224	1621.42	1530.37	1460.59	1627.67	1353.26	1491.65
b0061	araD	135.253	0.255349	0.232824	1.09675	0.272753	0.373419	118.007	129.817	122.377	173.24	135.326	132.748
b0062	araA	531.056	-0.597937	0.227149	-2.63235	0.00847965	0.0177515	686.801	624.812	607.353	522.084	314.612	430.672
b0063	araB	342.822	-0.466989	0.250913	-1.86116	0.0627214	0.106278	482.649	355.678	355.8	370.105	235.312	257.39
b0064	araC	835.066	-1.98378	0.204338	-9.70837	2.77736e-22	3.5357e-21	1203.67	1306.62	1488.92	380.341	268.067	362.778
b0065	yabI	687.82	-2.43692	0.242358	-10.0551	8.72757e-24	1.18673e-22	1446.77	1018.49	1017.54	195.289	179.286	269.55
b0066	thiQ	200.958	-1.74122	0.292724	-5.94835	2.70857e-09	1.42468e-08	383.523	290.242	254.952	125.993	68.956	82.081
b0067	thiP	84.6975	0.754929	0.357297	2.11289	0.0346103	0.0630217	76.7046	69.6581	43.0586	136.23	114.639	67.8942
b0068	thiB	122.447	0.782097	0.242397	3.22651	0.0012531	0.00314492	82.6049	105.543	81.5847	138.592	161.185	165.175
b0069	sgrR	396.678	-0.471773	0.17308	-2.72575	0.00641548	0.0138393	494.45	424.281	464.58	351.993	321.507	323.257
b0070	setA	81.8362	0.245734	0.28077	0.875215	0.381457	0.489871	62.5437	91.822	70.2535	93.7073	95.6765	77.0143
b0071	leuD	191.346	-0.0511882	0.22228	-0.230287	0.817869	0.867819	188.811	175.201	219.826	162.216	186.181	215.843
b0072	leuC	229.23	-0.0660852	0.195749	-0.337601	0.735664	0.805544	244.275	223.75	235.689	248.049	201.696	221.923
b0073	leuB	130.479	0.441091	0.287067	1.53654	0.124405	0.191715	93.2256	140.372	98.5816	178.753	159.461	112.481
b0074	leuA	188.25	-0.118963	0.230072	-0.517069	0.605108	0.698275	178.191	176.256	233.423	185.84	155.151	200.643
b0075	leuL	126.984	-0.972441	0.280509	-3.4667	0.000526895	0.00139489	136.888	149.87	217.559	81.108	74.1277	102.348
b0076	leuO	61.146	0.762742	0.369332	2.06519	0.0389048	0.0697998	63.7238	33.7736	38.5261	62.9965	65.5082	102.348
b0077	ilvI	153.412	0.177091	0.218266	0.811356	0.417161	0.523777	127.448	157.258	147.306	177.965	153.427	157.069
b0078	ilvH	40.2547	0.295297	0.344302	0.857668	0.391076	0.499449	38.9423	39.0507	30.5943	51.1847	42.2356	39.5205
b0080	cra	2113.99	-0.986213	0.168073	-5.86778	4.41667e-09	2.26877e-08	2668.14	2851.76	2909.86	1635.55	1337.75	1280.87
b0081	mraZ	1948.29	-0.549494	0.15291	-3.59359	0.000326158	0.000891405	2363.68	2300.83	2280.97	1746.58	1550.65	1447.06
b0082	rsmH	1836.06	-0.0989636	0.181832	-0.544259	0.586263	0.680952	2211.45	1853.33	1632.83	1880.45	1823.02	1615.27
b0083	ftsL	305.074	-0.273031	0.24053	-1.13512	0.256325	0.354242	436.626	278.632	286.68	300.021	250.828	277.657
b0084	ftsI	940.718	0.0285132	0.152763	0.18665	0.851935	0.891943	975.918	891.834	926.893	1013.46	899.876	936.332
b0085	murE	1961.92	0.141886	0.212516	0.667648	0.504358	0.610337	2098.17	1892.38	1606.77	2486	2044.55	1643.65
b0086	murF	3128.6	0.298638	0.202456	1.47507	0.140192	0.212392	3446.99	2625.9	2345.56	3606.55	3699.49	3047.13
b0087	mraY	1048.76	0.307267	0.170056	1.80686	0.0707843	0.117924	1000.7	964.659	847.575	1200.08	1248.97	1030.57
b0088	murD	1730.78	-0.0766277	0.215093	-0.356254	0.72165	0.795017	1921.15	1734.06	1675.89	2118.26	1623.05	1312.28
b0089	ftsW	927.729	0.0531058	0.19107	0.277939	0.781059	0.840169	911.015	835.897	985.816	1022.12	1040.37	771.156
b0090	murG	1238.37	0.305991	0.175531	1.74323	0.081294	0.133325	1137.59	1093.42	1092.33	1538.69	1417.05	1151.16
b0091	murC	2883	0.368374	0.156219	2.35807	0.0183703	0.0357793	2442.75	2643.84	2464.54	3418.35	3454.7	2873.85
b0092	ddlB	1513.3	-0.335908	0.164968	-2.0362	0.04173	0.0742919	1860.97	1660.18	1545.58	1444.2	1349.81	1219.06
b0093	ftsQ	1553.67	-0.252399	0.20824	-1.21206	0.225489	0.317827	1925.88	1749.89	1392.61	1571.76	1525.65	1156.23
b0094	ftsA	2505.54	-0.018453	0.161595	-0.114193	0.909085	0.935059	2738.94	2457.03	2369.36	2539.55	2703.08	2225.31
b0095	ftsZ	10134.9	-0.107618	0.17716	-0.607462	0.543544	0.644157	11499.8	10854	9185.08	10498.4	10373.6	8398.61
b0096	lpxC	38575.8	-0.817634	0.146158	-5.59419	2.21658e-08	1.06048e-07	51525.4	49125.8	47018.9	26875.1	26324	30585.8
b0097	secM	2640.16	0.46207	0.161579	2.85971	0.00424026	0.00956999	1976.62	2351.49	2334.23	2805.71	3277.14	3095.77
b0098	secA	11887.5	0.387421	0.269201	1.43915	0.150108	0.225162	6273.26	11826	12803.1	14371.9	13965.3	12085.2
b0099	mutT	85.1432	1.27391	0.309822	4.11175	3.9267e-05	0.00012266	36.5822	54.8821	57.7892	100.007	149.117	112.481
b0101	yacG	86.9177	1.12329	0.305876	3.67236	0.000240319	0.000670145	73.1644	39.0507	52.1236	103.944	127.569	125.655
b0102	zapD	399.63	0.886278	0.184445	4.8051	1.54675e-06	5.98004e-06	306.818	275.466	259.485	464.599	559.406	532.007
b0103	coaE	133.108	-0.0421985	0.240879	-0.175186	0.860934	0.899434	158.129	135.094	112.179	144.892	120.673	127.682
b0104	guaC	1680.19	2.85779	0.209306	13.6536	1.92066e-42	4.87602e-41	306.818	458.055	456.648	3104.94	2666.01	3088.68
b0106	hofC	50.3405	-0.40061	0.317389	-1.26221	0.206875	0.29519	47.2028	61.2147	63.4548	48.8223	38.7878	42.5605
b0107	hofB	167.812	-1.19702	0.226824	-5.27732	1.31084e-07	5.80947e-07	230.114	260.69	209.627	89.77	99.1243	117.548
b0108	ppdD	6.87123	0.419282	0.847926	0.494479	0.620968	0.711714	2.36014	10.5543	4.53249	4.72474	6.8956	12.1602
b0109	nadC	445.407	0.297043	0.187093	1.58767	0.11236	0.175368	384.703	412.671	402.258	552.794	502.517	417.499
b0110	ampD	480.925	-0.505144	0.170252	-2.96703	0.00300693	0.00699493	535.752	578.373	579.025	438.613	375.81	377.978
b0111	ampE	494.572	-0.267429	0.182758	-1.46329	0.143387	0.216411	595.936	561.486	463.447	467.749	419.77	459.046
b0112	aroP	441.309	-1.01504	0.185273	-5.4786	4.28695e-08	2.00514e-07	610.097	583.65	577.892	331.519	250.828	293.87
b0113	pdhR	307.208	-0.709076	0.267952	-2.64628	0.00813821	0.0171101	276.137	431.669	436.252	264.585	260.309	174.296
b0114	aceE	13012	1.31327	0.203395	6.45675	1.06974e-10	6.30646e-10	6024.26	7748.93	8628.72	18284.7	21335.9	16049.4
b0115	aceF	7520.72	0.98962	0.294552	3.35974	0.000780151	0.00202388	3037.5	5704.57	6371.54	10956.7	11538.1	7515.99
b0116	lpd	25235	-1.19765	0.177065	-6.7639	1.34324e-11	8.6598e-11	30945	39106.7	35388.5	15785.4	16911.5	13272.8
b0117	yacH	176.519	-1.37916	0.22577	-6.10871	1.00442e-09	5.54893e-09	261.976	238.526	265.15	102.369	112.054	79.041
b0118	acnB	57115.5	-2.71256	0.156246	-17.3608	1.63368e-67	8.34315e-66	101516	99388.3	96428.6	16469.7	13156.8	15734.2
b0119	yacL	424.518	-1.17679	0.228927	-5.14045	2.74075e-07	1.16303e-06	607.736	586.816	572.226	340.181	217.211	222.936
b0120	speD	611.417	1.58673	0.198807	7.98125	1.44863e-15	1.24023e-14	286.757	305.018	324.073	777.22	886.085	1089.35
b0121	speE	792.485	1.18595	0.147623	8.03362	9.46415e-16	8.18239e-15	480.289	486.551	484.976	1120.55	1080.02	1102.52
b0122	yacC	225.409	-0.0877461	0.205497	-0.426994	0.669384	0.754216	247.815	233.249	215.293	205.526	198.249	252.323
b0123	cueO	669.77	0.731828	0.179912	4.06769	4.7481e-05	0.00014583	502.71	512.937	495.174	932.348	867.122	708.329
b0124	gcd	4062.74	-3.76381	0.157188	-23.9446	1.05132e-126	2.3087e-124	8236.89	7530.46	6938.1	596.892	530.961	543.153
b0125	hpt	388.809	0.641248	0.209445	3.06165	0.00220118	0.00523705	326.88	288.131	296.878	475.624	560.268	385.071
b0126	can	1511.94	-0.134017	0.148893	-0.900092	0.368071	0.476022	1658	1526.14	1562.57	1410.33	1550.65	1363.96
b0127	yadG	2275.8	-1.41783	0.159515	-8.88834	6.20275e-19	6.59624e-18	3090.6	3224.32	3620.32	1149.69	1217.07	1352.82
b0128	yadH	1356.06	-1.45964	0.17204	-8.48434	2.16942e-17	2.12681e-16	1695.76	2089.74	2181.26	748.084	687.836	733.663
b0129	yadI	371.248	-1.05592	0.205859	-5.12932	2.90793e-07	1.23041e-06	407.124	575.207	521.236	236.237	229.279	258.403
b0130	yadE	196.127	0.904523	0.223684	4.04376	5.26019e-05	0.000160547	119.187	166.757	123.51	260.648	265.481	241.176
b0131	panD	713.434	1.7028	0.208302	8.17468	2.96641e-16	2.65346e-15	371.722	321.905	312.741	1102.44	1291.2	880.598
b0132	rpnC	80.5931	-0.547912	0.342065	-1.60178	0.109204	0.171356	100.306	62.2701	124.643	73.2334	49.1312	73.9743
b0133	panC	1715.94	0.162949	0.176376	0.923875	0.355552	0.463378	1714.64	1628.52	1514.98	2067.07	1823.02	1547.38
b0134	panB	2328.39	-0.0283289	0.208458	-0.135898	0.891902	0.921269	2945.46	2231.17	1877.58	2478.91	2251.41	2185.79
b0135	yadC	20.81	-0.249251	0.519594	-0.479703	0.631439	0.721832	21.2413	16.8868	29.4612	10.2369	20.6868	26.347
b0136	yadK	9.17919	0.216721	0.80698	0.268558	0.78827	0.845441	2.36014	9.49883	13.5975	6.29965	17.239	6.08008
b0137	yadL	11.7899	-0.298221	0.638595	-0.466997	0.640502	0.730492	8.26049	16.8868	13.5975	6.29965	9.48145	16.2135
b0138	yadM	15.037	0.363308	0.54764	0.663408	0.50707	0.613174	12.9808	10.5543	15.8637	17.324	11.2054	22.2936
b0139	htrE	17.1876	1.27159	0.684375	1.85804	0.0631638	0.106863	2.36014	6.33255	21.5293	29.9233	20.6868	22.2936
b0140	yadV	5.92403	-1.20906	0.858155	-1.40891	0.158863	0.236117	7.08042	6.33255	11.3312	1.57491	5.1717	4.05338
b0141	yadN	2.53936	0.805848	1.43272	0.562461	0.573802	0.670785	2.36014	3.16628	0	0.787456	6.8956	2.02669
b0142	folK	42.9748	2.28814	0.37984	6.02395	1.70215e-09	9.12801e-09	15.3409	11.6097	16.9968	67.7213	79.2994	66.8808
b0143	pcnB	1697.85	1.54989	0.213977	7.24326	4.38016e-13	3.20628e-12	1025.48	827.453	741.061	2584.43	2955.63	2053.04
b0144	gluQ	298.689	0.784408	0.190077	4.1268	3.67848e-05	0.000115564	192.352	248.025	217.559	374.829	384.43	374.938
b0145	dksA	7961.66	0.0559461	0.177848	0.314572	0.753086	0.818499	9215.17	7276.1	6931.3	8546.26	8354.02	7447.08
b0146	sfsA	1862.36	-0.559717	0.159817	-3.50223	0.000461383	0.00123335	2463.99	2142.51	2050.95	1530.03	1399.81	1586.9
b0147	thpR	128.03	-0.400663	0.244533	-1.63848	0.101322	0.160536	142.789	135.094	159.77	130.718	108.606	91.2011
b0148	hrpB	936.432	-0.144584	0.173861	-0.831606	0.405631	0.512819	926.355	1026.93	997.147	933.136	974.004	761.023
b0149	mrcB	1154.82	0.446571	0.175188	2.5491	0.0108002	0.0221449	921.635	1063.87	947.289	1430.02	1423.08	1143.05
b0150	fhuA	1436.47	-2.28116	0.348338	-6.54868	5.80475e-11	3.5068e-10	3902.49	1962.04	1283.83	504.76	490.45	475.259
b0151	fhuC	119.083	-1.12922	0.381379	-2.9609	0.00306744	0.0070981	258.435	138.261	94.0491	85.8328	80.1614	57.7607
b0152	fhuD	101.383	0.208435	0.365056	0.570968	0.568021	0.666154	148.689	77.046	56.6561	113.394	93.9526	118.561
b0153	fhuB	192.77	1.11352	0.234176	4.75504	1.98404e-06	7.5055e-06	138.068	123.485	104.247	249.624	311.164	230.03
b0154	hemL	5290.96	2.2407	0.161346	13.8875	7.54027e-44	2.00708e-42	1811.41	2003.2	1729.14	8914.79	9504.73	7782.5
b0155	clcA	1168.71	-0.136921	0.200899	-0.681539	0.49553	0.602205	1452.67	991.044	1229.44	1218.2	1113.64	1007.27
b0156	erpA	1133.94	0.223796	0.147846	1.51371	0.130099	0.19944	972.378	1102.92	1062.87	1201.66	1232.59	1231.22
b0157	yadS	56.8069	-0.664257	0.32574	-2.03922	0.0414277	0.0738135	68.4441	55.9375	84.9841	52.7596	42.2356	36.4805
b0158	btuF	237.805	0.742591	0.216718	3.42653	0.000611343	0.00160972	219.493	159.369	155.238	298.446	297.373	296.91
b0159	mtn	2261.24	0.518345	0.155363	3.33635	0.000848854	0.00218149	1941.22	1950.43	1686.08	2461.59	2796.17	2731.98
b0160	dgt	592.931	-0.0441735	0.154106	-0.286643	0.774386	0.834831	601.836	588.927	615.285	563.819	611.123	576.594
b0161	degP	4275.46	1.87776	0.164407	11.4214	3.26862e-30	5.69674e-29	1892.83	1811.11	1783.53	6714.64	7589.47	5861.19
b0162	cdaR	452.386	-1.85928	0.273624	-6.79502	1.08296e-11	7.03605e-11	495.63	878.114	754.659	226.787	211.178	147.949
b0163	yaeH	2112.82	-0.550081	0.192556	-2.85673	0.00428029	0.00965043	2735.4	2510.86	2285.51	1645.78	1446.35	2053.04
b0164	yaeI	77.4455	0.050262	0.342956	0.146555	0.883483	0.915155	83.785	74.9352	69.1204	66.1463	55.1648	115.521
b0166	dapD	5093.8	0.254554	0.145515	1.74933	0.080234	0.131783	4537.37	4764.19	4635.6	5824.82	5777.65	5023.16
b0167	glnD	1528.99	-0.0562842	0.159231	-0.353475	0.723732	0.795454	1594.28	1516.65	1565.97	1680.43	1364.47	1452.12
b0168	map	3926.14	-0.496061	0.146462	-3.38697	0.000706681	0.00184089	4237.63	4919.34	4626.53	3391.57	3105.61	3276.15
b0169	rpsB	7559.4	1.77603	0.229337	7.7442	9.6189e-15	7.94102e-14	2777.89	3701.38	3771.03	10803.1	14873.8	9429.18
b0170	tsf	5353.68	2.00801	0.27351	7.34163	2.11007e-13	1.58147e-12	1471.55	2345.15	2578.98	7732.03	11225.2	6769.15
b0171	pyrH	1370.06	1.3192	0.202804	6.50481	7.77941e-11	4.66765e-10	820.149	783.125	748.993	2045.81	2302.27	1520.02
b0172	frr	6601.37	0.253177	0.16921	1.49623	0.134594	0.205398	6971.86	5825.95	5273.55	7464.3	7250.73	6821.85
b0173	dxr	997.125	-0.0550738	0.150471	-0.36601	0.714358	0.789894	1083.3	989.989	975.617	1018.18	978.314	937.345
b0174	ispU	930.517	0.846262	0.186921	4.52738	5.9719e-06	2.11521e-05	659.659	722.966	613.019	1190.63	1377.4	1019.43
b0175	cdsA	390.076	0.219857	0.198795	1.10595	0.268748	0.369087	335.14	405.283	341.07	479.561	414.598	364.805
b0176	rseP	1798.01	0.704467	0.164214	4.28993	1.78727e-05	5.87552e-05	1432.61	1235.9	1434.53	2117.47	2472.94	2094.59
b0177	bamA	8692.22	0.926548	0.14179	6.53464	6.37611e-11	3.84141e-10	6504.55	5770.01	5705.27	11380.3	11706.1	11087
b0178	skp	5055.33	0.91709	0.156668	5.85371	4.80734e-09	2.45795e-08	3101.23	3805.86	3594.26	6557.94	6975.76	6296.93
b0179	lpxD	4610.45	0.797711	0.166048	4.8041	1.55451e-06	5.99946e-06	3410.4	3372.08	3320.05	6231.14	6381.88	4947.16
b0180	fabZ	1143.94	-0.348018	0.168042	-2.07102	0.0383568	0.0689575	1443.23	1281.29	1119.52	1037.08	995.553	986.999
b0181	lpxA	4339.79	0.238857	0.14341	1.66556	0.0958017	0.153151	4011.06	4105.6	3827.68	4748.36	4996.73	4349.28
b0182	lpxB	721.151	0.535924	0.206018	2.60135	0.00928586	0.0192921	462.588	608.98	694.603	907.15	872.294	781.29
b0183	rnhB	174.81	0.895082	0.284494	3.14623	0.00165392	0.00403663	103.846	135.094	128.043	257.498	272.376	152.002
b0184	dnaE	2521.17	1.20723	0.166996	7.22913	4.86092e-13	3.54637e-12	1548.25	1470.21	1553.51	3501.03	3991.69	3062.33
b0185	accA	1824.24	1.61364	0.173716	9.28893	1.55847e-20	1.83507e-19	879.153	917.164	899.698	2916.74	3026.31	2306.38
b0186	ldcC	5292.52	-0.283475	0.265256	-1.06868	0.285212	0.387938	8220.37	4666.03	4546.08	4720.01	4083.92	5518.68
b0187	yaeR	850.712	-0.310037	0.246077	-1.25992	0.207699	0.296077	1275.66	759.906	789.786	727.61	693.008	858.304
b0188	tilS	739.274	0.520676	0.225779	2.30613	0.0211033	0.0406516	748.165	535.101	539.366	1052.04	811.095	749.876
b0189	rof	925.888	-0.169091	0.221219	-0.764359	0.444653	0.549653	1240.25	811.622	888.367	840.216	781.789	993.079
b0190	yaeQ	329.459	-0.115246	0.210172	-0.548342	0.583457	0.67864	325.699	336.681	365.998	332.307	363.743	252.323
b0191	arfB	183.691	0.459677	0.194861	2.359	0.0183243	0.0357213	152.229	150.926	160.903	210.251	218.073	209.763
b0192	nlpE	654.993	-0.218387	0.188118	-1.1609	0.245681	0.341465	816.609	700.802	596.022	616.578	564.577	635.368
b0193	yaeF	106.325	-0.822272	0.268209	-3.06579	0.00217094	0.00517513	120.367	158.314	129.176	85.8328	84.4711	59.7874
b0194	proS	4358.67	1.64241	0.188412	8.71711	2.85401e-18	2.92869e-17	2255.11	2084.46	2005.62	7337.52	7199.87	5269.4
b0195	trmO	215.303	1.69415	0.226891	7.4668	8.21709e-14	6.35378e-13	94.4056	91.822	118.978	334.669	367.191	284.75
b0196	rcsF	404.28	1.53947	0.219267	7.021	2.20293e-12	1.52607e-11	211.233	170.979	239.089	577.993	702.49	523.9
b0197	metQ	2599.79	-1.45905	0.326733	-4.46559	7.98503e-06	2.78778e-05	6037.24	2904.53	2496.27	1232.37	1236.04	1692.29
b0198	metI	268.979	-1.01684	0.249573	-4.07431	4.61506e-05	0.000142341	476.749	313.461	290.079	187.415	163.771	182.402
b0199	metN	479.853	-0.903603	0.185124	-4.88107	1.0551e-06	4.15233e-06	728.104	561.486	586.957	344.118	330.127	328.324
b0200	gmhB	1493.29	-0.715826	0.176466	-4.05645	4.98246e-05	0.000152388	1715.82	1913.49	1938.77	1061.49	1012.79	1317.35
b0201	rrsH	136.733	-0.828195	0.443548	-1.8672	0.0618731	0.105003	71.9843	221.639	231.157	134.655	58.6126	102.348
b0202	ileV	0.501403	0.614232	2.88892	0.212616	0.831626	NA	0	0	1.13312	0	0.86195	1.01335
b0203	alaV	6.3575	1.98628	0.984484	2.01759	0.0436343	0.0770265	0	5.27713	2.26624	5.5122	12.9293	12.1602
b0204	rrlH	64.9372	-0.267462	0.450303	-0.593959	0.55254	0.652529	25.9616	81.2677	105.38	53.547	58.6126	64.8541
b0205	rrfH	2.00275	1.4398	1.58898	0.906119	0.364873	0.47272	0	3.16628	0	2.36237	3.4478	3.04004
b0206	aspU	14.4791	1.25673	0.741622	1.69457	0.0901579	0.145686	1.18007	6.33255	18.1299	22.0488	24.9966	14.1868
b0207	dkgB	157.923	0.584773	0.218424	2.67724	0.00742319	0.0157501	122.727	139.316	116.711	170.091	205.144	193.549
b0208	yafC	283.92	-0.810613	0.200592	-4.04111	5.31998e-05	0.000162147	361.102	376.787	346.735	217.338	171.528	230.03
b0209	yafD	2607.34	-1.06361	0.177583	-5.98934	2.10695e-09	1.1203e-08	3999.26	3452.3	3129.68	1725.32	1491.17	1846.32
b0210	yafE	225.891	0.616565	0.220625	2.79462	0.005196	0.0114505	161.67	184.699	188.098	226	276.686	318.191
b0211	mltD	2834.75	3.03189	0.227603	13.3209	1.74873e-40	4.15159e-39	514.511	660.696	677.607	5067.28	6216.39	3872
b0212	gloB	876.039	-0.0820433	0.200802	-0.408578	0.682849	0.764875	780.027	983.656	938.224	724.46	820.577	1009.29
b0213	yafS	318.798	-1.14881	0.195379	-5.8799	4.10512e-09	2.11865e-08	388.243	447.5	482.71	218.913	181.872	193.549
b0214	rnhA	223.311	-0.446486	0.259719	-1.71911	0.0855946	0.13921	227.754	317.683	226.624	177.965	151.703	238.136
b0215	dnaQ	834.17	-0.140136	0.164499	-0.851896	0.394272	0.502362	857.911	892.89	872.503	761.47	727.486	892.758
b0216	aspV	36.6581	0.904589	0.522305	1.73192	0.0832881	0.135986	15.3409	29.5519	31.7274	41.7352	79.2994	22.2936
b0217	yafT	19.3807	0.633409	0.551945	1.14759	0.251136	0.347837	21.2413	8.4434	15.8637	14.1742	24.1346	32.4271
b0218	yafU	0.287317	1.48298	4.0409	0.366993	0.713624	NA	0	0	0	0	1.7239	0
b0219	yafV	871.768	-0.205739	0.175994	-1.16901	0.2424	0.337653	1008.96	913.998	879.302	890.613	839.54	698.195
b0220	ivy	8608.55	0.44481	0.213041	2.0879	0.0368066	0.0665519	5415.34	7969.52	8490.48	10703.9	8989.28	10082.8
b0221	fadE	9101.54	-5.85859	0.348527	-16.8096	2.07621e-63	9.59865e-62	30021	13082	10581.1	319.707	291.339	314.137
b0222	gmhA	3057.64	-0.175397	0.15035	-1.16659	0.243376	0.338691	3375	3373.14	2981.24	2806.49	2726.35	3083.61
b0223	yafJ	621.634	0.0821077	0.16213	0.506431	0.612554	0.704277	657.299	584.706	569.96	654.376	606.813	656.648
b0224	dpaA	224.223	0.744004	0.198614	3.74598	0.000179693	0.00050917	162.85	150.926	189.231	270.098	284.444	287.79
b0225	yafQ	77.1391	-0.548144	0.286432	-1.91369	0.0556592	0.0953785	89.6854	89.7111	95.1822	47.2474	74.1277	66.8808
b0226	dinJ	612.914	-0.230173	0.160318	-1.43572	0.151081	0.226545	641.958	636.421	707.068	572.481	589.574	529.98
b0227	yafL	72.4103	-0.958208	0.426519	-2.24658	0.0246671	0.0466371	155.769	69.6581	61.1886	33.8606	49.1312	64.8541
b0228	rayT	280.201	-1.3004	0.237589	-5.47332	4.41686e-08	2.06371e-07	423.645	376.787	394.326	129.143	146.532	210.776
b0229	lfhA	177.575	-1.25226	0.276553	-4.52811	5.95125e-06	2.11331e-05	302.098	194.198	254.952	129.143	106.02	79.041
b0230	lafU	31.7085	-1.68375	0.507374	-3.31857	0.0009048	0.00231984	23.6014	56.993	64.5879	13.3868	21.5488	10.1335
b0231	dinB	644.358	-0.730331	0.189329	-3.85747	0.000114567	0.000334783	815.429	804.234	792.052	501.61	396.497	556.327
b0232	yafN	66.1369	-1.14351	0.341985	-3.34374	0.000826568	0.00213556	115.647	82.3232	74.786	29.1359	42.2356	52.694
b0233	yafO	16.4662	-1.53542	0.576607	-2.66284	0.00774832	0.0164003	25.9616	31.6628	15.8637	6.29965	12.9293	6.08008
b0234	yafP	13.5708	-0.599975	0.619556	-0.968394	0.332847	0.440454	25.9616	7.38798	15.8637	11.0244	12.0673	9.12011
b0235	ykfJ	0.513686	0.7128	3.30394	0.215743	0.829188	NA	0	1.05543	0	0	0	2.02669
b0236	prfH	8.57923	0.648358	1.01662	0.637756	0.523632	0.627916	0	4.2217	15.8637	18.1115	5.1717	8.10677
b0237	pepD	9832.22	0.25274	0.145543	1.73653	0.0824701	0.134851	9756.82	8161.6	9001.52	10627.5	10803.7	10642.2
b0238	gpt	244.73	2.51491	0.372223	6.75646	1.41407e-11	9.06653e-11	54.2832	75.9906	88.3835	444.913	593.022	211.789
b0239	frsA	1152.29	-0.43471	0.163912	-2.65209	0.00799953	0.0168508	1300.44	1324.56	1349.55	1093.78	980.038	865.397
b0240	crl	2546.8	-3.50649	0.182867	-19.175	5.98254e-82	4.77733e-80	4090.12	5298.23	4656	414.99	365.467	456.006
b0241	phoE	16.1388	-1.65353	0.59663	-2.77146	0.0055806	0.0122001	18.8811	31.6628	22.6624	3.14983	10.3434	10.1335
b0242	proB	1325.83	2.12585	0.193982	10.959	6.01464e-28	9.89375e-27	528.672	486.551	467.979	2201.73	2510.86	1759.17
b0243	proA	1458.48	1.74454	0.205519	8.48847	2.09378e-17	2.05724e-16	787.107	649.086	575.626	2527.74	2354.85	1856.45
b0244	thrW	41.6801	-0.260286	0.469869	-0.553955	0.57961	0.675238	17.7011	53.8267	64.5879	31.4983	43.9595	38.5071
b0245	ykfI	0	NA	NA	NA	NA	NA	0	0	0	0	0	0
b0246	yafW	0	NA	NA	NA	NA	NA	0	0	0	0	0	0
b0247	ykfG	0	NA	NA	NA	NA	NA	0	0	0	0	0	0
b0248	yafX	0	NA	NA	NA	NA	NA	0	0	0	0	0	0
b0249	ykfF	0	NA	NA	NA	NA	NA	0	0	0	0	0	0
b0250	ykfB	0	NA	NA	NA	NA	NA	0	0	0	0	0	0
b0251	yafY	0	NA	NA	NA	NA	NA	0	0	0	0	0	0
b0252	yafZ	0	NA	NA	NA	NA	NA	0	0	0	0	0	0
b0253	ykfA	0	NA	NA	NA	NA	NA	0	0	0	0	0	0
b0254	perR	0	NA	NA	NA	NA	NA	0	0	0	0	0	0
b0256	insI1	0	NA	NA	NA	NA	NA	0	0	0	0	0	0
b0258	ykfC	6.96973	0.270947	0.847932	0.319539	0.749318	0.815009	4.72028	5.27713	9.06497	8.66202	12.0673	2.02669
b0259	insH1	1.79097	-0.668363	1.50311	-0.444655	0.656569	0.742457	2.36014	3.16628	1.13312	2.36237	1.7239	0
b0260	mmuP	0	NA	NA	NA	NA	NA	0	0	0	0	0	0
b0261	mmuM	0	NA	NA	NA	NA	NA	0	0	0	0	0	0
b0262	afuC	0	NA	NA	NA	NA	NA	0	0	0	0	0	0
b0263	afuB	0	NA	NA	NA	NA	NA	0	0	0	0	0	0
b0264	insB2	0	NA	NA	NA	NA	NA	0	0	0	0	0	0
b0265	insA2	0.337782	1.68703	4.02348	0.419296	0.674999	NA	0	0	0	0	0	2.02669
b0266	yagB	0	NA	NA	NA	NA	NA	0	0	0	0	0	0
b0267	yagA	0	NA	NA	NA	NA	NA	0	0	0	0	0	0
b0268	yagE	0	NA	NA	NA	NA	NA	0	0	0	0	0	0
b0269	yagF	0.168891	0.616126	4.08047	0.150994	0.879981	NA	0	0	0	0	0	1.01335
b0270	yagG	0	NA	NA	NA	NA	NA	0	0	0	0	0	0
b0271	yagH	0	NA	NA	NA	NA	NA	0	0	0	0	0	0
b0272	xynR	0.262485	1.37038	4.05158	0.338233	0.735188	NA	0	0	0	1.57491	0	0
b0273	argF	1.2502	3.58934	2.40131	1.49474	0.134982	0.205704	0	0	0	0	3.4478	4.05338
b0274	insB3	0.320096	-0.345646	3.83578	-0.0901111	0.928199	NA	0	0	1.13312	0.787456	0	0
b0275	insA3	0.574386	-2.81747	3.08802	-0.912388	0.361565	NA	1.18007	0	2.26624	0	0	0
b0276	yagJ	0	NA	NA	NA	NA	NA	0	0	0	0	0	0
b0277	yagK	0	NA	NA	NA	NA	NA	0	0	0	0	0	0
b0278	yagL	0	NA	NA	NA	NA	NA	0	0	0	0	0	0
b0279	yagM	0	NA	NA	NA	NA	NA	0	0	0	0	0	0
b0280	yagN	0	NA	NA	NA	NA	NA	0	0	0	0	0	0
b0281	intF	0	NA	NA	NA	NA	NA	0	0	0	0	0	0
b0282	yagP	82.3949	-0.581736	0.320262	-1.81644	0.0693029	0.115865	84.9651	90.7666	120.111	57.4843	50.8551	90.1878
b0283	paoD	132.297	0.199975	0.264809	0.755169	0.450148	0.555195	145.149	101.321	123.51	174.028	124.121	125.655
b0284	paoC	286.59	0.672673	0.27707	2.42781	0.0151903	0.0302154	313.899	177.311	172.234	395.303	345.642	315.151
b0285	paoB	119.754	0.515761	0.369385	1.39627	0.162634	0.240582	156.949	79.1569	60.0554	170.091	138.774	113.495
b0286	paoA	114.509	0.484642	0.298139	1.62556	0.104044	0.164315	134.528	73.8798	78.1854	133.868	120.673	145.922
b0287	yagU	282.159	-0.477306	0.240093	-1.988	0.0468115	0.0820742	297.378	350.401	336.537	192.139	209.454	307.044
b0288	ykgJ	13.9127	1.84518	0.640659	2.88013	0.00397515	0.009018	7.08042	2.11085	9.06497	17.324	21.5488	26.347
b0289	ecpE	112.941	-0.724726	0.294477	-2.46106	0.0138526	0.0278193	146.329	118.208	157.504	94.4948	57.7507	103.361
b0290	ecpD	220.695	-0.6972	0.215043	-3.24215	0.00118633	0.00298759	324.519	234.304	260.618	173.24	172.39	159.095
b0291	ecpC	117.131	-0.363881	0.262553	-1.38593	0.165767	0.244475	141.608	151.981	101.981	116.544	91.3667	99.3079
b0292	ecpB	10.7121	0.634691	0.747388	0.849212	0.395763	0.50333	16.521	4.2217	4.53249	7.87456	18.9629	12.1602
b0293	ecpA	240.487	0.691784	0.246416	2.80738	0.00499465	0.0110679	127.448	213.196	210.761	300.021	301.683	289.817
b0294	matA	3.4163	1.86519	1.53804	1.2127	0.225244	0.317685	0	2.11085	2.26624	0	12.0673	4.05338
b0295	ykgL	7.07782	-0.106933	0.844876	-0.126566	0.899284	0.926213	4.72028	10.5543	6.79873	6.29965	12.0673	2.02669
b0296	ykgM	3.51679	0.484987	1.07535	0.451003	0.651987	0.738975	1.18007	5.27713	2.26624	4.72474	2.58585	5.06673
b0297	eaeH	3.03727	-0.628631	1.45212	-0.432906	0.665083	0.750719	0	4.2217	6.79873	3.14983	0	4.05338
b0298	insE1	0.648017	-0.491861	2.67888	-0.183607	0.854322	NA	1.18007	0	1.13312	1.57491	0	0
b0299	insF1	2.19391	-1.05356	1.30084	-0.809908	0.417993	0.524671	2.36014	3.16628	3.39936	2.36237	0.86195	1.01335
b0300	ykgA	65.7724	-0.0501234	0.309153	-0.162131	0.871203	0.906711	70.8042	80.2123	49.8573	70.0836	68.956	54.7207
b0301	rclC	5.57291	2.73635	1.13419	2.4126	0.0158394	0.031407	0	4.2217	0	9.44948	8.6195	11.1468
b0303	rclB	3.82779	4.1779	1.48496	2.81347	0.00490101	0.0108933	1.18007	0	0	7.08711	8.6195	6.08008
b0304	rclA	404.901	0.637937	0.23085	2.76342	0.00571987	0.0124797	413.025	252.247	285.547	466.962	505.965	505.66
b0305	rclR	47.2663	0.364565	0.352887	1.03309	0.30156	0.405031	56.6434	35.8845	31.7274	59.8467	50.8551	48.6406
b0306	ykgE	373.453	4.34982	0.444127	9.7941	1.19358e-22	1.5373e-21	21.2413	36.9399	46.458	577.206	1215.35	343.524
b0307	ykgF	755.511	3.9385	0.411024	9.58215	9.50467e-22	1.17922e-20	100.306	84.434	92.916	915.024	2582.4	757.983
b0308	ykgG	334.562	4.36243	0.755479	5.77439	7.72332e-09	3.87667e-08	12.9808	36.9399	43.0586	444.913	1187.77	281.71
b0310	ykgH	4.3838	2.80305	1.21402	2.30889	0.0209495	0.0404263	0	2.11085	1.13312	8.66202	10.3434	4.05338
b0311	betA	2196.06	-3.54936	0.180714	-19.6407	6.94228e-86	5.75292e-84	3778.59	4270.25	4091.7	408.69	318.06	309.071
b0312	betB	4100.35	-3.60878	0.161006	-22.4139	2.88278e-111	4.68932e-109	7322.34	7930.46	7486.53	703.986	591.298	567.474
b0313	betI	2725.45	-3.74864	0.20002	-18.7413	2.28062e-78	1.58992e-76	4568.05	5748.9	4903.02	409.477	301.683	421.552
b0314	betT	1672.94	-3.34031	0.187666	-17.7992	7.17121e-71	3.98683e-69	2534.79	3430.13	3170.47	310.258	275.824	316.164
b0315	pdeL	32.9172	0.54586	0.408472	1.33635	0.181435	0.264037	35.4021	22.1639	22.6624	29.1359	40.5117	47.6273
b0316	yahB	138.377	-0.35062	0.248216	-1.41256	0.157786	0.234834	134.528	160.425	169.968	96.8571	138.774	129.708
b0317	yahC	14.2518	-1.18514	0.703454	-1.68475	0.0920377	0.148287	7.08042	31.6628	20.3962	7.87456	4.30975	14.1868
b0318	yahD	213.659	-1.99086	0.28561	-6.97057	3.15649e-12	2.15604e-11	280.857	395.784	346.735	77.9582	62.0604	118.561
b0319	yahE	30.3323	-1.58755	0.457301	-3.47155	0.00051746	0.00137322	28.3217	53.8267	54.3898	18.899	10.3434	16.2135
b0320	yahF	86.9099	-0.608515	0.269205	-2.26042	0.0237955	0.0452228	103.846	104.487	106.513	77.1707	53.4409	76.0009
b0321	yahG	192.162	-0.337446	0.238672	-1.41385	0.157407	0.234349	261.976	196.309	185.832	197.652	155.151	156.055
b0322	yahH	97.1439	-0.646731	0.28302	-2.28511	0.0223066	0.0427446	134.528	117.152	104.247	67.7213	97.4004	61.8141
b0323	yahI	39.3627	-0.457674	0.36843	-1.24223	0.214153	0.303994	56.6434	32.7182	47.5911	34.6481	36.2019	28.3737
b0324	yahJ	325.054	0.239384	0.18803	1.27312	0.202976	0.29076	287.937	297.63	309.342	394.516	350.814	310.084
b0325	yahK	4526.18	0.708389	0.144227	4.91163	9.0323e-07	3.59654e-06	3572.07	3232.77	3505.88	5514.56	6002.62	5329.19
b0326	yahL	4.19075	-0.678707	0.999966	-0.67873	0.497309	0.603698	4.72028	8.4434	2.26624	3.93728	1.7239	4.05338
b0327	yahM	43.2938	-0.723737	0.335718	-2.15579	0.0311005	0.0573199	44.8427	58.0484	58.9223	31.4983	37.0639	29.387
b0328	yahN	93.9008	-1.19521	0.293114	-4.07764	4.54958e-05	0.000140716	139.248	129.817	122.377	40.9477	56.0268	74.9876
b0329	yahO	4102.8	-0.0429525	0.338371	-0.126939	0.898989	0.926213	5205.29	3867.08	3418.63	2472.61	3207.32	6445.89
b0330	prpR	502.687	-3.96205	0.260233	-15.225	2.41291e-52	8.15192e-51	1237.89	864.393	731.996	56.6969	66.3702	58.7741
b0331	prpB	28.7471	-0.322981	0.600701	-0.537673	0.590803	0.684826	14.1608	42.217	39.6592	33.8606	34.478	8.10677
b0333	prpC	26.2442	-0.755791	0.420134	-1.79893	0.0720297	0.119786	37.7623	33.7736	27.1949	18.899	15.5151	24.3203
b0334	prpD	31.5087	-0.626787	0.471049	-1.33062	0.183314	0.266241	55.4633	40.1062	19.2631	29.9233	18.9629	25.3336
b0335	prpE	55.8917	-0.150388	0.303298	-0.495841	0.620007	0.710798	54.2832	62.2701	60.0554	62.9965	49.1312	46.6139
b0336	codB	151.685	1.76925	0.232957	7.59476	3.08353e-14	2.44456e-13	70.8042	62.2701	73.6529	244.111	252.551	206.723
b0337	codA	689.411	1.21218	0.199164	6.08634	1.15519e-09	6.34991e-09	398.864	467.553	380.729	1144.17	881.775	863.371
b0338	cynR	101.235	0.890034	0.278154	3.19979	0.00137526	0.00342024	54.2832	81.2677	77.0523	143.317	108.606	142.882
b0339	cynT	51.9737	-0.19663	0.351723	-0.559048	0.576129	0.672645	61.3637	62.2701	43.0586	44.885	63.7843	36.4805
b0340	cynS	38.1843	-0.281421	0.474754	-0.592772	0.553333	0.653005	28.3217	68.6026	28.328	23.6237	33.6161	46.6139
b0341	cynX	40.4249	-0.449434	0.403139	-1.11484	0.264921	0.364858	47.2028	60.1592	32.8605	37.7979	42.2356	22.2936
b0342	lacA	22.8386	0.0213952	0.476901	0.044863	0.964216	0.973886	33.042	14.776	20.3962	27.561	18.9629	22.2936
b0343	lacY	25.4376	-0.382379	0.480459	-0.795862	0.426112	0.532186	28.3217	32.7182	24.9287	16.5366	14.6532	35.4671
b0344	lacZ	361.002	0.12565	0.199438	0.630018	0.528683	0.632002	284.397	352.512	398.859	371.679	394.773	363.791
b0345	lacI	1328.62	-2.65433	0.217028	-12.2304	2.13973e-34	4.2142e-33	1794.89	2624.84	2460.01	399.24	388.74	304.004
b0346	mhpR	2290.06	-6.31996	0.244297	-25.87	1.44857e-147	4.54437e-145	3743.18	5306.68	4521.15	71.6585	43.9595	53.7073
b0347	mhpA	39.1743	-1.96944	0.385922	-5.10322	3.33931e-07	1.40079e-06	63.7238	73.8798	49.8573	17.324	18.101	12.1602
b0348	mhpB	13.1352	-2.50402	0.732997	-3.41614	0.000635163	0.00166844	18.8811	18.9977	29.4612	6.29965	5.1717	0
b0349	mhpC	32.3676	-1.77993	0.436774	-4.07516	4.59829e-05	0.000142023	49.563	55.9375	45.3249	17.324	18.9629	7.09342
b0350	mhpD	26.8198	-0.741624	0.470811	-1.57521	0.115209	0.179368	50.743	29.5519	20.3962	16.5366	22.4107	21.2803
b0351	mhpF	68.147	-0.734819	0.395942	-1.85588	0.0634712	0.107217	119.187	42.217	94.0491	47.2474	47.4073	58.7741
b0352	mhpE	61.5694	-1.22313	0.315951	-3.87128	0.000108264	0.000316996	93.2256	86.5449	79.3185	48.0348	31.8922	30.4004
b0353	mhpT	78.5114	-0.598668	0.272129	-2.19994	0.0278109	0.0519767	92.0455	100.265	91.7828	73.2334	62.0604	51.6806
b0354	yaiL	566.705	0.375694	0.172366	2.17963	0.029285	0.0542476	454.327	497.105	528.035	601.617	612.847	706.302
b0355	frmB	247.774	0.620218	0.299674	2.06964	0.0384856	0.0691324	110.927	246.969	227.757	305.533	313.75	281.71
b0356	frmA	1587.57	0.444816	0.150009	2.96527	0.00302419	0.00702393	1272.12	1372.05	1390.34	1915.88	1886.81	1688.23
b0357	frmR	181.065	0.702833	0.229294	3.0652	0.00217525	0.00518096	136.888	116.097	160.903	251.199	220.659	200.643
b0358	yaiO	57.1277	-1.39233	0.366908	-3.79477	0.000147778	0.000423932	115.647	71.7689	61.1886	37.7979	31.0302	25.3336
b0360	insC1	0	NA	NA	NA	NA	NA	0	0	0	0	0	0
b0361	insD1	0	NA	NA	NA	NA	NA	0	0	0	0	0	0
b0363	yaiP	18.4622	-0.236133	0.603632	-0.391187	0.695659	0.775859	25.9616	11.6097	22.6624	22.0488	22.4107	6.08008
b0364	yaiS	0.625099	2.58777	2.98105	0.868072	0.385355	NA	0	0	0	0	1.7239	2.02669
b0365	tauA	45.631	-3.00306	1.54432	-1.94458	0.0518257	0.0896488	224.213	16.8868	2.26624	4.72474	9.48145	16.2135
b0366	tauB	27.8112	-2.62467	0.852539	-3.07865	0.00207942	0.00498788	120.367	8.4434	14.7306	4.72474	9.48145	9.12011
b0367	tauC	9.46469	-0.882459	0.835857	-1.05575	0.291081	0.393847	27.1416	5.27713	4.53249	7.87456	6.8956	5.06673
b0368	tauD	112.514	-1.43293	0.350511	-4.0881	4.34912e-05	0.000134992	250.175	108.709	133.708	56.6969	56.8887	68.9075
b0369	hemB	10655.4	-0.586902	0.192088	-3.05538	0.00224774	0.0053305	9935.01	14436.1	14008.8	8746.28	8458.32	8347.94
b0372	insF2	0	NA	NA	NA	NA	NA	0	0	0	0	0	0
b0373	insE2	0	NA	NA	NA	NA	NA	0	0	0	0	0	0
b0375	iprA	4.72203	3.52948	1.33568	2.64246	0.00823055	0.0172794	0	0	2.26624	6.29965	8.6195	11.1468
b0376	ampH	779.43	2.18871	0.210315	10.4068	2.30781e-25	3.35627e-24	263.156	339.847	237.955	1384.35	1355.85	1095.43
b0377	sbmA	188.797	1.09446	0.231957	4.71837	2.37746e-06	8.86401e-06	114.467	127.706	118.978	218.125	310.302	243.203
b0378	yaiW	230.84	-0.067916	0.21154	-0.321054	0.748169	0.814768	251.355	227.972	230.024	231.512	257.723	186.456
b0379	yaiY	35.7702	-2.2138	0.449041	-4.93006	8.22048e-07	3.29419e-06	80.2448	56.993	39.6592	16.5366	12.0673	9.12011
b0380	yaiZ	369.958	-3.3177	0.206328	-16.0798	3.53698e-58	1.41222e-56	621.897	655.419	739.928	60.6341	74.9897	66.8808
b0381	ddlA	1887.23	0.326208	0.142264	2.29298	0.0218494	0.041905	1594.28	1740.4	1689.48	2041.87	2202.28	2055.07
b0382	iraP	299.45	-0.842772	0.251398	-3.35234	0.000801305	0.00207508	481.469	355.678	316.141	167.728	245.656	230.03
b0383	phoA	216.668	-0.0201816	0.242505	-0.0832214	0.933675	0.952544	269.056	199.475	185.832	202.376	187.905	255.363
b0384	psiF	1566.75	-0.224147	0.246728	-0.908479	0.363625	0.471661	2151.27	1511.37	1401.67	1333.16	1180.01	1823.01
b0385	dgcC	46.8573	0.835932	0.386577	2.1624	0.0305875	0.0564693	48.3829	20.0531	32.8605	59.0592	68.0941	52.694
b0386	proC	1124.25	1.08198	0.188199	5.74914	8.96984e-09	4.47168e-08	843.75	632.2	688.938	1620.59	1609.26	1350.79
b0387	yaiI	457.692	-0.636354	0.187153	-3.40017	0.000673433	0.0017595	510.971	612.147	548.431	396.878	364.605	313.124
b0388	aroL	267.454	-0.561602	0.204122	-2.75131	0.00593572	0.012893	328.06	303.962	325.206	225.213	243.932	178.349
b0389	yaiA	7065.57	-0.448697	0.175177	-2.56139	0.0104256	0.021467	9039.34	7676.11	7750.55	5178.31	5958.66	6790.43
b0390	aroM	441.911	1.77088	0.219234	8.07756	6.6073e-16	5.78073e-15	181.731	204.752	214.16	546.495	816.267	688.062
b0391	ppnP	1716.06	-0.384005	0.163777	-2.34468	0.0190437	0.036976	1840.91	2157.29	1831.12	1454.43	1627.36	1385.24
b0392	ykiA	26.6762	0.433283	0.498603	0.868995	0.38485	0.492931	25.9616	30.6073	11.3312	29.9233	20.6868	41.5472
b0393	rdgC	367.851	1.98347	0.225946	8.77851	1.65647e-18	1.72399e-17	146.329	169.923	129.176	606.341	680.079	475.259
b0394	mak	738.087	0.264844	0.250438	1.05752	0.290273	0.392996	840.21	608.98	563.161	1011.88	780.065	624.221
b0396	araJ	201.688	0.184341	0.20422	0.90266	0.366706	0.474535	207.692	173.09	185.832	198.439	235.312	209.763
b0397	sbcC	464.393	1.05236	0.203615	5.16835	2.36166e-07	1.01095e-06	290.297	275.466	341.07	629.965	720.59	528.967
b0398	sbcD	312.86	0.940431	0.205498	4.57634	4.73176e-06	1.70623e-05	207.692	206.863	228.891	433.101	461.143	339.471
b0399	phoB	144.975	0.0664568	0.245116	0.271124	0.786295	0.844385	155.769	122.429	147.306	178.753	137.912	127.682
b0400	phoR	164.044	0.310275	0.215064	1.44271	0.149103	0.223884	135.708	149.87	154.105	201.589	181.872	161.122
b0401	brnQ	1568.88	-0.378586	0.148497	-2.54945	0.0107894	0.0221331	1852.71	1704.51	1763.14	1260.72	1408.43	1423.75
b0402	proY	347.588	0.664942	0.189812	3.50317	0.000459754	0.00122974	285.577	274.411	247.02	448.063	458.558	371.898
b0403	malZ	529.106	0.812487	0.212098	3.83071	0.000127775	0.000370911	348.121	393.674	410.19	658.314	817.129	547.207
b0404	acpH	217.807	0.566786	0.230831	2.45542	0.0140721	0.0282212	181.731	208.974	135.975	274.822	267.205	238.136
b0405	queA	244.089	1.51736	0.22177	6.84203	7.80769e-12	5.12576e-11	132.168	119.263	128.043	358.293	425.803	300.964
b0406	tgt	838.277	1.4302	0.268307	5.33044	9.79775e-08	4.39548e-07	278.497	535.101	547.298	1229.22	1318.78	1120.76
b0407	yajC	1603.76	0.657543	0.152386	4.31499	1.59613e-05	5.29471e-05	1152.93	1263.34	1316.69	1893.05	1892.84	2103.71
b0408	secD	1768.1	0.663714	0.155468	4.26913	1.96238e-05	6.40324e-05	1329.94	1439.6	1335.95	2271.02	2288.48	1943.6
b0409	secF	1509.7	0.438912	0.172678	2.54179	0.0110286	0.0225501	1426.71	1262.29	1156.92	1752.88	1904.91	1554.47
b0410	yajD	575.861	0.415343	0.239518	1.73408	0.082904	0.135459	480.289	489.717	509.905	481.136	637.843	856.277
b0411	tsx	5033.75	-2.76244	0.272804	-10.1261	4.23107e-24	5.86209e-23	5254.85	10324.2	10744.3	1327.65	1361.88	1189.67
b0412	yajI	140.957	-0.769611	0.235079	-3.27384	0.00106096	0.00268727	201.792	149.87	181.299	101.582	95.6765	115.521
b0413	nrdR	907.875	-0.67559	0.163986	-4.11979	3.79212e-05	0.00011871	1121.07	1149.36	1078.73	621.303	707.661	769.13
b0414	ribD	2105.18	-0.396007	0.149256	-2.65321	0.00797309	0.0168032	2476.97	2443.31	2257.18	1962.34	1786.82	1704.45
b0415	ribE	1535.61	-0.90691	0.167063	-5.42855	5.68144e-08	2.61561e-07	1761.85	2064.41	2182.39	1106.38	980.899	1117.72
b0416	nusB	1142.74	-0.0282019	0.17984	-0.156816	0.875389	0.9087	1165.91	1238.01	1058.34	1309.54	1083.47	1001.19
b0417	thiL	448.532	-0.306985	0.201892	-1.52054	0.128375	0.197209	502.71	485.496	500.84	459.875	424.08	318.191
b0418	pgpA	509.096	-0.866116	0.178615	-4.84908	1.24037e-06	4.84828e-06	686.801	619.535	666.275	395.303	313.75	372.911
b0419	yajO	5769.48	-0.617846	0.195577	-3.1591	0.00158258	0.00388959	8547.25	6081.36	6330.75	4895.62	4076.16	4685.71
b0420	dxs	2535.88	1.00898	0.157894	6.39027	1.65596e-10	9.6973e-10	1714.64	1700.29	1636.23	3575.84	3620.19	2968.09
b0421	ispA	885.476	1.34978	0.161697	8.34757	6.96818e-17	6.60999e-16	507.43	497.105	492.908	1320.56	1355.85	1139
b0422	xseB	501.293	0.157656	0.200927	0.784645	0.432662	0.538162	483.829	424.281	514.437	591.38	561.13	432.699
b0423	thiI	747.067	1.42549	0.202402	7.04285	1.88353e-12	1.32148e-11	454.327	374.676	387.527	1061.49	1290.34	914.038
b0424	yajL	1062.96	-0.139572	0.191888	-0.727364	0.467003	0.573087	1309.88	1089.2	943.89	1025.27	911.082	1098.47
b0425	panE	1416.25	-0.607961	0.185029	-3.28575	0.0010171	0.00258663	1963.64	1723.51	1443.6	1123.7	1024	1219.06
b0426	yajQ	1443.85	0.603202	0.247801	2.43422	0.0149239	0.02978	808.348	1329.84	1300.82	2043.45	1760.96	1419.7
b0427	yajR	144.101	0.760126	0.213877	3.55403	0.00037937	0.00103042	110.927	100.265	109.913	174.815	191.353	177.336
b0428	cyoE	5127.37	-3.13048	0.150849	-20.7524	1.16684e-95	1.19181e-93	9438.2	9379.56	8794.15	1041.8	1149.84	960.652
b0429	cyoD	981.629	-3.37691	0.190491	-17.7275	2.57443e-70	1.39591e-68	1781.91	1790	1799.4	155.129	152.565	210.776
b0430	cyoC	1606.86	-3.4313	0.183334	-18.7162	3.65519e-78	2.50837e-76	2535.97	3140.95	3145.54	240.962	281.858	295.897
b0431	cyoB	9604.69	-3.75287	0.135929	-27.6091	8.65298e-168	3.80039e-165	17216.1	17920.1	18512.9	1379.62	1308.44	1291
b0432	cyoA	7067.09	-4.19569	0.163444	-25.6706	2.49005e-145	7.29086e-143	11648.5	13990.7	14568.5	701.624	724.038	769.13
b0433	ampG	438.344	1.89963	0.22832	8.32003	8.79394e-17	8.25277e-16	151.049	180.478	224.358	670.125	810.233	593.821
b0434	yajG	975.16	1.33417	0.179469	7.43401	1.05353e-13	8.08933e-13	489.729	553.043	618.684	1300.88	1560.13	1328.5
b0435	bolA	11005.6	-1.10658	0.184532	-5.99669	2.01378e-09	1.07336e-08	16436	14556.4	14099.4	6431.94	6146.57	8363.14
b0436	tig	6515.49	2.03466	0.232024	8.76917	1.79986e-18	1.86879e-17	1931.78	2904.53	2832.8	10729.9	12344	8349.97
b0437	clpP	10169.3	-0.798215	0.164459	-4.85358	1.21251e-06	4.7463e-06	13842.2	12344.3	12551.6	6953.24	6814.58	8510.08
b0438	clpX	18388.7	-0.323169	0.160072	-2.01889	0.0434982	0.0768788	23411.4	19216.1	18692	16987.8	15865.1	16159.8
b0439	lon	22879.5	0.259907	0.193648	1.34216	0.179543	0.261891	22740	19452.5	20279.5	22227.5	21928	30649.7
b0440	hupB	11740.4	0.73445	0.272002	2.70016	0.00693066	0.0148052	5234.79	10254.5	10955	14138.8	15328.9	14530.4
b0441	ppiD	2466.12	0.562555	0.141613	3.97247	7.11324e-05	0.000212671	1980.16	2054.91	1938.77	2825.39	3135.78	2861.69
b0442	ybaV	173.385	-0.877908	0.212168	-4.13779	3.5067e-05	0.000110484	253.715	216.362	203.962	128.355	122.397	115.521
b0443	fadM	383.913	-2.3421	0.404981	-5.78323	7.32802e-09	3.6909e-08	1018.4	389.452	515.57	101.582	81.8853	196.589
b0444	queC	488.712	0.405389	0.174038	2.32931	0.0198427	0.0383917	433.086	407.394	421.521	625.24	529.238	515.793
b0445	ybaE	611.623	-0.704446	0.220576	-3.19367	0.00140479	0.00348774	745.805	753.574	773.922	431.526	368.053	596.861
b0446	cof	364.512	0.749135	0.169423	4.42169	9.79308e-06	3.35763e-05	278.497	256.468	281.014	446.488	470.625	453.979
b0447	decR	912.279	-1.18479	0.249101	-4.75627	1.97204e-06	7.46657e-06	842.57	1426.93	1531.98	600.042	542.167	529.98
b0448	mdlA	757.284	0.368938	0.208896	1.76613	0.0773734	0.12737	506.25	706.079	770.523	892.976	877.465	790.41
b0449	mdlB	571.851	0.920522	0.275612	3.33992	0.000838032	0.00216	270.236	394.729	521.236	894.551	752.483	597.874
b0450	glnK	7.84363	-3.61564	1.3224	-2.73415	0.00625406	0.0135243	0	25.3302	18.1299	1.57491	0	2.02669
b0451	amtB	141.234	-0.871532	0.315096	-2.76592	0.00567622	0.0123906	109.747	218.473	219.826	111.819	103.434	84.1077
b0452	tesB	877.237	-0.875677	0.186966	-4.68361	2.8187e-06	1.03944e-05	1312.24	1143.03	951.822	662.251	592.16	601.928
b0453	ybaY	18392.5	-2.46254	0.230689	-10.6747	1.33679e-26	2.05286e-25	40261.6	29205.7	23940.6	5383.05	5065.68	6498.59
b0454	ybaZ	154.62	-0.991311	0.254913	-3.88882	0.000100732	0.000295931	213.593	217.418	186.965	129.143	102.572	78.0276
b0455	ffs	7.4826	-0.81803	0.849902	-0.962499	0.335799	0.443291	2.36014	14.776	11.3312	3.14983	5.1717	8.10677
b0456	ybaA	110.009	0.224965	0.330661	0.680348	0.496284	0.602788	140.428	93.9328	70.2535	104.732	153.427	97.2812
b0457	pdeB	475.418	-0.321179	0.198393	-1.6189	0.105468	0.166266	604.196	498.161	481.577	385.066	393.049	490.459
b0458	ylaC	1761.13	-3.50703	0.226469	-15.4857	4.33408e-54	1.52282e-52	2910.05	3401.64	3399.36	241.749	237.036	376.965
b0459	maa	113.566	0.165135	0.263822	0.625932	0.531359	0.634338	106.206	101.321	113.312	90.5575	130.155	139.842
b0460	hha	140.382	-0.672784	0.330625	-2.03488	0.0418625	0.0744975	210.053	170.979	135.975	66.1463	111.192	147.949
b0461	tomB	640.114	-1.31663	0.248398	-5.30048	1.15499e-07	5.13951e-07	906.294	882.335	950.689	262.223	345.642	493.5
b0462	acrB	4694.27	0.663366	0.16567	4.00415	6.22419e-05	0.000187237	3227.49	3895.57	3777.83	5697.25	6339.64	5227.85
b0463	acrA	1508.58	0.496778	0.218312	2.27554	0.0228737	0.0436092	978.279	1356.22	1419.8	1981.24	1867.85	1448.07
b0464	acrR	301.477	0.0281379	0.225071	0.125018	0.900509	0.927107	239.554	348.29	307.076	259.861	314.612	339.471
b0465	mscK	798.714	0.759268	0.16426	4.62236	3.79401e-06	1.38285e-05	526.311	600.537	652.678	995.345	999	1018.41
b0466	ybaM	45.828	-0.214529	0.332279	-0.64563	0.518519	0.623756	54.2832	52.7713	40.7924	42.5226	49.1312	35.4671
b0467	priC	249.117	-0.437763	0.23526	-1.86076	0.0627776	0.106332	316.259	302.907	241.355	244.899	224.107	165.175
b0468	ybaN	213.126	-1.66354	0.21545	-7.72124	1.15202e-14	9.4046e-14	358.741	334.57	278.748	110.244	93.0906	103.361
b0469	apt	418.688	1.46857	0.17872	8.21715	2.08388e-16	1.88709e-15	225.393	223.75	217.559	637.84	549.924	657.662
b0470	dnaX	1605.71	0.972998	0.158986	6.12001	9.35669e-10	5.19527e-09	1163.55	1091.31	997.147	2195.43	2246.24	1940.56
b0471	ybaB	1248.44	1.06749	0.188508	5.66282	1.48905e-08	7.29087e-08	803.628	759.906	856.64	1808	1889.4	1373.08
b0472	recR	930.084	1.58563	0.227095	6.98223	2.90534e-12	1.99068e-11	460.228	510.826	423.787	1606.41	1561.85	1017.4
b0473	htpG	17213.4	-1.30473	0.1501	-8.69238	3.5493e-18	3.58357e-17	23634.5	26159.8	23725.3	10586.6	8979.8	10194.3
b0474	adk	2916.07	3.46332	0.19691	17.5883	3.02874e-69	1.60268e-67	442.526	477.052	534.833	5113.74	6407.74	4520.54
b0475	hemH	982.806	-0.482689	0.201923	-2.39046	0.0168273	0.0330674	1337.02	1107.14	993.747	945.735	811.957	701.235
b0476	aes	251.094	-0.769778	0.233	-3.30376	0.000953963	0.00243735	299.738	311.35	337.67	143.317	184.457	230.03
b0477	gsk	955.415	-1.28669	0.271197	-4.7445	2.09025e-06	7.86665e-06	853.191	1411.1	1801.66	569.331	578.369	518.833
b0478	ybaL	6525.37	-1.04059	0.226556	-4.59307	4.36774e-06	1.58407e-05	6197.73	10804.4	9342.59	4247.54	4123.57	4436.43
b0479	fsr	333.78	-0.0426323	0.181071	-0.235446	0.813863	0.865493	323.339	370.454	321.806	314.195	317.198	355.684
b0480	ushA	2897.08	-0.778052	0.17734	-4.38735	1.14741e-05	3.90738e-05	3299.48	3797.42	3882.07	2140.31	1834.23	2428.99
b0481	ybaK	308.189	1.1719	0.196238	5.9718	2.34644e-09	1.24163e-08	193.532	184.699	190.364	399.24	492.174	389.125
b0482	ybaP	1023.32	0.938822	0.178506	5.25934	1.44575e-07	6.36883e-07	715.123	702.913	686.672	1137.09	1529.1	1369.03
b0483	ybaQ	720.146	-0.0261958	0.263232	-0.099516	0.920729	0.9435	706.862	810.567	661.743	490.585	684.389	966.732
b0484	copA	5919.98	-0.505991	0.175859	-2.87724	0.00401165	0.00909142	8070.5	6720.95	6052	5074.37	5131.19	4470.88
b0485	glsA	13396.4	-0.0580759	0.18165	-0.319714	0.749185	0.815009	16325.1	12290.4	12382.8	13741.1	12004.4	13634.6
b0486	ybaT	7967.69	-0.241533	0.179418	-1.3462	0.178238	0.260246	10025.9	8327.3	7546.59	8065.13	6663.74	7177.53
b0487	cueR	1202.04	-0.465661	0.169495	-2.74734	0.00600806	0.0130437	1524.65	1328.78	1330.28	1135.51	928.321	964.705
b0488	ybbJ	649.256	-1.23528	0.197569	-6.25241	4.04172e-10	2.29048e-09	952.317	957.271	823.779	371.679	328.403	462.086
b0489	qmcA	1724.71	-1.54723	0.242589	-6.37801	1.794e-10	1.04223e-09	3058.74	2461.25	2189.19	773.282	708.523	1157.24
b0490	fetA	270.82	0.663353	0.216149	3.06896	0.00214806	0.00512732	199.432	239.582	189.231	294.509	312.026	390.138
b0491	fetB	104.293	0.914008	0.319901	2.85716	0.00427453	0.0096424	56.6434	52.7713	107.647	141.742	130.155	136.802
b0492	cnoX	2340.74	0.0661334	0.170372	0.38817	0.69789	0.777163	2172.51	2504.52	2184.66	2709.64	2341.06	2132.08
b0493	ybbO	392.219	-0.139627	0.199171	-0.701043	0.483276	0.589433	463.768	369.399	401.125	398.453	403.393	317.177
b0494	tesA	513.606	-0.498021	0.183634	-2.71204	0.0066871	0.0143617	659.659	619.535	524.635	384.279	445.628	447.899
b0495	ybbA	297.907	0.0228503	0.212384	0.107589	0.914321	0.938467	333.96	271.244	282.147	354.355	285.306	260.43
b0496	ybbP	433	0.120806	0.197116	0.61287	0.539962	0.640776	382.343	474.941	387.527	514.997	431.837	406.352
b0497	rhsD	264.163	0.356064	0.203044	1.75363	0.0794936	0.130714	239.554	238.526	217.559	321.282	319.784	248.27
b0498	ybbC	1.85475	0.624583	1.69677	0.368102	0.712798	0.788765	0	2.11085	2.26624	4.72474	0	2.02669
b0499	ylbH	10.1918	0.357235	0.6507	0.549002	0.583004	0.678404	4.72028	8.4434	13.5975	11.0244	11.2054	12.1602
b0501	ybbD	4.54508	0.0444111	0.962693	0.0461322	0.963205	0.973624	4.72028	4.2217	4.53249	3.14983	8.6195	2.02669
b0502	ylbG	84.5941	-0.108232	0.268512	-0.403082	0.686888	0.767832	71.9843	93.9328	97.4484	83.4704	88.7809	71.9476
b0503	selU	323.909	1.35384	0.239575	5.65101	1.59507e-08	7.77528e-08	161.67	173.09	211.894	424.439	585.264	387.098
b0504	allS	38.2494	0.116604	0.443658	0.262824	0.792686	0.84879	47.2028	17.9422	45.3249	50.3972	36.2019	32.4271
b0505	allA	62.9157	-0.529441	0.346253	-1.52906	0.12625	0.194013	57.8235	65.4364	99.7147	59.8467	37.9258	56.7474
b0506	allR	873.274	0.284436	0.168009	1.69298	0.0904591	0.146065	810.709	835.897	716.133	1006.37	1010.21	860.331
b0507	gcl	165.356	-0.964875	0.268802	-3.58953	0.000331271	0.000904814	283.217	200.531	172.234	116.544	93.9526	125.655
b0508	hyi	3.86047	-0.163623	1.07458	-0.152267	0.878976	0.911346	2.36014	3.16628	6.79873	7.08711	1.7239	2.02669
b0509	glxR	17.9825	0.17047	0.480774	0.354574	0.722909	0.795017	20.0612	12.6651	18.1299	18.1115	20.6868	18.2402
b0511	ybbW	6.22809	-0.96141	0.839838	-1.14476	0.25231	0.349352	5.90035	8.4434	10.1981	1.57491	5.1717	6.08008
b0512	allB	170.07	-1.11382	0.279932	-3.97891	6.92312e-05	0.000207269	310.359	217.418	169.968	94.4948	108.606	119.575
b0513	ybbY	45.0133	0.563929	0.383155	1.47181	0.141073	0.213286	49.563	39.0507	20.3962	51.1847	55.1648	54.7207
b0514	glxK	44.9653	1.65804	0.364964	4.54302	5.54542e-06	1.98335e-05	25.9616	23.2194	15.8637	75.5958	72.4038	56.7474
b0515	allE	83.3942	0.277843	0.443236	0.626851	0.530757	0.633791	30.6818	121.374	73.6529	79.5331	77.5755	117.548
b0516	allC	36.3257	0.605081	0.426224	1.41963	0.155715	0.232285	25.9616	29.5519	30.5943	33.0732	31.8922	66.8808
b0517	allD	16.2813	1.41729	0.61554	2.30252	0.0213058	0.0409519	2.36014	11.6097	12.4643	17.324	27.5824	26.347
b0518	fdrA	16.6732	-0.738105	0.525048	-1.40579	0.159787	0.23733	14.1608	23.2194	24.9287	9.44948	12.0673	16.2135
b0520	ylbF	28.5977	-0.37559	0.395282	-0.950181	0.34202	0.449746	24.7815	37.9953	33.9936	23.6237	25.8585	25.3336
b0521	ybcF	25.837	-0.0962151	0.414357	-0.232203	0.81638	0.86712	21.2413	31.6628	27.1949	25.1986	28.4444	21.2803
b0522	purK	137.768	2.13843	0.359015	5.95637	2.57896e-09	1.35813e-08	55.4633	59.1038	38.5261	251.199	295.649	126.668
b0523	purE	87.9303	2.46184	0.406168	6.06112	1.35175e-09	7.375e-09	20.0612	34.829	26.0618	163.003	202.558	81.0677
b0524	lpxH	278.061	2.07483	0.221029	9.38712	6.16629e-21	7.40954e-20	96.7658	125.596	97.4484	463.812	495.621	389.125
b0525	ppiB	3774.31	0.205223	0.164806	1.24524	0.213044	0.302811	3457.61	3600.06	3460.55	3456.93	4185.63	4485.07
b0526	cysS	923.49	1.2662	0.177178	7.14649	8.90267e-13	6.38898e-12	540.472	549.877	537.1	1332.38	1470.49	1110.63
b0527	ybcI	12.2344	1.0801	0.628413	1.71878	0.0856549	0.139229	5.90035	8.4434	9.06497	11.0244	14.6532	24.3203
b0528	ybcJ	82.9074	0.366172	0.404024	0.906311	0.364771	0.47272	50.743	56.993	109.913	117.331	107.744	54.7207
b0529	folD	1326.23	0.67499	0.186259	3.62393	0.000290157	0.000797478	866.172	1153.58	1044.74	1715.87	1741.14	1435.91
b0530	sfmA	11.599	0.3731	0.893801	0.417431	0.676363	0.759352	14.1608	11.6097	4.53249	1.57491	27.5824	10.1335
b0531	sfmC	2.77598	0.574535	1.35346	0.424493	0.671207	0.755582	0	2.11085	4.53249	0.787456	5.1717	4.05338
b0532	sfmD	18.5957	-0.44023	0.592772	-0.742662	0.457686	0.563543	11.8007	31.6628	20.3962	11.0244	10.3434	26.347
b0533	sfmH	2.15805	-1.37799	1.66114	-0.829546	0.406796	0.513793	7.08042	0	2.26624	1.57491	0	2.02669
b0534	sfmF	12.1883	0.574554	0.683692	0.840369	0.400701	0.507902	9.44056	6.33255	13.5975	6.29965	23.2727	14.1868
b0535	fimZ	3.17375	0.211313	1.33377	0.158433	0.874116	0.907849	2.36014	4.2217	2.26624	1.57491	8.6195	0
b0536	argU	4.17564	-0.445619	0.986838	-0.451562	0.651585	0.738975	3.54021	6.33255	4.53249	1.57491	6.03365	3.04004
b0537	intD	169.065	-0.551834	0.201732	-2.73549	0.00622882	0.0134763	193.532	207.919	201.696	146.467	131.016	133.762
b0539	exoD	77.8082	-0.140011	0.328292	-0.426482	0.669756	0.754442	57.8235	77.046	109.913	67.7213	90.5048	63.8408
b0540	insE3	0	NA	NA	NA	NA	NA	0	0	0	0	0	0
b0541	insF3	0	NA	NA	NA	NA	NA	0	0	0	0	0	0
b0542	renD	12.3226	-0.900661	0.709921	-1.26868	0.204556	0.292356	22.4213	4.2217	21.5293	6.29965	10.3434	9.12011
b0543	emrE	76.9721	0.703711	0.280459	2.50914	0.0121025	0.0245403	51.9231	63.3255	60.0554	81.108	93.9526	111.468
b0544	ybcK	6.11103	0.430527	1.03393	0.416399	0.677118	0.759635	4.72028	8.4434	2.26624	1.57491	3.4478	16.2135
b0545	ybcL	46.2465	-1.0256	0.444287	-2.30843	0.0209754	0.0404408	66.084	52.7713	66.8542	12.5993	39.6497	39.5205
b0546	ybcM	103.94	1.82738	0.437309	4.17869	2.93199e-05	9.31787e-05	73.1644	39.0507	24.9287	93.7073	163.771	229.016
b0547	ybcN	2.89995	-2.11393	1.47671	-1.43152	0.152282	0.228189	3.54021	8.4434	2.26624	3.14983	0	0
b0548	ninE	0	NA	NA	NA	NA	NA	0	0	0	0	0	0
b0549	ybcO	0	NA	NA	NA	NA	NA	0	0	0	0	0	0
b0550	rusA	1.36971	-2.01194	2.11694	-0.9504	0.341909	0.449735	0	2.11085	4.53249	1.57491	0	0
b0551	quuD	19.9686	-0.522467	0.565941	-0.923182	0.355913	0.463436	28.3217	8.4434	33.9936	17.324	15.5151	16.2135
b0552	insH2	0	NA	NA	NA	NA	NA	0	0	0	0	0	0
b0553	nmpC	588.032	-1.07266	0.263514	-4.0706	4.68915e-05	0.000144423	525.131	948.827	916.695	344.906	350.814	441.819
b0554	essD	2.97445	-0.394709	1.56774	-0.25177	0.801219	0.855568	0	2.11085	7.93185	0	1.7239	6.08008
b0555	rrrD	14.1217	0.646985	0.848901	0.762144	0.445974	0.550975	0	14.776	18.1299	9.44948	24.1346	18.2402
b0556	rzpD	7.90512	0.414645	0.796716	0.520442	0.602755	0.696292	5.90035	3.16628	11.3312	6.29965	14.6532	6.08008
b0557	borD	354.775	1.45722	0.32388	4.49925	6.81949e-06	2.39455e-05	122.727	169.923	275.348	375.617	545.615	639.421
b0558	ybcV	196.275	0.124557	0.342432	0.363741	0.716052	0.79097	162.85	167.813	232.29	110.244	231.865	272.59
b0559	ybcW	183.449	0.86646	0.281709	3.07573	0.0020999	0.00502876	97.9459	136.15	155.238	184.265	224.107	302.99
b0560	nohD	115.555	0.0420993	0.26625	0.158119	0.874363	0.907849	87.3252	119.263	134.841	103.944	134.464	113.495
b0561	tfaD	4.97246	0.0820468	1.07898	0.0760413	0.939386	0.956371	0	4.2217	10.1981	3.14983	5.1717	7.09342
b0562	ybcY	39.7815	-0.0820912	0.356786	-0.230085	0.818026	0.867819	46.0228	35.8845	40.7924	29.9233	46.5453	39.5205
b0563	tfaX	2.51482	2.55395	1.60558	1.59067	0.111685	0.174541	0	2.11085	0	1.57491	4.30975	7.09342
b0564	appY	358.962	6.58087	0.443252	14.8468	7.30046e-50	2.27402e-48	4.72028	12.6651	4.53249	489.798	695.594	946.465
b0565	ompT	5258.78	1.93005	0.64838	2.97673	0.00291339	0.00679532	690.341	2586.85	3281.52	6243.74	7994.59	10755.7
b0566	envY	35.6812	0.178209	0.447517	0.398216	0.690471	0.771052	33.042	18.9977	48.7242	49.6098	35.34	28.3737
b0567	ybcH	71.8539	-0.591055	0.304792	-1.93921	0.0524761	0.0906311	84.9651	70.7135	103.114	45.6725	57.7507	68.9075
b0568	nfrA	324.837	-0.0438584	0.175519	-0.249878	0.802682	0.856298	344.581	317.683	327.472	344.118	311.164	304.004
b0569	nfrB	180.646	-0.616984	0.287072	-2.14923	0.0316162	0.0581241	197.072	239.582	218.692	129.93	99.9862	198.616
b0570	cusS	154.171	0.43639	0.2463	1.77178	0.0764312	0.126055	166.39	116.097	111.046	186.627	182.733	162.135
b0571	cusR	153.597	0.492938	0.244529	2.01587	0.0438138	0.0772191	122.727	149.87	109.913	151.979	207.73	179.362
b0572	cusC	12.1681	-0.745445	0.59635	-1.25001	0.211295	0.300521	9.44056	15.8314	20.3962	9.44948	7.75755	10.1335
b0573	cusF	3.11243	4.92261	1.60444	3.06812	0.00215414	0.00513904	0	0	0	9.44948	5.1717	4.05338
b0574	cusB	12.7033	0.630766	0.602366	1.04715	0.295031	0.398021	7.08042	12.6651	10.1981	22.0488	12.0673	12.1602
b0575	cusA	110.215	-0.561479	0.269812	-2.081	0.037434	0.0674642	110.927	150.926	132.575	110.244	77.5755	79.041
b0576	pheP	116.397	0.11075	0.249077	0.444639	0.656581	0.742457	105.026	110.82	120.111	113.394	145.67	103.361
b0577	ybdG	486.592	0.790855	0.179863	4.39697	1.0977e-05	3.74892e-05	355.201	371.51	342.203	537.045	638.705	674.888
b0578	nfsB	9607.93	-0.121697	0.238734	-0.50976	0.61022	0.702881	6700.44	11124.2	12213.9	9447.9	9075.48	9085.66
b0579	ybdF	210.754	-0.637097	0.244822	-2.60229	0.00926046	0.0192484	265.516	274.411	228.891	129.93	156.013	209.763
b0580	ybdJ	90.2884	-1.63352	0.312121	-5.23362	1.6622e-07	7.26407e-07	146.329	142.482	120.111	29.9233	43.0975	59.7874
b0581	ybdK	2658.99	-0.867663	0.194733	-4.45566	8.3635e-06	2.90605e-05	3928.46	3265.49	3111.55	1882.81	1574.78	2190.85
b0582	insL2	18.7825	-1.70749	0.499864	-3.41592	0.00063567	0.00166878	24.7815	27.4411	33.9936	9.44948	6.8956	10.1335
b0583	entD	40.3348	-1.69381	0.407047	-4.16123	3.16543e-05	0.00010038	80.2448	44.3279	60.0554	13.3868	20.6868	23.307
b0584	fepA	133.183	-0.829133	0.227222	-3.649	0.000263261	0.000729031	187.631	176.256	147.306	94.4948	93.0906	100.321
b0585	fes	55.7214	-1.9898	0.456114	-4.36252	1.28572e-05	4.32382e-05	143.969	80.2123	43.0586	24.4111	22.4107	20.2669
b0586	entF	240.26	-1.50393	0.303604	-4.9536	7.28543e-07	2.94096e-06	520.411	265.967	279.881	138.592	129.293	107.415
b0587	fepE	2.98359	0.699296	1.50018	0.46614	0.641115	0.730801	0	0	6.79873	1.57491	3.4478	6.08008
b0588	fepC	21.1272	-2.06842	0.692769	-2.98572	0.00282909	0.00660571	64.9039	28.4965	9.06497	7.87456	10.3434	6.08008
b0589	fepG	43.9911	-1.00007	0.339227	-2.94809	0.00319746	0.00738341	69.6242	47.4941	58.9223	29.9233	27.5824	30.4004
b0590	fepD	105.085	-2.02135	0.355585	-5.68459	1.31126e-08	6.4419e-08	224.213	180.478	100.848	37.7979	34.478	52.694
b0591	entS	24.7264	-1.17068	0.463227	-2.52724	0.0114964	0.0233977	31.8619	33.7736	37.393	16.5366	20.6868	8.10677
b0592	fepB	84.1103	-1.72967	0.297533	-5.81336	6.12309e-09	3.10538e-08	149.869	140.372	97.4484	40.9477	34.478	41.5472
b0593	entC	36.5515	-0.431955	0.554623	-0.778825	0.436083	0.540885	75.5245	18.9977	31.7274	29.1359	45.6834	18.2402
b0594	entE	74.4283	-0.961196	0.342224	-2.80868	0.00497458	0.0110401	139.248	69.6581	86.1172	42.5226	54.3029	54.7207
b0595	entB	59.1771	-0.828109	0.416851	-1.98658	0.0469685	0.0822839	116.827	54.8821	55.5229	30.7108	58.6126	38.5071
b0596	entA	168.326	-1.00978	0.205716	-4.90861	9.17228e-07	3.64567e-06	233.654	226.916	214.16	103.944	119.811	111.468
b0597	entH	48.8162	-0.96053	0.370755	-2.59074	0.00957704	0.0198407	74.3444	56.993	62.3217	44.0976	20.6868	34.4538
b0598	cstA	8205.25	-5.4615	0.191147	-28.5723	1.48638e-179	9.32597e-177	17912.3	15614	14612.7	407.902	296.511	388.112
b0599	hcxA	676.286	-1.76235	0.166473	-10.5864	3.44637e-26	5.18372e-25	1134.05	1007.93	991.481	291.359	302.545	330.351
b0600	ybdL	254.187	-1.00253	0.300454	-3.33672	0.000847722	0.00218039	461.408	257.524	298.011	148.042	136.188	223.949
b0601	ybdM	40.8139	-0.366433	0.332313	-1.10267	0.270169	0.370807	44.8427	46.4387	46.458	30.7108	37.9258	38.5071
b0602	ybdN	16.062	0.872607	0.575189	1.51708	0.129247	0.198341	11.8007	6.33255	15.8637	15.7491	17.239	29.387
b0603	ybdO	39.8519	-0.553241	0.512289	-1.07994	0.28017	0.381789	44.8427	37.9953	58.9223	22.0488	15.5151	59.7874
b0604	dsbG	469.005	0.990468	0.20004	4.95134	7.37037e-07	2.97251e-06	375.262	286.02	281.014	560.669	647.325	663.742
b0605	ahpC	40039.6	-0.636954	0.131357	-4.84901	1.24077e-06	4.84828e-06	47929.7	49653.5	48629	29833.6	32364.5	31827.2
b0606	ahpF	4124.53	0.043662	0.160247	0.272468	0.785262	0.844071	4524.39	3902.96	3759.7	4513.7	4174.43	3872
b0607	uspG	9287.23	-1.64639	0.246081	-6.69043	2.22518e-11	1.39814e-10	18009.1	12850.9	11372	4029.41	3765	5697.03
b0608	ybdR	156.753	0.100424	0.231557	0.433691	0.664513	0.750313	185.271	135.094	133.708	162.216	156.013	168.215
b0610	rnk	1226.24	1.44042	0.171147	8.41628	3.88612e-17	3.76774e-16	571.154	726.133	683.272	1726.1	1923.01	1727.75
b0611	rna	746.728	-0.0312048	0.171734	-0.181704	0.855815	0.895151	774.126	786.292	703.668	761.47	648.187	806.623
b0612	citT	36.383	0.0893383	0.384196	0.232533	0.816124	0.86712	30.6818	29.5519	45.3249	29.9233	36.2019	46.6139
b0613	citG	19.2642	0.836075	0.486369	1.71901	0.0856118	0.13921	15.3409	12.6651	13.5975	22.8362	31.8922	19.2536
b0614	citX	13.2603	0.4596	0.725931	0.633118	0.526656	0.629922	3.54021	7.38798	22.6624	20.4739	16.3771	9.12011
b0615	citF	70.8156	2.7494	0.37439	7.34368	2.07797e-13	1.56008e-12	12.9808	12.6651	29.4612	121.268	137.05	111.468
b0616	citE	50.0914	1.79452	0.350985	5.1128	3.17415e-07	1.33661e-06	27.1416	24.2748	15.8637	84.2578	68.956	80.0543
b0617	citD	13.0313	1.53023	0.631404	2.42353	0.0153703	0.0305597	7.08042	6.33255	6.79873	29.1359	14.6532	14.1868
b0618	citC	82.8988	-0.510113	0.490223	-1.04057	0.298074	0.401207	28.3217	111.875	151.838	56.6969	76.7136	71.9476
b0619	dpiB	113.064	-0.287586	0.252692	-1.13809	0.255084	0.352748	106.206	128.762	138.241	115.756	104.296	85.1211
b0620	dpiA	94.3248	2.56217	0.346909	7.3857	1.51651e-13	1.15434e-12	20.0612	43.2724	18.1299	156.704	164.633	163.149
b0621	dcuC	1545.76	3.88089	0.259536	14.9532	1.48517e-50	4.6927e-49	161.67	159.369	268.55	2417.49	2775.48	3491.99
b0622	pagP	750.842	4.04823	0.312077	12.9719	1.76658e-38	3.84099e-37	128.628	69.6581	58.9223	1088.26	1396.36	1763.22
b0623	cspE	24794.3	1.06926	0.200335	5.33738	9.42984e-08	4.25214e-07	17907.6	15028.2	15078.4	26179.8	36648.4	37923.5
b0624	crcB	198.212	-0.156886	0.224655	-0.698341	0.484964	0.591328	243.095	183.644	200.562	176.39	216.35	169.229
b0627	tatE	139.005	2.16717	0.276787	7.82977	4.8878e-15	4.0968e-14	47.2028	54.8821	49.8573	256.711	255.137	170.242
b0628	lipA	4722.19	0.271183	0.163434	1.65928	0.097059	0.154675	3824.61	4689.25	4325.12	5142.09	5620.78	4731.31
b0629	ybeF	83.8186	-0.765469	0.29807	-2.56809	0.0102262	0.0210761	80.2448	134.039	101.981	53.547	67.2321	65.8675
b0630	lipB	78.6996	1.01301	0.312357	3.24312	0.0011823	0.00297914	38.9423	68.6026	48.7242	107.094	120.673	88.1611
b0631	ybeD	1422.96	-1.05539	0.218333	-4.83386	1.33908e-06	5.20925e-06	1629.68	2325.1	1808.46	751.233	954.179	1069.08
b0632	dacA	1325.82	2.28273	0.167747	13.6081	3.58263e-42	8.99138e-41	473.208	475.997	406.791	2019.83	2395.36	2183.76
b0633	rlpA	1493.41	0.748586	0.183515	4.07915	4.52012e-05	0.000140003	1324.04	1007.93	1011.88	1868.63	2010.07	1737.89
b0634	mrdB	310.211	1.49869	0.230412	6.50439	7.80073e-11	4.67405e-10	148.689	183.644	154.105	448.85	555.096	370.885
b0635	mrdA	470.353	1.48599	0.194319	7.64715	2.05478e-14	1.64083e-13	211.233	249.08	282.147	733.122	722.314	624.221
b0636	rlmH	210.852	1.05614	0.289216	3.65174	0.000260471	0.000723129	88.5053	163.591	158.637	327.582	300.821	225.976
b0637	rsfS	467.671	0.395935	0.25535	1.55056	0.121008	0.187334	263.156	481.274	466.846	504.76	555.958	534.033
b0638	cobC	122.876	1.61299	0.288265	5.59549	2.19999e-08	1.05369e-07	61.3637	41.1616	79.3185	166.153	189.629	199.629
b0639	nadD	370.266	1.52392	0.185683	8.20714	2.26523e-16	2.04289e-15	213.593	192.087	167.702	542.557	570.611	535.047
b0640	holA	640.391	0.839148	0.195571	4.29076	1.7806e-05	5.85797e-05	496.81	466.498	414.722	809.505	957.627	697.182
b0641	lptE	1172.33	0.714723	0.19177	3.72698	0.000193784	0.000545928	829.59	915.054	918.961	1568.61	1633.4	1168.39
b0642	leuS	6845.09	0.465133	0.179446	2.59205	0.00954065	0.019784	6399.52	5535.71	5318.87	8901.41	8200.6	6714.43
b0643	ybeL	7214.09	-1.20787	0.199323	-6.05986	1.36237e-09	7.42374e-09	11798.3	9464	8944.86	4529.45	3592.61	4955.26
b0644	ybeQ	416.678	-0.447009	0.188208	-2.37509	0.0175448	0.0343237	474.388	483.385	483.843	350.418	301.683	406.352
b0645	ybeR	3.39097	-0.326015	1.09394	-0.29802	0.765688	0.828294	2.36014	2.11085	6.79873	1.57491	3.4478	4.05338
b0646	djlB	10.4092	-0.0362974	0.633256	-0.0573188	0.954291	0.967955	14.1608	8.4434	9.06497	7.87456	13.7912	9.12011
b0647	ybeT	4.64982	-0.625954	0.935091	-0.669404	0.503238	0.609503	4.72028	5.27713	6.79873	1.57491	3.4478	6.08008
b0648	ybeU	9.26874	-0.970251	0.880845	-1.1015	0.270679	0.371305	25.9616	6.33255	4.53249	2.36237	10.3434	6.08008
b0649	djlC	28.1524	-0.695919	0.497891	-1.39773	0.162193	0.240092	37.7623	46.4387	20.3962	32.2857	13.7912	18.2402
b0650	hscC	55.1869	-0.121043	0.337011	-0.359165	0.719472	0.793729	56.6434	74.9352	40.7924	57.4843	46.5453	54.7207
b0651	rihA	4609.25	-0.0611658	0.161812	-0.378006	0.705426	0.783569	4302.54	4749.41	5068.45	4612.13	4024.45	4898.51
b0652	gltL	476.422	-2.73369	0.200915	-13.6062	3.67934e-42	9.18163e-41	958.217	749.352	777.321	130.718	111.192	131.735
b0653	gltK	223.951	-3.45597	0.315434	-10.9562	6.20248e-28	1.01647e-26	542.832	347.235	342.203	43.3101	44.8214	23.307
b0654	gltJ	212.029	-3.01221	0.230403	-13.0736	4.65775e-39	1.03842e-37	429.546	338.791	363.732	48.8223	45.6834	45.6006
b0655	gltI	4894.77	-4.14708	0.181185	-22.8887	6.02143e-116	1.05784e-113	10691.4	8642.88	8464.42	500.035	480.106	589.767
b0656	insH3	32.06	-4.09578	0.558679	-7.33119	2.28124e-13	1.70395e-12	57.8235	74.9352	48.7242	2.36237	3.4478	5.06673
b0657	lnt	1332.37	0.584819	0.143705	4.06958	4.70989e-05	0.00014484	1064.42	1097.64	1035.67	1533.97	1675.63	1586.9
b0658	ybeX	4136.12	-0.0538217	0.164048	-0.328086	0.742847	0.810499	4833.57	4087.66	3718.9	4119.18	4083.06	3974.34
b0659	ybeY	1289.54	-0.294854	0.191338	-1.54102	0.123313	0.190298	1653.28	1363.61	1246.43	1315.05	1128.29	1030.57
b0660	ybeZ	4796.19	-0.402447	0.16473	-2.44308	0.0145627	0.0291387	6154.07	5354.17	4874.69	4445.19	3869.3	4079.73
b0661	miaB	1106.79	1.01769	0.203198	5.00838	5.48905e-07	2.24677e-06	828.41	692.359	675.34	1534.75	1716.14	1193.72
b0662	ubiF	4496.4	-0.571116	0.185115	-3.0852	0.00203417	0.00488735	6110.41	5241.24	4773.84	4196.36	3248.69	3407.88
b0664	glnX	226.657	0.333502	0.281065	1.18657	0.235399	0.329258	136.888	225.861	239.089	284.272	279.272	194.562
b0665	glnV	454.925	0.758655	0.310171	2.44592	0.0144482	0.0289228	221.853	366.233	426.054	686.662	650.773	377.978
b0666	metU	12.2298	1.61792	0.781358	2.07066	0.038391	0.0689907	3.54021	2.11085	12.4643	14.9617	30.1683	10.1335
b0668	glnW	0.566561	-2.80151	3.704	-0.756347	0.449441	NA	0	0	3.39936	0	0	0
b0670	glnU	7.73513	1.65217	0.867602	1.90429	0.0568721	0.0970782	3.54021	2.11085	5.66561	18.1115	12.9293	4.05338
b0672	leuW	43.9453	0.909778	0.433409	2.09912	0.0358061	0.0648765	16.521	26.3856	48.7242	57.4843	68.956	45.6006
b0673	metT	51.0093	1.05347	0.356343	2.95633	0.00311327	0.00720035	33.042	35.8845	30.5943	56.6969	93.0906	56.7474
b0674	asnB	1121.81	-0.149598	0.161191	-0.928078	0.353367	0.460941	1325.22	1116.64	1097.99	1023.69	1086.06	1081.24
b0675	umpH	1367.32	0.284171	0.179896	1.57964	0.114189	0.178033	1151.75	1411.1	1136.52	1573.34	1611.85	1319.38
b0676	nagC	2383.03	-0.931052	0.175363	-5.30928	1.10058e-07	4.91235e-07	2586.71	3366.81	3425.43	1692.24	1589.44	1637.57
b0677	nagA	5097.49	-1.31007	0.180414	-7.26144	3.83005e-13	2.81297e-12	5877.93	8083.5	7833.27	2961.62	2839.26	2989.37
b0678	nagB	5914.04	-1.53475	0.224676	-6.83095	8.43549e-12	5.52141e-11	6292.14	10278.8	9808.3	3112.82	2727.21	3265
b0679	nagE	10337.3	-3.18207	0.183776	-17.3149	3.63041e-67	1.8119e-65	15278.4	20936.5	19652.9	2010.38	1908.36	2237.47
b0680	glnS	4712.96	1.54606	0.199941	7.73259	1.05379e-14	8.65091e-14	2992.66	2179.45	2041.88	7480.05	7155.05	6428.67
b0681	chiP	131.743	-2.59316	0.368875	-7.02992	2.06657e-12	1.44299e-11	140.428	294.464	242.488	23.6237	38.7878	50.6673
b0682	chiQ	33.3438	-0.392529	0.360994	-1.08736	0.27688	0.378133	38.9423	33.7736	40.7924	25.9861	30.1683	30.4004
b0683	fur	3636.84	0.166172	0.156902	1.05909	0.28956	0.392515	3205.07	3592.67	3484.35	3450.63	3883.95	4204.37
b0684	fldA	2926.52	0.89986	0.17929	5.01901	5.19393e-07	2.12995e-06	2171.33	2054.91	1900.24	3218.33	3824.47	4389.81
b0685	ybfE	95.4498	-0.292567	0.302928	-0.965795	0.334147	0.441641	103.846	111.875	99.7147	72.446	118.949	65.8675
b0686	ybfF	389.984	-0.289013	0.1766	-1.63654	0.101726	0.16106	398.864	473.886	413.589	351.993	332.713	368.858
b0687	seqA	1537.21	0.25456	0.137398	1.85272	0.063922	0.107896	1442.05	1382.61	1381.27	1691.46	1649.77	1676.07
b0688	pgm	6781.29	0.614965	0.142718	4.30896	1.64025e-05	5.43285e-05	5700.92	5178.97	5193.1	8741.55	8035.96	7837.22
b0689	ybfP	18.08	1.35605	0.610192	2.22233	0.0262609	0.0493741	17.7011	8.4434	4.53249	30.7108	31.8922	15.2002
b0691	ybfG	5.68126	1.02839	0.869983	1.18208	0.237175	0.331216	4.72028	4.2217	2.26624	9.44948	4.30975	9.12011
b0692	potE	63.5739	-0.862195	0.304655	-2.83007	0.00465383	0.0103965	96.7658	63.3255	86.1172	47.2474	41.3736	46.6139
b0693	speF	49.7026	-0.185304	0.360889	-0.513466	0.607626	0.700628	54.2832	65.4364	38.5261	36.223	43.9595	59.7874
b0694	kdpE	88.0954	-0.392782	0.330171	-1.18963	0.234191	0.327778	121.547	90.7666	88.3835	102.369	75.8516	49.654
b0695	kdpD	657.694	-0.388214	0.168629	-2.30218	0.0213253	0.0409715	770.586	762.017	704.801	573.268	625.776	509.713
b0696	kdpC	59.7039	0.448159	0.319285	1.40363	0.160429	0.238042	49.563	62.2701	39.6592	66.9338	81.0233	58.7741
b0697	kdpB	58.8258	-0.151206	0.356492	-0.424151	0.671456	0.755582	57.8235	84.434	43.0586	43.3101	59.4746	64.8541
b0698	kdpA	17.5369	0.781853	0.572844	1.36486	0.172296	0.252832	18.8811	6.33255	13.5975	14.9617	30.1683	21.2803
b0699	ybfA	4646.35	4.722	0.217994	21.6612	4.76948e-104	5.98502e-102	269.056	347.235	401.125	7486.35	8935.84	10438.5
b0700	rhsC	720.988	1.95967	0.19426	10.0879	6.25191e-24	8.52745e-23	292.658	314.517	277.615	1363.09	1057.61	1020.44
b0702	ybfB	11.1308	1.8533	0.671055	2.76177	0.00574884	0.0125305	2.36014	5.27713	6.79873	17.324	19.8249	15.2002
b0703	ybfO	58.9065	0.520877	0.369133	1.41108	0.158221	0.235338	41.3025	70.7135	32.8605	76.3833	55.1648	77.0143
b0704	ybfC	31.9266	1.94945	0.64652	3.0153	0.00256727	0.00603934	11.8007	11.6097	15.8637	35.4355	15.5151	101.335
b0705	ybfL	30.3969	2.49516	0.643572	3.87705	0.000105733	0.000310206	14.1608	2.11085	11.3312	35.4355	30.1683	89.1744
b0706	ybfD	30.0423	0.950912	0.495153	1.92044	0.0548024	0.0940571	11.8007	22.1639	27.1949	30.7108	27.5824	60.8008
b0707	ybgA	2305.28	0.310235	0.188126	1.64908	0.0991304	0.157575	2351.88	1849.1	1973.9	2362.37	2315.2	2979.24
b0708	phr	1432.29	0.484327	0.165115	2.93326	0.00335422	0.00772882	1273.3	1165.19	1144.45	1883.6	1598.06	1529.14
b0709	dtpD	356.576	0.693938	0.169283	4.09928	4.14439e-05	0.00012891	269.056	282.854	265.15	422.077	447.352	452.966
b0710	ybgI	3157.77	-1.19393	0.187054	-6.3828	1.73882e-10	1.0142e-09	5115.61	4187.93	3880.94	2192.28	1748.9	1820.98
b0711	pxpB	2880.94	-1.22103	0.179341	-6.80841	9.86805e-12	6.43034e-11	4658.92	3872.35	3565.93	1927.69	1645.46	1615.27
b0712	pxpC	4078.21	-1.28939	0.184985	-6.97024	3.16411e-12	2.15788e-11	6806.65	5520.93	5037.86	2638.77	2185.04	2280.03
b0713	pxpA	1428.86	-0.935814	0.183189	-5.10845	3.24807e-07	1.36512e-06	2134.75	1826.94	1669.09	1116.61	918.839	906.945
b0714	nei	404.582	-0.0551923	0.196451	-0.280946	0.778752	0.838098	387.063	392.618	457.781	462.237	368.053	359.738
b0715	abrB	289.079	0.544747	0.215245	2.53082	0.0113795	0.0231705	206.512	221.639	277.615	385.854	343.918	298.937
b0716	ybgO	38.8021	-0.882051	0.387179	-2.27814	0.022718	0.0433437	46.0228	36.9399	67.9873	23.6237	31.8922	26.347
b0717	ybgP	7.73858	-0.735428	0.732258	-1.00433	0.31522	0.419911	10.6206	11.6097	6.79873	7.87456	3.4478	6.08008
b0718	ybgQ	34.5989	-0.756243	0.390051	-1.93883	0.0525221	0.090675	37.7623	50.6604	41.9255	20.4739	34.478	22.2936
b0719	ybgD	4.28753	-2.50858	1.32149	-1.8983	0.0576568	0.0982649	9.44056	3.16628	9.06497	0	0	4.05338
b0720	gltA	49157.8	-4.962	0.173101	-28.6653	1.03251e-180	7.55796e-178	97188.3	100501	88087.7	3040.37	2620.33	3509.22
b0721	sdhC	3083.84	-4.89534	0.246705	-19.8429	1.26889e-87	1.09274e-85	4335.58	6686.12	6879.18	200.801	161.185	240.163
b0722	sdhD	2335.62	-4.9742	0.244549	-20.3403	5.65437e-92	5.39869e-90	3694.8	5085.04	4801.04	148.042	103.434	181.389
b0723	sdhA	19650.8	-4.85281	0.216585	-22.406	3.43862e-111	5.39372e-109	30904.9	42884	40172.6	1587.51	1068.82	1286.95
b0724	sdhB	8162.36	-4.66396	0.197984	-23.5573	1.05774e-122	2.21218e-120	13582.6	17527.4	16005.3	681.937	499.931	676.915
b0726	sucA	34662.6	-2.94735	0.186347	-15.8165	2.39554e-56	8.91627e-55	72662.8	58911.7	52532.6	8625.8	7124.88	8117.91
b0727	sucB	16514.2	-1.85449	0.258711	-7.1682	7.59896e-13	5.48024e-12	36455.9	21491.6	19673.3	7891.89	6268.1	7304.2
b0728	sucC	17180	-2.39615	0.306206	-7.82528	5.06545e-15	4.23761e-14	44697.5	21933.8	19992.8	5884.66	4626.09	5945.3
b0729	sucD	14872.3	-2.1392	0.328495	-6.51211	7.41024e-11	4.45223e-10	38707.5	18215.6	15801.4	5543.69	4483	6482.37
b0730	mngR	162.947	0.39547	0.202343	1.95446	0.0506473	0.0878179	139.248	144.593	138.241	183.477	177.562	194.562
b0731	mngA	19.681	0.244677	0.456638	0.535823	0.592081	0.686126	21.2413	14.776	18.1299	21.2613	22.4107	20.2669
b0732	mngB	171.738	0.560793	0.255994	2.19064	0.0284776	0.0530872	171.11	118.208	126.91	167.728	204.282	242.19
b0733	cydA	19656.3	1.22481	0.176978	6.92065	4.49577e-12	3.03775e-11	13090.5	9885.11	12364.6	26275.1	26015.4	30307.2
b0734	cydB	13539.3	1.1301	0.235758	4.79346	1.63928e-06	6.28796e-06	5889.73	8697.76	10888.2	19234.4	18423.3	18102.4
b0735	ybgE	480.347	1.61999	0.280877	5.76763	8.03952e-09	4.03077e-08	140.428	260.69	305.943	666.188	738.691	770.143
b0736	ybgC	182.338	0.388332	0.222906	1.74214	0.0814843	0.133535	155.769	175.201	142.773	187.415	241.346	191.522
b0737	tolQ	276.031	1.98992	0.237012	8.39584	4.62572e-17	4.46509e-16	135.708	100.265	97.4484	389.003	522.342	411.418
b0738	tolR	131.302	1.37194	0.264482	5.18726	2.13413e-07	9.22548e-07	87.3252	60.1592	72.5198	188.202	221.521	158.082
b0739	tolA	399.504	0.737489	0.192681	3.82752	0.000129443	0.000375009	293.838	291.297	313.875	495.31	574.059	428.645
b0740	tolB	2047.71	0.39359	0.183437	2.14564	0.0319015	0.0585751	1496.33	1863.88	1950.1	2283.62	2598.78	2093.57
b0741	pal	4140.37	0.669254	0.151152	4.4277	9.52445e-06	3.28863e-05	3029.24	3411.13	3150.08	4841.28	5559.58	4850.89
b0742	cpoB	1799.23	0.343891	0.161689	2.12687	0.0334312	0.0611064	1472.73	1689.74	1594.3	1789.1	2131.6	2117.89
b0743	lysT	1653.16	1.70564	0.308686	5.52548	3.28577e-08	1.55675e-07	507.43	939.328	880.435	2194.64	3547.79	1849.36
b0744	valT	361.94	1.56346	0.296518	5.27274	1.34402e-07	5.95054e-07	128.628	218.473	201.696	485.861	732.658	404.325
b0745	lysW	200.285	0.68445	0.317631	2.15486	0.0311727	0.0574048	102.666	198.42	159.77	244.899	320.646	175.309
b0746	valZ	430.929	0.80129	0.313705	2.55428	0.0106409	0.0218591	198.252	353.567	390.927	568.544	697.318	376.965
b0747	lysY	40.6945	0.852917	0.506937	1.68249	0.0924735	0.148825	8.26049	40.1062	38.5261	62.9965	51.717	42.5605
b0748	lysZ	202.12	0.821735	0.295418	2.78161	0.00540908	0.0118783	93.2256	150.926	193.764	214.976	297.373	262.457
b0749	lysQ	19.6018	0.82871	0.495531	1.67237	0.0944517	0.151288	9.44056	13.7205	19.2631	29.9233	24.9966	20.2669
b0750	nadA	290.177	-0.701389	0.196445	-3.5704	0.000356433	0.000971124	324.519	373.621	379.596	229.937	192.215	241.176
b0751	pnuC	392.498	-0.429897	0.260435	-1.65069	0.0988017	0.157118	544.013	379.953	427.187	294.509	265.481	443.846
b0752	zitB	448.26	-0.451302	0.21776	-2.07247	0.0382213	0.0687702	627.798	496.05	429.453	384.279	328.403	423.579
b0753	ybgS	4679.43	-1.48949	0.22323	-6.67245	2.51564e-11	1.57152e-10	8669.98	6278.72	5753.99	2217.48	2212.63	2943.77
b0754	aroG	2844.02	-0.225982	0.158941	-1.4218	0.155085	0.231678	2767.27	3289.76	3142.15	2849.02	2573.78	2442.16
b0755	gpmA	12776.2	-1.7711	0.16913	-10.4718	1.16371e-25	1.72087e-24	22375.3	19245.7	17666.5	5931.91	6219.83	5217.72
b0756	galM	4612.55	0.278889	0.142471	1.95751	0.0502874	0.0872973	4417	4162.6	3925.13	5325.57	5000.17	4844.81
b0757	galK	2519.13	-0.329122	0.161455	-2.03848	0.0415021	0.0739161	2455.73	2987.91	2972.18	2367.88	2215.21	2115.87
b0758	galT	1474.4	-0.317192	0.152414	-2.08113	0.0374224	0.0674642	1479.81	1728.79	1698.55	1320.56	1267.93	1350.79
b0759	galE	2780.51	-0.0681427	0.158258	-0.43058	0.666774	0.752394	2860.49	2944.64	2733.09	2847.44	2378.98	2918.44
b0760	modF	349.37	-0.659181	0.185936	-3.5452	0.000392314	0.00106164	433.086	432.724	418.122	310.258	245.656	256.377
b0761	modE	581.08	-0.641115	0.162969	-3.93398	8.35512e-05	0.000247776	696.242	695.525	731.996	430.739	434.423	497.553
b0762	acrZ	637.372	-0.53236	0.243346	-2.18767	0.0286939	0.0533426	649.039	789.458	821.513	444.125	424.942	695.155
b0763	modA	449.739	-0.00148344	0.219879	-0.0067466	0.994617	0.995297	387.063	508.715	453.249	371.679	433.561	544.167
b0764	modB	135.661	-0.524485	0.271047	-1.93503	0.0529864	0.0912254	171.11	182.589	126.91	125.993	123.259	84.1077
b0765	modC	250.584	0.240611	0.223043	1.07876	0.280693	0.382264	244.275	245.914	199.429	326.794	249.966	237.123
b0766	ybhA	326.514	1.33751	0.221854	6.0288	1.65183e-09	8.87985e-09	178.191	199.475	177.9	481.136	552.51	369.871
b0767	pgl	9392.36	0.456981	0.144535	3.16173	0.00156837	0.00385806	7316.44	8018.07	8416.83	11393.7	10316.7	10892.5
b0768	ybhD	41.0604	0.1347	0.373273	0.360861	0.718203	0.79255	50.743	30.6073	36.2599	50.3972	32.7541	45.6006
b0769	ybhH	4.89625	0.672183	1.18036	0.569474	0.569034	0.666987	7.08042	2.11085	2.26624	11.0244	6.8956	0
b0770	ybhI	10.25	0.382101	0.615589	0.620708	0.534792	0.636878	7.08042	10.5543	9.06497	12.5993	12.0673	10.1335
b0771	ybhJ	90.7246	-1.01428	0.322725	-3.14286	0.00167304	0.00407769	107.386	155.148	100.848	44.885	56.0268	80.0543
b0772	ybhC	579.379	1.32206	0.217168	6.08775	1.14512e-09	6.30245e-09	418.925	288.131	286.68	827.617	905.048	749.876
b0773	ybhB	2852.08	1.34395	0.150168	8.94964	3.56646e-19	3.8581e-18	1726.44	1577.86	1531.98	3816.01	4374.4	4085.81
b0774	bioA	54.6791	-0.150234	0.311232	-0.482709	0.629302	0.720139	44.8427	66.4918	61.1886	52.7596	55.1648	47.6273
b0775	bioB	63.7685	-0.372738	0.298166	-1.2501	0.211262	0.300521	66.084	69.6581	80.4516	59.0592	63.7843	43.5739
b0776	bioF	41.3214	-0.367626	0.387536	-0.948624	0.342812	0.450652	33.042	63.3255	43.0586	39.3728	27.5824	41.5472
b0777	bioC	96.2344	2.04448	0.297933	6.8622	6.78102e-12	4.48528e-11	47.2028	28.4965	37.393	162.216	172.39	129.708
b0778	bioD	48.9273	1.1594	0.333832	3.47299	0.000514697	0.00136672	25.9616	29.5519	35.1268	56.6969	73.2658	72.9609
b0779	uvrB	2776.4	-0.38212	0.178265	-2.14355	0.0320688	0.0588575	3595.68	2832.76	2998.24	2714.36	2314.34	2203.01
b0780	ybhK	398.071	0.482338	0.169038	2.85343	0.00432504	0.00973634	350.481	319.794	326.339	448.85	493.036	449.926
b0781	moaA	2446.22	-0.157276	0.165871	-0.948182	0.343037	0.450679	2466.35	2632.23	2640.17	2331.66	2600.5	2006.43
b0782	moaB	1537.65	0.266215	0.145351	1.83153	0.0670214	0.112522	1446.77	1387.88	1354.08	1626.89	1791.99	1618.31
b0783	moaC	813.937	0.307163	0.207843	1.47786	0.139445	0.211479	706.862	752.518	724.065	1018.18	999	682.995
b0784	moaD	456.474	0.412394	0.219304	1.88047	0.0600446	0.102097	357.561	330.348	487.242	476.411	588.712	498.566
b0785	moaE	660.028	0.396063	0.187025	2.1177	0.0342007	0.0623535	614.817	505.549	590.356	796.906	811.095	641.448
b0786	ybhL	7430.11	-0.521447	0.217914	-2.3929	0.0167156	0.0328772	10181.6	8552.11	7540.92	5510.62	5135.5	7659.88
b0787	ybhM	37.0303	-0.401358	0.378728	-1.05975	0.289257	0.392225	50.743	31.6628	44.1917	27.561	39.6497	28.3737
b0788	ybhN	147.027	-0.505898	0.236458	-2.13949	0.0323963	0.059409	180.551	155.148	182.433	145.679	106.882	111.468
b0789	clsB	742.816	-0.0101311	0.22413	-0.0452019	0.963946	0.973886	970.018	663.862	602.821	740.209	781.789	698.195
b0790	ybhP	671.078	0.218231	0.232014	0.940596	0.346912	0.454682	794.188	598.426	469.112	769.345	749.897	645.501
b0791	ybhQ	1505.95	-1.14082	0.23799	-4.79356	1.63848e-06	6.28796e-06	2774.35	1849.1	1593.17	974.871	854.193	990.039
b0792	ybhR	602.913	-0.662106	0.203389	-3.25537	0.00113244	0.00286007	863.812	637.477	715	429.951	430.113	541.127
b0793	ybhS	599.736	-0.516533	0.168578	-3.06406	0.00218354	0.00519788	764.686	694.47	658.343	464.599	479.244	537.073
b0794	ybhF	2130.26	-0.986136	0.1736	-5.68049	1.34307e-08	6.59079e-08	2833.35	2980.52	2679.83	1595.39	1205.87	1486.58
b0795	ybhG	2609.88	-1.15356	0.243656	-4.73438	2.19729e-06	8.24123e-06	2782.61	4061.28	3959.13	1921.39	1192.94	1741.94
b0796	cecR	1722.77	-1.2541	0.273505	-4.5853	4.53346e-06	1.64146e-05	1646.2	2735.66	2900.79	1080.39	752.483	1221.08
b0797	rhlE	493.783	1.52123	0.210029	7.24296	4.3901e-13	3.20821e-12	257.255	282.854	225.491	790.606	813.681	592.807
b0798	ybiA	396.532	-1.01411	0.203194	-4.99084	6.01172e-07	2.44703e-06	496.81	537.211	556.363	238.599	231.003	319.204
b0799	dinG	1189.37	-0.533977	0.150618	-3.54524	0.000392258	0.00106164	1283.92	1479.71	1457.19	969.359	978.314	967.745
b0800	ybiB	2528.18	-0.946362	0.19702	-4.80339	1.55999e-06	6.01006e-06	4029.94	3134.61	2822.61	1928.48	1594.61	1658.85
b0801	hcxB	1636.98	-1.58605	0.142746	-11.111	1.10882e-28	1.87305e-27	2471.07	2461.25	2435.08	818.955	773.169	862.357
b0802	ybiJ	515.654	-0.541781	0.205022	-2.64256	0.00822829	0.0172794	683.261	568.874	581.291	371.679	380.12	508.7
b0803	ybiI	243.443	-1.46392	0.233169	-6.27836	3.42159e-10	1.95164e-09	345.761	346.179	379.596	134.655	97.4004	157.069
b0804	ybiX	115.899	-0.902837	0.236666	-3.81481	0.000136286	0.00039276	149.869	141.427	162.036	78.7456	91.3667	71.9476
b0805	fiu	94.765	-0.468053	0.275982	-1.69596	0.0898942	0.145313	107.386	123.485	98.5816	72.446	66.3702	100.321
b0806	mcbA	349.515	-0.484869	0.175896	-2.75657	0.00584105	0.0127125	424.825	381.008	416.989	274.822	285.306	314.137
b0807	rlmF	221.897	0.186349	0.22732	0.819763	0.412351	0.519222	164.03	203.697	254.952	237.024	239.622	232.056
b0808	ybiO	764.545	-0.105389	0.166055	-0.634662	0.525649	0.629144	829.59	745.13	802.25	692.174	697.318	820.81
b0809	glnQ	882.702	-0.623984	0.231069	-2.70043	0.006925	0.0148003	992.439	1136.69	1083.26	900.063	524.066	659.688
b0810	glnP	520.647	-1.13842	0.185899	-6.12385	9.13421e-10	5.08459e-09	743.444	700.802	703.668	349.631	270.652	355.684
b0811	glnH	8341.96	-3.31795	0.324584	-10.2222	1.57787e-24	2.21406e-23	9167.97	17710	18611.5	1536.33	992.105	2033.79
b0812	dps	150152	-1.00925	0.226664	-4.45262	8.48283e-06	2.94054e-05	250627	185107	166154	88507	88493	122022
b0813	rhtA	44.3018	-0.202398	0.342968	-0.590136	0.555099	0.653443	40.1224	60.1592	41.9255	46.4599	39.6497	37.4938
b0814	ompX	32913.6	1.11614	0.334148	3.34026	0.000837002	0.00215861	10051.8	26805.7	25485	37957.8	53018.6	44162.6
b0815	opgE	95.3053	0.0135143	0.281224	0.0480552	0.961672	0.973077	77.8847	88.6557	117.845	79.5331	108.606	99.3079
b0817	mntR	155.987	-0.812511	0.237669	-3.41866	0.000629298	0.00165402	166.39	193.143	236.822	106.307	125.845	107.415
b0818	ybiR	124.319	-0.95394	0.248171	-3.84388	0.000121105	0.000352015	140.428	150.926	200.562	82.6829	86.195	85.1211
b0819	ldtB	734.49	0.86211	0.193254	4.46103	8.15684e-06	2.83649e-05	614.817	478.108	471.378	855.178	1054.17	933.292
b0820	ybiT	1134.56	1.33131	0.197186	6.75154	1.46288e-11	9.35222e-11	789.467	613.202	533.7	1616.65	1704.94	1549.41
b0821	ybiU	132.832	-1.16852	0.245538	-4.75901	1.94547e-06	7.37868e-06	201.792	203.697	146.173	81.108	86.195	78.0276
b0822	ybiV	126.135	-0.0550249	0.283522	-0.194077	0.846116	0.887967	147.509	138.261	99.7147	95.2822	153.427	122.615
b0823	ybiW	387.136	0.475177	0.184483	2.57572	0.0100033	0.0206652	320.979	296.574	354.667	497.672	417.184	435.739
b0824	ybiY	26.8205	0.592435	0.423376	1.39931	0.161719	0.239552	28.3217	20.0531	15.8637	34.6481	27.5824	34.4538
b0825	fsaA	246.284	-0.167194	0.20731	-0.806494	0.419958	0.526536	254.895	227.972	299.144	256.711	218.073	220.909
b0826	moeB	793.314	-0.283611	0.264489	-1.0723	0.283587	0.385847	626.617	1008.99	977.884	907.15	686.974	552.274
b0827	moeA	1462.37	-0.749834	0.192584	-3.89355	9.87878e-05	0.000290997	1551.79	2020.08	1930.84	1217.41	1124.85	929.238
b0828	iaaA	1487.47	-2.27255	0.797392	-2.84998	0.00437216	0.00983233	5377.58	1016.37	1000.55	562.244	465.453	502.62
b0829	gsiA	2424.61	-1.52548	0.726175	-2.1007	0.0356669	0.0646509	7491.09	1743.56	1562.57	1352.85	1182.6	1215
b0830	gsiB	1860.99	-1.12149	0.388316	-2.88809	0.00387586	0.00880185	4622.34	1491.32	1536.51	1235.52	1158.46	1121.77
b0831	gsiC	227.338	-0.495764	0.424638	-1.1675	0.243009	0.338339	490.909	147.76	159.77	222.85	177.562	165.175
b0832	gsiD	218.544	-0.380824	0.389228	-0.978408	0.327873	0.434919	431.906	159.369	150.705	184.265	213.764	171.255
b0833	pdeI	46.7289	2.29708	0.435756	5.27148	1.35329e-07	5.98554e-07	14.1608	8.4434	24.9287	59.8467	93.9526	79.041
b0834	dgcI	26.3862	1.33367	0.430139	3.10057	0.00193151	0.00465452	18.8811	12.6651	13.5975	39.3728	41.3736	32.4271
b0835	rimO	159.603	1.92997	0.227082	8.49897	1.91273e-17	1.88357e-16	63.7238	71.7689	63.4548	240.962	277.548	240.163
b0836	bssR	1663.11	-0.285459	0.188403	-1.51515	0.129733	0.198949	1530.55	1924.04	2026.02	1431.6	1367.05	1699.38
b0837	yliI	418.652	0.58448	0.256439	2.27922	0.0226542	0.04326	460.228	244.859	300.277	487.436	492.174	526.94
b0838	gstB	1340.84	-0.583941	0.142141	-4.1082	3.98759e-05	0.000124386	1554.15	1619.02	1652.09	1037.87	1066.23	1115.69
b0839	dacC	3965.8	0.307738	0.155591	1.97787	0.0479438	0.0837253	3752.62	3566.28	3314.38	4644.42	3923.6	4593.5
b0840	deoR	551.042	0.920965	0.159142	5.78708	7.16188e-09	3.61136e-08	402.404	363.066	377.329	699.261	727.486	736.703
b0841	ybjG	1058.17	4.63882	0.249715	18.5764	4.98512e-77	3.26786e-75	63.7238	99.21	81.5847	1787.53	2543.62	1773.36
b0842	mdfA	170.206	0.737795	0.243203	3.03366	0.00241608	0.00571429	143.969	125.596	113.312	177.965	257.723	202.669
b0843	ybjH	59.5688	0.508303	0.295227	1.72174	0.0851174	0.138601	40.1224	50.6604	56.6561	70.0836	68.956	70.9342
b0844	ybjI	244.017	0.0668675	0.215558	0.310207	0.756404	0.820693	193.532	279.688	241.355	242.537	240.484	266.51
b0845	ybjJ	173.735	-0.126385	0.22971	-0.550191	0.582188	0.677882	179.371	197.365	167.702	199.226	156.875	141.868
b0846	rcdA	241.874	-1.31998	0.223809	-5.89781	3.68359e-09	1.91233e-08	315.079	336.681	384.128	112.606	162.909	139.842
b0847	ybjL	507.53	0.878506	0.185888	4.726	2.28988e-06	8.5812e-06	304.458	389.452	378.463	673.275	603.365	696.169
b0848	ybjM	165.64	3.78907	0.292074	12.973	1.74108e-38	3.80439e-37	14.1608	23.2194	29.4612	323.645	303.407	299.95
b0849	grxA	84.7412	0.230706	0.39081	0.590328	0.554971	0.653443	35.4021	109.764	88.3835	80.3206	92.2287	102.348
b0850	ybjC	2450.56	-1.09184	0.218293	-5.00175	5.68132e-07	2.32115e-06	2430.95	3559.95	4016.92	1500.1	1642.02	1553.46
b0851	nfsA	5820.2	-1.12766	0.161622	-6.97717	3.01195e-12	2.06051e-11	7076.88	8061.34	8819.08	3934.92	3447.8	3581.16
b0852	rimK	2683.36	-0.712895	0.189536	-3.76125	0.000169063	0.000481222	2728.32	3597.94	3673.58	2239.53	2042.82	1817.94
b0853	ybjN	1519.41	0.786563	0.184559	4.26184	2.02748e-05	6.60096e-05	1043.18	1159.91	1142.19	1640.27	2270.38	1860.5
b0854	potF	533.229	-2.12071	0.2305	-9.2005	3.56282e-20	4.12873e-19	1078.58	825.342	696.87	170.091	208.592	219.896
b0855	potG	167.034	-2.01844	0.243382	-8.29328	1.10168e-16	1.02949e-15	299.738	255.413	249.287	68.5087	77.5755	51.6806
b0856	potH	60.7477	-1.47867	0.305062	-4.84712	1.25269e-06	4.88617e-06	103.846	77.046	87.2503	29.1359	32.7541	34.4538
b0857	potI	50.0038	-0.981543	0.407199	-2.41048	0.0159316	0.0315472	84.9651	62.2701	52.1236	47.2474	18.9629	34.4538
b0858	ybjO	159.927	-0.154747	0.261387	-0.592023	0.553835	0.653005	179.371	165.702	159.77	117.331	138.774	198.616
b0859	rlmC	103.266	0.378436	0.312466	1.21113	0.225846	0.318178	93.2256	65.4364	111.046	103.944	151.703	94.2412
b0860	artJ	243.282	1.07867	0.279824	3.85483	0.000115812	0.000338195	194.712	101.321	173.368	278.76	374.086	337.444
b0861	artM	1214.17	0.755498	0.155383	4.86215	1.16116e-06	4.55749e-06	879.153	910.832	920.095	1474.12	1679.08	1421.72
b0862	artQ	839.992	0.259698	0.156044	1.66427	0.0960592	0.153326	735.184	824.287	734.263	966.209	885.223	894.785
b0863	artI	4968.13	0.110914	0.130118	0.852406	0.393989	0.502147	4761.58	4881.34	4688.86	5246.03	5127.74	5103.21
b0864	artP	2156.68	-0.396419	0.17535	-2.26072	0.0237765	0.0452062	2792.05	2352.54	2208.45	1780.44	1728.21	2078.37
b0865	ybjP	13713.3	-0.813281	0.216352	-3.75906	0.00017055	0.000484824	21896.2	15833.5	14707.9	9545.55	8687.6	11608.9
b0866	ybjQ	984.883	-1.23299	0.187521	-6.57521	4.85839e-11	2.96333e-10	1599	1410.05	1136.52	589.017	569.749	604.968
b0867	amiD	1854.51	-1.35374	0.173396	-7.80723	5.84603e-15	4.88132e-14	3048.12	2584.74	2364.82	1074.88	955.041	1099.48
b0868	ybjS	435.337	0.0640892	0.179849	0.35635	0.721579	0.795017	440.166	416.893	420.388	443.338	499.069	392.165
b0869	ybjT	1292.02	0.108363	0.183331	0.591076	0.554469	0.653313	1443.23	1134.58	1153.52	1432.38	1405.84	1182.57
b0870	ltaE	4657.12	-0.839285	0.16182	-5.18654	2.14242e-07	9.25222e-07	6646.16	5526.21	5752.86	3509.69	3490.04	3017.74
b0871	poxB	50896.1	-1.04777	0.207451	-5.05069	4.40206e-07	1.82223e-06	87982.5	60831.5	57005.1	32701.5	32166.3	34689.9
b0872	hcr	12285.2	6.8551	0.394117	17.3936	9.23242e-68	4.77045e-66	112.107	183.644	335.404	31624.3	13583.5	27872.1
b0873	hcp	28421.2	6.58155	0.853487	7.71137	1.24476e-14	1.01053e-13	189.991	347.235	1224.9	70382.9	31238.8	67143.3
b0874	lysO	56.0984	1.3529	0.346577	3.90362	9.47656e-05	0.000279559	33.042	21.1085	40.7924	75.5958	93.0906	72.9609
b0875	aqpZ	46.3054	-0.0711743	0.315398	-0.225665	0.821462	0.870203	49.563	48.5496	44.1917	40.9477	49.9931	44.5872
b0876	ybjD	856.164	-0.411652	0.152266	-2.70351	0.00686121	0.0146997	1023.12	923.497	985.816	739.422	699.042	766.09
b0877	ybjX	3158.5	3.4277	0.221434	15.4796	4.76729e-54	1.66174e-52	413.025	695.525	501.973	5400.38	6150.88	5789.25
b0878	macA	390.344	-0.995867	0.192346	-5.17748	2.24908e-07	9.66531e-07	531.032	515.047	513.304	263.798	218.935	299.95
b0879	macB	548.139	-1.40009	0.159096	-8.80026	1.36501e-18	1.42741e-17	781.207	819.01	785.253	314.195	303.407	285.764
b0880	cspD	15046.7	-0.500786	0.258529	-1.93706	0.0527385	0.0909055	22835.5	15724.8	14336.3	11328.3	9863.3	16192.3
b0881	clpS	206.001	-0.64537	0.212892	-3.03145	0.00243384	0.00575009	227.754	251.191	275.348	185.052	145.67	150.989
b0882	clpA	31745.7	-1.86853	0.156731	-11.9218	9.10773e-33	1.72419e-31	54216	49665.1	45644.4	13945.9	12381.1	14621.6
b0883	serW	25.3392	0.54742	0.572481	0.956225	0.338959	0.446656	4.72028	27.4411	29.4612	27.561	34.478	28.3737
b0884	infA	1243.67	2.51923	0.277665	9.07292	1.15866e-19	1.29818e-18	237.194	472.83	397.726	1834.77	2619.47	1900.02
b0885	aat	180.952	0.352658	0.207057	1.70319	0.0885328	0.143455	180.551	142.482	154.105	205.526	203.42	199.629
b0886	cydC	547.314	0.729045	0.2277	3.20178	0.00136584	0.00340258	317.439	440.112	478.177	718.16	764.55	565.447
b0887	cydD	509.096	1.16675	0.170003	6.86312	6.73722e-12	4.46303e-11	344.581	312.406	284.413	705.561	686.112	721.502
b0888	trxB	1392.92	1.20987	0.1919	6.30467	2.88812e-10	1.65165e-09	687.981	991.044	843.042	2100.93	1855.78	1878.74
b0889	lrp	1435.84	0.160522	0.151765	1.0577	0.290191	0.392996	1458.57	1308.73	1300.82	1418.21	1589.44	1539.27
b0890	ftsK	7223.53	-0.168107	0.128709	-1.3061	0.191518	0.276602	7649.22	7615.95	7666.7	6772.91	6964.56	6671.87
b0891	lolA	1433.39	-0.0406525	0.150237	-0.270589	0.786707	0.844385	1374.78	1487.09	1499.12	1436.32	1493.76	1309.24
b0892	rarA	897.108	-0.219376	0.163501	-1.34174	0.179679	0.262002	1029.02	912.943	954.088	817.38	910.22	758.996
b0893	serS	10876.5	0.603235	0.182002	3.31443	0.000918289	0.00235305	7504.07	8960.56	9441.17	14651.4	13497.3	11204.6
b0894	dmsA	8981	3.0386	0.197028	15.4222	1.16052e-53	3.98202e-52	1742.96	1733.01	2370.49	16344.4	14044.6	17650.5
b0895	dmsB	1357.94	4.01549	0.298794	13.439	3.57329e-41	8.76755e-40	119.187	112.93	242.488	2851.38	2162.63	2659.02
b0896	dmsC	1165.07	3.8645	0.260691	14.8241	1.02381e-49	3.1666e-48	126.268	122.429	200.562	2715.94	1829.92	1995.28
b0897	ycaC	7191.74	0.0691088	0.221325	0.312251	0.75485	0.819978	7151.23	7269.77	6636.69	6135.86	6226.73	9730.15
b0898	ycaD	83.8438	1.49788	0.330802	4.52803	5.95358e-06	2.11331e-05	27.1416	45.3833	58.9223	121.268	143.946	106.401
b0899	ycaM	61.1087	0.934699	0.351921	2.65599	0.00790767	0.0166898	53.1032	44.3279	28.328	62.9965	77.5755	100.321
b0900	ycaN	49.4661	0.457314	0.341825	1.33786	0.180942	0.263494	49.563	39.0507	36.2599	45.6725	54.3029	71.9476
b0901	ycaK	24.227	1.48161	0.667894	2.21833	0.026532	0.0498412	2.36014	23.2194	12.4643	34.6481	18.9629	53.7073
b0902	pflA	2693.92	1.40127	0.192654	7.27353	3.50215e-13	2.58078e-12	1483.35	1534.59	1420.93	3404.17	4812.27	3508.2
b0903	pflB	167931	3.75791	0.1825	20.5913	3.28422e-94	3.2054e-92	19278.8	24317	25757	302282	349692	286258
b0904	focA	6564.51	4.44711	0.194834	22.8251	2.58238e-115	4.36224e-113	672.64	515.047	539.366	10747.2	14380.8	12532
b0905	ycaO	243.421	2.00322	0.210997	9.4941	2.22117e-21	2.71738e-20	97.9459	89.7111	104.247	427.589	396.497	344.538
b0906	ycaP	400.027	0.597973	0.237365	2.51921	0.0117617	0.0238934	401.224	299.741	253.819	408.69	484.416	552.274
b0907	serC	2267.7	0.794261	0.138172	5.74834	9.01224e-09	4.48773e-08	1611.98	1676.02	1688.35	2846.66	3005.62	2777.58
b0908	aroA	498.422	1.47808	0.176903	8.35531	6.52596e-17	6.2039e-16	274.956	234.304	281.014	701.624	785.237	713.396
b0909	ycaL	70.3677	-0.575229	0.312127	-1.84293	0.065339	0.110034	94.4056	92.8774	65.721	70.8711	51.717	46.6139
b0910	cmk	1662.35	1.67862	0.249807	6.71965	1.82166e-11	1.15284e-10	1030.2	701.858	642.48	2207.24	3177.15	2215.17
b0911	rpsA	20774.3	2.00361	0.186931	10.7184	8.34111e-27	1.30371e-25	8621.6	8142.61	8115.42	32604.6	39871.2	27290.4
b0912	ihfB	6537.97	-0.0435489	0.196629	-0.221478	0.82472	0.872098	8048.08	6170.02	5691.67	5694.89	6520.65	7102.54
b0913	ycaI	185.492	-0.695475	0.218116	-3.18856	0.00142983	0.0035459	256.075	216.362	215.293	136.23	125.845	163.149
b0914	msbA	1041	0.889523	0.171634	5.18266	2.18738e-07	9.4186e-07	739.904	777.848	671.941	1316.63	1519.62	1220.07
b0915	lpxK	253.94	0.433629	0.223379	1.94123	0.0522308	0.0902429	234.834	227.972	185.832	326.007	312.888	236.11
b0916	ycaQ	133.711	0.230119	0.270771	0.849866	0.3954	0.503069	95.5857	148.815	124.643	130.718	175.838	126.668
b0917	ycaR	131.634	-1.23057	0.392513	-3.13511	0.00171792	0.00417087	126.268	186.81	241.355	121.268	71.5419	42.5605
b0918	kdsB	1542.1	-0.23784	0.161063	-1.47669	0.13976	0.211809	1551.79	1764.67	1690.62	1574.91	1336.02	1334.58
b0919	ycbJ	2948.4	0.690815	0.144803	4.77072	1.83566e-06	6.98632e-06	2160.71	2340.93	2265.11	3765.62	3365.05	3792.95
b0920	elyC	116.349	0.318152	0.314303	1.01224	0.311421	0.415859	77.8847	84.434	148.439	145.679	106.882	134.775
b0921	cmoM	472.426	-0.148102	0.203481	-0.727844	0.466709	0.572886	509.791	529.823	450.982	529.171	443.904	370.885
b0922	mukF	711.555	0.334659	0.175646	1.90531	0.0567404	0.0968911	569.974	684.971	633.415	855.965	819.715	705.289
b0923	mukE	510.771	0.307627	0.18485	1.6642	0.0960732	0.153326	417.745	505.549	446.45	631.54	557.682	505.66
b0924	mukB	4411.67	0.298928	0.17289	1.729	0.0838087	0.136767	3679.46	3991.62	4198.21	5578.34	4820.03	4202.35
b0925	ldtD	6286.68	-0.797291	0.247762	-3.21797	0.00129101	0.00322899	10975.8	6516.2	6450.86	4851.52	3974.45	4951.21
b0926	mepK	1647.48	0.809975	0.212152	3.8179	0.000134592	0.000388645	1488.07	1072.31	1030.01	1833.2	2073.85	2387.44
b0927	gloC	967.432	0.860932	0.145182	5.93001	3.02915e-09	1.58193e-08	683.261	674.417	703.668	1285.92	1246.38	1210.95
b0928	aspC	6818.82	0.782393	0.208427	3.75379	0.000174178	0.00049418	3884.79	5625.42	5530.77	8574.61	7531.72	9765.62
b0929	ompF	1019.32	-0.78114	0.238039	-3.28157	0.00103232	0.00262229	957.037	1482.87	1425.47	699.261	641.291	909.985
b0930	asnS	3650.36	0.582949	0.174146	3.34748	0.000815504	0.00210936	2661.06	3128.28	2978.98	4366.45	4973.45	3793.97
b0931	pncB	1108.5	0.689177	0.151424	4.55132	5.33114e-06	1.9145e-05	875.612	857.005	813.581	1354.43	1464.45	1285.94
b0932	pepN	14967.8	-1.22359	0.134995	-9.06403	1.25722e-19	1.3979e-18	21495	21203.5	20182	9398.29	8550.55	8977.23
b0933	ssuB	106.173	-1.62043	0.316547	-5.11908	3.07031e-07	1.29537e-06	116.827	149.87	214.16	48.8223	63.7843	43.5739
b0934	ssuC	12.6767	-0.0863327	0.790976	-0.109147	0.913086	0.937675	28.3217	6.33255	4.53249	12.5993	6.03365	18.2402
b0935	ssuD	36.3275	-0.68953	0.395588	-1.74305	0.0813245	0.133325	61.3637	37.9953	35.1268	22.0488	31.0302	30.4004
b0936	ssuA	12.2861	-0.85304	0.889573	-0.958932	0.337593	0.445258	38.9423	6.33255	2.26624	9.44948	8.6195	8.10677
b0937	ssuE	14.1904	-1.26286	0.823704	-1.53315	0.125239	0.192701	44.8427	8.4434	6.79873	9.44948	3.4478	12.1602
b0938	elfA	109.401	0.627499	0.317156	1.97852	0.0478702	0.08363	92.0455	92.8774	72.5198	95.2822	117.225	186.456
b0939	elfD	10.3431	-0.0360603	0.76528	-0.0471205	0.962417	0.973276	11.8007	13.7205	5.66561	3.14983	9.48145	18.2402
b0940	elfC	46.727	0.191531	0.36964	0.518156	0.604349	0.697766	34.222	41.1616	55.5229	61.4216	35.34	52.694
b0941	elfG	46.4918	-0.292099	0.359027	-0.813586	0.415882	0.522619	41.3025	66.4918	45.3249	37.7979	35.34	52.694
b0942	ycbU	5.40979	-0.680337	1.12064	-0.607098	0.543786	0.64427	0	6.33255	13.5975	4.72474	1.7239	6.08008
b0943	ycbV	15.2495	-0.396098	0.634662	-0.624108	0.532556	0.635422	11.8007	9.49883	30.5943	7.87456	15.5151	16.2135
b0944	ycbF	195.682	-0.466424	0.24449	-1.90774	0.0564245	0.0963891	169.93	249.08	261.751	145.679	178.424	169.229
b0945	pyrD	598.122	4.48661	0.306955	14.6165	2.2044e-48	6.67706e-47	49.563	54.8821	48.7242	891.401	1663.56	880.598
b0946	zapC	466.306	0.156841	0.18416	0.851657	0.394404	0.502385	422.465	490.773	409.057	437.826	501.655	536.06
b0947	ycbX	480.491	0.208744	0.179923	1.16018	0.245974	0.341656	509.791	408.45	419.255	511.847	490.45	543.153
b0948	rlmL	704.953	1.64475	0.190468	8.63531	5.85678e-18	5.89977e-17	391.783	320.849	312.741	1051.25	1201.56	951.532
b0949	uup	936.918	0.802145	0.160321	5.00335	5.63418e-07	2.30403e-06	698.602	714.523	635.681	1122.13	1296.37	1154.2
b0950	pqiA	394.804	0.0169367	0.191159	0.0886002	0.9294	0.950168	448.427	354.623	375.063	421.289	413.736	355.684
b0951	pqiB	616.743	0.680579	0.160474	4.24106	2.2247e-05	7.18974e-05	460.228	489.717	471.378	744.934	715.419	818.784
b0952	pqiC	166.464	0.684578	0.216827	3.15726	0.00159261	0.00391169	139.248	113.986	130.309	225.213	202.558	187.469
b0953	rmf	22515.8	-0.605342	0.216242	-2.79938	0.00512014	0.0113117	33202.5	24437.3	23873.7	15376.7	16533.9	21670.4
b0954	fabA	838.426	-0.162034	0.160333	-1.01061	0.312203	0.416651	885.053	849.617	922.361	850.453	807.647	715.422
b0955	ycbZ	2398.35	-0.122156	0.140309	-0.870624	0.38396	0.492078	2564.29	2544.63	2390.89	2419.07	2247.97	2223.28
b0956	matP	331.111	-0.789728	0.242	-3.26334	0.00110109	0.0027857	304.458	481.274	472.512	213.401	269.79	245.23
b0957	ompA	181500	1.29146	0.176785	7.30525	2.76743e-13	2.05157e-12	86829.6	117757	111270	259743	271816	241583
b0958	sulA	1032.67	-0.981326	0.177683	-5.52292	3.33419e-08	1.57799e-07	1348.82	1393.16	1369.94	660.676	607.675	815.744
b0959	sxy	251.497	-0.612317	0.233206	-2.62566	0.00864824	0.0180758	291.477	336.681	283.28	151.979	209.454	236.11
b0960	yccS	648.678	0.264001	0.18078	1.46034	0.144197	0.21741	564.074	594.204	610.752	807.93	705.075	610.034
b0961	yccF	104.142	0.831619	0.263755	3.153	0.00161602	0.00395848	86.1452	73.8798	64.5879	112.606	133.602	154.029
b0962	helD	1668.5	-0.508335	0.155436	-3.27039	0.00107401	0.00271875	2026.18	1955.7	1896.85	1522.15	1259.31	1350.79
b0963	mgsA	5441	0.21413	0.178979	1.1964	0.231542	0.324588	4281.3	5891.38	4940.41	5568.1	5693.18	6271.6
b0964	yccT	153.908	-1.67392	0.257412	-6.50287	7.88029e-11	4.71529e-10	291.477	215.307	196.03	69.2962	67.2321	84.1077
b0965	yccU	2380.33	-0.0591536	0.161955	-0.365247	0.714927	0.790125	2347.16	2441.2	2499.67	2644.28	2259.17	2090.53
b0966	hspQ	2362.07	-1.17902	0.201815	-5.84208	5.15521e-09	2.62056e-08	4006.34	3136.72	2687.76	1542.63	1303.27	1495.7
b0967	rlmI	257.489	0.678873	0.230852	2.94072	0.00327449	0.00755732	243.095	183.644	167.702	311.833	362.019	276.643
b0968	yccX	290.304	-0.598797	0.194773	-3.07433	0.00210979	0.00504695	337.5	386.286	325.206	250.411	204.282	238.136
b0969	tusE	185.744	0.2682	0.273045	0.982253	0.325975	0.432533	204.152	156.203	145.04	144.892	236.174	228.003
b0970	yccA	8543.87	0.150968	0.207662	0.72699	0.467232	0.573152	10017.6	7402.75	6871.25	8394.29	8211.8	10365.5
b0971	serT	10.7224	0.694351	0.715287	0.97073	0.331683	0.439177	7.08042	10.5543	6.79873	4.72474	18.9629	16.2135
b0972	hyaA	2279.22	0.465917	0.19732	2.36122	0.0182148	0.0355238	2291.7	1691.85	1759.74	2775.78	2265.21	2891.08
b0973	hyaB	2836.53	0.404511	0.243462	1.66149	0.0966144	0.154022	3321.9	2053.86	1948.97	3471.9	2817.72	3404.84
b0974	hyaC	358.869	0.478216	0.287156	1.66535	0.095842	0.153151	427.186	223.75	249.287	482.711	339.608	430.672
b0975	hyaD	431.936	0.227794	0.215463	1.05723	0.290406	0.393055	489.729	393.674	310.475	465.387	461.143	471.206
b0976	hyaE	208.572	0.352497	0.320518	1.09977	0.27143	0.372073	277.317	145.649	126.91	248.049	193.077	260.43
b0977	hyaF	529.387	0.666906	0.28512	2.33904	0.0193335	0.0374725	608.916	319.794	299.144	635.477	642.153	670.835
b0978	appC	1063.64	1.99714	0.229689	8.69499	3.46865e-18	3.51832e-17	568.794	340.902	369.398	1784.38	1698.04	1620.34
b0979	appB	395.071	1.68084	0.231424	7.26304	3.78496e-13	2.78451e-12	241.914	163.591	158.637	678.787	573.197	554.3
b0980	appA	516.552	0.826281	0.195761	4.22086	2.43371e-05	7.81921e-05	449.607	326.126	342.203	648.077	636.119	697.182
b0981	etk	613.839	-0.302502	0.165706	-1.82554	0.0679202	0.113901	644.319	679.694	709.334	496.098	568.887	584.701
b0982	etp	17.454	-0.479811	0.583652	-0.822084	0.411029	0.518152	16.521	10.5543	33.9936	18.1115	10.3434	15.2002
b0983	gfcE	39.5096	-0.694488	0.435813	-1.59354	0.111038	0.173799	57.8235	36.9399	52.1236	29.1359	44.8214	16.2135
b0984	gfcD	72.4303	-0.900329	0.289927	-3.10536	0.00190047	0.00458871	75.5245	93.9328	113.312	48.8223	48.2692	54.7207
b0985	gfcC	8.63078	-0.102971	0.764999	-0.134603	0.892926	0.921963	11.8007	12.6651	2.26624	6.29965	8.6195	10.1335
b0986	gfcB	4.7277	-0.533069	1.15535	-0.461391	0.644518	0.733589	7.08042	5.27713	4.53249	9.44948	0	2.02669
b0987	gfcA	37.2208	0.489208	0.365616	1.33804	0.180884	0.263494	30.6818	34.829	27.1949	33.8606	49.1312	47.6273
b0988	insB4	252.963	-0.67068	0.222856	-3.00947	0.00261702	0.0061465	239.554	354.623	337.67	188.202	199.111	198.616
b0989	cspH	2.48934	0.722526	1.28251	0.563367	0.573185	0.67037	1.18007	2.11085	2.26624	1.57491	1.7239	6.08008
b0990	cspG	82.5208	-0.784294	0.34161	-2.29587	0.0216831	0.0416043	75.5245	102.376	134.841	41.7352	64.6463	76.0009
b0991	ymcE	0.262485	1.37038	4.05158	0.338233	0.735188	NA	0	0	0	1.57491	0	0
b0992	yccM	1002.69	5.56372	0.257616	21.5969	1.91951e-103	2.3418e-101	34.222	33.7736	56.6561	1778.86	1820.44	2292.19
b0993	torS	216.179	-0.0483078	0.251211	-0.1923	0.847507	0.888507	162.85	233.249	262.884	179.54	233.589	224.963
b0994	torT	165.266	-0.873916	0.245662	-3.55739	0.000374555	0.00101797	179.371	242.748	219.826	140.167	111.192	98.2946
b0995	torR	127.94	-0.81181	0.225407	-3.60153	0.000316344	0.000867823	171.11	155.148	163.169	95.2822	100.848	82.081
b0996	torC	22.4573	-0.323909	0.5217	-0.620873	0.534683	0.636878	18.8811	40.1062	15.8637	25.9861	14.6532	19.2536
b0997	torA	85.7654	-0.722181	0.341136	-2.11699	0.0342607	0.062437	107.386	126.651	86.1172	75.5958	38.7878	80.0543
b0998	torD	2033.52	-1.03719	0.20535	-5.05083	4.3989e-07	1.82223e-06	2964.34	2699.78	2539.32	1472.54	1016.24	1508.87
b0999	cbpM	3950.07	-0.70264	0.244304	-2.87609	0.00402634	0.00911833	4682.52	5391.11	4607.27	4138.08	2410.88	2470.54
b1000	cbpA	50161	-0.684534	0.181588	-3.76971	0.000163436	0.000466112	69245.4	59367.7	56915.6	41104.4	32112.8	42220
b1001	yccE	31.4402	0.632487	0.468316	1.35055	0.176838	0.258805	25.9616	29.5519	18.1299	22.0488	36.2019	56.7474
b1002	agp	11644.2	-1.39821	0.181984	-7.68315	1.5522e-14	1.24858e-13	18559	15869.4	16220.6	6927.25	5265.65	7023.5
b1003	yccJ	2088.7	0.84341	0.22639	3.72547	0.000194952	0.000548864	1148.21	1450.15	1886.65	3090.77	2462.59	2493.84
b1004	wrbA	27879.3	0.530106	0.138431	3.82939	0.000128459	0.000372404	24107.7	21945.5	22389.3	32418.8	31593.1	34821.6
b1006	rutG	132.377	-0.818391	0.218524	-3.74509	0.00018033	0.000510314	180.551	167.813	158.637	100.794	92.2287	94.2412
b1007	rutF	17.781	-0.51696	0.478492	-1.08039	0.279967	0.381631	18.8811	18.9977	24.9287	15.7491	12.9293	15.2002
b1008	rutE	13.2335	-0.70608	0.558624	-1.26396	0.206243	0.29448	14.1608	17.9422	16.9968	7.08711	12.0673	11.1468
b1009	rutD	19.2545	-1.67415	0.532286	-3.1452	0.00165971	0.00404744	17.7011	33.7736	36.2599	7.87456	7.75755	12.1602
b1010	rutC	7.10839	-1.15571	0.858019	-1.34695	0.177996	0.260144	3.54021	18.9977	6.79873	3.93728	4.30975	5.06673
b1011	rutB	10.8784	-2.17932	0.817499	-2.66584	0.0076796	0.0162705	9.44056	30.6073	13.5975	7.87456	1.7239	2.02669
b1012	rutA	19.0283	-1.99656	0.57355	-3.48106	0.000499426	0.00132697	28.3217	31.6628	31.7274	11.8118	8.6195	2.02669
b1013	rutR	184.942	-0.938863	0.261187	-3.5946	0.000324896	0.000888508	172.29	268.078	288.946	140.955	119.811	119.575
b1014	putA	7600.42	-3.1677	0.342074	-9.26026	2.03939e-20	2.39492e-19	22338.7	10210.2	8487.08	1739.49	1212.76	1614.26
b1015	putP	1225.81	-3.63494	0.235053	-15.4643	6.04217e-54	2.08954e-52	2915.95	2174.18	1716.68	187.415	168.08	192.536
b1018	efeO	52.0652	-0.352465	0.386504	-0.91193	0.361806	0.469994	73.1644	65.4364	36.2599	33.0732	45.6834	58.7741
b1019	efeB	146.999	-2.91049	0.265074	-10.9799	4.77424e-28	7.91262e-27	225.393	283.909	269.683	37.0105	39.6497	26.347
b1020	phoH	1807.01	-4.76935	0.240807	-19.8057	2.65995e-87	2.24663e-85	3691.26	3816.42	2949.51	93.7073	124.983	166.189
b1021	pgaD	36.4567	0.402916	0.49764	0.809653	0.418139	0.524705	17.7011	25.3302	50.9905	40.9477	24.9966	58.7741
b1022	pgaC	57.4126	1.15832	0.361923	3.20046	0.00137207	0.00341616	48.3829	23.2194	35.1268	73.2334	67.2321	97.2812
b1023	pgaB	142.631	1.62598	0.443337	3.6676	0.000244836	0.000682308	102.666	74.9352	31.7274	180.328	132.74	333.391
b1024	pgaA	670.156	1.02491	0.318152	3.22146	0.00127541	0.0031936	574.694	368.343	381.862	898.488	543.029	1254.52
b1025	dgcT	213.921	0.774949	0.323342	2.39669	0.016544	0.0325689	143.969	165.702	163.169	181.902	216.35	412.432
b1026	insF4	2.04623	-2.51518	1.65558	-1.51921	0.128709	0.197584	7.08042	1.05543	2.26624	0	0.86195	1.01335
b1027	insE4	0.175904	-1.30743	4.08047	-0.320411	0.748657	NA	0	1.05543	0	0	0	0
b1028	ymdE	1.27288	-3.97567	2.3874	-1.66527	0.0958586	0.153151	2.36014	5.27713	0	0	0	0
b1029	ycdU	9.55098	0.424078	0.658471	0.644034	0.519553	0.624488	4.72028	10.5543	9.06497	9.44948	10.3434	13.1735
b1032	serX	7.73303	-0.159043	1.00138	-0.158823	0.873808	0.907849	0	6.33255	18.1299	5.5122	10.3434	6.08008
b1033	ghrA	1211.43	-0.680957	0.149865	-4.54381	5.52465e-06	1.97914e-05	1423.17	1569.42	1483.26	910.3	890.395	992.066
b1034	ycdX	711.669	-0.117744	0.178476	-0.659715	0.509437	0.615359	641.958	824.287	755.792	687.449	729.21	631.315
b1035	ycdY	361.854	1.02999	0.280235	3.67546	0.000237418	0.0006629	174.65	281.799	257.219	495.31	614.571	347.578
b1036	ycdZ	283.483	0.00159145	0.224207	0.00709812	0.994337	0.995243	226.574	291.297	332.005	261.436	324.093	265.497
b1037	csgG	44.8818	-0.255457	0.331395	-0.770854	0.440793	0.545803	46.0228	48.5496	52.1236	49.6098	34.478	38.5071
b1038	csgF	2.06982	4.31056	1.88769	2.2835	0.0224007	0.0428687	0	0	0	1.57491	1.7239	9.12011
b1039	csgE	0.615238	1.07587	2.68215	0.401121	0.688331	NA	1.18007	0	0	0.787456	1.7239	0
b1040	csgD	10.72	1.11399	0.703549	1.58338	0.113335	0.176827	7.08042	6.33255	6.79873	6.29965	15.5151	22.2936
b1041	csgB	8.79142	-0.610247	0.725642	-0.840975	0.400362	0.507902	7.08042	17.9422	6.79873	8.66202	5.1717	7.09342
b1042	csgA	89.6153	-0.741719	0.291717	-2.5426	0.0110032	0.022519	107.386	107.653	121.244	74.8084	46.5453	80.0543
b1043	csgC	1.80782	3.01832	2.01714	1.49634	0.134566	0.205398	0	1.05543	0	4.72474	0	5.06673
b1044	ymdA	5.23016	0.411353	0.908772	0.452647	0.650803	0.738395	7.08042	4.2217	2.26624	9.44948	4.30975	4.05338
b1045	ymdB	1232.29	-0.781647	0.242433	-3.22417	0.00126337	0.00316709	1912.89	1419.55	1341.62	864.627	705.937	1149.13
b1046	clsC	1209.63	-0.462833	0.225477	-2.05268	0.0401032	0.0717448	1824.39	1171.52	1210.17	1002.43	921.425	1127.85
b1047	opgC	51.3501	0.522028	0.355638	1.46786	0.142142	0.214679	37.7623	47.4941	40.7924	42.5226	59.4746	80.0543
b1048	opgG	3579.25	0.328472	0.150153	2.18759	0.0286996	0.0533426	3406.86	2980.52	3133.08	3704.98	3996	4254.03
b1049	opgH	2805.95	1.04267	0.151871	6.86551	6.6254e-12	4.39558e-11	1925.88	1796.33	1780.13	4019.97	3905.5	3407.88
b1050	yceK	3324.78	-0.0155828	0.231038	-0.0674469	0.946226	0.961329	4340.3	3007.96	2679.83	3092.34	2969.42	3858.82
b1051	msyB	4522.37	-0.383569	0.215135	-1.78292	0.0745991	0.123451	6313.38	4605.88	4440.7	3952.24	3271.1	4550.94
b1053	mdtG	630.061	-0.243773	0.179525	-1.35788	0.174502	0.255811	667.92	651.197	729.73	522.871	543.891	664.755
b1054	lpxL	1049.59	-0.220713	0.148136	-1.48993	0.136242	0.207338	1170.63	1075.48	1143.32	1013.46	924.873	969.772
b1055	trhO	69.8021	-0.108421	0.284302	-0.381357	0.702938	0.781596	63.7238	86.5449	66.8542	72.446	60.3365	68.9075
b1056	yceI	93.7538	-0.874118	0.324826	-2.69103	0.00712313	0.0151721	96.7658	119.263	147.306	44.0976	68.956	86.1344
b1057	yceJ	13.0566	0.193789	0.700187	0.276768	0.781958	0.840931	3.54021	12.6651	20.3962	21.2613	10.3434	10.1335
b1058	yceO	0.959755	-0.413399	2.08535	-0.19824	0.842858	NA	0	1.05543	2.26624	1.57491	0.86195	0
b1059	solA	699.905	1.10747	0.181797	6.09178	1.11659e-09	6.15315e-09	395.324	445.389	490.642	1052.04	962.799	853.237
b1060	bssS	14271	-0.703263	0.34396	-2.04461	0.0408936	0.0729507	25825.8	14792.8	12426.9	7295	9228.04	16057.5
b1061	dinI	196.284	0.422553	0.264397	1.59817	0.110004	0.172365	115.647	172.034	215.293	208.676	237.036	229.016
b1062	pyrC	1220.97	3.60822	0.193798	18.6185	2.27657e-77	1.51495e-75	165.21	182.589	207.361	2402.53	2442.77	1925.36
b1063	yceB	724.585	0.913533	0.199356	4.58242	4.59631e-06	1.66285e-05	428.366	524.546	554.096	866.202	863.674	1110.63
b1064	grxB	16924.3	-0.91535	0.216032	-4.23709	2.26431e-05	7.31239e-05	26210.5	19774.4	20374.7	10726.7	9871.06	14588.1
b1065	mdtH	59.0355	-0.00487815	0.29411	-0.0165861	0.986767	0.989922	61.3637	52.7713	63.4548	56.6969	67.2321	52.694
b1066	rimJ	693.861	-0.723341	0.196747	-3.6765	0.000236452	0.000661043	1029.02	788.403	775.055	496.098	487.864	586.727
b1067	yceH	959.479	-0.960251	0.171099	-5.61227	1.99691e-08	9.61671e-08	1167.09	1292.9	1342.75	726.822	581.816	645.501
b1068	yceM	1272.68	-0.908704	0.149971	-6.05918	1.36819e-09	7.43699e-09	1744.14	1698.18	1539.91	910.3	844.711	898.838
b1069	murJ	182.544	0.601097	0.233231	2.57727	0.00995852	0.0205825	122.727	178.367	133.708	206.314	241.346	212.803
b1070	flgN	48.4955	-0.737802	0.333645	-2.21133	0.0270127	0.0507224	71.9843	47.4941	62.3217	32.2857	35.34	41.5472
b1071	flgM	89.2448	-1.27195	0.259991	-4.89231	9.96605e-07	3.94688e-06	134.528	134.039	109.913	51.9721	48.2692	56.7474
b1072	flgA	74.9601	-0.518512	0.267793	-1.93624	0.0528383	0.0910419	87.3252	80.2123	97.4484	66.9338	56.0268	61.8141
b1073	flgB	35.3271	1.34715	0.432803	3.11261	0.00185439	0.00448238	11.8007	29.5519	18.1299	40.1603	58.6126	53.7073
b1074	flgC	12.8532	1.51398	0.837417	1.80792	0.0706189	0.117707	0	5.27713	14.7306	27.561	16.3771	13.1735
b1075	flgD	61.8927	0.692061	0.331199	2.08956	0.0366573	0.0663092	35.4021	62.2701	44.1917	78.7456	87.9189	62.8275
b1076	flgE	121.865	0.865293	0.310712	2.78487	0.00535498	0.0117654	50.743	115.041	92.916	152.767	158.599	161.122
b1077	flgF	49.5037	0.777162	0.380582	2.04204	0.0411479	0.0733746	21.2413	34.829	53.2567	57.4843	66.3702	63.8408
b1078	flgG	87.2416	1.04629	0.350081	2.98871	0.00280156	0.00654841	29.5018	70.7135	70.2535	126.78	102.572	123.628
b1079	flgH	17.4961	0.582279	0.549978	1.05873	0.289723	0.392614	11.8007	18.9977	11.3312	30.7108	18.9629	13.1735
b1080	flgI	30.5959	0.507868	0.499682	1.01638	0.309447	0.4136	14.1608	44.3279	16.9968	36.223	29.3063	42.5605
b1081	flgJ	22.2138	-0.0291567	0.475808	-0.0612781	0.951138	0.965573	25.9616	18.9977	22.6624	31.4983	18.9629	15.2002
b1082	flgK	102.529	-0.11672	0.260018	-0.448893	0.653509	0.739745	100.306	115.041	104.247	96.8571	80.1614	118.561
b1083	flgL	126.569	-0.0932047	0.239184	-0.389678	0.696774	0.776512	149.869	112.93	129.176	107.882	131.878	127.682
b1084	rne	6856.56	0.661186	0.180624	3.66057	0.000251652	0.000699798	6285.06	4762.08	4890.55	9193.55	8219.56	7788.58
b1085	yceQ	885.807	-0.347346	0.180272	-1.92679	0.0540062	0.0927994	1098.65	947.772	929.16	673.275	859.364	806.623
b1086	rluC	379.852	1.51806	0.214813	7.0669	1.58436e-12	1.11873e-11	187.631	180.478	222.092	607.129	625.776	456.006
b1087	yceF	488.786	0.657712	0.190131	3.45925	0.000541674	0.00143229	441.346	374.676	321.806	567.756	605.951	621.181
b1088	yceD	3001.1	1.31787	0.208371	6.3246	2.53887e-10	1.45952e-09	1453.85	1887.1	1814.13	4458.58	4988.11	3404.84
b1089	rpmF	4988.63	1.38108	0.287506	4.80366	1.55793e-06	6.00738e-06	1647.38	3371.03	3284.92	6674.48	8746.21	6207.76
b1090	plsX	1326.04	1.03738	0.194448	5.33501	9.55394e-08	4.29927e-07	1026.66	806.345	773.922	1689.88	2041.1	1618.31
b1091	fabH	1875.76	0.763246	0.196243	3.88928	0.000100541	0.000295566	1543.53	1311.89	1317.82	2574.2	2626.36	1880.77
b1092	fabD	3889.7	1.02509	0.151556	6.76374	1.34471e-11	8.6598e-11	2793.23	2423.26	2473.6	5394.08	5423.39	4830.62
b1093	fabG	10326.6	0.808121	0.167931	4.81224	1.49251e-06	5.79136e-06	8043.36	7525.18	6955.1	13503.3	14590.2	11342.4
b1094	acpP	11205.8	0.204897	0.154247	1.32837	0.184055	0.267052	9332	11045	10856.4	11136.2	12169.9	12695.2
b1095	fabF	7545.78	1.47694	0.155591	9.49245	2.2567e-21	2.74555e-20	3930.82	4212.2	3823.15	11227.6	12172.5	9908.5
b1096	pabC	311.137	-0.425769	0.196674	-2.16484	0.0303996	0.0561459	345.761	379.953	344.469	299.233	225.831	271.577
b1097	mltG	150.8	-0.349795	0.25019	-1.39811	0.162079	0.240003	156.949	179.422	171.101	146.467	152.565	98.2946
b1098	tmk	418.428	-0.24767	0.178259	-1.38938	0.164716	0.24317	444.887	506.604	411.323	391.366	395.635	360.751
b1099	holB	423.385	0.262288	0.216181	1.21328	0.225024	0.317477	346.941	423.225	385.261	542.557	477.52	364.805
b1100	ycfH	1735.42	-0.792436	0.185279	-4.27699	1.8944e-05	6.19647e-05	2628.02	1956.76	2016.96	1275.68	1357.57	1177.51
b1101	ptsG	4695.19	1.61772	0.310598	5.20841	1.90464e-07	8.26599e-07	2062.76	2559.41	2301.37	5825.6	10962.3	4459.74
b1102	fhuE	120.845	-0.830746	0.228636	-3.63349	0.000279618	0.000770923	155.769	149.87	158.637	96.0697	77.5755	87.1478
b1103	hinT	2345.47	-0.221901	0.193013	-1.14967	0.25028	0.346979	3102.41	2268.11	2206.19	2037.94	2293.65	2164.51
b1104	ycfL	1450.28	-0.148813	0.166268	-0.895019	0.370777	0.479097	1693.4	1419.55	1462.86	1501.68	1363.61	1260.6
b1105	lpoB	2399.89	0.0874129	0.178821	0.488828	0.624963	0.716107	2753.1	2104.52	2124.6	2658.45	2394.5	2364.14
b1106	thiK	297.866	0.952066	0.185185	5.14115	2.7306e-07	1.15984e-06	223.033	184.699	201.696	407.902	393.911	375.951
b1107	nagZ	1331.8	0.729724	0.167083	4.36744	1.25711e-05	4.24056e-05	931.076	1041.7	1033.41	1747.37	1785.1	1452.12
b1108	ycfP	2328.16	-0.088793	0.135348	-0.656034	0.511802	0.617877	2363.68	2459.14	2376.16	2189.92	2257.45	2322.59
b1109	ndh	784.268	2.07212	0.228932	9.05125	1.4134e-19	1.56758e-18	287.937	309.24	307.076	1489.08	1397.22	915.051
b1110	ycfJ	42.6739	-0.161987	0.340405	-0.475864	0.634171	0.724201	53.1032	41.1616	40.7924	33.8606	40.5117	46.6139
b1111	comR	372.486	-0.64338	0.204047	-3.1531	0.00161548	0.00395848	448.427	508.715	405.657	281.909	337.885	252.323
b1112	bhsA	100.245	-1.29588	0.293864	-4.40979	1.03472e-05	3.53656e-05	191.171	113.986	122.377	58.2718	56.8887	58.7741
b1113	ldtC	211.049	0.5853	0.293723	1.99269	0.0462953	0.0812217	244.275	144.593	117.845	230.725	277.548	251.31
b1114	mfd	3569.69	0.0628748	0.165841	0.379128	0.704593	0.783238	3638.16	3701.38	3136.48	4077.45	3333.16	3531.51
b1115	ycfT	24.7396	-0.613636	0.419802	-1.46173	0.143816	0.216909	27.1416	29.5519	32.8605	17.324	17.239	24.3203
b1116	lolC	695.13	0.883763	0.168917	5.23192	1.67754e-07	7.32383e-07	482.649	494.994	488.375	861.477	1015.38	827.904
b1117	lolD	354.795	0.977722	0.203778	4.79798	1.60277e-06	6.15868e-06	208.872	254.357	253.819	524.446	487.002	400.272
b1118	lolE	938.913	0.180593	0.14627	1.23465	0.21696	0.30778	916.915	853.839	870.237	1006.37	1021.41	964.705
b1119	nagK	1292.56	-0.0341023	0.159839	-0.213355	0.83105	0.876344	1410.18	1283.4	1230.57	1393.8	1255.86	1181.56
b1120	cobB	377.069	0.234022	0.210545	1.1115	0.266351	0.366369	312.719	387.341	339.936	473.261	413.736	335.418
b1121	ycfZ	8.30516	-0.154937	0.808959	-0.191527	0.848113	0.888788	9.44056	3.16628	13.5975	3.14983	10.3434	10.1335
b1122	ymfA	4.79438	-0.035531	0.915912	-0.038793	0.969055	0.977608	2.36014	4.2217	7.93185	4.72474	3.4478	6.08008
b1123	potD	1298.25	0.563601	0.271679	2.07451	0.038032	0.0684857	641.958	1209.52	1291.76	1465.46	1742.86	1437.94
b1124	potC	152.236	0.618976	0.229651	2.69529	0.0070328	0.0149942	136.888	102.376	121.244	172.453	205.144	175.309
b1125	potB	186.39	1.26704	0.220147	5.75544	8.64162e-09	4.31786e-08	105.026	127.706	95.1822	243.324	277.548	269.55
b1126	potA	504.139	1.07397	0.174346	6.15999	7.275e-10	4.05995e-09	350.481	314.517	309.342	647.289	751.621	651.581
b1127	pepT	4793.79	1.11879	0.181698	6.15741	7.39448e-10	4.12139e-09	3614.56	2803.21	2651.5	6533.53	6988.69	6171.28
b1128	roxA	2269.55	-0.0358284	0.134996	-0.265404	0.790698	0.847012	2350.7	2245.94	2296.84	2303.31	2219.52	2200.99
b1129	phoQ	2494.69	1.64828	0.157714	10.4511	1.44838e-25	2.13466e-24	1348.82	1189.46	1082.13	3747.51	3708.97	3891.25
b1130	phoP	5923.28	1.7578	0.178153	9.86682	5.79728e-23	7.5625e-22	2885.27	2782.1	2443.01	7941.5	8901.36	10586.4
b1131	purB	725.981	1.58091	0.171659	9.2096	3.27353e-20	3.80353e-19	364.642	364.122	362.599	1028.42	1230.87	1005.24
b1132	hflD	425.236	0.80556	0.189878	4.2425	2.21042e-05	7.14886e-05	276.137	325.071	327.472	581.93	570.611	470.193
b1133	mnmA	956.893	0.859824	0.170838	5.03299	4.82897e-07	1.98957e-06	671.46	680.749	687.805	1239.46	1387.74	1074.15
b1134	nudJ	189.355	0.122201	0.251061	0.486737	0.626445	0.71743	189.991	202.642	151.838	236.237	203.42	152.002
b1135	rluE	248.39	0.00214419	0.222413	0.0096406	0.992308	0.994119	261.976	280.743	201.696	219.7	280.996	245.23
b1136	icd	34377.4	-2.24043	0.137678	-16.273	1.5341e-59	6.47861e-58	55800.8	58762.9	55673.7	12048.1	11256.2	12722.6
b1137	ymfD	41.3484	-0.767365	0.487355	-1.57455	0.11536	0.179515	25.9616	66.4918	63.4548	15.7491	37.9258	38.5071
b1138	ymfE	169.513	-1.55602	0.46281	-3.36213	0.000773449	0.00200768	166.39	287.076	304.81	28.3484	95.6765	134.775
b1139	lit	321.165	-0.476184	0.303472	-1.56912	0.116621	0.181309	325.699	382.064	412.456	164.578	261.171	381.018
b1140	intE	42.0973	-0.128745	0.493124	-0.261081	0.79403	0.849959	44.8427	51.7158	35.1268	14.9617	60.3365	45.6006
b1141	xisE	1.18044	-0.951333	2.57292	-0.369748	0.71157	0.787605	4.72028	0	0	2.36237	0	0
b1142	ymfH	43.1477	-1.0816	0.360978	-2.99631	0.0027327	0.00639584	47.2028	52.7713	75.9191	31.4983	24.1346	27.3603
b1143	ymfI	208.281	0.618122	0.313232	1.97337	0.0484538	0.0845151	143.969	144.593	203.962	175.603	219.797	361.765
b1144	ymfJ	28.6421	0.224796	0.467274	0.481079	0.63046	0.721089	42.4825	21.1085	15.8637	30.7108	35.34	26.347
b1145	ymfK	349.934	-0.136222	0.219455	-0.620728	0.534779	0.636878	326.88	385.23	386.394	268.523	329.265	403.312
b1146	ymfT	77.0684	-0.380535	0.353287	-1.07713	0.281424	0.383023	80.2448	67.5472	113.312	54.3345	51.717	95.2545
b1147	ymfL	19.4592	-0.998397	0.637401	-1.56636	0.117265	0.182241	21.2413	37.9953	18.1299	4.72474	10.3434	24.3203
b1148	ymfM	2.87012	-0.934486	1.25899	-0.742249	0.457936	0.563693	5.90035	2.11085	3.39936	2.36237	3.4478	0
b1149	ymfN	0	NA	NA	NA	NA	NA	0	0	0	0	0	0
b1150	ymfR	0	NA	NA	NA	NA	NA	0	0	0	0	0	0
b1151	beeE	3.42849	1.06071	1.27513	0.831844	0.405497	0.512796	2.36014	2.11085	2.26624	8.66202	5.1717	0
b1152	jayE	7.40795	-1.33319	0.85522	-1.55888	0.119024	0.184588	4.72028	14.776	12.4643	7.87456	2.58585	2.02669
b1153	ymfQ	4.17225	0.871294	1.08765	0.801083	0.423084	0.529246	0	4.2217	4.53249	4.72474	3.4478	8.10677
b1154	ycfK	5.31437	-1.60276	1.41766	-1.13056	0.258239	0.35655	2.36014	16.8868	4.53249	0	0	8.10677
b1155	tfaP	1.70665	0.983158	1.78981	0.549308	0.582794	0.678404	2.36014	0	1.13312	1.57491	5.1717	0
b1156	tfaE	3.31563	0.568355	1.21768	0.466752	0.640677	0.730492	4.72028	0	3.39936	6.29965	3.4478	2.02669
b1157	stfE	1.16442	-3.83493	2.45349	-1.56305	0.118041	NA	4.72028	0	2.26624	0	0	0
b1158	pinE	2.03473	-1.40114	1.6625	-0.842794	0.399344	0.506913	0	2.11085	6.79873	1.57491	1.7239	0
b1159	mcrA	22.482	0.348282	0.444507	0.783525	0.433319	0.538611	18.8811	22.1639	18.1299	18.899	28.4444	28.3737
b1160	iraM	126.212	8.39332	1.10063	7.62592	2.42303e-14	1.9244e-13	0	0	2.26624	116.544	293.925	344.538
b1161	ycgX	2.64453	3.62138	1.59419	2.27161	0.0231098	0.0439768	0	1.05543	0	4.72474	6.03365	4.05338
b1162	bluR	312.342	-0.859138	0.192398	-4.46541	7.99157e-06	2.78784e-05	352.841	427.447	427.187	207.889	215.488	243.203
b1163	bluF	97.3632	-1.20208	0.271795	-4.42274	9.74566e-06	3.34825e-05	126.268	147.76	132.575	44.885	63.7843	68.9075
b1164	ycgZ	20.1554	-3.85097	0.641227	-6.00562	1.90597e-09	1.01837e-08	40.1224	37.9953	35.1268	3.93728	1.7239	2.02669
b1165	ymgA	7.85683	-3.70553	1.09485	-3.3845	0.000713084	0.00185427	9.44056	23.2194	11.3312	3.14983	0	0
b1166	ariR	29.8512	-2.65158	0.446302	-5.94123	2.82885e-09	1.48438e-08	56.6434	55.9375	41.9255	7.87456	8.6195	8.10677
b1167	ymgC	23.2528	-3.55993	0.715708	-4.974	6.55848e-07	2.65483e-06	59.0035	44.3279	24.9287	3.14983	0	8.10677
b1168	pdeG	24.5165	-0.101904	0.422085	-0.24143	0.809222	0.86109	25.9616	23.2194	27.1949	28.3484	24.1346	18.2402
b1171	ymgD	38.5601	0.361791	0.407588	0.88764	0.374734	0.482846	25.9616	23.2194	52.1236	42.5226	43.9595	43.5739
b1172	ymgG	3.1489	2.85813	1.52695	1.8718	0.0612346	0.10404	2.36014	0	0	3.14983	10.3434	3.04004
b1174	minE	271.249	0.0548249	0.211468	0.259259	0.795436	0.851048	256.075	241.692	300.277	277.972	235.312	316.164
b1175	minD	3380.95	0.0828397	0.172649	0.479815	0.631359	0.721832	3264.08	3524.06	3062.83	3301.8	3103.88	4029.06
b1176	minC	1653.33	-0.100847	0.141752	-0.711429	0.476819	0.58269	1732.34	1644.35	1756.34	1546.56	1565.3	1675.06
b1177	ycgJ	311.484	0.523116	0.379044	1.38009	0.167558	0.246869	139.248	348.29	278.748	211.038	416.322	475.259
b1178	pliG	290.199	-1.42133	0.343086	-4.14279	3.431e-05	0.000108254	434.266	434.835	397.726	83.4704	145.67	245.23
b1179	ycgL	307.746	0.137118	0.244216	0.561465	0.574481	0.6714	273.776	295.519	309.342	248.049	298.235	421.552
b1180	ycgM	288.828	-0.351356	0.197422	-1.77972	0.0751222	0.124223	310.359	322.96	337.67	251.199	218.935	291.844
b1181	ycgN	221.06	-0.900148	0.265657	-3.38839	0.000703049	0.00183252	392.964	239.582	231.157	142.53	162.047	158.082
b1182	hlyE	345.221	2.81443	0.346564	8.12096	4.62513e-16	4.08724e-15	73.1644	80.2123	104.247	351.206	552.51	909.985
b1183	umuD	34.9523	0.718159	0.372932	1.92571	0.0541404	0.0929936	28.3217	31.6628	19.2631	44.0976	44.8214	41.5472
b1184	umuC	61.9251	-0.0426262	0.337284	-0.126381	0.899431	0.926213	46.0228	79.1569	63.4548	70.0836	67.2321	45.6006
b1185	dsbB	223.618	0.913757	0.194797	4.69081	2.72128e-06	1.00774e-05	152.229	146.704	166.569	303.958	301.683	270.563
b1186	nhaB	698.411	0.351494	0.158425	2.21867	0.026509	0.0498193	603.016	610.036	627.749	729.185	772.308	848.171
b1187	fadR	783.452	0.340601	0.175974	1.93551	0.0529272	0.0911594	592.395	728.243	753.526	894.551	916.253	815.744
b1188	ycgB	8574.19	-1.73803	0.210656	-8.2506	1.57605e-16	1.44209e-15	15635.9	12016	11927.2	3758.53	3302.13	4805.29
b1189	dadA	11415.6	-5.7868	0.168293	-34.3852	4.19138e-259	9.20427e-256	21877.3	23792.4	21605.2	435.463	345.642	437.765
b1190	dadX	5376.16	-5.19969	0.187059	-27.7971	4.7037e-170	2.29541e-167	10077.8	11094.6	10231	344.118	243.932	265.497
b1191	cvrA	433.35	0.130157	0.213447	0.609786	0.542004	0.642505	338.68	480.218	422.654	500.822	470.625	387.098
b1192	ldcA	534.897	0.0608138	0.175538	0.346443	0.72901	0.800453	500.35	589.983	480.443	581.93	520.618	536.06
b1193	emtA	122.38	0.815626	0.277697	2.93711	0.00331288	0.00764189	100.306	65.4364	100.848	176.39	164.633	126.668
b1194	ycgR	11.5982	-0.240659	0.602542	-0.399406	0.689594	0.770269	11.8007	16.8868	9.06497	13.3868	10.3434	8.10677
b1195	ymgE	127.876	-1.6105	0.299313	-5.38067	7.42103e-08	3.36706e-07	210.053	175.201	192.631	75.5958	38.7878	74.9876
b1196	ycgY	11.935	-0.118173	0.60243	-0.19616	0.844485	0.886679	14.1608	11.6097	11.3312	8.66202	8.6195	17.2269
b1197	treA	3018.15	0.32591	0.257254	1.26688	0.205198	0.293178	3752.62	2148.85	2134.8	3334.88	2953.9	3783.83
b1198	dhaM	798.916	-0.641122	0.180806	-3.54591	0.000391267	0.00106011	835.49	1060.7	1024.34	670.125	565.439	637.395
b1199	dhaL	451.383	-0.769627	0.182338	-4.22087	2.43362e-05	7.81921e-05	567.614	574.151	565.428	375.617	287.029	338.458
b1200	dhaK	831.896	-1.0112	0.16772	-6.02912	1.64855e-09	8.87308e-09	1046.72	1144.08	1145.59	611.854	493.898	549.234
b1201	dhaR	244.937	-0.625559	0.210259	-2.97519	0.00292808	0.00682236	261.976	321.905	308.209	211.826	202.558	163.149
b1202	ycgV	344.954	0.372069	0.186243	1.99776	0.0457428	0.0803289	333.96	283.909	284.413	358.293	424.08	385.071
b1203	ychF	950.183	1.05783	0.221944	4.76622	1.87717e-06	7.1258e-06	548.733	638.532	662.876	1324.5	1556.68	969.772
b1204	pth	178.124	1.32202	0.244903	5.39814	6.73368e-08	3.07425e-07	107.386	112.93	84.9841	227.575	306.854	229.016
b1205	ychH	4117.09	-2.05115	0.181939	-11.2738	1.76713e-29	3.00823e-28	6629.64	6911.98	6359.08	1816.66	1298.96	1686.21
b1206	dauA	326.794	0.724374	0.238653	3.03526	0.00240328	0.00568708	226.574	251.191	261.751	388.216	518.894	314.137
b1207	prs	6067.51	2.43721	0.146632	16.6213	4.88483e-62	2.21177e-60	1932.96	1832.22	1909.31	10277.9	11058	9394.73
b1208	ispE	2146.6	1.47656	0.145634	10.1389	3.71271e-24	5.16019e-23	1147.03	1193.69	1064	3201.8	3268.52	3004.57
b1209	lolB	1017.51	0.825381	0.17472	4.72403	2.3122e-06	8.65357e-06	856.731	695.525	650.412	1280.4	1295.51	1326.47
b1210	hemA	1218.52	0.254917	0.192014	1.3276	0.184311	0.267248	882.693	1269.68	1180.71	1307.97	1385.15	1284.92
b1211	prfA	695.773	1.75205	0.221744	7.90123	2.76156e-15	2.33695e-14	270.236	324.016	361.466	1126.85	1248.97	843.104
b1212	prmC	164.909	1.40773	0.327069	4.30407	1.67685e-05	5.5374e-05	60.1836	92.8774	117.845	266.948	290.477	161.122
b1213	ychQ	203.68	-0.293188	0.29629	-0.989532	0.322403	0.42831	154.589	196.309	321.806	164.578	186.181	198.616
b1214	ychA	745.648	0.339021	0.157814	2.14823	0.0316955	0.0582455	654.939	631.144	688.938	775.645	833.506	889.718
b1215	kdsA	3695.3	1.19019	0.167817	7.09222	1.31982e-12	9.36454e-12	1902.27	2401.09	2452.07	4931.84	5305.3	5179.21
b1216	chaA	279.215	1.38861	0.220924	6.28546	3.26881e-10	1.86692e-09	153.409	137.205	172.234	355.143	374.948	482.353
b1217	chaB	463.282	-0.256929	0.235211	-1.09234	0.274685	0.375831	651.399	383.119	479.31	455.15	409.426	401.285
b1218	chaC	645.269	0.302952	0.205505	1.47418	0.140433	0.21261	699.782	511.881	522.369	782.732	732.658	622.194
b1219	ychN	326.474	-0.0295918	0.264378	-0.11193	0.910879	0.936465	287.937	297.63	404.524	414.99	314.612	239.15
b1220	ychO	190.352	-0.142384	0.298007	-0.477786	0.632803	0.723203	130.988	211.085	257.219	177.965	218.935	145.922
b1221	narL	2065.32	0.212642	0.421506	0.504482	0.613923	0.705297	598.296	2499.25	2642.44	2291.5	2313.47	2046.96
b1222	narX	1566.76	0.102768	0.385803	0.266375	0.789951	0.846624	571.154	1936.71	2024.89	1560.74	1831.64	1475.43
b1223	narK	5253.14	1.53235	1.02288	1.49807	0.134116	0.204811	219.493	3645.44	4232.21	7174.52	9212.53	7034.65
b1224	narG	74733.1	2.28155	0.472858	4.82502	1.39986e-06	5.44087e-06	6243.75	29575.1	40673.4	122382	139776	109748
b1225	narH	24997.2	2.46477	1.04553	2.35743	0.018402	0.0358251	573.514	9256.08	13172.5	41962	46154	38864.9
b1226	narJ	6707.94	2.37149	0.997311	2.37789	0.0174122	0.034111	195.892	2887.64	3434.49	11943.4	12281.1	9505.19
b1227	narI	7262.59	2.28071	1.07484	2.1219	0.0338461	0.0618096	161.67	3391.08	3884.34	12496.9	13736	9905.46
b1228	ychS	37.2719	1.05372	0.415521	2.53589	0.0112161	0.0228803	17.7011	26.3856	28.328	33.0732	54.3029	63.8408
b1229	tpr	0	NA	NA	NA	NA	NA	0	0	0	0	0	0
b1230	tyrV	46.8023	-0.281494	0.408823	-0.688548	0.491108	0.598155	33.042	51.7158	69.1204	28.3484	56.0268	42.5605
b1231	tyrT	80.8932	0.0464852	0.421517	0.110281	0.912187	0.937303	33.042	86.5449	118.978	67.7213	93.9526	85.1211
b1232	purU	397.3	0.759007	0.199783	3.79916	0.000145187	0.000416771	263.156	273.355	349.001	480.348	550.786	467.153
b1233	ychJ	320.825	0.207242	0.197437	1.04966	0.293875	0.396894	258.435	290.242	344.469	318.92	349.09	363.791
b1234	rssA	1239.49	1.01496	0.179945	5.64038	1.69679e-08	8.23457e-08	955.857	812.677	693.47	1619.01	1634.26	1721.67
b1235	rssB	1274.5	-0.00255458	0.21007	-0.0121606	0.990297	0.993237	1615.52	1173.63	1037.94	1288.28	1204.14	1327.48
b1236	galU	2681.99	1.32623	0.151974	8.72669	2.62231e-18	2.69723e-17	1498.69	1555.7	1533.11	3428.59	4001.17	4074.66
b1237	hns	32183.1	0.429918	0.183272	2.3458	0.0189865	0.0368814	28259.2	28197.8	25811.4	31243.9	35331.3	44254.8
b1238	tdk	114.929	2.46744	0.281769	8.75696	2.00595e-18	2.07786e-17	35.4021	31.6628	38.5261	158.279	212.902	212.803
b1241	adhE	32411.9	0.408909	0.202637	2.01794	0.0435973	0.076992	34203.2	24656.8	24687.3	38092.4	31886.1	40945.3
b1242	ychE	78.057	0.0430834	0.322617	0.133544	0.893763	0.92254	64.9039	80.2123	84.9841	58.2718	71.5419	108.428
b1243	oppA	35392.1	-0.527523	0.208378	-2.53157	0.0113552	0.0231317	49579.5	37432.8	38361.8	25645.9	25939.5	35393.1
b1244	oppB	2277.76	0.953343	0.212405	4.48832	7.17862e-06	2.51223e-05	1661.54	1465.99	1526.31	2410.4	2790.13	3812.21
b1245	oppC	2072.97	1.31531	0.153624	8.56185	1.11074e-17	1.10371e-16	1283.92	1125.08	1156.92	3164	2949.59	2758.33
b1246	oppD	3120.5	1.41625	0.146746	9.65108	4.86429e-22	6.10399e-21	1737.06	1646.46	1720.08	4929.48	4451.11	4238.83
b1247	oppF	3603.98	1.36157	0.180996	7.52268	5.36664e-14	4.17913e-13	1725.26	1947.26	2385.22	5451.56	5276.86	4837.71
b1248	yciU	231.597	0.613718	0.194584	3.154	0.00161047	0.0039493	168.75	194.198	185.832	256.711	286.168	297.924
b1249	clsA	961.967	-0.368259	0.19823	-1.85774	0.0632065	0.106894	1314.6	951.994	985.816	874.864	750.759	893.771
b1250	kch	845.476	0.453586	0.207047	2.19074	0.0284707	0.0530872	685.621	774.682	679.873	769.345	999	1164.33
b1251	yciI	964.713	0.0667071	0.178814	0.373052	0.709109	0.78616	801.268	1005.82	1019.81	1030.78	899.014	1031.59
b1252	tonB	200.789	-1.58374	0.265846	-5.95735	2.56355e-09	1.35163e-08	365.822	275.466	262.884	129.143	91.3667	80.0543
b1253	yciA	100.993	1.93803	0.311839	6.21484	5.13765e-10	2.89289e-09	47.2028	46.4387	31.7274	128.355	204.282	147.949
b1254	yciB	217.401	0.0722452	0.225615	0.320214	0.748806	0.815009	221.853	183.644	230.024	188.202	217.211	263.47
b1255	yciC	320.223	0.303146	0.182754	1.65876	0.0971636	0.154743	305.638	275.466	278.748	327.582	344.78	389.125
b1256	ompW	4656.48	-0.734031	0.24765	-2.96398	0.00303685	0.00704959	7997.34	4539.38	4912.08	3809.71	3072.85	3607.51
b1257	yciE	79.1988	1.38298	0.325266	4.25183	2.12029e-05	6.87762e-05	37.7623	31.6628	62.3217	100.007	119.811	123.628
b1258	yciF	77.3066	1.20813	0.304489	3.96773	7.25594e-05	0.00021679	40.1224	45.3833	54.3898	82.6829	120.673	120.588
b1259	yciG	172.626	-0.244439	0.203447	-1.20149	0.229562	0.322636	195.892	175.201	190.364	148.042	156.013	170.242
b1260	trpA	573.606	-1.16342	0.184152	-6.31769	2.65497e-10	1.52227e-09	820.149	715.578	843.042	307.108	364.605	391.152
b1261	trpB	498.898	-1.39589	0.212357	-6.5733	4.92112e-11	2.99357e-10	817.789	740.908	610.752	320.495	231.865	271.577
b1262	trpC	310.2	-1.99326	0.186592	-10.6825	1.22918e-26	1.90091e-25	523.951	459.11	504.239	117.331	125.845	130.722
b1263	trpD	220.829	-1.99835	0.313557	-6.37315	1.85187e-10	1.07443e-09	266.696	306.073	487.242	114.181	64.6463	86.1344
b1264	trpE	33.4226	-0.297252	0.467969	-0.635196	0.525301	0.628986	29.5018	37.9953	43.0586	41.7352	13.7912	34.4538
b1265	trpL	14.8493	0.0799348	0.594238	0.134516	0.892994	0.921963	12.9808	22.1639	7.93185	10.2369	15.5151	20.2669
b1266	rnm	894.149	-0.308934	0.171101	-1.80556	0.0709863	0.118185	1078.58	928.774	962.02	867.777	821.439	706.302
b1267	yciO	1060.38	-0.278563	0.159443	-1.7471	0.0806206	0.132319	1301.62	1092.37	1093.46	943.373	957.627	973.826
b1268	yciQ	132.328	0.444183	0.264253	1.6809	0.0927823	0.149103	88.5053	111.875	135.975	177.178	128.431	152.002
b1269	rluB	439.971	0.857522	0.188866	4.54038	5.61531e-06	2.00492e-05	315.079	345.124	278.748	626.028	567.163	507.686
b1270	btuR	142.756	-0.959261	0.256535	-3.7393	0.000184535	0.000521208	162.85	187.866	215.293	120.481	81.8853	88.1611
b1271	yciK	630.161	-0.754316	0.157769	-4.78113	1.74309e-06	6.65711e-06	777.667	842.229	753.526	469.324	450.8	487.419
b1272	sohB	775.283	0.2148	0.147911	1.45222	0.146439	0.220185	693.882	714.523	744.461	818.167	833.506	847.157
b1273	yciN	1473.48	-0.655631	0.177623	-3.69114	0.000223255	0.000624942	1537.63	1909.26	1960.3	1044.17	1142.08	1247.43
b1274	topA	4207.51	0.313244	0.15453	2.02708	0.0426547	0.075697	4179.81	3606.39	3471.88	4729.46	4848.47	4409.07
b1275	cysB	769.528	-1.13094	0.296046	-3.82015	0.000133373	0.000385378	1603.72	767.294	798.851	461.449	468.039	517.82
b1276	acnA	131502	-4.33061	0.243319	-17.7981	7.31422e-71	4.01551e-69	333811	208418	209422	13237.1	10115.8	14004.4
b1277	ribA	2929.27	-1.06197	0.156367	-6.79153	1.10947e-11	7.19763e-11	4075.96	3820.64	3986.32	1841.07	1725.62	2126
b1278	pgpB	509.419	-0.744878	0.179123	-4.15848	3.20373e-05	0.000101448	659.659	588.927	665.142	334.669	389.602	418.512
b1279	lapA	515.674	-1.04812	0.178709	-5.86497	4.49221e-09	2.30488e-08	781.207	652.253	652.678	357.505	341.332	309.071
b1280	lapB	977.285	-0.330153	0.166774	-1.97964	0.0477438	0.0834425	1070.32	1029.04	1165.98	826.829	800.752	970.785
b1281	pyrF	259.75	2.10763	0.27124	7.77035	7.8271e-15	6.49842e-14	87.3252	108.709	97.4484	418.139	543.891	302.99
b1282	yciH	27.5717	2.36835	0.48012	4.93283	8.10465e-07	3.25371e-06	9.44056	8.4434	9.06497	55.9094	49.1312	33.4404
b1283	osmB	1146.72	-0.583466	0.205284	-2.84224	0.00447982	0.0100384	1663.9	1247.51	1214.71	788.244	934.354	1031.59
b1284	yciT	280.354	0.0402322	0.180055	0.223444	0.82319	0.871393	272.596	289.187	267.417	295.296	263.757	293.87
b1285	pdeR	901.775	0.160658	0.250643	0.640983	0.521534	0.626183	1185.97	717.689	651.545	941.01	967.97	946.465
b1286	rnb	1823.41	0.988333	0.961154	1.02828	0.303819	0.407318	2919.49	425.336	321.806	2529.31	2746.17	1998.32
b1287	yciW	902.458	-4.42606	1.69634	-2.60919	NA	NA	5064.86	55.9375	53.2567	70.0836	84.4711	86.1344
b1288	fabI	9795.55	0.799436	0.138692	5.7641	8.2097e-09	4.1114e-08	7250.35	7328.87	6867.85	12733.2	12980.1	11612.9
b1289	ycjD	38.4288	-0.889236	0.364523	-2.43945	0.0147095	0.0294191	60.1836	48.5496	40.7924	23.6237	24.9966	32.4271
b1290	sapF	307.694	0.244499	0.207106	1.18055	0.237782	0.331852	331.6	276.521	236.822	314.195	323.231	363.791
b1291	sapD	741.665	-0.0432473	0.167701	-0.257884	0.796497	0.851769	831.95	679.694	746.727	684.3	747.311	760.009
b1292	sapC	169.641	0.443283	0.227027	1.95256	0.0508719	0.0880684	161.67	130.873	139.374	215.763	206.006	164.162
b1293	sapB	291.765	0.217117	0.185982	1.16741	0.243046	0.338339	278.497	259.635	271.949	338.606	323.231	278.67
b1294	sapA	1160.2	-0.212404	0.169598	-1.2524	0.210424	0.299616	1418.44	1128.25	1189.78	1079.6	1010.21	1134.95
b1295	ymjA	78.5698	0.0428394	0.386597	0.110812	0.911766	0.937158	107.386	40.1062	84.9841	66.1463	100.848	71.9476
b1296	puuP	235.466	-3.45523	0.368087	-9.38698	6.17462e-21	7.40954e-20	643.138	385.23	266.284	45.6725	25.8585	46.6139
b1297	puuA	2631.26	-6.03784	0.284774	-21.2022	9.11345e-100	1.05332e-97	6680.38	5401.67	3468.48	83.4704	60.3365	93.2278
b1298	puuD	1123.38	-4.88942	0.234408	-20.8586	1.27335e-96	1.39814e-94	1969.54	2751.49	1799.4	71.6585	79.2994	68.9075
b1299	puuR	504.548	-3.57923	0.236557	-15.1305	1.01928e-51	3.36591e-50	1036.1	1051.2	705.935	70.0836	81.8853	82.081
b1300	puuC	980.744	-4.95919	0.857851	-5.78094	7.42851e-09	3.73723e-08	4097.21	1070.2	533.7	48.0348	60.3365	74.9876
b1301	puuB	633.913	-5.07636	1.0986	-4.62075	3.82355e-06	1.39246e-05	3005.64	452.777	235.689	48.0348	43.0975	18.2402
b1302	puuE	457.132	-4.14844	1.04586	-3.96654	NA	NA	2151.27	249.08	196.03	49.6098	43.0975	53.7073
b1303	pspF	405.082	-1.02816	0.201471	-5.10325	3.33868e-07	1.40079e-06	652.579	497.105	481.577	284.272	258.585	256.377
b1304	pspA	765.917	-0.206838	0.193726	-1.06768	0.285665	0.388313	728.104	929.83	803.383	662.251	643.015	828.917
b1305	pspB	30.6155	-0.580719	0.393993	-1.47393	0.1405	0.212638	33.042	44.3279	32.8605	29.9233	23.2727	20.2669
b1306	pspC	119.154	-0.473619	0.292261	-1.62054	0.105117	0.165831	110.927	186.81	117.845	117.331	88.7809	93.2278
b1307	pspD	34.8872	-1.50076	0.4375	-3.43031	0.000602903	0.00158845	50.743	39.0507	64.5879	10.2369	22.4107	22.2936
b1308	pspE	1833.19	-1.11578	0.236197	-4.72394	2.31314e-06	8.65357e-06	1771.29	2774.71	2980.11	1281.19	1004.17	1187.64
b1309	ycjM	27.2009	0.993636	0.508028	1.95587	0.0504807	0.0875636	30.6818	12.6651	11.3312	25.1986	44.8214	38.5071
b1310	ycjN	19.1793	0.706633	0.561267	1.259	0.208032	0.296456	9.44056	9.49883	24.9287	29.1359	25.8585	16.2135
b1311	ycjO	13.2681	1.08959	0.639751	1.70315	0.0885395	0.143455	3.54021	12.6651	9.06497	11.8118	23.2727	19.2536
b1312	ycjP	24.5149	0.00466965	0.459786	0.0101561	0.991897	0.993933	17.7011	27.4411	28.328	33.0732	17.239	23.307
b1313	ycjQ	69.1696	0.302757	0.301165	1.00529	0.314759	0.419551	56.6434	56.993	72.5198	92.9199	74.1277	61.8141
b1314	ycjR	54.7557	0.0875732	0.294768	0.297092	0.766396	0.828455	59.0035	52.7713	47.5911	56.6969	57.7507	54.7207
b1315	ycjS	75.4258	0.418011	0.310376	1.34679	0.178049	0.260144	59.0035	47.4941	87.2503	81.108	84.4711	93.2278
b1316	ycjT	75.0421	0.177129	0.302636	0.585286	0.558355	0.656748	55.4633	87.6003	67.9873	87.4077	64.6463	87.1478
b1317	ycjU	17.0525	-0.972529	0.579945	-1.67693	0.0935554	0.150017	14.1608	24.2748	29.4612	10.2369	18.101	6.08008
b1318	ycjV	10.9475	-0.604125	0.70601	-0.85569	0.39217	0.500264	4.72028	18.9977	15.8637	11.8118	5.1717	9.12011
b1319	ompG	5.09807	0.403677	1.02962	0.392065	0.69501	0.775332	2.36014	6.33255	4.53249	12.5993	1.7239	3.04004
b1320	ycjW	75.2612	0.871304	0.297218	2.93153	0.00337298	0.00776422	41.3025	56.993	61.1886	87.4077	115.501	89.1744
b1321	ycjX	1133.64	-1.45339	0.16024	-9.07004	1.18968e-19	1.32953e-18	1504.59	1830.11	1647.56	620.516	586.988	612.061
b1322	ycjF	692.617	-1.67098	0.170235	-9.81576	9.63134e-23	1.24781e-21	1010.14	1154.64	998.28	355.93	332.713	304.004
b1323	tyrR	2312.76	0.542191	0.171055	3.16969	0.001526	0.00376527	2183.13	1805.83	1661.16	2773.42	2848.75	2604.3
b1324	tpx	17221.4	-1.3947	0.155584	-8.96429	3.12276e-19	3.39484e-18	25048.2	25346	24463	8376.96	9520.24	10574.3
b1325	ycjG	902.605	-0.0728568	0.179396	-0.406123	0.684652	0.766503	1054.98	902.389	819.247	966.209	820.577	852.224
b1326	mpaA	795.813	0.348976	0.179607	1.943	0.0520165	0.0899086	823.689	636.421	640.214	878.801	870.57	925.185
b1327	ycjY	131.317	-0.128598	0.22815	-0.563656	0.572988	0.670369	147.509	123.485	140.507	111.819	137.912	126.668
b1328	pgrR	125.634	0.0346443	0.244865	0.141483	0.887488	0.918005	113.287	113.986	145.04	111.031	144.808	125.655
b1329	mppA	598.06	0.163725	0.195881	0.835843	0.403243	0.510387	677.361	509.77	505.372	602.404	603.365	690.089
b1330	ynaI	459.408	2.41562	0.268465	8.99788	2.30127e-19	2.52049e-18	136.888	173.09	124.643	537.045	829.196	955.585
b1331	insH4	4.3068	-1.90811	1.0222	-1.86668	0.0619464	0.105086	7.08042	5.27713	7.93185	0.787456	1.7239	3.04004
b1332	ynaJ	1229.11	-3.06583	0.249798	-12.2732	1.26114e-34	2.5292e-33	1650.92	2369.43	2566.52	203.951	258.585	325.284
b1333	uspE	30972.1	-0.388881	0.213272	-1.8234	0.0682421	0.114353	39790.8	32370.9	33201.6	24708	21889.2	33872.1
b1334	fnr	6322.21	-1.13414	0.157583	-7.19711	6.15041e-13	4.46489e-12	8942.58	8729.42	8387.36	3882.95	3538.31	4452.64
b1335	ogt	152.278	-0.351776	0.228206	-1.54148	0.123199	0.19019	158.129	168.868	184.699	118.906	124.983	158.082
b1336	abgT	53.4777	-1.1551	0.377961	-3.05613	0.00224214	0.00532008	62.5437	66.4918	92.916	41.7352	37.9258	19.2536
b1337	abgB	149.791	-1.04401	0.239278	-4.36315	1.28202e-05	4.31795e-05	207.692	196.309	201.696	96.0697	118.949	78.0276
b1338	abgA	57.8103	-1.16443	0.302177	-3.85348	0.000116451	0.000339609	75.5245	88.6557	75.9191	40.1603	36.2019	30.4004
b1339	abgR	138.07	-1.7038	0.244883	-6.95759	3.46131e-12	2.35691e-11	213.593	195.254	224.358	58.2718	56.8887	80.0543
b1340	smrA	175.287	-0.237418	0.234277	-1.01341	0.310866	0.415244	206.512	214.251	148.439	168.516	168.08	145.922
b1341	dgcM	1692.98	1.5273	0.291468	5.24001	1.60572e-07	7.02423e-07	1314.6	690.248	611.886	2267.09	2483.28	2790.75
b1342	zntB	1346.74	-0.529164	0.186849	-2.83204	0.00462513	0.010343	1865.69	1602.14	1305.36	1101.65	1133.46	1072.12
b1343	dbpA	436.909	0.811235	0.20734	3.91258	9.13166e-05	0.000269894	394.144	270.189	287.813	574.056	549.062	546.193
b1344	ttcA	576.817	0.499398	0.168403	2.9655	0.00302192	0.00702236	422.465	519.269	491.775	669.338	674.045	684.009
b1345	intR	149.432	0.936727	0.245494	3.81569	0.000135805	0.00039189	103.846	93.9328	109.913	162.216	236.174	190.509
b1346	xisR	4.67159	1.12414	1.01076	1.11218	0.266062	0.366086	0	4.2217	4.53249	6.29965	6.8956	6.08008
b1347	rcbA	0	NA	NA	NA	NA	NA	0	0	0	0	0	0
b1348	ralR	0	NA	NA	NA	NA	NA	0	0	0	0	0	0
b1349	recT	33.0804	-1.06553	0.390739	-2.72696	0.00639205	0.0138023	41.3025	41.1616	52.1236	22.8362	25.8585	15.2002
b1350	recE	55.6394	-0.151184	0.333771	-0.452957	0.65058	0.738332	41.3025	72.8243	61.1886	44.885	56.8887	56.7474
b1351	racC	6.90142	-0.189498	0.830752	-0.228104	0.819565	0.868985	2.36014	10.5543	9.06497	7.87456	3.4478	8.10677
b1352	kilR	1.21483	1.16743	2.18131	0.535198	0.592513	0.686265	0	0	2.26624	1.57491	3.4478	0
b1353	sieB	9.1057	1.94516	0.753475	2.58158	0.00983485	0.0203424	4.72028	2.11085	4.53249	14.1742	18.9629	10.1335
b1355	ydaG	0.372583	-2.19867	3.59831	-0.611028	0.541181	NA	1.18007	1.05543	0	0	0	0
b1356	racR	1027.28	-0.567679	0.28977	-1.95907	0.0501051	0.0870496	1001.88	1261.23	1416.4	544.132	764.55	1175.48
b1357	ydaS	43.4566	0.57561	0.472096	1.21926	0.222744	0.314766	20.0612	41.1616	43.0586	37.0105	35.34	84.1077
b1358	ydaT	24.3052	-1.01628	0.496228	-2.04802	0.0405582	0.0724406	25.9616	44.3279	27.1949	20.4739	8.6195	19.2536
b1359	ydaU	20.1694	0.0548707	0.564455	0.0972101	0.92256	0.944935	35.4021	12.6651	11.3312	15.7491	21.5488	24.3203
b1360	ydaV	4.85073	-0.229468	1.06154	-0.216165	0.828859	0.874873	7.08042	4.2217	4.53249	5.5122	7.75755	0
b1361	ydaW	23.4963	0.024462	0.495755	0.049343	0.960646	0.97238	35.4021	21.1085	13.5975	25.1986	28.4444	17.2269
b1362	rzpR	1.74635	-2.33455	1.97261	-1.18348	0.236618	0.330753	0	4.2217	4.53249	0	1.7239	0
b1363	trkG	70.5244	1.09203	0.368755	2.96141	0.00306232	0.00709	33.042	50.6604	50.9905	60.6341	99.1243	128.695
b1365	ynaK	3.27725	1.23695	1.52317	0.812086	0.416742	0.523401	5.90035	0	0	0.787456	6.8956	6.08008
b1366	ydaY	6.53143	-0.825621	0.796012	-1.0372	0.299644	0.402704	11.8007	4.2217	9.06497	4.72474	4.30975	5.06673
b1368	ynaA	31.3716	-0.879105	0.465587	-1.88816	0.0590039	0.100405	23.6014	35.8845	62.3217	22.8362	17.239	26.347
b1370	insH5	0	NA	NA	NA	NA	NA	0	0	0	0	0	0
b1372	stfR	115.813	-0.725012	0.230418	-3.1465	0.00165235	0.00403622	130.988	150.926	150.705	82.6829	85.3331	94.2412
b1373	tfaR	10.3221	0.494594	0.680838	0.72645	0.467563	0.573294	4.72028	6.33255	14.7306	14.9617	12.0673	9.12011
b1374	pinR	20.736	0.429744	0.525914	0.817137	0.41385	0.520902	14.1608	10.5543	28.328	26.7735	17.239	27.3603
b1375	ynaE	1.41181	-0.335784	2.11797	-0.15854	0.874031	0.907849	4.72028	0	0	0	1.7239	2.02669
b1376	uspF	12507.6	-1.28129	0.274414	-4.66919	3.02385e-06	1.11322e-05	23779.6	15255.1	14134.6	6681.57	5611.3	9583.21
b1377	ompN	18.7539	0.845914	0.520912	1.62391	0.104395	0.164751	7.08042	12.6651	20.3962	23.6237	22.4107	26.347
b1378	ydbK	26372.6	-0.182853	0.143003	-1.27866	0.201016	0.288518	30246.4	26409.9	27469.1	25806.5	23483	24820.9
b1379	hslJ	529.676	0.00690575	0.180469	0.0382657	0.969476	0.977608	562.894	569.93	452.115	522.871	506.827	563.42
b1380	ldhA	2018.26	0.112318	0.190172	0.590612	0.55478	0.653418	2190.21	1813.22	1816.39	2063.92	2445.35	1780.45
b1381	ydbH	465.201	-0.314009	0.173798	-1.80674	0.0708027	0.117924	460.228	540.378	546.164	435.463	390.464	418.512
b1382	ynbE	7.42747	-0.99385	1.04433	-0.951659	0.34127	0.449433	14.1608	2.11085	13.5975	8.66202	6.03365	0
b1383	ydbL	47.9148	-0.150827	0.376642	-0.400451	0.688824	0.769604	56.6434	53.8267	40.7924	33.0732	64.6463	38.5071
b1384	feaR	302.025	-4.12624	0.256273	-16.1009	2.5129e-58	1.01254e-56	476.749	610.036	626.616	31.4983	26.7205	40.5338
b1385	feaB	507.748	-1.23687	0.184614	-6.69979	2.08722e-11	1.31333e-10	821.329	674.417	643.613	322.07	292.201	292.857
b1386	tynA	87.3792	-0.650436	0.264458	-2.45951	0.0139128	0.0279147	118.007	100.265	101.981	74.0209	56.0268	73.9743
b1387	paaZ	36.9311	-0.960852	0.375394	-2.55959	0.0104797	0.0215649	51.9231	51.7158	43.0586	33.0732	21.5488	20.2669
b1388	paaA	47.322	-2.2851	0.419011	-5.45354	4.93763e-08	2.28998e-07	106.206	63.3255	65.721	9.44948	18.9629	20.2669
b1389	paaB	3.057	-2.00448	1.32286	-1.51527	0.129705	0.198949	2.36014	3.16628	9.06497	0	1.7239	2.02669
b1390	paaC	19.3068	-2.698	0.626174	-4.30871	1.6421e-05	5.43491e-05	42.4825	34.829	22.6624	1.57491	5.1717	9.12011
b1391	paaD	24.5431	-1.67787	0.523676	-3.20402	0.00135523	0.00338	46.0228	34.829	31.7274	13.3868	17.239	4.05338
b1392	paaE	34.7928	-1.36421	0.383959	-3.55302	0.000380841	0.00103378	57.8235	53.8267	38.5261	17.324	18.9629	22.2936
b1393	paaF	30.1673	-0.842802	0.43201	-1.95089	0.0510705	0.0883773	55.4633	34.829	26.0618	21.2613	24.1346	19.2536
b1394	paaG	20.773	-1.09413	0.463872	-2.3587	0.0183393	0.0357347	29.5018	29.5519	26.0618	15.7491	14.6532	9.12011
b1395	paaH	46.1502	-0.188466	0.397221	-0.474461	0.635171	0.725155	70.8042	30.6073	46.458	46.4599	49.1312	33.4404
b1396	paaI	21.7389	-0.0575782	0.471778	-0.122045	0.902863	0.929312	31.8619	20.0531	14.7306	21.2613	23.2727	19.2536
b1397	paaJ	512.987	-3.08978	0.192421	-16.0574	5.07786e-58	1.99125e-56	957.037	984.712	812.448	111.819	97.4004	114.508
b1398	paaK	713.358	-2.86792	0.24858	-11.5372	8.56376e-31	1.52275e-29	1135.23	1486.04	1142.19	161.429	129.293	225.976
b1399	paaX	719.507	-1.43466	0.202133	-7.09758	1.26957e-12	9.02258e-12	1214.29	1016.37	920.095	381.916	334.437	449.926
b1400	paaY	247.744	-0.77582	0.222548	-3.48608	0.000490157	0.00130629	265.516	334.57	338.803	211.826	182.733	153.015
b1402	insD2	0	NA	NA	NA	NA	NA	0	0	0	0	0	0
b1403	insC2	0	NA	NA	NA	NA	NA	0	0	0	0	0	0
b1404	insI2	0	NA	NA	NA	NA	NA	0	0	0	0	0	0
b1406	pdxI	1004.54	-0.812972	0.179086	-4.53955	5.63739e-06	2.00969e-05	1328.76	1398.44	1113.86	801.631	655.944	728.596
b1407	ydbD	22.1384	0.168482	0.441784	0.381367	0.702931	0.781596	16.521	22.1639	23.7955	20.4739	27.5824	22.2936
b1408	ynbA	3.83338	-0.111643	1.12503	-0.0992359	0.920951	0.943507	2.36014	8.4434	1.13312	6.29965	1.7239	3.04004
b1409	ynbB	2.40809	0.133917	1.41789	0.0944481	0.924753	0.946299	4.72028	0	2.26624	4.72474	1.7239	1.01335
b1410	ynbC	39.1711	-1.0094	0.418931	-2.40946	0.0159762	0.0316212	50.743	60.1592	46.458	40.1603	17.239	20.2669
b1411	ynbD	58.9073	-0.0864655	0.347181	-0.24905	0.803322	0.856602	68.4441	39.0507	74.786	66.1463	48.2692	56.7474
b1412	azoR	432.773	-0.076146	0.213445	-0.356747	0.721281	0.795017	345.761	467.553	518.97	390.578	454.248	419.525
b1413	hrpA	3822.04	-0.159579	0.166618	-0.957757	0.338185	0.445771	4388.68	4135.16	3576.13	3990.83	3327.13	3514.28
b1414	ydcF	499.465	-0.420408	0.191362	-2.19692	0.0280261	0.0523344	664.38	549.877	500.84	388.216	451.662	441.819
b1415	aldA	24871.9	-6.19994	0.175978	-35.2314	6.6109e-272	2.90351e-268	45605	53136.4	48486.3	676.425	567.163	760.009
b1418	cybB	167.73	-0.585571	0.199938	-2.92877	0.00340307	0.00782118	198.252	202.642	202.829	126.78	137.05	138.828
b1419	ydcA	58.8099	0.516674	0.344354	1.50042	0.133507	0.203952	49.563	39.0507	56.6561	53.547	92.2287	61.8141
b1420	mokB	0	NA	NA	NA	NA	NA	0	0	0	0	0	0
b1421	trg	125.457	-1.14436	0.249875	-4.57972	4.65594e-06	1.68165e-05	138.068	180.478	199.429	74.8084	75.8516	84.1077
b1422	ydcI	1703.91	-5.03436	0.24087	-20.9007	5.27465e-97	5.94007e-95	2454.55	3992.67	3474.15	114.969	99.9862	87.1478
b1423	ydcJ	3377.38	-1.3464	0.237547	-5.66795	1.44515e-08	7.08382e-08	6276.8	4154.15	4113.23	1967.07	1536.86	2216.19
b1424	opgD	1024.45	0.892452	0.168265	5.30385	1.13383e-07	5.0505e-07	801.268	660.696	690.071	1223.71	1353.26	1417.67
b1426	ydcH	2084.85	-1.07848	0.27958	-3.85751	0.000114547	0.000334783	2417.96	2830.65	3239.59	1092.2	980.038	1948.66
b1427	rimL	326.117	-0.436672	0.258301	-1.69056	0.0909212	0.146703	339.86	363.066	421.521	202.376	262.033	367.845
b1428	ydcK	680.612	-1.01381	0.268924	-3.76989	0.000163323	0.000466112	1262.68	788.403	679.873	438.613	386.154	527.953
b1429	tehA	389.23	1.03764	0.204339	5.07805	3.81332e-07	1.58599e-06	284.397	237.471	243.621	529.171	599.917	440.806
b1430	tehB	589.671	1.89313	0.254313	7.44408	9.76216e-14	7.50883e-13	165.21	258.579	326.339	907.15	905.91	974.839
b1431	ydcL	1155.91	1.67573	0.221003	7.58237	3.39296e-14	2.6802e-13	621.897	521.38	509.905	1414.27	1649.77	2218.21
b1432	insQ	913.918	-0.896914	0.187255	-4.78979	1.66954e-06	6.39843e-06	994.8	1197.91	1374.48	629.965	603.365	682.995
b1433	ydcO	226.536	-1.5339	0.300709	-5.10095	3.37949e-07	1.41629e-06	200.612	411.616	397.726	107.094	115.501	126.668
b1434	sutR	162.241	-1.06416	0.244554	-4.35145	1.3524e-05	4.53414e-05	182.911	256.468	218.692	107.882	87.9189	119.575
b1435	rlhA	377.464	0.494699	0.215308	2.29763	0.0215828	0.0414481	240.734	371.51	327.472	433.101	460.281	431.685
b1436	yncJ	19.3263	-1.07425	0.478461	-2.24522	0.024754	0.0467812	27.1416	26.3856	24.9287	8.66202	14.6532	14.1868
b1438	hicB	94.4048	0.273817	0.307344	0.890914	0.372975	0.481371	92.0455	82.3232	81.5847	73.2334	97.4004	139.842
b1439	ydcR	140.696	-0.169726	0.220446	-0.769921	0.441346	0.546334	156.949	139.316	150.705	121.268	148.255	127.682
b1440	ydcS	3117.98	-0.71286	0.236774	-3.01072	0.00260627	0.00612782	4900.83	3371.03	3347.24	2655.3	1816.99	2616.46
b1441	ydcT	1176.53	-0.172205	0.242262	-0.710822	0.477194	0.582825	1597.82	1147.25	994.881	1154.41	880.913	1283.91
b1442	ydcU	422.416	0.482243	0.240282	2.00699	0.0447505	0.0788069	435.446	324.016	298.011	529.171	384.43	563.42
b1443	ydcV	658.721	1.12341	0.247759	4.53428	5.78008e-06	2.05889e-05	535.752	352.512	355.8	1117.4	802.476	788.383
b1444	patD	2141.04	0.967152	0.197249	4.90319	9.42909e-07	3.74435e-06	1426.71	1435.38	1485.52	3478.2	2311.75	2708.67
b1445	ortT	31.3274	-0.254951	0.489442	-0.520901	0.602436	0.696106	22.4213	44.3279	35.1268	25.9861	15.5151	44.5872
b1446	ydcY	876.325	-0.387704	0.145808	-2.659	0.00783726	0.0165806	999.52	1004.76	975.617	759.895	731.796	786.356
b1447	ydcZ	56.2872	-0.47108	0.313167	-1.50425	0.132518	0.202582	49.563	70.7135	75.9191	48.8223	49.1312	43.5739
b1448	mnaT	201.681	-0.353631	0.26604	-1.32924	0.183769	0.266726	251.355	200.531	227.757	215.763	193.077	121.602
b1449	curA	2319.75	0.101274	0.162859	0.621854	0.534038	0.636497	2558.39	2082.35	2074.75	2493.09	2308.3	2401.63
b1450	mcbR	160.084	0.978445	0.36417	2.68678	0.00721446	0.0153443	168.75	99.21	55.5229	181.115	219.797	236.11
b1451	yncD	286.766	-0.137765	0.213842	-0.644237	0.519422	0.624488	336.32	289.187	275.348	243.324	249.104	327.311
b1452	yncE	485.064	-1.83278	0.287658	-6.37137	1.87344e-10	1.08551e-09	940.516	805.289	526.901	182.69	282.72	172.269
b1453	ansP	63.8627	-0.138928	0.353847	-0.392622	0.694599	0.775267	37.7623	81.2677	81.5847	62.9965	57.7507	61.8141
b1454	yncG	256.28	-0.854956	0.239453	-3.57045	0.00035637	0.000971124	415.385	284.965	290.079	201.589	155.151	190.509
b1455	yncH	0	NA	NA	NA	NA	NA	0	0	0	0	0	0
b1456	rhsE	15.873	-0.168426	0.522233	-0.32251	0.747066	0.81397	14.1608	18.9977	16.9968	11.0244	13.7912	20.2669
b1457	ydcD	6.48017	1.14147	1.03128	1.10685	0.26836	0.36867	3.54021	8.4434	0	5.5122	5.1717	16.2135
b1459	yncI	14.6582	1.34141	0.600897	2.23235	0.0255915	0.0482395	14.1608	6.33255	4.53249	19.6864	24.9966	18.2402
b1460	ydcC	21.1873	0.816412	0.456047	1.79019	0.073423	0.121918	18.8811	15.8314	11.3312	25.9861	26.7205	28.3737
b1461	pptA	299.027	-0.0468778	0.234476	-0.199926	0.841539	0.884008	277.317	336.681	296.878	222.063	308.578	352.644
b1462	yddH	170.229	-0.891121	0.215131	-4.14223	3.43952e-05	0.000108445	228.934	211.085	223.225	118.906	103.434	135.788
b1463	nhoA	740.475	-0.170268	0.197683	-0.861322	0.389061	0.49731	961.758	670.195	720.665	692.962	675.769	721.502
b1464	yddE	766.381	-0.40935	0.162057	-2.52596	0.0115382	0.0234718	837.85	959.381	826.045	696.112	651.634	627.261
b1465	narV	120.095	1.0151	0.348279	2.91463	0.00356107	0.0081502	42.4825	110.82	84.9841	185.052	165.494	131.735
b1466	narW	174.117	1.7361	0.383421	4.52791	5.95691e-06	2.11331e-05	33.042	84.434	123.51	255.136	292.201	256.377
b1467	narY	622.96	1.79795	0.307049	5.85557	4.75365e-09	2.43333e-08	152.229	370.454	311.608	852.028	1111.05	940.385
b1468	narZ	1589.29	2.29993	0.220196	10.4449	1.54584e-25	2.2631e-24	416.565	544.599	648.145	2349.77	3079.75	2496.88
b1469	narU	319.186	2.63188	0.232527	11.3186	1.06181e-29	1.836e-28	92.0455	84.434	89.5166	433.101	582.678	633.341
b1470	yddJ	1.65247	1.82922	2.07391	0.882014	0.377769	0.48613	0	2.11085	0	0	1.7239	6.08008
b1471	yddK	0.351808	-2.12734	4.04482	-0.525941	0.598929	NA	0	2.11085	0	0	0	0
b1472	yddL	0.262485	1.37038	4.05158	0.338233	0.735188	NA	0	0	0	1.57491	0	0
b1473	yddG	109.209	3.12096	0.334362	9.33409	1.01865e-20	1.20591e-19	33.042	21.1085	13.5975	167.728	212.04	207.736
b1474	fdnG	1895.03	3.40505	0.71623	4.75414	1.99297e-06	7.53282e-06	110.927	391.563	478.177	2492.3	5958.66	1938.53
b1475	fdnH	576.462	3.14165	0.723881	4.34001	1.42474e-05	4.76113e-05	35.4021	164.646	151.838	835.491	1629.95	641.448
b1476	fdnI	155.081	2.8493	0.370452	7.69141	1.4552e-14	1.17703e-13	36.5822	31.6628	45.3249	278.76	386.154	152.002
b1477	yddM	222.872	-0.544343	0.238871	-2.27882	0.0226778	0.043286	338.68	222.695	232.29	179.54	194.801	169.229
b1478	adhP	2080.19	0.00129777	0.2855	0.0045456	0.996373	0.996827	3096.51	1667.57	1474.19	2256.06	2127.29	1859.49
b1479	maeA	13993.3	2.81482	0.131533	21.4001	1.33225e-101	1.58142e-99	3454.07	3466.02	3527.41	23680.4	24341.5	25490.7
b1480	sra	22146.2	0.142551	0.262744	0.542549	0.587441	0.681648	19946.7	21505.3	21706.1	15735	21350.5	32633.8
b1481	bdm	14.7775	1.26954	0.650067	1.95294	0.0508269	0.0880598	9.44056	4.2217	12.4643	15.7491	33.6161	13.1735
b1482	osmC	11462.5	-0.638749	0.222098	-2.87599	0.00402768	0.00911833	18512.9	11842.9	11522.7	9128.98	9192.7	8574.93
b1483	ddpF	358.371	-0.276442	0.197233	-1.4016	0.161034	0.238778	456.687	339.847	381.862	338.606	335.299	297.924
b1484	ddpD	39.7707	-1.81997	0.403104	-4.51489	6.33488e-06	2.23297e-05	75.5245	69.6581	40.7924	15.7491	20.6868	16.2135
b1485	ddpC	36.2568	-1.85692	0.395188	-4.69881	2.61677e-06	9.73148e-06	55.4633	58.0484	56.6561	15.7491	10.3434	21.2803
b1486	ddpB	21.2596	-1.8601	0.525095	-3.54241	0.000396495	0.00107229	27.1416	37.9953	35.1268	9.44948	13.7912	4.05338
b1487	ddpA	161.803	-2.56689	0.288386	-8.90086	5.54162e-19	5.92185e-18	339.86	254.357	235.689	40.1603	37.9258	62.8275
b1488	ddpX	81.0839	-3.65322	0.473844	-7.70977	1.26047e-14	1.0214e-13	189.991	129.817	131.442	22.8362	4.30975	8.10677
b1489	dosP	419.611	-0.831906	0.945404	-0.879947	0.378888	0.487427	1280.38	173.09	158.637	292.934	302.545	310.084
b1490	dosC	337.706	-1.28466	0.965256	-1.33091	0.18322	0.266193	1148.21	161.48	126.91	187.415	179.286	222.936
b1491	digH	426.557	1.17769	0.251361	4.68524	2.79634e-06	1.0326e-05	349.301	210.03	225.491	562.244	523.204	689.075
b1492	gadC	105174	-0.617227	0.282271	-2.18665	0.0287682	0.0534475	182180	102484	97340.8	71108.9	73502	104427
b1493	gadB	164005	-0.596085	0.234102	-2.54627	0.0108882	0.0223045	261265	173960	157012	126007	116060	149726
b1494	pqqL	71.5718	-0.0284522	0.365434	-0.0778587	0.93794	0.955785	49.563	90.7666	75.9191	47.2474	70.6799	95.2545
b1495	yddB	22.7024	-0.612901	0.556793	-1.10077	0.270996	0.371594	14.1608	29.5519	38.5261	22.0488	8.6195	23.307
b1496	yddA	5.12033	-0.127767	1.37161	-0.0931512	0.925783	0.947133	11.8007	4.2217	0	0	8.6195	6.08008
b1497	ydeM	19.7392	-0.618803	0.564131	-1.09691	0.272679	0.373419	11.8007	36.9399	22.6624	10.2369	15.5151	21.2803
b1498	ydeN	1654.52	-2.51719	0.242723	-10.3706	3.37381e-25	4.87426e-24	2897.07	2721.94	2830.54	415.777	381.844	679.955
b1499	ydeO	11.035	1.66436	0.706471	2.35588	0.018479	0.0359432	7.08042	4.2217	4.53249	10.2369	13.7912	26.347
b1500	safA	0.131243	0.616126	4.08047	0.150994	0.879981	NA	0	0	0	0.787456	0	0
b1501	ydeP	93.7025	-0.0824905	0.30716	-0.268558	0.78827	0.845441	77.8847	135.094	75.9191	97.6446	84.4711	91.2011
b1502	ydeQ	8.38787	1.80406	0.913317	1.97528	0.0482367	0.0841699	0	2.11085	9.06497	9.44948	15.5151	14.1868
b1503	ydeR	2.11967	0.901388	1.60046	0.563206	0.573295	0.67037	2.36014	2.11085	0	3.93728	4.30975	0
b1504	ydeS	6.41873	2.20952	0.980107	2.25436	0.0241732	0.0458217	2.36014	0	4.53249	8.66202	7.75755	15.2002
b1505	ydeT	19.8548	0.634726	0.640896	0.990373	0.321992	0.427894	4.72028	14.776	27.1949	22.0488	36.2019	14.1868
b1506	yneL	1.41911	-1.76691	2.10162	-0.840738	0.400495	0.507902	0	4.2217	2.26624	0	0	2.02669
b1507	hipA	349.381	-1.7471	0.17429	-10.0241	1.1947e-23	1.60462e-22	515.691	563.597	535.966	163.791	161.185	156.055
b1508	hipB	167.896	-1.38502	0.290592	-4.76622	1.87716e-06	7.1258e-06	199.432	276.521	251.553	66.1463	87.057	126.668
b1511	lsrK	1645.13	-3.39235	0.373687	-9.07804	1.10546e-19	1.24173e-18	5162.81	2013.75	1835.66	277.972	231.003	349.604
b1512	lsrR	2081.88	-3.64459	0.297023	-12.2704	1.30608e-34	2.60742e-33	5523.91	3184.22	2857.73	296.084	236.174	393.178
b1513	lsrA	3144.84	-4.91102	0.365581	-13.4334	3.85051e-41	9.34333e-40	9874.83	4255.47	4131.36	214.188	132.74	260.43
b1514	lsrC	945.407	-4.24998	0.425174	-9.99588	1.5887e-23	2.12084e-22	3185.01	1155.69	1048.14	95.2822	58.6126	129.708
b1515	lsrD	568.929	-3.48775	0.367419	-9.49258	2.25381e-21	2.74555e-20	1774.83	652.253	707.068	88.1951	93.9526	97.2812
b1516	lsrB	1104.01	-2.65109	0.680834	-3.89388	9.86521e-05	0.000290792	3810.45	873.892	1030.01	330.732	257.723	321.231
b1517	lsrF	1272.41	-2.76147	0.782899	-3.52723	0.00041993	0.00113011	4776.93	970.991	905.364	337.819	277.548	365.818
b1518	lsrG	709.889	-2.64679	0.822549	-3.21779	0.00129184	0.00322923	2626.84	538.267	507.638	145.679	155.151	285.764
b1519	tam	1680.87	-0.70287	0.326071	-2.15557	0.0311172	0.0573266	3359.66	1500.81	1386.94	1151.26	1412.74	1273.78
b1520	yneE	224.294	-0.73928	0.271595	-2.72199	0.00648892	0.0139752	381.163	255.413	205.095	151.979	181.872	170.242
b1521	uxaB	744.906	1.15582	0.187353	6.16921	6.86318e-10	3.835e-09	390.603	482.329	511.038	947.31	998.139	1140.01
b1522	dgcF	241.695	-0.826586	0.2271	-3.63974	0.00027291	0.000754799	245.455	375.731	305.943	182.69	168.08	172.269
b1523	yneG	359.072	-0.0549771	0.270083	-0.203557	0.8387	0.881659	259.616	397.895	439.651	265.373	389.602	402.298
b1524	glsB	169.027	0.59695	0.252364	2.36543	0.0180091	0.0351538	129.808	139.316	134.841	211.826	247.38	150.989
b1525	sad	329.686	-0.390101	0.177208	-2.20137	0.0277097	0.0518539	338.68	396.84	386.394	294.509	280.996	280.697
b1526	yneJ	99.8746	0.0944277	0.2436	0.387634	0.698287	0.777409	89.6854	94.9883	105.38	113.394	102.572	93.2278
b1527	yneK	7.63972	-0.320234	0.957392	-0.334486	0.738013	0.807672	4.72028	8.4434	12.4643	15.7491	3.4478	1.01335
b1528	ydeA	72.5566	0.27382	0.323246	0.847096	0.396942	0.504447	84.9651	42.217	70.2535	80.3206	83.6092	73.9743
b1529	marC	359.513	-0.123088	0.22697	-0.542312	0.587603	0.681657	462.588	313.461	349.001	396.091	302.545	333.391
b1530	marR	82.4622	0.0337297	0.392898	0.0858485	0.931587	0.951519	54.2832	109.764	80.4516	72.446	124.121	53.7073
b1531	marA	175.076	0.21325	0.317755	0.671116	0.502147	0.608976	95.5857	156.203	234.556	190.564	181.01	192.536
b1532	marB	62.879	0.052434	0.335633	0.156224	0.875856	0.90897	40.1224	77.046	67.9873	74.0209	60.3365	57.7607
b1533	eamA	332.884	-1.80849	0.245696	-7.36071	1.82936e-13	1.38527e-12	390.603	594.204	568.827	166.941	120.673	156.055
b1534	ydeE	189.392	-0.923865	0.218776	-4.22289	2.41195e-05	7.76633e-05	243.095	236.415	264.017	121.268	115.501	156.055
b1535	dgcZ	172.719	2.1757	0.274159	7.93589	2.0899e-15	1.77634e-14	75.5245	60.1592	52.1236	215.763	303.407	329.337
b1536	ydeI	251.236	0.28852	0.198457	1.45382	0.145997	0.219693	245.455	213.196	219.826	241.749	297.373	289.817
b1537	ydeJ	60.9692	1.64478	0.302711	5.43351	5.52574e-08	2.54927e-07	29.5018	28.4965	30.5943	88.9826	87.9189	100.321
b1538	dcp	1789.29	0.301843	0.170102	1.77448	0.0759842	0.12546	1377.14	1681.29	1749.54	2029.28	1828.2	2070.27
b1539	ydfG	2311.84	0.21462	0.184945	1.16045	0.245864	0.341612	1772.47	2156.23	2491.73	2615.14	2303.13	2532.35
b1540	rspR	426.763	0.617091	0.21283	2.89945	0.00373816	0.00851113	287.937	324.016	398.859	530.746	579.231	439.792
b1541	ydfZ	694.824	-0.535562	0.360669	-1.48491	0.137567	0.208991	363.462	1024.82	1078.73	618.941	618.88	464.112
b1542	ydfI	41.9843	-0.825495	0.367847	-2.24413	0.0248242	0.0468835	51.9231	39.0507	70.2535	33.8606	28.4444	28.3737
b1543	ydfJ	29.6338	-0.62477	0.418946	-1.49129	0.135885	0.206866	30.6818	33.7736	43.0586	18.899	18.9629	32.4271
b1544	ydfK	9.54524	0.900494	0.671827	1.34037	0.180127	0.262568	4.72028	8.4434	6.79873	11.8118	16.3771	9.12011
b1545	pinQ	19.0968	0.670942	0.568709	1.17976	0.238095	0.332077	4.72028	18.9977	20.3962	28.3484	19.8249	22.2936
b1546	tfaQ	30.3705	0.0773792	0.457245	0.169229	0.865616	0.903252	22.4213	43.2724	22.6624	20.4739	37.9258	35.4671
b1547	stfQ	22.366	-0.829153	0.466775	-1.77635	0.0756761	0.124998	35.4021	25.3302	24.9287	14.1742	12.0673	22.2936
b1548	nohA	83.1956	-0.00289811	0.364076	-0.00796018	0.993649	0.994859	49.563	99.21	100.848	62.2091	110.33	77.0143
b1549	ydfO	14.9568	4.24256	0.99085	4.28174	1.85438e-05	6.08704e-05	2.36014	2.11085	0	12.5993	18.9629	53.7073
b1550	gnsB	292.49	0.157049	0.288641	0.544096	0.586375	0.680952	208.872	287.076	333.138	214.976	308.578	402.298
b1551	ynfN	1.05124	-0.326135	2.05782	-0.158485	0.874074	NA	2.36014	0	1.13312	0.787456	0	2.02669
b1552	cspI	29.3881	-0.103174	0.465414	-0.221683	0.824561	0.872098	20.0612	36.9399	33.9936	27.561	17.239	40.5338
b1553	rzpQ	0.307147	-0.345646	3.8917	-0.0888162	0.929228	NA	0	1.05543	0	0.787456	0	0
b1554	rrrQ	2.47312	-1.00106	1.54108	-0.649584	0.515961	0.62136	0	3.16628	6.79873	3.14983	1.7239	0
b1555	ydfR	1.69402	1.73438	2.06356	0.840478	0.40064	0.507902	2.36014	0	0	0	1.7239	6.08008
b1556	essQ	1.31168	-0.542532	2.50594	-0.216498	0.828599	0.87481	4.72028	0	0	3.14983	0	0
b1557	cspB	201.621	0.646374	0.265424	2.43525	0.0148814	0.0297087	126.268	182.589	162.036	209.463	211.178	318.191
b1558	cspF	12.3616	0.0173767	0.599243	0.0289978	0.976866	0.982236	7.08042	12.6651	16.9968	9.44948	13.7912	14.1868
b1559	ydfT	32.8228	-0.0539407	0.396625	-0.135999	0.891822	0.921269	31.8619	23.2194	45.3249	33.0732	31.0302	32.4271
b1560	ydfU	20.8091	-1.13161	0.558257	-2.02703	0.042659	0.075697	16.521	42.217	27.1949	18.899	12.9293	7.09342
b1561	rem	15.7658	-1.73864	0.530675	-3.27628	0.00105184	0.00266725	23.6014	23.2194	26.0618	7.87456	7.75755	6.08008
b1562	hokD	230.051	-0.936232	0.21344	-4.38639	1.15249e-05	3.91776e-05	285.577	283.909	337.67	183.477	150.841	138.828
b1563	relE	210.25	-1.12745	0.225002	-5.01084	5.41937e-07	2.22033e-06	328.06	297.63	240.222	146.467	133.602	115.521
b1564	relB	508.14	-0.880193	0.242022	-3.63682	0.000276022	0.000761967	706.862	753.574	514.437	273.247	391.325	409.392
b1565	ydfV	23.5375	0.461752	0.441932	1.04485	0.296092	0.398907	16.521	20.0531	22.6624	25.9861	21.5488	34.4538
b1566	flxA	13.7347	0.0437368	0.544088	0.0803856	0.935931	0.953958	16.521	12.6651	11.3312	11.0244	14.6532	16.2135
b1567	ydfW	3.37262	-1.5265	1.44928	-1.05328	0.292214	0.395014	8.26049	0	6.79873	3.14983	0	2.02669
b1568	ydfX	3.55012	0.465712	1.01467	0.458979	0.646249	0.735209	2.36014	3.16628	3.39936	3.14983	5.1717	4.05338
b1569	dicC	2.55769	-0.0578488	1.49783	-0.0386217	0.969192	0.977608	4.72028	3.16628	0	3.14983	4.30975	0
b1570	dicA	705.114	-0.864292	0.258745	-3.34032	0.000836819	0.00215861	863.812	975.213	890.633	331.519	512.86	656.648
b1571	ydfA	5.70239	-0.603655	0.977936	-0.617274	0.537054	0.638188	7.08042	1.05543	12.4643	2.36237	5.1717	6.08008
b1572	ydfB	1.62938	0.308866	1.6	0.193042	0.846926	0.888393	0	3.16628	1.13312	1.57491	0.86195	3.04004
b1573	ydfC	19.1304	-0.709188	0.518061	-1.36893	0.171022	0.251467	22.4213	26.3856	22.6624	22.8362	10.3434	10.1335
b1574	dicF	3.64144	-0.417971	1.22751	-0.340503	0.733478	0.803551	7.08042	2.11085	3.39936	2.36237	6.8956	0
b1575	dicB	1.31576	1.30105	2.16031	0.602252	0.547006	0.646864	0	0	2.26624	1.57491	0	4.05338
b1576	ydfD	1.51757	-0.558209	1.82521	-0.305833	0.759732	0.822871	0	4.2217	1.13312	0	1.7239	2.02669
b1577	ydfE	12.6807	0.659084	0.60983	1.08077	0.279801	0.381523	11.8007	4.2217	13.5975	15.7491	15.5151	15.2002
b1578	insD7	0.168891	0.616126	4.08047	0.150994	0.879981	NA	0	0	0	0	0	1.01335
b1579	intQ	16.8345	-0.13013	0.520429	-0.250044	0.802553	0.856298	21.2413	20.0531	11.3312	12.5993	15.5151	20.2669
b1580	rspB	17.1971	0.656078	0.591324	1.10951	0.267212	0.367437	9.44056	16.8868	13.5975	10.2369	32.7541	20.2669
b1581	rspA	42.8922	0.366933	0.420845	0.871894	0.383266	0.491619	37.7623	52.7713	21.5293	34.6481	50.8551	59.7874
b1582	ynfA	27.8506	-0.0611362	0.430047	-0.142162	0.886952	0.917667	18.8811	36.9399	29.4612	26.7735	32.7541	22.2936
b1583	ynfB	696.467	1.36381	0.180308	7.56381	3.91444e-14	3.07553e-13	401.224	374.676	393.193	868.564	1004.17	1136.97
b1584	speG	634.796	1.94914	0.218365	8.92606	4.41439e-19	4.75196e-18	217.133	320.849	244.754	860.69	1056.75	1108.6
b1585	ynfC	253.612	-0.364581	0.180633	-2.01836	0.0435541	0.0769468	293.838	284.965	277.615	226.787	209.454	229.016
b1586	ynfD	1621.77	-0.429515	0.180668	-2.37737	0.0174364	0.034142	2161.89	1760.45	1662.29	1507.19	1251.55	1387.27
b1587	ynfE	2604.4	3.51035	0.326873	10.7392	6.66392e-27	1.04903e-25	599.476	325.071	336.537	5123.19	2940.11	6302
b1588	ynfF	2024.83	4.44941	0.296857	14.9884	8.74685e-51	2.82472e-49	212.413	169.923	149.572	4685.37	2293.65	4638.08
b1589	ynfG	463.389	4.12618	0.382848	10.7776	4.39198e-27	7.03999e-26	60.1836	29.5519	61.1886	1100.86	453.386	1075.16
b1590	ynfH	484.036	2.18025	0.322149	6.76785	1.30713e-11	8.44249e-11	133.348	195.254	196.03	870.139	452.524	1056.92
b1591	dmsD	459.467	1.7452	0.237501	7.34818	2.0093e-13	1.5111e-12	164.03	251.191	217.559	706.348	582.678	834.997
b1592	clcB	47.6948	0.444072	0.356951	1.24407	0.213474	0.303227	27.1416	45.3833	48.7242	58.2718	62.0604	44.5872
b1593	bidA	1279.07	1.50049	0.166715	9.00032	2.25053e-19	2.47108e-18	621.897	686.026	695.737	1663.11	2008.34	1999.33
b1594	mlc	972.604	-1.14154	0.173048	-6.59666	4.2053e-11	2.58317e-10	1237.89	1456.49	1321.22	576.418	685.251	558.354
b1595	ynfL	174.898	-0.10722	0.245458	-0.436818	0.662243	0.748424	232.474	147.76	164.303	177.178	159.461	168.215
b1596	ynfM	4076.76	2.13132	0.185144	11.5117	1.15168e-30	2.03958e-29	1813.77	1429.05	1303.09	6415.41	6320.68	7178.54
b1597	asr	1067.09	4.32456	0.227191	19.0349	8.7612e-81	6.75074e-79	121.547	100.265	82.7179	1667.83	2129.88	2300.3
b1598	ydgD	2471.11	-1.10023	0.156674	-7.02238	2.18123e-12	1.51342e-11	3754.98	3279.21	3076.42	1593.02	1500.66	1622.37
b1599	mdtI	12.1568	-0.535549	0.596435	-0.897917	0.36923	0.477379	9.44056	20.0531	13.5975	8.66202	12.0673	9.12011
b1600	mdtJ	11.8181	3.24668	0.809031	4.01305	5.99392e-05	0.000180557	2.36014	2.11085	2.26624	13.3868	22.4107	28.3737
b1601	tqsA	198.084	1.96152	0.222542	8.81415	1.206e-18	1.26717e-17	67.264	81.2677	94.0491	302.383	311.164	332.377
b1602	pntB	2587.03	-0.123117	0.167027	-0.737111	0.461055	0.566579	2302.32	2907.7	2881.53	2473.4	2360.02	2597.21
b1603	pntA	2581.39	-0.0333789	0.151797	-0.219892	0.825955	0.872647	2465.17	2733.55	2634.51	2578.92	2328.99	2747.18
b1604	ydgH	2120.54	1.48028	0.136672	10.8309	2.45674e-27	3.95239e-26	1099.83	1138.8	1118.39	3185.26	3146.98	3033.96
b1605	ydgI	102.034	0.795445	0.290008	2.74284	0.00609106	0.0132106	89.6854	64.3809	70.2535	151.979	139.636	96.2679
b1606	folM	222.267	0.219797	0.189123	1.16219	0.245158	0.340955	199.432	208.974	207.361	222.85	239.622	255.363
b1607	ydgC	98.9292	-3.29231	0.366288	-8.98832	2.51042e-19	2.74273e-18	153.409	166.757	217.559	10.2369	17.239	28.3737
b1608	rstA	1528.32	4.66157	0.179741	25.9348	2.69626e-148	9.10921e-146	126.268	120.318	101.981	2775.78	2959.94	3085.64
b1609	rstB	1338.78	3.63351	0.192441	18.8812	1.62976e-79	1.19299e-77	168.75	192.087	237.955	2297.8	2478.11	2658.01
b1610	tus	450.677	-1.25529	0.174468	-7.19496	6.248e-13	4.5208e-12	627.798	644.865	632.282	241.749	259.447	297.924
b1611	fumC	4933.06	-3.77759	0.199068	-18.9764	2.67233e-80	1.9893e-78	10187.5	9043.94	8354.5	686.662	535.271	790.41
b1612	fumA	9509.52	-4.19743	0.207212	-20.2567	3.10101e-91	2.89779e-89	14138.4	19883.2	20086.8	1131.57	875.742	941.398
b1613	manA	2844.14	0.00938287	0.19579	0.0479232	0.961777	0.973077	2682.3	2760.99	3060.56	2478.91	2561.72	3520.36
b1614	ydgA	17580.7	0.112911	0.19102	0.591096	0.554456	0.653313	19342.5	15547.5	15788.9	16248.4	16821.8	21735.3
b1615	uidC	10.2314	-0.452932	0.693276	-0.653322	0.513549	0.619304	4.72028	12.6651	18.1299	9.44948	10.3434	6.08008
b1616	uidB	42.7933	-0.617727	0.366592	-1.68505	0.0919783	0.148245	49.563	44.3279	61.1886	26.7735	29.3063	45.6006
b1617	uidA	139.127	-0.300543	0.302486	-0.993576	0.320429	0.425946	99.1259	181.533	180.166	140.167	134.464	99.3079
b1618	uidR	991.099	-0.973588	0.185554	-5.24692	1.54665e-07	6.77255e-07	1358.26	1232.74	1348.41	642.564	573.197	791.423
b1619	hdhA	4032.18	-0.108615	0.162295	-0.669245	0.503339	0.609503	4421.72	3917.74	4211.81	3385.28	4051.17	4205.39
b1620	malI	99.7931	-0.843498	0.24424	-3.45357	0.000553226	0.00146108	113.287	131.928	139.374	75.5958	70.6799	67.8942
b1621	malX	273.038	0.373411	0.240967	1.54963	0.121229	0.18761	174.65	273.355	265.15	302.383	274.1	348.591
b1622	malY	453.241	0.0321622	0.201161	0.159883	0.872973	0.907849	485.009	444.334	414.722	431.526	395.635	548.22
b1623	add	2797.9	0.809545	0.163599	4.94834	7.48472e-07	3.01586e-06	2255.11	1781.56	2062.28	3584.5	3355.57	3748.37
b1624	ydgJ	1220.24	-0.266569	0.158773	-1.67893	0.0931654	0.149555	1471.55	1267.57	1258.9	1043.38	1165.36	1114.68
b1625	cnu	208.181	1.25246	0.26221	4.77657	1.78314e-06	6.80413e-06	105.026	143.538	120.111	221.275	297.373	361.765
b1626	ydgK	883.728	1.48522	0.248277	5.98212	2.20257e-09	1.16691e-08	328.06	577.318	489.508	1089.84	1491.17	1326.47
b1627	rsxA	119.667	1.81781	0.277806	6.54347	6.01072e-11	3.62625e-10	47.2028	59.1038	52.1236	149.617	227.555	182.402
b1628	rsxB	68.9478	2.23457	0.348253	6.4165	1.3944e-10	8.1765e-10	17.7011	25.3302	29.4612	126.78	129.293	85.1211
b1629	rsxC	394.805	2.82294	0.260273	10.8461	2.08211e-27	3.362e-26	70.8042	123.485	98.5816	734.697	786.961	554.3
b1630	rsxD	109.86	2.07108	0.348297	5.94631	2.74259e-09	1.44084e-08	21.2413	48.5496	56.6561	161.429	211.178	160.109
b1631	rsxG	60.2101	2.00618	0.367062	5.46551	4.61566e-08	2.14973e-07	12.9808	33.7736	24.9287	101.582	100.848	87.1478
[truncated: 3,064 more rows]

## Sheet: WTMPR4 vs Wt
Gene_IDs	log2FoldChange	pvalue	padj	wt baseMean	WTmpR4 baseMean	Gene_name
[truncated: 4,464 more rows]

[truncated: 2 more sheets: WTMPR1 vs Wt Duplicated genes, E. coli mgrB vs Wt]
